# Supplementary material for: Traditional Herbal Medicine in Mesoamerica: Toward Its Evidence Base for Improving Universal Health Coverage
Source: PubMed Central journal article supplement (PMC7411306; doi:10.3389/fphar.2020.01160), 2020-07-31
Supplement: DataSheet_2.pdf [file DataSheet_2.pdf]

**Table A4.2.**

Alphabetical list of the 995 botanical genera used medicinally in Mesoamerica. Abbreviations are as follows: Mixe-Zoque (MZ), Zoquean (Zoque), Totonac (Tot), pan-Mayan (Maya), Huastec (Hua), Core Mayan (CoreM), Yucatecan (Yuc), Quichean (Quich), Western Mayan (WesM), Zapotec (Zap), Nahuatl (Nah); a capital "C" stands for consonant and a capital "V" for vowel. A ">" B signifies that A is the probable donor and B the probable recipient, A "<" B signifying that no conclusion can be drawn on the directionality of the language contact.

***Abelmoschus* (Malvaceae)**

Spanish names: Algalia; Arcalia, doña alpíte, curalina; Boraja; Café chino; Curalina; Santa elena, semilla de vibora

Indigenous names: Almiz, almisy<sup>01</sup>; Tsa'ant ujts<sup>04</sup>; Kwinim ilaal<sup>07</sup>; K'inál, Xaq K'inál, Ruhi Xul<sup>14</sup>; Alkalia<sup>20</sup>

Used by (10\*): Zoque<sup>01, 02, 03</sup>; Mixe<sup>04</sup>; Totonac<sup>05</sup>; Huastec<sup>07</sup>; Yucatecan Maya<sup>09</sup>; Quichean Maya<sup>14</sup>; Western Maya<sup>19, 20</sup>

Used for (20#): Digestive<sup>01, 04, 07, 19, 20</sup>; Musculoskeletal<sup>03, 07</sup>; Respiratory<sup>03, 07</sup>; Skin<sup>01, 02, 04, 05, 09</sup>; Endocrine<sup>03</sup>; Pregnancy<sup>04</sup>;

General and Unspecified<sup>01, 03, 07, 14</sup>

Cognates:

Language contact:

***Abies* (Pinaceae)**

Spanish names:

Indigenous names: Yàg-Igàzh<sup>23</sup>

Used by (1\*): Zapotec<sup>23</sup>

Used for (1#): General and Unspecified<sup>23</sup>

Cognates:

Language contact:

***Abrus* (Fabaceae)**

Spanish names:

Indigenous names: Oxo<sup>09</sup>

Used by (1\*): Yucatecan Maya<sup>09</sup>

Used for (1#): Digestive<sup>09</sup>

Cognates:

Language contact:

***Abuta* (Menispermaceae)**

Spanish names:

Indigenous names:

Used by (2\*): Zoque<sup>03</sup>; Quichean Maya<sup>17</sup>

Used for (2#): Female genital<sup>03</sup>; nd<sup>17</sup>

Cognates:

Language contact:

***Abutilon* (Malvaceae)**

Spanish names:

Indigenous names: Hupchil ts'ohool, tsakam akich, tsakam kwinim ts'ohool, thak akich, thak ch'ohool<sup>07</sup>; Sakmisbil,

Sakpetmis<sup>09</sup>

Used by (2\*): Huastec<sup>07</sup>; Yucatecan Maya<sup>09</sup>

Used for (2#): Digestive<sup>07</sup>; Skin<sup>09</sup>

Cognates:

Language contact:

## **Acacia (Fabaceae)**

Spanish names: Alcornoque; Cacho de buey, cachito de toro; cacho de toro, cacho de buey, huizache; Cacho del toro; Cardo; Cornezuelo; Cornisuelo; Cornisuelo, cuerno; Espina de cacho, Cornisuelo; Espino blanco; Huisachi, espina blanca; Huizache; Jacarandillo blanco silvestre; Maroma; Timbre, guaje; Timbrillo blanco

Indigenous names: Mesit apij<sup>01</sup>; Juanapitx<sup>03</sup>; Juag aptx<sup>04</sup>; Tzut 'tzuu'n<sup>06</sup>; Xixit, waakal mo'eel, chak thuk<sup>07</sup>; Thobem, thobem k'iith, theben, ist'am toro, toro k'iith<sup>07</sup>; Thuhanoom, thujanum, thuhanib<sup>07</sup>; Uthuth te<sup>07</sup>; Ch'imay<sup>09</sup>; Waxim<sup>09</sup>; Subinche<sup>09</sup>; Seq' Jaqarant Aq'om<sup>12</sup>; Xe' subin ut xaq, Sub'in<sup>14</sup>; Ajsubin<sup>18</sup>; Sub'in<sup>19</sup>; Ixcanal<sup>19</sup>; Me' ja' te', xaxib, xaxib pukuj, vax te<sup>20</sup>; Guedxebej<sup>21</sup>; Guish guiatzj<sup>21</sup>; Yàg-guièts-yàaz, yàg-guièts-dà, yàg-guièts-ngõn<sup>23</sup>; Yàg-læ<sup>23</sup>; Yàg-guièts-clàv-nquìts, yàg-guièts-clàv-làs<sup>23</sup>; Huechachin<sup>28</sup>

Used by (15\*): Zoque<sup>01, 03</sup>; Mixe<sup>04</sup>; Totonac<sup>06</sup>; Huastec<sup>07</sup>; Yucatecan Maya<sup>09</sup>; Quichean Maya<sup>12, 14</sup>; Western Maya<sup>18, 19, 20</sup>; Zapotec<sup>21, 23</sup>; Nahua<sup>26, 28</sup>

Used for (68#): Digestive<sup>03, 06, 07, 09, 12, 20, 23, 26, 28</sup>; Eye<sup>03, 20</sup>; Ear<sup>07</sup>; Cardiovascular<sup>07</sup>; Musculoskeletal<sup>01, 06, 07, 12, 26</sup>; Neurological<sup>03, 07, 19, 28</sup>; Psychological<sup>26</sup>; Respiratory<sup>03, 07, 19, 20, 21, 26</sup>; Skin<sup>04, 07, 09, 14, 20, 21</sup>; Pregnancy<sup>01, 03, 07, 19, 23</sup>; Female genital<sup>03, 12, 18, 19, 21, 26</sup>;

Male genital<sup>12</sup>; General and Unspecified<sup>01, 03, 07, 19, 21, 23</sup>

Cognates: MZ: JuaC apitx; Zoq: apitx; CoreM: sub'in; WesM: sub'in;

Language contact: MZ > Zapo; Tot <> Hua; Huas <> Yuc <> Tzeltalan

## **Acaena (Rosaceae)**

Spanish names:

Indigenous names: Turumax<sup>20</sup>

Used by (1\*): Western Maya<sup>20</sup>

Used for (1#): Digestive<sup>20</sup>

Cognates:

Language contact:

## **Acalypha (Euphorbiaceae)**

Spanish names: Cola de gato; Contra araña; Corre chacalacca; Hierba de Cancer; Hierba de Cancer Hembra; Hierba de Cancer Macho; Hierba del cáncer; Hierba del cancer, hierba de mal de orín, hierba del gusano; Hierba del pastor; Tapón de burro

Indigenous names: Chi puk ay<sup>03</sup>; Ekchiñ poy cuy<sup>03</sup>; Tsuj mi ay<sup>03</sup>; Patsiit<sup>04</sup>; Čisšiši tuwan<sup>05</sup>; Tujuma'xanat<sup>06</sup>; Bohol ts'ohool, thuum ts'ohool, kakawate ts'ohool, xoko' ts'ohool, tsalam lat'em<sup>07</sup>; Tsak bohool ts'ohool, thuum ts'ohool tsakni<sup>07</sup>; Xmisbil, Mehenmis<sup>09</sup>; Ch'ilibtux il<sup>09</sup>; Sak pasmar xiw<sup>09</sup>; Ru xup Top, Sa'l Q'os<sup>12</sup>; Znajnoy<sup>13</sup>; Kilik Q'ehen<sup>14</sup>; Xley Ipek<sup>14</sup>; Contra ajtoy<sup>18</sup>

Used by (13\*): Zoque<sup>02, 03</sup>; Mixe<sup>04</sup>; Totonac<sup>05, 06</sup>; Huastec<sup>07</sup>; Yucatecan Maya<sup>09, 11</sup>; Quichean Maya<sup>12, 13, 14</sup>; Western Maya<sup>18</sup>; Nahua<sup>27</sup>

Used for (50#): Blood<sup>12</sup>; Digestive<sup>03, 06, 07, 09, 12, 13</sup>; Eye<sup>03</sup>; Musculoskeletal<sup>12, 13</sup>; Neurological<sup>03, 11</sup>; Respiratory<sup>14</sup>; Skin<sup>02, 03, 04, 05, 06, 07, 09, 11, 12, 13, 18, 27</sup>; Endocrine<sup>03, 07, 09</sup>; Urological<sup>06, 11, 12, 13</sup>; Pregnancy<sup>14, 27</sup>; Female genital<sup>12, 14</sup>; Male genital<sup>12</sup>; General and Unspecified<sup>07, 12, 14, 27</sup>

Cognates:

Language contact:

## **Acanthocereus (Cactaceae)**

Spanish names: Pitaya

Indigenous names: Xak'ub, tzatza<sup>07</sup>

Used by (2\*): Huastec<sup>07</sup>; Quichean Maya<sup>12</sup>

Used for (2#): Psychological<sup>12</sup>; Respiratory<sup>07</sup>

Cognates:

Language contact:

## **Achillea (Asteraceae)**

Spanish names: Milenrama; Milenrama, achileo, milefolio, yerba de los carpinteros, ala de pollo; Plumajillo

Indigenous names: Milenrama<sup>12</sup>; Ushic ek, satul upa kaj, alhucema, sutul uxe kaj, sutil uwi kaj, uje kuk, tzilil up kaj, cumate q'aies, solb'al uwi kaj<sup>13</sup>

Used by (5\*): Zoque<sup>03</sup>; Huastec<sup>08</sup>; Quichean Maya<sup>12, 13</sup>; Nahua<sup>25</sup>

Used for (22#): Digestive<sup>08, 12, 13</sup>; Ear<sup>13, 25</sup>; Cardiovascular<sup>08, 12, 13</sup>; Musculoskeletal<sup>03, 12, 13</sup>; Psychological<sup>12</sup>; Respiratory<sup>13</sup>; Skin<sup>12, 13</sup>; Endocrine<sup>13</sup>; Urological<sup>12, 13</sup>; Female genital<sup>12, 13</sup>; General and Unspecified<sup>12, 13</sup>

Cognates:

Language contact:

### ***Achimenes* (Gesneriaceae)**

Spanish names:

Indigenous names: Baq'nel pim<sup>14</sup>

Used by (2\*): Zoque<sup>03</sup>; Quichean Maya<sup>14</sup>

Used for (4#): Skin<sup>03</sup>; Pregnancy<sup>03</sup>; Female genital<sup>03</sup>; General and Unspecified<sup>14</sup>

Cognates:

Language contact:

### ***Achyranthes* (Amaranthaceae)**

Spanish names:

Indigenous names: Ts'aah pathaam, lek'ab mitsu', tsakam pathaam akw'aal, itsik mitsu', itsaan an patham, akw'aalil pathaam, path ts'ohool<sup>07</sup>; Bayche<sup>09</sup>

Used by (2\*): Huastec<sup>07</sup>; Yucatecan Maya<sup>09</sup>

Used for (2#): Digestive<sup>09</sup>; Skin<sup>07</sup>

Cognates:

Language contact:

### ***Acmella* (Asteraceae)**

Spanish names: Orozuz

Indigenous names: Niwi sotyi<sup>03</sup>

Used by (2\*): Zoque<sup>03</sup>; Yucatecan Maya<sup>10</sup>

Used for (2#): Neurological<sup>03</sup>; Respiratory<sup>10</sup>

Cognates:

Language contact:

### ***Acnistus* (Solanaceae)**

Spanish names:

Indigenous names: K'apaj, Ka'a pajl<sup>14</sup>

Used by (1\*): Quichean Maya<sup>14</sup>

Used for (2#): Digestive<sup>14</sup>; General and Unspecified<sup>14</sup>

Cognates:

Language contact:

### ***Acosmium* (Fabaceae)**

Spanish names: Guayacán; Huayacan

Indigenous names: Putsy takin<sup>01</sup>; Tzus kuy<sup>02</sup>; Sam cuy<sup>03</sup>; Nøøtxk<sup>04</sup>; K'a che<sup>17</sup>; Guassi<sup>21</sup>

Used by (8\*): Zoque<sup>01, 02, 03</sup>; Mixe<sup>04</sup>; Yucatecan Maya<sup>10</sup>; Quichean Maya<sup>17</sup>; Zapotec<sup>21</sup>; Nahuatl<sup>26</sup>

Used for (28#): Blood<sup>02, 03</sup>; Digestive<sup>01, 02, 03, 04, 10</sup>; Musculoskeletal<sup>03, 21</sup>; Respiratory<sup>01, 03, 04</sup>; Skin<sup>03</sup>; Endocrine<sup>01, 02, 03</sup>;

Urological<sup>03</sup>; Pregnancy<sup>02, 03</sup>; Female genital<sup>03, 04, 21</sup>; General and Unspecified<sup>02, 03, 04, 21, 26</sup>; nd<sup>17</sup>

Cognates:

Language contact:

### ***Acourtia* (Asteraceae)**

Spanish names: Valeriana; Valeriana roja/de cerro

Indigenous names: Guizh-zhīil-dán<sup>23</sup>

Used by (3\*): Quichean Maya<sup>12</sup>; Western Maya<sup>19</sup>; Zapotec<sup>23</sup>

Used for (8#): Musculoskeletal<sup>19</sup>; Neurological<sup>19</sup>; Psychological<sup>12, 19</sup>; Skin<sup>23</sup>; Pregnancy<sup>19</sup>; Female genital<sup>19</sup>; General and Unspecified<sup>19</sup>

Cognates:

Language contact:

### ***Acrocomia* (Arecaceae)**

Spanish names: Cocoyol; Coyal; Coyole

Indigenous names: Kuma<sup>02</sup>; Cuma<sup>03</sup>; Kum<sup>04</sup>; Maap<sup>07</sup>; Biga'aj<sup>21</sup>

Used by (6\*): Zoque<sup>01, 02, 03</sup>; Mixe<sup>04</sup>; Huastec<sup>07</sup>; Zapotec<sup>21</sup>

Used for (9#): Blood<sup>03</sup>; Digestive<sup>02, 03, 04, 21</sup>; Respiratory<sup>07</sup>; Endocrine<sup>01</sup>; Pregnancy<sup>07</sup>; General and Unspecified<sup>21</sup>

Cognates: MZ: kum; Zoq: kuma;

Language contact:

### ***Adelobotrys* (Melastomataceae)**

Spanish names:

Indigenous names: Chunac kejen<sup>16</sup>; Chunahak k'ejen<sup>17</sup>

Used by (2\*): Quichean Maya<sup>16, 17</sup>

Used for (2#): Neurological<sup>16</sup>; nd<sup>17</sup>

Cognates:

Language contact:

### ***Adenophyllum* (Asteraceae)**

Spanish names: Cempasúchil del monte/ ruda del monte; Flor de calandria

Indigenous names: Guibiguadajni, zamposuche guesxi<sup>21</sup>

Used by (2\*): Zoque<sup>02</sup>; Zapotec<sup>21</sup>

Used for (9#): Digestive<sup>02, 21</sup>; Eye<sup>21</sup>; Ear<sup>02</sup>; Musculoskeletal<sup>02</sup>; Psychological<sup>21</sup>; Respiratory<sup>21</sup>; Skin<sup>21</sup>; General and Unspecified<sup>21</sup>

Cognates:

Language contact:

### ***Adiantopsis* (Pteridaceae)**

Spanish names:

Indigenous names: Kaxam<sup>07</sup>

Used by (1\*): Huastec<sup>07</sup>

Used for (1#): General and Unspecified<sup>07</sup>

Cognates:

Language contact:

### ***Adiantum* (Pteridaceae)**

Spanish names: Cilantrillo; Colandrillo; Culantrillo; Culantrillo de pozo; Pata de Clarinero

Indigenous names: Tek piixi tek<sup>04</sup>; Akan pich, akan ts'ok, akan hooch, chalam ha<sup>07</sup>; Akan pich, lapis ts'ohool<sup>07</sup>; Akan pich<sup>07</sup>;

Culanto ch'o, coq' xip, uwi ja, uwi siwan, uklanto siwan<sup>13</sup>; Roq' Chi'wan<sup>14</sup>; Colantra pim<sup>16</sup>; Roq chit cuan<sup>16</sup>; Ruj i rak'aj tza<sup>16</sup>;

Sis'bi pim<sup>17</sup>; Ru'j i rak' aj tza<sup>17</sup>; Ecahuile<sup>24</sup>

Used by (11\*): Zoque<sup>01, 03</sup>; Mixe<sup>04</sup>; Huastec<sup>07</sup>; Quichean Maya<sup>12, 13, 14, 16, 17</sup>; Zapotec<sup>21</sup>; Nahua<sup>24</sup>

Used for (38#): Digestive<sup>03, 12, 14</sup>; Cardiovascular<sup>07</sup>; Neurological<sup>01, 07, 14, 16</sup>; Psychological<sup>12, 16</sup>; Respiratory<sup>12, 13</sup>; Skin<sup>12</sup>;

Urological<sup>01, 12, 21</sup>; Pregnancy<sup>07, 13, 24</sup>; Female genital<sup>03, 04, 12</sup>; General and Unspecified<sup>07, 12, 13, 16</sup>; nd<sup>17</sup>

Cognates: Quich: (roq) siwan / chiwan / chitcuan;

Language contact: Mixe <> Hua

### ***Aechmea* (Bromeliaceae)**

Spanish names: Ixtle; Kardon

Indigenous names: Ñiauing<sup>03</sup>; K'ok'om, k'ok'om wits, ok'lom te<sup>07</sup>; Ch'uk, Cinta k'uk<sup>09</sup>

Used by (3\*): Zoque<sup>03</sup>; Huastec<sup>07</sup>; Yucatecan Maya<sup>09</sup>

Used for (11#): Digestive<sup>03, 07</sup>; Eye<sup>07</sup>; Ear<sup>03</sup>; Neurological<sup>07</sup>; Urological<sup>03</sup>; Pregnancy<sup>03, 09</sup>; Female genital<sup>03</sup>; General and Unspecified<sup>07</sup>

Cognates: Maya: k'ok/k'uk;

Language contact:

### ***Aegiphila* (Lamiaceae)**

Spanish names:

Indigenous names: MꞤa ay<sup>03</sup>; Rok' xaa'n<sup>17</sup>

Used by (3\*): Zoque<sup>03</sup>; Quichean Maya<sup>16, 17</sup>

Used for (4#): Musculoskeletal<sup>03</sup>; Neurological<sup>16</sup>; Female genital<sup>03</sup>; nd<sup>17</sup>

Cognates:

Language contact:

### ***Aeschynomene* (Fabaceae)**

Spanish names: Dormilona

Indigenous names: Salat-ik<sup>09</sup>

Used by (2\*): Zoque<sup>01</sup>; Yucatecan Maya<sup>09</sup>

Used for (2#): Skin<sup>09</sup>; General and Unspecified<sup>01</sup>

Cognates:

Language contact:

### ***Agarista* (Ericaceae)**

Spanish names:

Indigenous names: Unuk tyiñcuy<sup>03</sup>

Used by (1\*): Zoque<sup>03</sup>

Used for (3#): Respiratory<sup>03</sup>; Skin<sup>03</sup>; Female genital<sup>03</sup>

Cognates:

Language contact:

### ***Agastache* (Lamiaceae)**

Spanish names: Toronjil

Indigenous names:

Used by (3\*): Totonac<sup>06</sup>; Nahua<sup>25, 26</sup>

Used for (6#): Digestive<sup>06</sup>; Neurological<sup>25</sup>; Psychological<sup>06</sup>; Respiratory<sup>26</sup>; Female genital<sup>06, 26</sup>

Cognates:

Language contact:

### ***Agave* (Asparagaceae)**

Spanish names: Maguecillo; Maguey; Maguey del cerro

Indigenous names: O<sup>01</sup>; Xa<sup>04</sup>; Weey, tsi'iim, thak book<sup>07</sup>; Sajkiy<sup>12</sup>; Sukchij<sup>19</sup>; Dobala'a<sup>21</sup>; Dohb<sup>22</sup>; Dòb-pcuêl, dòb-zân<sup>23</sup>

Used by (12\*): Zoque<sup>01, 03</sup>; Mixe<sup>04</sup>; Huastec<sup>07</sup>; Yucatecan Maya<sup>09</sup>; Quichean Maya<sup>12</sup>; Western Maya<sup>19</sup>; Zapotec<sup>21, 22, 23</sup>; Nahua<sup>25, 27</sup>

Used for (31#): Digestive<sup>12</sup>; Cardiovascular<sup>25</sup>; Musculoskeletal<sup>23, 25</sup>; Neurological<sup>25</sup>; Psychological<sup>12</sup>; Respiratory<sup>07, 21</sup>; Skin<sup>01, 03, 07, 12, 19, 21, 23, 25, 27</sup>; Urological<sup>12</sup>; Pregnancy<sup>04, 07, 09, 19, 22, 23, 25</sup>; Female genital<sup>19</sup>; General and Unspecified<sup>07, 12, 21, 22, 25</sup>

Cognates: CoreM: sajkiy/sukchij; Zap: dob;

Language contact:

### ***Agdestis* (Phytolaccaceae)**

Spanish names: Suelda consuelda

Indigenous names: Yokya poj/ päksy<sup>02</sup>; Tuuwi', ix tuuwi', thak huchuk, thuyum<sup>07</sup>

Used by (2\*): Zoque<sup>02</sup>; Huastec<sup>07</sup>

Used for (4#): Musculoskeletal<sup>02, 07</sup>; Skin<sup>07</sup>; General and Unspecified<sup>07</sup>

Cognates:

Language contact:

### ***Ageratina* (Asteraceae)**

Spanish names: Hierba de angerl; Yerba de culebra/ aigre

Indigenous names: K'anim mim<sup>08</sup>; Sakil ch'a te', xuch'il vomol<sup>20</sup>; Pom ch'a te', ox yoket vomol<sup>20</sup>; Škwam bäl<sup>22</sup>; Yàg-bdiin, guìzh-bdiin, guìzh-zhwèè<sup>23</sup>; Guìzh-rquíá-yàn<sup>23</sup>

Used by (4\*): Huastec<sup>08</sup>; Western Maya<sup>20</sup>; Zapotec<sup>22, 23</sup>

Used for (18#): Digestive<sup>20</sup>; Eye<sup>22</sup>; Ear<sup>20</sup>; Musculoskeletal<sup>22</sup>; Neurological<sup>08, 22</sup>; Respiratory<sup>20, 23</sup>; Skin<sup>20, 22</sup>; Pregnancy<sup>20</sup>; General and Unspecified<sup>20, 22, 23</sup>

Cognates:

Language contact:

### ***Ageratum* (Asteraceae)**

Spanish names: Hierba santa cimarrón; Mejorana; Mejorana, pericón morado; Mostranzo

Indigenous names: Taam ujts<sup>04</sup>; Xpasmal xiw<sup>09</sup>; Ya'atzan Pamaj Q'os<sup>12</sup>; Lok' ab' winq<sup>14</sup>; Xab'on Q'ehen<sup>14</sup>; Lok' ab' ixq<sup>14</sup>; Tlanecpaquelite<sup>26</sup>

Used by (7\*): Mixe<sup>04</sup>; Yucatecan Maya<sup>09</sup>; Quichean Maya<sup>12, 13, 14</sup>; Nahuatl<sup>25, 26</sup>

Used for (22#): Digestive<sup>04, 09, 12, 14</sup>; Neurological<sup>12</sup>; Respiratory<sup>12, 13, 14</sup>; Skin<sup>04, 12, 13, 25, 26</sup>; Endocrine<sup>12</sup>; Female genital<sup>14</sup>; General and Unspecified<sup>12, 14</sup>

Cognates: CoreM: pa(s)ma;

Language contact:

### ***Agrimonia* (Rosaceae)**

Spanish names:

Indigenous names:

Used by (1\*): Quichean Maya<sup>13</sup>

Used for (2#): Digestive<sup>13</sup>; Skin<sup>13</sup>

Cognates:

Language contact:

### ***Albizia* (Fabaceae)**

Spanish names:

Indigenous names: Thukiim<sup>07</sup>

Used by (1\*): Huastec<sup>07</sup>

Used for (1#): General and Unspecified<sup>07</sup>

Cognates:

Language contact:

### ***Alcea* (Malvaceae)**

Spanish names:

Indigenous names: Guièè-màrpól-nquìts<sup>23</sup>

Used by (1\*): Zapotec<sup>23</sup>

Used for (1#): Respiratory<sup>23</sup>

Cognates:

Language contact:

### ***Alchemilla* (Rosaceae)**

Spanish names:

Indigenous names:

Used by (1\*): Quichean Maya<sup>13</sup>

Used for (1#): Digestive<sup>13</sup>

Cognates:

Language contact:

### ***Alchornea* (Euphorbiaceae)**

Spanish names: Marangola, cacahuatillo

Indigenous names: Tuwax'katat, liihpatat<sup>06</sup>

Used by (1\*): Totonac<sup>06</sup>

Used for (2#): Endocrine<sup>06</sup>; General and Unspecified<sup>06</sup>

Cognates:

Language contact:

### ***Aldama* (Asteraceae)**

Spanish names: Escutumbul

Indigenous names: K'an wits, mataablom<sup>07</sup>; Escutumbul<sup>18</sup>

Used by (2\*): Huastec<sup>07</sup>; Western Maya<sup>18</sup>

Used for (3#): Respiratory<sup>07</sup>; Skin<sup>07</sup>; Endocrine<sup>18</sup>

Cognates:

Language contact:

### ***Alibertia* (Rubiaceae)**

Spanish names: Catarita; Marimbola

Indigenous names: Wikpak<sup>03</sup>; Shbola bishulu<sup>21</sup>

Used by (2\*): Zoque<sup>03</sup>; Zapotec<sup>21</sup>

Used for (4#): Psychological<sup>03</sup>; Respiratory<sup>03</sup>; General and Unspecified<sup>03, 21</sup>

Cognates:

Language contact:

### ***Allium* (Amaryllidaceae)**

Spanish names: Ajo; Cebolla; Cebollín

Indigenous names: Tzapaas ceullas/tsepolas<sup>01</sup>; Asyus<sup>01</sup>; Asyus<sup>02</sup>; Antuxk<sup>04</sup>; A'xux<sup>06</sup>; Akat'sasna<sup>06</sup>; Huun nakat, chuun nakat, xuun nakat<sup>07</sup>; Aaxux<sup>07</sup>; Thobollash dhoboyax<sup>08</sup>; Axu'x<sup>13</sup>; Ceboy<sup>13</sup>; Axux<sup>20</sup>; Ceboy, cebul<sup>21</sup>; Aaxoj<sup>21</sup>; Žiht<sup>22</sup>; Nlěch, nsùch<sup>23</sup>

Used by (17\*): Zoque<sup>01, 02, 03</sup>; Mixe<sup>04</sup>; Totonac<sup>06</sup>; Huastec<sup>07, 08</sup>; Yucatecan Maya<sup>09</sup>; Quichean Maya<sup>12, 13, 14</sup>; Western Maya<sup>19, 20</sup>; Zapotec<sup>21, 22, 23</sup>; Nahuatl<sup>25</sup>

Used for (114#): Digestive<sup>01, 02, 03, 06, 07, 08, 12, 13, 19, 20, 21</sup>; Eye<sup>02, 21</sup>; Ear<sup>04, 06, 13</sup>; Cardiovascular<sup>01, 12, 13, 19</sup>; Musculoskeletal<sup>01, 02, 03, 06, 07, 08, 13, 14, 21, 25</sup>; Neurological<sup>01, 02, 08, 09, 13, 21</sup>; Psychological<sup>01, 03, 06, 19</sup>; Respiratory<sup>01, 02, 03, 06, 08, 12, 14, 19, 21</sup>; Skin<sup>01, 02, 03, 04, 07, 08, 13, 14, 19, 21, 25</sup>; Endocrine<sup>03, 08</sup>; Urological<sup>02, 03</sup>; Pregnancy<sup>03, 09, 13, 22</sup>; Female genital<sup>02, 09</sup>; Male genital<sup>02, 03</sup>; General and Unspecified<sup>01, 02, 04, 06, 07, 12, 13, 14, 19, 20, 21, 23</sup>

Cognates:

Language contact:

### ***Alloispermum* (Asteraceae)**

Spanish names: Flor de estrella

Indigenous names: Ma'atza jäyá<sup>01</sup>; K'oxox chij<sup>20</sup>

Used by (2\*): Zoque<sup>01</sup>; Western Maya<sup>20</sup>

Used for (2#): Digestive<sup>20</sup>; General and Unspecified<sup>01</sup>

Cognates:

Language contact:

### ***Allophylus* (Sapindaceae)**

Spanish names:

Indigenous names: Katxu aay<sup>03</sup>

Used by (2\*): Zoque<sup>03</sup>; Yucatecan Maya<sup>09</sup>

Used for (2#): Skin<sup>03, 09</sup>

Cognates:

Language contact:

### ***Allosidastrum* (Malvaceae)**

Spanish names:

Indigenous names: T'unu' ix bek'em<sup>07</sup>

Used by (1\*): Huastec<sup>07</sup>

Used for (1#): Pregnancy<sup>07</sup>

Cognates:

Language contact:

### ***Alnus* (Betulaceae)**

Spanish names: Aliso; Avedul; Avedul rojo

Indigenous names: Lama<sup>12</sup>; Lemob<sup>13</sup>; Elite, ilite<sup>26</sup>

Used by (3\*): Quichean Maya<sup>12, 13</sup>; Nahua<sup>26</sup>

Used for (18#): Digestive<sup>12</sup>; Cardiovascular<sup>12</sup>; Musculoskeletal<sup>12, 13</sup>; Skin<sup>12</sup>; Urological<sup>12</sup>; Pregnancy<sup>13</sup>; Female genital<sup>12</sup>; Male genital<sup>12</sup>; General and Unspecified<sup>12, 26</sup>

Cognates: Quich: lama/lemob;

Language contact:

### ***Aloe* (Xanthorrhoeaceae)**

Spanish names: Sábila; Sávila; Zabila

Indigenous names: Xabila<sup>07</sup>; Petk'inki<sup>09</sup>; Pimki<sup>13</sup>; Tujtuj sukchij<sup>19</sup>; Dòb-xti<sup>23</sup>

Used by (17\*): Zoque<sup>01, 02, 03</sup>; Mixe<sup>04</sup>; Huastec<sup>07, 08</sup>; Yucatecan Maya<sup>09, 11</sup>; Quichean Maya<sup>12, 13, 14</sup>; Western Maya<sup>18, 19</sup>; Zapotec<sup>21, 23</sup>; Nahua<sup>25, 27</sup>

Used for (89#): Blood<sup>01, 02, 12, 18</sup>; Digestive<sup>01, 02, 03, 08, 12, 13, 18, 19, 21, 23, 25</sup>; Eye<sup>02, 27</sup>; Cardiovascular<sup>01, 02, 21</sup>; Musculoskeletal<sup>01, 02, 03, 08, 12, 13, 18, 19, 21, 27</sup>; Neurological<sup>08, 18, 19, 25</sup>; Psychological<sup>11, 12</sup>; Respiratory<sup>01, 02, 03, 04, 09, 13, 18, 21, 23, 25, 27</sup>; Skin<sup>01, 02, 03, 04, 07, 08, 09, 11, 12, 13, 14, 18, 19, 21, 23, 25, 27</sup>; Endocrine<sup>08, 13, 18, 25, 27</sup>; Urological<sup>01, 03, 12, 13, 18, 23</sup>; Female genital<sup>01, 03, 12</sup>; Male genital<sup>12</sup>; General and Unspecified<sup>01, 03, 08, 12, 13, 18, 19, 21, 23, 25</sup>

Cognates:

Language contact:

### ***Alophia* (Iridaceae)**

Spanish names:

Indigenous names: Tsakam apats, tsak apats<sup>07</sup>

Used by (1\*): Huastec<sup>07</sup>

Used for (1#): Digestive<sup>07</sup>

Cognates:

Language contact:

### ***Aloysia* (Verbenaceae)**

Spanish names: Cedron; Cedrón, Maria Luisa; Hierba luisa

Indigenous names: Bänälä luisa<sup>18</sup>

Used by (3\*): Quichean Maya<sup>12</sup>; Western Maya<sup>18</sup>; Zapotec<sup>22</sup>

Used for (12#): Blood<sup>12</sup>; Digestive<sup>12, 22</sup>; Cardiovascular<sup>12</sup>; Neurological<sup>12</sup>; Psychological<sup>12, 22</sup>; Respiratory<sup>12</sup>; Skin<sup>12</sup>; General and Unspecified<sup>12, 18, 22</sup>

Cognates:

Language contact:

### ***Alternanthera* (Amaranthaceae)**

Spanish names: Golondrina

Indigenous names: Wiichab ts'ohool, wiichab maal, pulik wichab<sup>07</sup>; Tiyankix pepetal, ehtiiil tsakam wichab<sup>07</sup>; Tan wamal<sup>20</sup>; Guizh-guidzdán, guizh-yù, guizh-guiët-nì, guizh-zhàn-nì<sup>23</sup>; Tiangispepetl<sup>26</sup>

Used by (4\*): Huastec<sup>07</sup>; Western Maya<sup>20</sup>; Zapotec<sup>23</sup>; Nahua<sup>26</sup>

Used for (13#): Digestive<sup>07, 20, 23, 26</sup>; Neurological<sup>26</sup>; Respiratory<sup>26</sup>; Skin<sup>07, 26</sup>; General and Unspecified<sup>07, 23, 26</sup>

Cognates:

Language contact:



### ***Alvaradoa* (Picramniaceae)**

Spanish names: Palo de hormigas; Plumajillo

Indigenous names: Belsinikche<sup>09</sup>; Tzutuzula<sup>11</sup>; Chi'karar te<sup>19</sup>

Used by (3\*): Yucatecan Maya<sup>09, 11</sup>; Western Maya<sup>19</sup>

Used for (4#): Skin<sup>09, 11, 19</sup>; General and Unspecified<sup>11</sup>

Cognates:

Language contact:

### ***Amaranthus* (Amaranthaceae)**

Spanish names: Bledo; Bledo, Amaranato; Espina; Espina de borrego; Pie de paloma roja; Quintonil; Quintonil espinoso

Indigenous names: Tu'kun calx'tunit<sup>06</sup>; Chith, lek'ab tooro<sup>07</sup>; Chithal tooro, he'pan, chital ist'amaal, waho ts'ohool, alte'

chith<sup>07</sup>; Tez<sup>13</sup>; Nagucho'o<sup>21</sup>; Guedxe'e<sup>21</sup>; Guizbae<sup>23</sup>

Used by (9\*): Zoque<sup>01, 02, 03</sup>; Totonac<sup>06</sup>; Huastec<sup>07</sup>; Quichean Maya<sup>12, 13</sup>; Zapotec<sup>21, 23</sup>

Used for (14#): Blood<sup>13</sup>; Digestive<sup>01, 07, 23</sup>; Cardiovascular<sup>12</sup>; Musculoskeletal<sup>02</sup>; Skin<sup>07</sup>; Urological<sup>06</sup>; Female genital<sup>03</sup>;

General and Unspecified<sup>01, 06, 07, 21</sup>

Cognates:

Language contact:

### ***Ambrosia* (Asteraceae)**

Spanish names: Altamís; Artemis; Hierba del perro, altamisa, hierba de las señoras

Indigenous names:

Used by (4\*): Mixe<sup>04</sup>; Western Maya<sup>19, 20</sup>; Nahua<sup>26</sup>

Used for (6#): Digestive<sup>19, 20</sup>; Musculoskeletal<sup>04, 19</sup>; Female genital<sup>26</sup>; General and Unspecified<sup>19</sup>

Cognates:

Language contact:

### ***Ampelocissus* (Vitaceae)**

Spanish names:

Indigenous names: Kamuuxy<sup>04</sup>

Used by (1\*): Mixe<sup>04</sup>

Used for (1#): Eye<sup>04</sup>

Cognates:

Language contact:

### ***Amphilophium* (Bignoniaceae)**

Spanish names:

Indigenous names: Lalab uthu', ch'ichaabil uthu, t'uu ch'aah<sup>07</sup>; Sit'macho, Petak<sup>09</sup>; Soski-ak', Xdunt'-ak<sup>09</sup>; Xache'ma'ax, Xache'xnuuk<sup>09</sup>

Used by (2\*): Huastec<sup>07</sup>; Yucatecan Maya<sup>09</sup>

Used for (5#): Digestive<sup>09</sup>; Skin<sup>07, 09</sup>

Cognates:

Language contact:

### ***Amphipterygium* (Anacardiaceae)**

Spanish names: Cuachalala; Cuachalalate; Cuachinala; Guachalalate

Indigenous names: Kuy tupsy<sup>02</sup>; Ya'guiaj<sup>21</sup>

Used by (5\*): Zoque<sup>02, 03</sup>; Zapotec<sup>21, 22</sup>; Nahua<sup>27</sup>

Used for (20#): Blood<sup>21</sup>; Digestive<sup>02, 21, 22, 27</sup>; Cardiovascular<sup>02</sup>; Musculoskeletal<sup>21</sup>; Skin<sup>02, 22, 27</sup>; Endocrine<sup>27</sup>; Urological<sup>27</sup>;

Pregnancy<sup>02, 03</sup>; Female genital<sup>02, 03, 21</sup>; General and Unspecified<sup>02, 21, 27</sup>

Cognates:

Language contact:

### ***Amphitecna* (Bignoniaceae)**

Spanish names: Jicara del duende

Indigenous names: Makti jeepe<sup>03</sup>; Cuacotecamatl, tecomate<sup>26</sup>

Used by (2\*): Zoque<sup>03</sup>; Nahua<sup>26</sup>

Used for (3#): Psychological<sup>03</sup>; Respiratory<sup>26</sup>; Endocrine<sup>26</sup>

Cognates:

Language contact:

### ***Anacardium* (Anacardiaceae)**

Spanish names: Jocote de marañon, anacardo, alcyoiba; Marañon

Indigenous names: Q'inóm<sup>13</sup>

Used by (3\*): Mixe<sup>04</sup>; Quichean Maya<sup>13</sup>; Western Maya<sup>19</sup>

Used for (3#): Digestive<sup>13, 19</sup>; Skin<sup>04</sup>

Cognates:

Language contact:

### ***Anagallis* (Primulaceae)**

Spanish names:

Indigenous names: Yax chel<sup>20</sup>; Ncuàan-dzéb-còràl<sup>23</sup>; Nequixaniti<sup>26</sup>

Used by (3\*): Western Maya<sup>20</sup>; Zapotec<sup>23</sup>; Nahua<sup>26</sup>

Used for (4#): Digestive<sup>20</sup>; Musculoskeletal<sup>26</sup>; Skin<sup>26</sup>; General and Unspecified<sup>23</sup>

Cognates:

Language contact:

### ***Ananas* (Bromeliaceae)**

Spanish names: Piña

Indigenous names: Tzik witz<sup>01</sup>; Uj'uj/tzikuy<sup>02</sup>; Uuju<sup>03</sup>; Aa'caa'xca<sup>06</sup>; Chabcham wits<sup>07</sup>

Used by (8\*): Zoque<sup>01, 02, 03</sup>; Totonac<sup>06</sup>; Huastec<sup>07</sup>; Quichean Maya<sup>12</sup>; Western Maya<sup>18</sup>; Zapotec<sup>21</sup>

Used for (17#): Digestive<sup>02, 06, 07, 12, 21</sup>; Musculoskeletal<sup>01</sup>; Neurological<sup>18</sup>; Endocrine<sup>06, 18</sup>; Urological<sup>01, 02, 06, 12</sup>; Female genital<sup>01, 02</sup>; General and Unspecified<sup>03, 21</sup>

Cognates: Zoq: tzik/uju;

Language contact:

### ***Andira* (Fabaceae)**

Spanish names: Lombricero

Indigenous names: Ma'aka kuy<sup>02</sup>; Maka<sup>03</sup>; Tsukiñi cuy<sup>03</sup>; lixy<sup>04</sup>; Ngaash<sup>21</sup>

Used by (4\*): Zoque<sup>02, 03</sup>; Mixe<sup>04</sup>; Zapotec<sup>21</sup>

Used for (6#): Digestive<sup>02, 21</sup>; Skin<sup>03</sup>; General and Unspecified<sup>04, 21</sup>

Cognates: Zoq: maka;

Language contact:

### ***Anechites* (Apocynaceae)**

Spanish names: Lagartija

Indigenous names: Putzi ay<sup>01</sup>

Used by (1\*): Zoque<sup>01</sup>

Used for (1#): Skin<sup>01</sup>

Cognates:

Language contact:

### ***Anemia* (Anemiaceae)**

Spanish names:

Indigenous names: Nø' ømo pøh<sup>04</sup>; Huniil akam pich, chalam ha<sup>07</sup>; Boo'wat ts'ohool<sup>07</sup>

Used by (2\*): Mixe<sup>04</sup>; Huastec<sup>07</sup>

Used for (3#): Female genital<sup>04</sup>; General and Unspecified<sup>07</sup>

Cognates:

Language contact:

### ***Anemopaegma* (Bignoniaceae)**

Spanish names:

Indigenous names: Guatimal<sup>03</sup>

Used by (1\*): Zoque<sup>03</sup>

Used for (1#): Female genital<sup>03</sup>

Cognates:

Language contact:

### ***Anethum* (Apiaceae)**

Spanish names: Eneldito/ eneldo; Eneldo

Indigenous names: Neeld<sup>21</sup>; Guìzh-nêld<sup>23</sup>

Used by (8\*): Zoque<sup>01, 02, 03</sup>; Mixe<sup>04</sup>; Quichean Maya<sup>12, 13</sup>; Zapotec<sup>21, 23</sup>

Used for (21#): Digestive<sup>01, 02, 03, 04, 12, 13, 21</sup>; Cardiovascular<sup>12</sup>; Musculoskeletal<sup>02</sup>; Neurological<sup>12, 21</sup>; Psychological<sup>02, 12</sup>; Respiratory<sup>23</sup>; Skin<sup>21</sup>; Pregnancy<sup>03</sup>; Female genital<sup>02, 03, 13</sup>; General and Unspecified<sup>12, 21</sup>

Cognates:

Language contact:

### ***Angelica* (Apiaceae)**

Spanish names: Angélica Macho/ hembra

Indigenous names: Tz'olaj B'aq Aqom<sup>12</sup>

Used by (1\*): Quichean Maya<sup>12</sup>

Used for (5#): Digestive<sup>12</sup>; Cardiovascular<sup>12</sup>; Musculoskeletal<sup>12</sup>; Psychological<sup>12</sup>; General and Unspecified<sup>12</sup>

Cognates:

Language contact:

### ***Anisacanthus* (Acanthaceae)**

Spanish names:

Indigenous names: Gubedundh<sup>22</sup>

Used by (1\*): Zapotec<sup>22</sup>

Used for (2#): Digestive<sup>22</sup>; General and Unspecified<sup>22</sup>

Cognates:

Language contact:

## ***Annona* (Annonaceae)**

Spanish names: Anona; Anona ; Anona (fría); Anona blanca; Candón; Caramuyo; Chirimoya; Condon, piñon anona; Guanabana; Ilama; Popause; Saramuyo

Indigenous names: (Pakak) yati<sup>01</sup>; Apak yati/katzu yati<sup>01</sup>; Yati<sup>01</sup>; Pasyte yati<sup>02</sup>; Yati<sup>02</sup>; Kopak yati<sup>02</sup>; Katx yati<sup>03</sup>; Kotsak yati<sup>03</sup>; Jon yati<sup>03</sup>; Guayaban aay<sup>04</sup>; Noajy aky<sup>04</sup>; Kilpu'jaka, a'xit kiwi<sup>05</sup>; Akçit kiwi<sup>05</sup>; A'cchit<sup>06</sup>; Aanchuuch, kukayil an chuch, ts'een kukay, ts'aale an chuch, bekal tsuts, tsakam kukay<sup>07</sup>; Kukay, tsak kukay<sup>07</sup>; Ahakte', kukay<sup>07</sup>; Ts'almuy<sup>09</sup>; Oop<sup>09</sup>; Oop Čuhum<sup>10</sup>; Pek' Aq'om<sup>12</sup>; K'uwx<sup>13</sup>; Holobob<sup>17</sup>; Tz'umuy<sup>18</sup>; Ajpox<sup>18</sup>; K'ewex<sup>20</sup>; Balagahuanabana'a<sup>21</sup>; Guele bajna'a<sup>21</sup>; Guelebidxu'u<sup>21</sup>

Used by (17\*): Zoque<sup>01, 02, 03</sup>; Mixe<sup>04</sup>; Totonac<sup>05, 06</sup>; Huastec<sup>07</sup>; Yucatecan Maya<sup>09, 10, 11</sup>; Quichean Maya<sup>12, 13, 17</sup>; Western Maya<sup>18, 20</sup>; Zapotec<sup>21</sup>; Nahua<sup>25</sup>

Used for (104#): Blood<sup>02</sup>; Digestive<sup>01, 02, 03, 04, 05, 06, 07, 09, 12, 13, 18, 20, 21, 25</sup>; Cardiovascular<sup>01, 02, 06</sup>; Musculoskeletal<sup>01, 02, 04, 11, 12, 13, 21</sup>; Neurological<sup>02, 11, 13</sup>; Psychological<sup>01, 02, 12, 21</sup>; Respiratory<sup>01, 02, 03, 07, 09, 12, 13</sup>; Skin<sup>02, 03, 05, 06, 07, 09, 10, 13, 21</sup>; Endocrine<sup>01, 02</sup>; Urological<sup>01, 02, 07, 12</sup>; Pregnancy<sup>02, 03</sup>; Female genital<sup>01, 03, 21</sup>; Male genital<sup>02</sup>; Social problems<sup>07</sup>; General and Unspecified<sup>01, 02, 03, 04, 07, 09, 10, 11, 12, 13, 18, 21</sup>; nd<sup>17</sup>

Cognates: MZ: aCi; Zoq: yati; Tot: akchit; CoreM: k'cwex; Yuc: oop;

Language contact: MZ > Tot <> Hua; Tot <> CoreM; Yuc > Kekchí

## ***Anoda* (Malvaceae)**

Spanish names: Halaches, flor morada, zoquixochit; Malvavisca; Violeta; Violeta; Violeta, violete silvestre

Indigenous names: Bakan ts'ohool, tsakam bok'ool ts'ohool<sup>07</sup>; Muu ts'ojo<sup>08</sup>; Guizh-quês, xín-mâlb<sup>23</sup>

Used by (7\*): Totonac<sup>06</sup>; Huastec<sup>07, 08</sup>; Quichean Maya<sup>13</sup>; Zapotec<sup>23</sup>; Nahua<sup>25, 26</sup>

Used for (19#): Digestive<sup>07, 08, 25</sup>; Neurological<sup>07</sup>; Respiratory<sup>08, 26</sup>; Skin<sup>07, 08, 13, 23</sup>; Endocrine<sup>07</sup>; Urological<sup>06, 08, 25</sup>; Pregnancy<sup>06</sup>; Female genital<sup>06</sup>; General and Unspecified<sup>07, 08, 13</sup>

Cognates:

Language contact:

## ***Anredera* (Basellaceae)**

Spanish names: Hoja de azar hembra; ledra; Omisal; Suela con suela; Suelda consuelda; Suelda consuelda, camote que huele feo

Indigenous names: Tza'a tzoj<sup>01</sup>; Pak tyoopi<sup>03</sup>; Omisal<sup>06</sup>; Ix tuyuum, thuyum<sup>07</sup>; Kaxichel<sup>09</sup>; Gu<sup>21</sup>; Gu'u icu'uj<sup>21</sup>

Used by (8\*): Zoque<sup>01, 03</sup>; Totonac<sup>06</sup>; Huastec<sup>07</sup>; Yucatecan Maya<sup>09, 11</sup>; Quichean Maya<sup>13</sup>; Zapotec<sup>21</sup>

Used for (15#): Musculoskeletal<sup>03, 06, 07, 09, 11, 13, 21</sup>; Skin<sup>07, 09, 11</sup>; General and Unspecified<sup>01, 07, 21</sup>

Cognates:

Language contact:

## ***Anthemis* (Asteraceae)**

Spanish names:

Indigenous names: Manzaniya<sup>07</sup>

Used by (1\*): Huastec<sup>07</sup>

Used for (1#): General and Unspecified<sup>07</sup>

Cognates:

Language contact:

## ***Anthurium* (Araceae)**

Spanish names: Cola de Pavo; Gañate de sope/ quebra piedras/ hoja de sope/ cabeza de guajolote; Hoja de piedra/Oreja de vaca/Riñonina/ lengua de vaca; Ojo de piedra, cola de faisán; Raiz de piedra

Indigenous names: Juki ay/ kanji kopak<sup>01</sup>; Tsa ay<sup>03</sup>; Tsa ay cinco hojas<sup>03</sup>; Kiñi ay<sup>03</sup>; Tsak ujts, tsanakøxp<sup>04</sup>; Bobtun<sup>09</sup>; Xye Pu<sup>14</sup>; Xtye pu'u<sup>16</sup>; Xchich maus<sup>16</sup>; X ch'cih ma'us<sup>17</sup>

Used by (9\*): Zoque<sup>01, 02, 03</sup>; Mixe<sup>04</sup>; Yucatecan Maya<sup>09, 11</sup>; Quichean Maya<sup>14, 16, 17</sup>

Used for (26#): Digestive<sup>01, 03, 04</sup>; Cardiovascular<sup>01, 14</sup>; Musculoskeletal<sup>03</sup>; Neurological<sup>11, 16</sup>; Psychological<sup>14, 16</sup>; Skin<sup>03</sup>; Endocrine<sup>01, 03</sup>; Urological<sup>01, 02, 03</sup>; Pregnancy<sup>02, 04</sup>; Female genital<sup>04, 09</sup>; General and Unspecified<sup>11, 14</sup>; nd<sup>17</sup>

Cognates: MZ: tsa; Quich: xye pu/ xchich maus;

Language contact:

### ***Antigonon* (Polygonaceae)**

Spanish names: Camote de vibora; San Pedro

Indigenous names: Rosario aats<sup>04</sup>; Ehtiił t'uthub<sup>07</sup>; Gulachii<sup>21</sup>; Coacamalte, coamecatl<sup>26</sup>

Used by (5\*): Mixe<sup>04</sup>; Huastec<sup>07</sup>; Yucatecan Maya<sup>09</sup>; Zapotec<sup>21</sup>; Nahua<sup>26</sup>

Used for (6#): Digestive<sup>21</sup>; Musculoskeletal<sup>26</sup>; Respiratory<sup>09</sup>; Skin<sup>26</sup>; Pregnancy<sup>07</sup>; Female genital<sup>04</sup>

Cognates:

Language contact:

### ***Antrophyum* (Pteridaceae)**

Spanish names: Costilla de Culebra

Indigenous names: Xcostill kanti, Xco'stii' Kanti<sup>14</sup>

Used by (1\*): Quichean Maya<sup>14</sup>

Used for (1#): Skin<sup>14</sup>

Cognates:

Language contact:

### ***Apeiba* (Malvaceae)**

Spanish names: Papachote

Indigenous names: Pujki<sup>03</sup>

Used by (1\*): Zoque<sup>03</sup>

Used for (3#): Digestive<sup>03</sup>; Skin<sup>03</sup>; Female genital<sup>03</sup>

Cognates:

Language contact:

### ***Aphelandra* (Acanthaceae)**

Spanish names: Santa María

Indigenous names: Mecha mooya<sup>03</sup>; Kiñi nɣpin mooya<sup>03</sup>; Muuw te<sup>07</sup>; Qani holom chakmut<sup>14</sup>; Xpere` Aj tzo', Xalam Q'eheh,

Xjolom Chaqmut, Xbool, Chamat, Mai Q'eheh<sup>14</sup>; Roq sosol<sup>16</sup>; Sa'x jolom, chacmut, sita pim<sup>17</sup>

Used by (5\*): Zoque<sup>03</sup>; Huastec<sup>07</sup>; Quichean Maya<sup>14, 16, 17</sup>

Used for (16#): Cardiovascular<sup>14</sup>; Musculoskeletal<sup>14</sup>; Neurological<sup>14, 16</sup>; Psychological<sup>16</sup>; Skin<sup>03, 14</sup>; Urological<sup>14</sup>; Female genital<sup>03, 14</sup>; Male genital<sup>14</sup>; General and Unspecified<sup>07, 14</sup>; nd<sup>17</sup>

Cognates: Maya: mu; Quich: chakmut;

Language contact:

### ***Apium* (Apiaceae)**

Spanish names: Apio

Indigenous names:

Used by (4\*): Zoque<sup>01, 02</sup>; Quichean Maya<sup>12</sup>; Nahua<sup>25</sup>

Used for (6#): Digestive<sup>25</sup>; Cardiovascular<sup>02</sup>; Musculoskeletal<sup>01</sup>; Psychological<sup>12</sup>; Respiratory<sup>25</sup>; Endocrine<sup>12</sup>

Cognates:

Language contact:

### ***Arachis* (Fabaceae)**

Spanish names: Cacahuate

Indigenous names: Kacwa<sup>03</sup>; Cacau<sup>06</sup>

Used by (2\*): Zoque<sup>03</sup>; Totonac<sup>06</sup>

Used for (3#): Psychological<sup>06</sup>; Pregnancy<sup>06</sup>; Female genital<sup>03</sup>

Cognates:

Language contact:

### ***Arachniodes* (Dryopteridaceae)**

Spanish names: Calahuala

Indigenous names:

Used by (1\*): Quichean Maya<sup>12</sup>

Used for (4#): Blood<sup>12</sup>; Skin<sup>12</sup>; Urological<sup>12</sup>; General and Unspecified<sup>12</sup>

Cognates:

Language contact:

### ***Arachnothryx* (Rubiaceae)**

Spanish names: Huele de noche

Indigenous names: Puchuch Re Tzuul<sup>14</sup>; Kandel Che<sup>15</sup>

Used by (4\*): Zoque<sup>03</sup>; Quichean Maya<sup>14, 15</sup>; Zapotec<sup>21</sup>

Used for (8#): Neurological<sup>14</sup>; Psychological<sup>15, 21</sup>; Skin<sup>03</sup>; Pregnancy<sup>15</sup>; Female genital<sup>03</sup>; General and Unspecified<sup>15, 21</sup>

Cognates:

Language contact:

### ***Arbutus* (Ericaceae)**

Spanish names: Madrón; Madroña

Indigenous names: Uq'a<sup>13</sup>; On te<sup>20</sup>; Yàg-yǎn<sup>23</sup>

Used by (3\*): Quichean Maya<sup>13</sup>; Western Maya<sup>20</sup>; Zapotec<sup>23</sup>

Used for (3#): Digestive<sup>20</sup>; Skin<sup>13</sup>; General and Unspecified<sup>23</sup>

Cognates:

Language contact:

### ***Archibaccharis* (Asteraceae)**

Spanish names: Atlina

Indigenous names: Caxancapaxtli<sup>28</sup>

Used by (1\*): Nahua<sup>28</sup>

Used for (1#): Pregnancy<sup>28</sup>

Cognates:

Language contact:

### ***Arctostaphylos* (Ericaceae)**

Spanish names: Pingüica; Pingüita

Indigenous names: Yàg-blææ<sup>23</sup>

Used by (2\*): Zapotec<sup>21, 23</sup>

Used for (6#): Digestive<sup>21</sup>; Cardiovascular<sup>21</sup>; Musculoskeletal<sup>23</sup>; Psychological<sup>23</sup>; Skin<sup>23</sup>; Urological<sup>23</sup>

Cognates:

Language contact:

### ***Ardisia* (Primulaceae)**

Spanish names: Chagalapoli

Indigenous names: Tsuk nok nok<sup>03</sup>; Petx uk cuy<sup>03</sup>; Pelat puchun, wal puchun, pejte<sup>07</sup>; K'ak'al ilaal paktha<sup>07</sup>; Xook'num<sup>09</sup>

Used by (3\*): Zoque<sup>03</sup>; Huastec<sup>07</sup>; Yucatecan Maya<sup>09</sup>

Used for (10#): Digestive<sup>03, 07</sup>; Respiratory<sup>03, 09</sup>; Skin<sup>03</sup>; Female genital<sup>03</sup>; General and Unspecified<sup>03, 07</sup>

Cognates:

Language contact: Highland Popoluca <> Hua

### ***Argemone* (Papaveraceae)**

Spanish names: Cardosanto; Carmesanta; Chacalote; Chicale; Chicalote; Chicalote, cardo santo; Chicalote, Espina blanca; Magueycito/huichache

Indigenous names: Ko tzitzi<sup>02</sup>; San Pedro Agats<sup>04</sup>; Tsolich, <sup>07</sup>; Sac qix, Sak'ak'ix<sup>12</sup>; Ixmucur<sup>13</sup>; Guedxe buloj<sup>21</sup>; Guièts-nîz, guïzh-guièts-nîz<sup>23</sup>; Chicalotl<sup>28</sup>

Used by (11\*): Zoque<sup>01, 02</sup>; Mixe<sup>04</sup>; Huastec<sup>07</sup>; Yucatecan Maya<sup>09</sup>; Quichean Maya<sup>12, 13</sup>; Zapotec<sup>21, 23</sup>; Nahua<sup>27, 28</sup>

Used for (22#): Digestive<sup>01, 23</sup>; Eye<sup>07, 12, 13, 23, 27, 28</sup>; Neurological<sup>12</sup>; Respiratory<sup>02, 09, 13, 28</sup>; Skin<sup>02, 21, 28</sup>; Urological<sup>02, 09</sup>; General and Unspecified<sup>04, 09, 12, 21</sup>

Cognates:

Language contact:

### ***Aristolochia* (Aristolochiaceae)**

Spanish names: Camotillo; Contrebo; Guaco; Guaco (fino); Guaco blanco; Guaco castillo; Guaco corriente; Guaco de arbol; Guaco de castilla; Guaco de cochino, Guaco amarillo; Hierba de Sope; Hítamo real; Jacobal, cocobá; Pato de Monte

Indigenous names: Tzay jäyã/nã yutza<sup>01</sup>; Paj mʼn<sup>03</sup>; Itsaan an ohob ilaal<sup>07</sup>; Ohob ilaal<sup>07</sup>; So'osol Q'eheh <sup>14</sup>; Xjolom Kamenaq<sup>14</sup>; Patz pim<sup>14</sup>; Patz pim<sup>16</sup>; Xa'ab maus<sup>16</sup>; Cocobá<sup>18</sup>; Ajwacu<sup>18</sup>; Nojta wáko<sup>19</sup>; Ncuàan-dzèb-zhòmrèl<sup>23</sup>

Used by (13\*): Zoque<sup>01, 02, 03</sup>; Huastec<sup>07</sup>; Yucatecan Maya<sup>09, 10</sup>; Quichean Maya<sup>14, 16</sup>; Western Maya<sup>18, 19</sup>; Zapotec<sup>21, 23</sup>; Nahua<sup>26</sup>

Used for (95#): Digestive<sup>01, 02, 03, 09, 10, 18, 19, 21, 23, 26</sup>; Eye<sup>03</sup>; Cardiovascular<sup>03, 21</sup>; Musculoskeletal<sup>01, 03, 07, 18, 21, 26</sup>; Neurological<sup>03, 14, 16, 18, 21, 26</sup>; Psychological<sup>03, 14, 16</sup>; Respiratory<sup>02, 03, 07, 18</sup>; Skin<sup>01, 02, 03, 14, 18, 21, 26</sup>; Urological<sup>02, 03</sup>; Pregnancy<sup>02, 03, 09, 21</sup>; Female genital<sup>01, 02, 03, 09, 18, 19</sup>; General and Unspecified<sup>01, 03, 14, 21, 23</sup>

Cognates: Quich: patz pim;

Language contact:

### ***Arnica* (Asteraceae)**

Spanish names: Arnica

Indigenous names: Maan huitz<sup>08</sup>

Used by (1\*): Huastec<sup>08</sup>

Used for (5#): Digestive<sup>08</sup>; Musculoskeletal<sup>08</sup>; Respiratory<sup>08</sup>; Skin<sup>08</sup>; Endocrine<sup>08</sup>

Cognates:

Language contact:

### ***Arracacia* (Apiaceae)**

Spanish names: Hierba del borrego; Valeriana, Chichipate

Indigenous names: Ts'ojolil an borrego<sup>08</sup>

Used by (2\*): Huastec<sup>08</sup>; Quichean Maya<sup>12</sup>

Used for (6#): Cardiovascular<sup>12</sup>; Musculoskeletal<sup>08</sup>; Neurological<sup>12</sup>; Psychological<sup>12</sup>; Respiratory<sup>08</sup>; General and Unspecified<sup>08</sup>

Cognates:

Language contact:

### ***Artemisia* (Asteraceae)**

Spanish names: Ajenjo; Ajenjo, alcanfor, ensencio, estafiate, incienso; Ajenjo, altamsa, artemisia amarga, encenso, ensencio, té ruso, hierba santa; Altamisa, ajenjo; Artemisa; Artemisia; Estafiate; Estafiate blanco; Estafiate/estofiate; Hierba de incienso, esencia; Hierba de maestra, ajenjo; Hierba maestra; Hierba maestra, ajenjo; Incienso, Zi' zim; Yerba maestra

Indigenous names: Uksuk<sup>01</sup>; Poma ay<sup>03</sup>; Teen wits, teen ts'ohool<sup>07</sup>; Ten ts'ojol<sup>08</sup>; Tsakam ten huitz<sup>08</sup>; Si'isim<sup>09</sup>; Tsintsin<sup>11</sup>; Qa'yes, k'a q'ayes<sup>13</sup>; Sak sak, xak axaka, xaq' xaq'<sup>13</sup>; K'atab' Chaj<sup>14</sup>; Pom<sup>18</sup>; Guichuch roob<sup>21</sup>; Guïzh-maèstr<sup>23</sup>; Guïzh-guïèe-rò<sup>23</sup>; Iztahuatl<sup>26</sup>; Iztahuyaitl<sup>28</sup>

Used by (21\*): Zoque<sup>01, 02, 03</sup>; Mixe<sup>04</sup>; Totonac<sup>05</sup>; Huastec<sup>07, 08</sup>; Yucatecan Maya<sup>09, 11</sup>; Quichean Maya<sup>12, 13, 14</sup>; Western Maya<sup>18, 19</sup>; Zapotec<sup>21, 22, 23</sup>; Nahua<sup>25, 26, 27, 28</sup>

Used for (87#): Blood<sup>12</sup>; Digestive<sup>01, 02, 03, 04, 05, 07, 08, 09, 11, 12, 13, 14, 18, 21, 22, 23, 25, 26, 27, 28</sup>; Ear<sup>07</sup>; Cardiovascular<sup>12, 14</sup>; Musculoskeletal<sup>01, 12, 18</sup>; Neurological<sup>08, 12, 23, 25</sup>; Psychological<sup>01, 05, 18, 19, 22</sup>; Respiratory<sup>01, 03, 12, 13, 14, 23</sup>; Skin<sup>03, 05, 07, 22, 28</sup>; Endocrine<sup>02, 12, 13, 22</sup>; Pregnancy<sup>03, 05, 13, 21, 27</sup>; Female genital<sup>01, 02, 03, 05, 12, 13</sup>; General and Unspecified<sup>01, 03, 05, 07, 12, 18, 19, 22, 25, 28</sup>

Cognates: Hua: ten tsohol; Yuc: si'sim/tsintsin; Quich: katab' chaj / xakaxak; Zap: guïzh ro; Nah: iztauhyaitl;

Language contact:

### ***Arthrostemma* (Melastomataceae)**

Spanish names: Caña agria; Caña agria quadrata; Corona de Cristo; Xocoyuli

Indigenous names: Katzu aksa/ katzu tane/ katzu rane<sup>01</sup>; Katxu kanapoki<sup>03</sup>; X'cut'ni<sup>06</sup>; Rixijji Tz'i, Xoy Q'eheh, Kaq'i pim<sup>14</sup>;

Tzeleq' Ajsaq<sup>14</sup>; Rok' za'ak<sup>17</sup>; Paj um'um wamal, pajal wamal, majk'al akan wamal, ik'al momol<sup>20</sup>; Nidaii<sup>21</sup>

Used by (7\*): Zoque<sup>01, 03</sup>; Totonac<sup>06</sup>; Quichean Maya<sup>14, 17</sup>; Western Maya<sup>20</sup>; Zapotec<sup>21</sup>

Used for (28#): Digestive<sup>01, 06, 14, 20, 21</sup>; Eye<sup>01</sup>; Cardiovascular<sup>01</sup>; Musculoskeletal<sup>01, 14</sup>; Neurological<sup>01, 14</sup>; Psychological<sup>01</sup>;

Respiratory<sup>01, 20</sup>; Skin<sup>06, 14, 20</sup>; Endocrine<sup>03, 14</sup>; Urological<sup>01, 03, 14</sup>; Male genital<sup>14</sup>; General and Unspecified<sup>01, 14</sup>; nd<sup>17</sup>

Cognates: Zoq: katzu anV; CoreM: ak; Quich: sak/kak;

Language contact:

### ***Artocarpus* (Moraceae)**

Spanish names: Castaña; Castaño

Indigenous names:

Used by (2\*): Zoque<sup>01</sup>; Western Maya<sup>18</sup>

Used for (3#): Psychological<sup>01</sup>; Skin<sup>01</sup>; Female genital<sup>18</sup>

Cognates:

Language contact:

### ***Arundinella* (Poaceae)**

Spanish names: Cola de Caballo

Indigenous names: Xye' Kawaay<sup>14</sup>

Used by (1\*): Quichean Maya<sup>14</sup>

Used for (2#): Endocrine<sup>14</sup>; General and Unspecified<sup>14</sup>

Cognates:

Language contact:

### ***Arundo* (Poaceae)**

Spanish names: Caña de Castillo; Carigo; Carizo; Carriz

Indigenous names: Kape<sup>01</sup>; Pakaab<sup>07</sup>

Used by (5\*): Zoque<sup>01</sup>; Huastec<sup>07</sup>; Quichean Maya<sup>12</sup>; Nahua<sup>24, 26</sup>

Used for (8#): Musculoskeletal<sup>01</sup>; Neurological<sup>01</sup>; Psychological<sup>01</sup>; Skin<sup>07, 26</sup>; Pregnancy<sup>24</sup>; General and Unspecified<sup>07, 12</sup>

Cognates:

Language contact:

### ***Asclepias* (Apocynaceae)**

Spanish names: Chilillo; Flor de Mariposa; Jicaco; Marejilla; Mata caballo; Quebra muelas/ flor de serrillo; Quebramuela; Romero de monte

Indigenous names: Tusy put/witām toya remedio /tusy kuy/ wenguy tätz<sup>01</sup>; Kiñi n̄pin mooya, Misi kuts̄k<sup>03</sup>; Tyuuxi<sup>03</sup>;

Paxebaa<sup>04</sup>; Papuyut tawuan cajli, pinatawuan<sup>05</sup>; Pinatawan<sup>05</sup>; Punciix wits<sup>07</sup>; Anal, Ik'abal, Polkuts<sup>09</sup>; Utu m'zat<sup>13</sup>; Ratzum'

Pe'pem<sup>14</sup>; Guizh-měy, guièe-měy, guizh-yòob-lây, guizh-lây, guièe-ziè<sup>23</sup>; Guizh-cônéf<sup>23</sup>; Tacaxihuitl<sup>26</sup>; Oiloxtli<sup>26</sup>

Used by (12\*): Zoque<sup>01, 02, 03</sup>; Mixe<sup>04</sup>; Totonac<sup>05</sup>; Huastec<sup>07</sup>; Yucatecan Maya<sup>09</sup>; Quichean Maya<sup>13, 14</sup>; Zapotec<sup>23</sup>; Nahua<sup>26, 27</sup>

Used for (38#): Digestive<sup>01, 03, 04, 05, 07, 14, 27</sup>; Cardiovascular<sup>02, 05</sup>; Musculoskeletal<sup>01, 03, 23</sup>; Neurological<sup>01, 03, 05, 07, 09, 13, 23</sup>; Skin<sup>01, 02,</sup>

03, 05, 07, 13, 14, 26; Endocrine<sup>01</sup>; Pregnancy<sup>13, 27</sup>; General and Unspecified<sup>01, 05, 07, 27</sup>

Cognates: Zoq: t(y)ux;

Language contact:

### ***Aspidosperma* (Apocynaceae)**

Spanish names: Malereo

Indigenous names: PiĈmaŠ<sup>10</sup>

Used by (1\*): Yucatecan Maya<sup>10</sup>

Used for (1#): Digestive<sup>10</sup>

Cognates:

Language contact:



### ***Asplenium* (Aspleniaceae)**

Spanish names:

Indigenous names: Xapachik ts'ohool, koo' ha', bakan ts'ohool, ehtiiil weew koxol<sup>07</sup>

Used by (1\*): Huastec<sup>07</sup>

Used for (3#): Cardiovascular<sup>07</sup>; Neurological<sup>07</sup>; Endocrine<sup>07</sup>

Cognates:

Language contact:

### ***Aster* (Asteraceae)**

Spanish names: Hierba del burro

Indigenous names: Jok poy tsus pꞑk, Mok jipxi ay, Jok poy<sup>03</sup>

Used by (1\*): Zoque<sup>03</sup>

Used for (3#): Digestive<sup>03</sup>; Skin<sup>03</sup>; Female genital<sup>03</sup>

Cognates:

Language contact:

### ***Astraea* (Euphorbiaceae)**

Spanish names:

Indigenous names:

Used by (1\*): Huastec<sup>07</sup>

Used for (1#): Skin<sup>07</sup>

Cognates:

Language contact:

### ***Astrocaryum* (Arecaceae)**

Spanish names: Coquito

Indigenous names: Tzytzyon kuy täp<sup>01</sup>

Used by (2\*): Zoque<sup>01, 02</sup>

Used for (2#): Musculoskeletal<sup>02</sup>; General and Unspecified<sup>01</sup>

Cognates:

Language contact:

### ***Astrolepis* (Pteridaceae)**

Spanish names:

Indigenous names: Guìzh-zhīil-wlâgw, guìzh-wlâgw, yàg-zhīil-wlâgw, guìzh-zhīil-dán<sup>23</sup>; Ncuàan-dzéb-mæ̀cw<sup>23</sup>

Used by (1\*): Zapotec<sup>23</sup>

Used for (2#): Skin<sup>23</sup>; General and Unspecified<sup>23</sup>

Cognates:

Language contact:

### ***Astronium* (Anacardiaceae)**

Spanish names: Gateado; Jobillo; Tulin

Indigenous names: Putoki<sup>03</sup>

Used by (4\*): Zoque<sup>01, 03</sup>; Yucatecan Maya<sup>09, 11</sup>

Used for (10#): Digestive<sup>01, 03</sup>; Neurological<sup>03</sup>; Respiratory<sup>03, 09</sup>; Skin<sup>03, 11</sup>; Female genital<sup>01</sup>; General and Unspecified<sup>01, 03</sup>

Cognates:

Language contact:

### ***Ateleia* (Fabaceae)**

Spanish names: Palo de pozole

Indigenous names: Jam kuy<sup>02</sup>; Ta'te', thak te', kax te'<sup>107</sup>

Used by (2\*): Zoque<sup>02</sup>; Huastec<sup>07</sup>

Used for (2#): Musculoskeletal<sup>02</sup>; Skin<sup>07</sup>

Cognates:

Language contact:

### ***Attalea* (Arecaceae)**

Spanish names: Corozo, coquito

Indigenous names: Misi'yu<sup>18</sup>

Used by (1\*): Western Maya<sup>18</sup>

Used for (3#): Skin<sup>18</sup>; Endocrine<sup>18</sup>; General and Unspecified<sup>18</sup>

Cognates:

Language contact:

### ***Augusta* (Rubiaceae)**

Spanish names:

Indigenous names: Pop nꞵang mooya<sup>03</sup>

Used by (1\*): Zoque<sup>03</sup>

Used for (2#): Ear<sup>03</sup>; General and Unspecified<sup>03</sup>

Cognates:

Language contact:

### ***Avena* (Poaceae)**

Spanish names: Avena

Indigenous names:

Used by (3\*): Zoque<sup>02</sup>; Quichean Maya<sup>12, 13</sup>

Used for (5#): Blood<sup>13</sup>; Digestive<sup>13</sup>; Respiratory<sup>13</sup>; Endocrine<sup>02</sup>; General and Unspecified<sup>12</sup>

Cognates:

Language contact:

### ***Averrhoa* (Oxalidaceae)**

Spanish names: Carambola

Indigenous names:

Used by (3\*): Zoque<sup>01, 02</sup>; Western Maya<sup>18</sup>

Used for (3#): Digestive<sup>02</sup>; Urological<sup>18</sup>; Male genital<sup>01</sup>

Cognates:

Language contact:

### ***Axonopus* (Poaceae)**

Spanish names: Grama

Indigenous names: K'im<sup>13</sup>

Used by (1\*): Quichean Maya<sup>13</sup>

Used for (2#): Digestive<sup>13</sup>; Urological<sup>13</sup>

Cognates:

Language contact:

### ***Azadirachta* (Meliaceae)**

Spanish names: Nim; Nin

Indigenous names:

Used by (3\*): Zoque<sup>01, 02</sup>; Huastec<sup>08</sup>

Used for (10#): Blood<sup>02</sup>; Cardiovascular<sup>02, 08</sup>; Neurological<sup>02</sup>; Skin<sup>02</sup>; Endocrine<sup>01, 02, 08</sup>; General and Unspecified<sup>01, 08</sup>

Cognates:

Language contact:

### ***Aztecaster* (Asteraceae)**

Spanish names: Romero del campo

Indigenous names:

Used by (1\*): Zapotec<sup>22</sup>

Used for (1#): General and Unspecified<sup>22</sup>

Cognates:

Language contact:

### ***Baccharis* (Asteraceae)**

Spanish names: Arayan, rajian; Chamiso; Chamizo; Chamizo blanco; Chilca; Escoba, escobilla china; Lengua de pajarito; Sant Domingo, té de monte; Santo Domingo; Té de Monte

Indigenous names: Ok momon tsyawit/ ak manhgu tzyay/ ak mon tzyay<sup>01</sup>; Näng pojä<sup>02</sup>; Tsay mayorga<sup>03</sup>; Thintsil, thi'al tsiib, ts'itsimbe ts'ohool, ts'itsin ts'ohool, li'ax wits, akaanom ts'ohool, pamchaa ts'ohool<sup>07</sup>; Raxkej Q'os<sup>12</sup>; K'ichob', ixchop<sup>13</sup>; Uje k'ik', toj q'us, toj quas<sup>13</sup>; Bisik Q'aham Q'eheh, Re' saq' tiqobl<sup>14</sup>; Tzelek zaâk<sup>16</sup>; Vara xik', valak xik, saki xijch<sup>20</sup>; Vara xik', valak xik, vach' te' vomol, bak te'<sup>20</sup>; Mes te'<sup>20</sup>; Badzu'umij, guajgu'u<sup>21</sup>; Yak šeh<sup>22</sup>; Yäg-yàaz-nquits, yäg-yàaz-ròbáa<sup>23</sup>; Yäg-yàaz<sup>23</sup>; Yäg-yàaz-làs<sup>23</sup>

Used by (14\*): Zoque<sup>01, 02, 03</sup>; Huastec<sup>07</sup>; Quichean Maya<sup>12, 13, 14, 16, 17</sup>; Western Maya<sup>20</sup>; Zapotec<sup>21, 22, 23</sup>; Nahua<sup>26</sup>

Used for (76#): Blood<sup>07</sup>; Digestive<sup>12, 13, 20, 22, 23, 26</sup>; Ear<sup>20, 23</sup>; Cardiovascular<sup>12, 14</sup>; Musculoskeletal<sup>03, 07, 12, 13, 20, 22, 26</sup>;

Neurological<sup>01, 07, 16, 20</sup>; Psychological<sup>12, 14</sup>; Respiratory<sup>12, 13, 14, 20, 23</sup>; Skin<sup>03, 07, 12, 13, 14, 20, 21, 26</sup>; Endocrine<sup>13</sup>; Pregnancy<sup>07, 12, 13, 21, 22</sup>;

Female genital<sup>02, 13, 21</sup>; General and Unspecified<sup>01, 02, 03, 07, 12, 13, 14, 20, 21, 22, 23, 26</sup>; nd<sup>17</sup>

Cognates: Zoq: tsay; Quich: iqob/ichob; sak; q'os/q'us;

Language contact: Chiapas Zoq <> Hua; Kekchí <> Tzeltalan

### ***Bacopa* (Plantaginaceae)**

Spanish names:

Indigenous names: Tsakam wiichab, wistiil a k'iichaa, ts'akat ti ichiich, chakam thutsub<sup>07</sup>

Used by (1\*): Huastec<sup>07</sup>

Used for (3#): Psychological<sup>07</sup>; Skin<sup>07</sup>; General and Unspecified<sup>07</sup>

Cognates:

Language contact:

### ***Bactris* (Arecaceae)**

Spanish names: Jahuacte, chiquiyul

Indigenous names: Chäkyu<sup>18</sup>

Used by (1\*): Western Maya<sup>18</sup>

Used for (1#): Respiratory<sup>18</sup>

Cognates:

Language contact:

### ***Bambusa* (Poaceae)**

Spanish names:

Indigenous names: Masi caña<sup>03</sup>

Used by (1\*): Zoque<sup>03</sup>

Used for (1#): General and Unspecified<sup>03</sup>

Cognates:

Language contact:

### ***Barkeria* (Orchidaceae)**

Spanish names: Candelaria

Indigenous names:

Used by (1\*): Quichean Maya<sup>12</sup>

Used for (1#): Urological<sup>12</sup>

Cognates:

Language contact:

### ***Barkleyanthus* (Asteraceae)**

Spanish names: Chamizo amarillo

Indigenous names: Yàg-yàaz-nguëts<sup>23</sup>

Used by (1\*): Zapotec<sup>23</sup>

Used for (2#): Neurological<sup>23</sup>; General and Unspecified<sup>23</sup>

Cognates:

Language contact:

### ***Bartlettina* (Asteraceae)**

Spanish names: Guaco

Indigenous names:

Used by (1\*): Zoque<sup>03</sup>

Used for (1#): Digestive<sup>03</sup>

Cognates:

Language contact:

### ***Bauhinia* (Fabaceae)**

Spanish names: Casco de vaca; Mecate de Mico; Pata de cochi; Pata de vaca; Pativaca blanca; Pativaca roja

Indigenous names: Xitiks<sup>03</sup>; šmakan siyan toro, makačupi wacaš<sup>05</sup>; Tatil bichim<sup>07</sup>; Kibix, May vaca rojo, Ts'ulubtok<sup>09</sup>; May vaca<sup>09</sup>; Xa'ab Wacax<sup>14</sup>; Xtab'imax<sup>14</sup>

Used by (7\*): Zoque<sup>01, 03</sup>; Totonac<sup>05</sup>; Huastec<sup>07</sup>; Yucatecan Maya<sup>09, 11</sup>; Quichean Maya<sup>14</sup>

Used for (26#): Digestive<sup>01, 03, 05, 07, 09</sup>; Musculoskeletal<sup>14</sup>; Respiratory<sup>03, 09</sup>; Skin<sup>03, 05, 07, 09</sup>; Endocrine<sup>03, 09, 14</sup>; Urological<sup>03, 07, 09</sup>; Female genital<sup>03</sup>; General and Unspecified<sup>03, 07, 11, 14</sup>

Cognates:

Language contact:

### ***Bdallophytum* (Cytinaceae)**

Spanish names:

Indigenous names: Boo'wat wits, chumil a tsakah<sup>07</sup>

Used by (1\*): Huastec<sup>07</sup>

Used for (1#): Neurological<sup>07</sup>

Cognates:

Language contact:

### ***Begonia* (Begoniaceae)**

Spanish names: Begonia del monte; Caña agría; Cañita agría; Chocoyul San Miguel del Angel; Hierba de purga; Mano de león, Caña agría; San Nicolas; Xocoyole fino/blanco; Xocoyul; Xocoyul blanco

Indigenous names: Leon kʷ, Katxu kanapoki<sup>03</sup>; Kobaktʷk ay<sup>03</sup>; Nøtem ujts<sup>04</sup>; Xocovole<sup>05</sup>; X'cut'ni<sup>06</sup>; Bok'ool uxkwe', bakaanil a iits<sup>07</sup>; Hiliyi ts'ohool, ts'amuxlaab ts'ohhol, tsakam ts'amuts k'animiim, huntal an pux lat'em<sup>07</sup>; Alte'begonia<sup>08</sup>;

Kaq'i Paulul, Paulul Q'ehen<sup>14</sup>; Saq'i Pa'ulul<sup>14</sup>; Paulul Q'ehen<sup>14</sup>; Kak'i pim, pa' ulul<sup>17</sup>; Xak' peck, pa' ulul<sup>17</sup>; Pa' ulul<sup>17</sup>; Xoxoco<sup>26</sup>

Used by (12\*): Zoque<sup>01, 02, 03</sup>; Mixe<sup>04</sup>; Totonac<sup>05, 06</sup>; Huastec<sup>07, 08</sup>; Quichean Maya<sup>14, 17</sup>; Zapotec<sup>21</sup>; Nahua<sup>26</sup>

Used for (51#): Digestive<sup>01, 03, 05, 06, 08</sup>; Eye<sup>07</sup>; Ear<sup>03</sup>; Cardiovascular<sup>14</sup>; Musculoskeletal<sup>03, 08, 14, 21</sup>; Neurological<sup>02, 08</sup>; Psychological<sup>14</sup>; Skin<sup>01, 02, 03, 05, 06, 07, 14, 21</sup>; Endocrine<sup>07, 08</sup>; Urological<sup>03, 07, 14, 26</sup>; Female genital<sup>03, 04, 14</sup>; Male genital<sup>14</sup>; General and Unspecified<sup>07, 08, 14, 21</sup>; nd<sup>17</sup>

Cognates: Quich: aki pa'ulul;

Language contact: Tot <> Nah

### ***Bernardia* (Euphorbiaceae)**

Spanish names:

Indigenous names: Tsinat mahul, kwe' mahunal, liston te<sup>107</sup>

Used by (1\*): Huastec<sup>07</sup>

Used for (1#): Female genital<sup>07</sup>

Cognates:

Language contact:

### ***Beschorneria* (Asparagaceae)**

Spanish names:

Indigenous names: Tsakam tsi'iim<sup>07</sup>

Used by (1\*): Huastec<sup>07</sup>

Used for (3#): Musculoskeletal<sup>07</sup>; Skin<sup>07</sup>; General and Unspecified<sup>07</sup>

Cognates:

Language contact:

### ***Besleria* (Gesneriaceae)**

Spanish names: Cabeza de Camarón

Indigenous names: Xjolom Ma'nzaan<sup>14</sup>; Ke' hal pim<sup>17</sup>

Used by (2\*): Quichean Maya<sup>14, 17</sup>

Used for (2#): Skin<sup>14</sup>; nd<sup>17</sup>

Cognates:

Language contact:

### ***Beta* (Amaranthaceae)**

Spanish names: Acelga, remolacha; Betabel

Indigenous names:

Used by (3\*): Zoque<sup>01, 02</sup>; Quichean Maya<sup>12</sup>

Used for (6#): Digestive<sup>01</sup>; Cardiovascular<sup>12</sup>; Psychological<sup>12</sup>; Skin<sup>12</sup>; General and Unspecified<sup>02, 12</sup>

Cognates:

Language contact:

### ***Bidens* (Asteraceae)**

Spanish names: Aceitilla; Amozo; Flor de muerto, , flor del alma; Mozote blanco, Aceitilla; Mozote planco; Mozote, acahual blanco

Indigenous names: Anima jäyă<sup>01</sup>; Uentex ay<sup>03</sup>; X'tiyu snapapap<sup>06</sup>; Kelem ts'aah<sup>07</sup>; Kelem, kelem wits<sup>07</sup>; Ya'axk'an-ak<sup>09</sup>; Sahun, Saksahun<sup>09</sup>; Job'on chokoj<sup>11</sup>; Xub'ay<sup>14</sup>; Tuix momol<sup>20</sup>; Guièe-tĩ-nquits<sup>23</sup>; Guièe-tĩ<sup>23</sup>; Mózotl<sup>25</sup>; Tzompiltecle<sup>26</sup>; Mozotl<sup>26</sup>

Used by (12\*): Zoque<sup>01, 03</sup>; Totonac<sup>05, 06</sup>; Huastec<sup>07</sup>; Yucatecan Maya<sup>09, 11</sup>; Quichean Maya<sup>14</sup>; Western Maya<sup>20</sup>; Zapotec<sup>23</sup>; Nahua<sup>25, 26</sup>

Used for (37#): Digestive<sup>05, 06, 07, 09, 20, 25</sup>; Cardiovascular<sup>05, 23</sup>; Musculoskeletal<sup>06, 14</sup>; Neurological<sup>03, 14</sup>; Psychological<sup>03, 14, 23</sup>; Respiratory<sup>07, 09, 25, 26</sup>; Skin<sup>01, 03, 07, 25</sup>; Endocrine<sup>25</sup>; Urological<sup>06, 26</sup>; Pregnancy<sup>26</sup>; Female genital<sup>03</sup>; General and Unspecified<sup>03, 06, 07, 09, 11, 14</sup>

Cognates: Nah: mozotl;

Language contact:

### ***Bignonia* (Bignoniaceae)**

Spanish names: Bejuco de pimienta

Indigenous names: Moke poj<sup>02</sup>; Bichim ts'aah, pelat koox<sup>07</sup>; Punath, punal, ataa ch'aah<sup>07</sup>; Ek'k'ixil, Soski-ak<sup>09</sup>; Puj Q'ehen<sup>14</sup>; Cajlmecatí<sup>24</sup>

Used by (5\*): Zoque<sup>02</sup>; Huastec<sup>07</sup>; Yucatecan Maya<sup>09</sup>; Quichean Maya<sup>14</sup>; Nahua<sup>24</sup>

Used for (10#): Digestive<sup>02, 07</sup>; Musculoskeletal<sup>07, 14</sup>; Neurological<sup>07, 14</sup>; Skin<sup>09</sup>; Urological<sup>07</sup>; Pregnancy<sup>24</sup>; General and Unspecified<sup>07</sup>

Cognates:

Language contact:

### ***Biophytum* (Oxalidaceae)**

Spanish names: Palmita

Indigenous names: Coco ay, Chuch suyat<sup>03</sup>; Tek xuuxy ujts<sup>04</sup>; Tlalhuaxe<sup>26</sup>

Used by (3\*): Zoque<sup>03</sup>; Mixe<sup>04</sup>; Nahua<sup>26</sup>

Used for (6#): Digestive<sup>03, 26</sup>; Psychological<sup>03, 04</sup>; Pregnancy<sup>03</sup>; General and Unspecified<sup>03</sup>

Cognates:

Language contact:

### ***Bixa* (Bixaceae)**

Spanish names: Achiote

Indigenous names: Tzine ay/Zini<sup>01</sup>; Pukä<sup>02</sup>; Cuy puk<sup>03</sup>; Axut<sup>04</sup>; Ki'wi', K'uxub<sup>09</sup>; KuŠu<sup>10</sup>; Q'axob<sup>13</sup>; Xayaw<sup>14</sup>; Xaq xa yaw<sup>16</sup>; Jo'ox<sup>18</sup>; Kiwi<sup>19</sup>; Mbeye'e<sup>21</sup>

Used by (14\*): Zoque<sup>01, 02, 03</sup>; Mixe<sup>04</sup>; Totonac<sup>06</sup>; Yucatecan Maya<sup>09, 10</sup>; Quichean Maya<sup>12, 13, 14, 16</sup>; Western Maya<sup>18, 19</sup>; Zapotec<sup>21</sup>

Used for (45#): Digestive<sup>01, 09, 14, 18, 19, 21</sup>; Ear<sup>01</sup>; Cardiovascular<sup>01, 14</sup>; Musculoskeletal<sup>01, 18, 21</sup>; Neurological<sup>01, 03</sup>; Psychological<sup>16</sup>; Respiratory<sup>01, 10</sup>; Skin<sup>01, 02, 03, 04, 09, 10, 12, 13, 18, 21</sup>; Endocrine<sup>14</sup>; Urological<sup>01, 03</sup>; Pregnancy<sup>02, 03</sup>; Female genital<sup>03, 14, 21</sup>; Male genital<sup>01</sup>; General and Unspecified<sup>01, 02, 03, 04, 06, 09, 10, 18, 21</sup>

Cognates: Zoq: puk; Yuc: kuxu; Quich: xayaw;

Language contact: Yuc <> K'iche' & Chortí

### ***Blakea* (Melastomataceae)**

Spanish names:

Indigenous names: Yot' eq<sup>14</sup>; Oxlaju' ch'ajom<sup>17</sup>

Used by (2\*): Quichean Maya<sup>14, 17</sup>

Used for (2#): Digestive<sup>14</sup>; nd<sup>17</sup>

Cognates:

Language contact:

### ***Blechnum* (Blechnaceae)**

Spanish names:

Indigenous names: Tsabats chimal<sup>03</sup>

Used by (1\*): Zoque<sup>03</sup>

Used for (2#): Pregnancy<sup>03</sup>; General and Unspecified<sup>03</sup>

Cognates:

Language contact:

### ***Blechnum* (Acanthaceae)**

Spanish names: Cancerillo; Hueso de rana

Indigenous names: Yexu' tsaakuy elul, xonnol palats verde, san miguel wits, itsaan an tsabal muuw, bohool ch'ohool<sup>07</sup>; Ak'abxiw<sup>09</sup>

Used by (5\*): Zoque<sup>03</sup>; Huastec<sup>07</sup>; Yucatecan Maya<sup>09</sup>; Quichean Maya<sup>17</sup>; Western Maya<sup>18</sup>

Used for (8#): Digestive<sup>07, 09</sup>; Skin<sup>07, 18</sup>; General and Unspecified<sup>03, 07, 09</sup>; nd<sup>17</sup>

Cognates:

Language contact:

### ***Blepharidium* (Rubiaceae)**

Spanish names: Girayol

Indigenous names: Yaxté<sup>14</sup>

Used by (1\*): Quichean Maya<sup>14</sup>

Used for (2#): Skin<sup>14</sup>; General and Unspecified<sup>14</sup>

Cognates:

Language contact:

### ***Blepharocalyx* (Myrtaceae)**

Spanish names: Anacahuite

Indigenous names: Hkshi vit<sup>08</sup>

Used by (1\*): Huastec<sup>08</sup>

Used for (2#): Skin<sup>08</sup>; General and Unspecified<sup>08</sup>

Cognates:

Language contact:

### ***Bocconia* (Papaveraceae)**

Spanish names: Arnica; Gordolobo; Gordolobo (grande); Hoja de toro; Llorasangre; Llorasangre

Indigenous names: Susyui dane<sup>01</sup>; AkꝀiꝀileqs tuwan<sup>05</sup>; Tsixte<sup>07</sup>; Ts'ixte<sup>08</sup>; Racan kaminaq<sup>12</sup>; Xilcuahuitl<sup>26</sup>

Used by (9\*): Zoque<sup>01, 03</sup>; Totonac<sup>05</sup>; Huastec<sup>07, 08</sup>; Quichean Maya<sup>12</sup>; Zapotec<sup>23</sup>; Nahua<sup>25, 26</sup>

Used for (22#): Digestive<sup>26</sup>; Cardiovascular<sup>08</sup>; Musculoskeletal<sup>08, 23</sup>; Neurological<sup>07, 08, 12</sup>; Psychological<sup>12</sup>; Respiratory<sup>03, 05, 08, 26</sup>; Skin<sup>01, 03, 05, 23, 25, 26</sup>; Endocrine<sup>08</sup>; Urological<sup>08</sup>; Female genital<sup>26</sup>; General and Unspecified<sup>08</sup>

Cognates: Hua: tsixte;

Language contact: Hua > Tot

### ***Boerhavia* (Nyctaginaceae)**

Spanish names: Hoja de azar embra; Vergonzosa, pega; Yerba de arretes

Indigenous names: Tza'a tzoj<sup>01</sup>; Chakle<sup>09</sup>; Gurakw<sup>22</sup>

Used by (4\*): Zoque<sup>01</sup>; Yucatecan Maya<sup>09</sup>; Zapotec<sup>21, 22</sup>

Used for (8#): Digestive<sup>22</sup>; Respiratory<sup>21</sup>; Skin<sup>01, 09, 21</sup>; General and Unspecified<sup>01, 22</sup>

Cognates:

Language contact:

### ***Bolbitis* (Dryopteridaceae)**

Spanish names:

Indigenous names: Quax kay pim<sup>16</sup>

Used by (2\*): Quichean Maya<sup>16, 17</sup>

Used for (2#): Psychological<sup>16</sup>; nd<sup>17</sup>

Cognates:

Language contact:

### ***Bomarea* (Alstroemeriaceae)**

Spanish names: Campana; Lirio de Montaña

Indigenous names: San migeel wits, okoob pichich<sup>07</sup>; Aq'om Q'enqoj Aq'om, Rawen K'echelaj Aq'om<sup>12</sup>; Tzujtzuj Q'eheh<sup>14</sup>; Lo'loin<sup>20</sup>

Used by (5\*): Zoque<sup>03</sup>; Huastec<sup>07</sup>; Quichean Maya<sup>12, 14</sup>; Western Maya<sup>20</sup>

Used for (12#): Digestive<sup>07, 12, 14, 20</sup>; Psychological<sup>07</sup>; Skin<sup>07, 14</sup>; Endocrine<sup>07</sup>; Urological<sup>12</sup>; Female genital<sup>03</sup>; General and Unspecified<sup>14</sup>

Cognates:

Language contact:

### ***Bonellia* (Primulaceae)**

Spanish names:

Indigenous names: Korpus wits, k'iith wich<sup>07</sup>; Sink'inche<sup>09</sup>

Used by (2\*): Huastec<sup>07</sup>; Yucatecan Maya<sup>09</sup>

Used for (3#): Neurological<sup>07</sup>; Respiratory<sup>07</sup>; General and Unspecified<sup>09</sup>

Cognates:

Language contact:

### ***Borago* (Boraginaceae)**

Spanish names: Borragia; Borraja; Borrajas

Indigenous names:

Used by (6\*): Zoque<sup>01</sup>; Quichean Maya<sup>12</sup>; Zapotec<sup>21, 23</sup>; Nahua<sup>25, 27</sup>

Used for (12#): Cardiovascular<sup>12</sup>; Neurological<sup>12</sup>; Respiratory<sup>01, 12, 21, 23, 25, 27</sup>; Skin<sup>23</sup>; Pregnancy<sup>12</sup>; General and Unspecified<sup>12, 23</sup>

Cognates:

Language contact:

### ***Bougainvillea* (Nyctaginaceae)**

Spanish names: Baugmvilla; Bugambilia; Bugambilia morada; Buganbilia

Indigenous names: Apit jäyá<sup>01</sup>; Buganbiya<sup>07</sup>; Shpupukuishonat<sup>08</sup>; Yäg-bügàmbîl<sup>23</sup>

Used by (16\*): Zoque<sup>01, 02, 03</sup>; Mixe<sup>04</sup>; Huastec<sup>07, 08</sup>; Quichean Maya<sup>12, 13</sup>; Western Maya<sup>18, 19</sup>; Zapotec<sup>21, 23</sup>; Nahua<sup>25, 26, 27, 28</sup>

Used for (30#): Digestive<sup>02, 25</sup>; Cardiovascular<sup>25</sup>; Musculoskeletal<sup>08</sup>; Psychological<sup>01, 27</sup>; Respiratory<sup>01, 02, 03, 04, 08, 12, 13, 18, 19, 21, 25, 26, 27, 28</sup>; Skin<sup>01</sup>; Endocrine<sup>08</sup>; Urological<sup>08</sup>; Pregnancy<sup>07</sup>; General and Unspecified<sup>08, 12, 21, 23, 25, 28</sup>

Cognates:

Language contact:

### ***Bourreria* (Boraginaceae)**

Spanish names: Roble; Tres bono

Indigenous names: Oxib' boon<sup>14</sup>

Used by (2\*): Yucatecan Maya<sup>11</sup>; Quichean Maya<sup>14</sup>

Used for (3#): Psychological<sup>11</sup>; Endocrine<sup>14</sup>; General and Unspecified<sup>11</sup>

Cognates:

Language contact:

### ***Bouvardia* (Rubiaceae)**

Spanish names: Pericón rojo

Indigenous names:

Used by (1\*): Quichean Maya<sup>12</sup>

Used for (5#): Blood<sup>12</sup>; Neurological<sup>12</sup>; Skin<sup>12</sup>; Endocrine<sup>12</sup>; General and Unspecified<sup>12</sup>

Cognates:

Language contact:

### ***Brachiaria* (Poaceae)**

Spanish names:

Indigenous names: Leh toom<sup>07</sup>

Used by (1\*): Huastec<sup>07</sup>

Used for (1#): Skin<sup>07</sup>

Cognates:

Language contact:

### ***Brachistus* (Solanaceae)**

Spanish names: Tomatillo

Indigenous names: Xcoya che<sup>12</sup>

Used by (1\*): Quichean Maya<sup>12</sup>

Used for (2#): Digestive<sup>12</sup>; Endocrine<sup>12</sup>

Cognates:

Language contact:



### ***Brahea* (Arecaceae)**

Spanish names:

Indigenous names: Yàg-zîn<sup>23</sup>

Used by (1\*): Zapotec<sup>23</sup>

Used for (1#): General and Unspecified<sup>23</sup>

Cognates:

Language contact:

### ***Brassica* (Brassicaceae)**

Spanish names: Mostaza; Mostaza ; Napu; Repollo

Indigenous names: Napx<sup>12</sup>; Pixla'q<sup>12</sup>; Ripoy<sup>13</sup>; Mostas gihš<sup>22</sup>; Mòxtâz<sup>23</sup>

Used by (9\*): Zoque<sup>01, 02</sup>; Yucatecan Maya<sup>11</sup>; Quichean Maya<sup>12, 13</sup>; Western Maya<sup>19</sup>; Zapotec<sup>21, 22, 23</sup>

Used for (28#): Digestive<sup>02, 12, 19, 21, 23</sup>; Musculoskeletal<sup>11, 22</sup>; Neurological<sup>11, 19, 22</sup>; Respiratory<sup>23</sup>; Skin<sup>01, 11, 12, 13</sup>; Endocrine<sup>02</sup>; Urological<sup>12</sup>; Pregnancy<sup>21</sup>; Female genital<sup>02</sup>; General and Unspecified<sup>02, 11, 12, 19, 21, 22, 23</sup>

Cognates:

Language contact:

### ***Bravaisia* (Acanthaceae)**

Spanish names:

Indigenous names: Tz'ulub' Che<sup>14</sup>

Used by (1\*): Quichean Maya<sup>14</sup>

Used for (2#): Neurological<sup>14</sup>; Social problems<sup>14</sup>

Cognates:

Language contact:

### ***Brickellia* (Asteraceae)**

Spanish names: Hojita larga

Indigenous names: Ueji ay<sup>03</sup>; Komino ts'ohool, alte yexu' ts'ohool<sup>07</sup>; Ch'ail pox<sup>20</sup>; Guizh-yòob-lây<sup>23</sup>

Used by (5\*): Zoque<sup>01, 03</sup>; Huastec<sup>07</sup>; Western Maya<sup>20</sup>; Zapotec<sup>23</sup>

Used for (5#): Digestive<sup>01, 20</sup>; Psychological<sup>03, 23</sup>; General and Unspecified<sup>07</sup>

Cognates:

Language contact:

### ***Bromelia* (Bromeliaceae)**

Spanish names: Muta, piñuela; Pinuela

Indigenous names: Chicui<sup>03</sup>; Patsikt<sup>04</sup>; Bathuch, bathuts<sup>07</sup>; Ch'om, Ch'am<sup>09</sup>; Tzetze<sup>19</sup>

Used by (5\*): Zoque<sup>03</sup>; Mixe<sup>04</sup>; Huastec<sup>07</sup>; Yucatecan Maya<sup>09</sup>; Western Maya<sup>19</sup>

Used for (7#): Ear<sup>19</sup>; Musculoskeletal<sup>04, 07</sup>; Skin<sup>03, 07</sup>; Pregnancy<sup>09</sup>; Female genital<sup>09</sup>

Cognates: MZ: chik/tsik;

Language contact:

### ***Brongniartia* (Fabaceae)**

Spanish names:

Indigenous names: Guizh-càpâr<sup>23</sup>

Used by (1\*): Zapotec<sup>23</sup>

Used for (1#): General and Unspecified<sup>23</sup>

Cognates:

Language contact:

### ***Bronwenia* (Malpighiaceae)**

Spanish names: Hierba florentina

Indigenous names:

Used by (1\*): Zoque<sup>01</sup>

Used for (1#): Musculoskeletal<sup>01</sup>

Cognates:

Language contact:

### ***Brosimum* (Moraceae)**

Spanish names: Ramón

Indigenous names: Ohox, ojox, ojx<sup>07</sup>; Ox<sup>09</sup>; Viguiiru'u<sup>21</sup>

Used by (3\*): Huastec<sup>07</sup>; Yucatecan Maya<sup>09</sup>; Zapotec<sup>21</sup>

Used for (3#): Neurological<sup>07</sup>; Respiratory<sup>09</sup>; General and Unspecified<sup>21</sup>

Cognates: Maya: ox;

Language contact:

### ***Brugmansia* (Solanaceae)**

Spanish names: Campana; Chanico; Flor de campana; Florifundia, flor de campana; Florifundio, flor de campana; Floripondio; Floripondio, flor de campana blanca; Hoja de campana, rosa

Indigenous names: Lokitsy/Kampentu/ kauptu jäya<sup>01</sup>; Nunak mooya<sup>03</sup>; Kalapuš<sup>05</sup>; Kampaana wits<sup>07</sup>; Sach campana, asak<sup>13</sup>; Tzinläwe<sup>18</sup>; Guièe-pünt, yäg-guièe-pünt<sup>23</sup>

Used by (11\*): Zoque<sup>01, 03</sup>; Totonac<sup>05</sup>; Huastec<sup>07</sup>; Yucatecan Maya<sup>10</sup>; Quichean Maya<sup>13</sup>; Western Maya<sup>18</sup>; Zapotec<sup>21, 23</sup>; Nahua<sup>25, 26</sup>

Used for (33#): Digestive<sup>01, 03, 13</sup>; Ear<sup>10</sup>; Cardiovascular<sup>01, 21</sup>; Musculoskeletal<sup>01, 03, 18, 21, 26</sup>; Neurological<sup>01, 13, 18</sup>; Psychological<sup>05, 13</sup>; Respiratory<sup>01, 21, 25</sup>; Skin<sup>01, 05, 07, 21, 25, 26</sup>; General and Unspecified<sup>01, 07, 21, 23</sup>

Cognates:

Language contact:

### ***Bryophyllum* (Crassulaceae)**

Spanish names: Beladona; Beladona/sanalotodo; Belladona, sanalotodo, pericón; Hoja de aire; Maravilla; Palito pinto; Sanalotodo/Beladona/malva/hoja de paperón; Siempre viva; Siempreviva; Siempreviva, hoja fresca; Siempreviva, maravillosa, lengua de mujer

Indigenous names: Siwe tane<sup>01</sup>; Lakanyo/malva tane/ tini rane)/tok tzäksy/siwe tane/ tukun jäyä<sup>01</sup>; Tzikin kuy<sup>01</sup>; Tøts ujts<sup>04</sup>; Tkuya tuwan<sup>05</sup>; Tolow xekel, binage ts'ohool, lam ts'ohool, pahab eheenxh, pak'ak ts'ohool, xutsun buuru, pahab at'ax inik, pak'ak' xuts, toltha' ch'ohool<sup>07</sup>; Guish marauii, lu'ujtzanguana'aj<sup>21</sup>; Guizh-cùchâr, rlăal\_x-pææd-á, guièe-yùzh<sup>23</sup>; Campanaxochitl<sup>26</sup>

Used by (15\*): Zoque<sup>01, 02, 03</sup>; Mixe<sup>04</sup>; Totonac<sup>05</sup>; Huastec<sup>07</sup>; Yucatecan Maya<sup>09, 10, 11</sup>; Quichean Maya<sup>13, 16</sup>; Western Maya<sup>18</sup>; Zapotec<sup>21, 23</sup>; Nahua<sup>26</sup>

Used for (54#): Digestive<sup>01, 02, 03, 07, 18</sup>; Eye<sup>03, 05</sup>; Ear<sup>03</sup>; Cardiovascular<sup>07</sup>; Musculoskeletal<sup>01, 02, 03, 10, 11, 18, 21</sup>; Neurological<sup>01, 02, 03, 04, 05, 07, 16, 18, 26</sup>; Psychological<sup>07</sup>; Respiratory<sup>01, 03, 18</sup>; Skin<sup>01, 02, 03, 07, 09, 10, 11, 13, 21, 23, 26</sup>; Endocrine<sup>07</sup>; Urological<sup>21</sup>; General and Unspecified<sup>01, 03, 04, 07, 13, 21, 26</sup>

Cognates:

Language contact:

### ***Buddleja* (Scrophulariaceae)**

Spanish names: Cacho de venado, salvia santa; Huacalillo; Lavatraste; Lengua de vaca; Salve real; Salvia santa, hoja blanca; Teposan

Indigenous names: Xiapun ay<sup>03</sup>; Pajuik<sup>04</sup>; Pulik elte', thak te' hunta a anaamte<sup>07</sup>; Salv' sant'<sup>13</sup>; Saq rix pim<sup>16</sup>; T'oxpe<sup>19</sup>; Sak yok te<sup>20</sup>; Gush blaad<sup>21</sup>; Bala giwi<sup>22</sup>; Blàg-wi, lùdz-ngön, yäg-chànêcw<sup>23</sup>; Nesahuashihuitl<sup>25</sup>; Tepozan<sup>26</sup>; Zayoliscan<sup>28</sup>

Used by (13\*): Zoque<sup>03</sup>; Mixe<sup>04</sup>; Huastec<sup>07</sup>; Quichean Maya<sup>13, 16</sup>; Western Maya<sup>19, 20</sup>; Zapotec<sup>21, 22, 23</sup>; Nahua<sup>25, 26, 28</sup>

Used for (39#): Digestive<sup>04, 19, 20, 22, 23, 25, 28</sup>; Musculoskeletal<sup>19, 23</sup>; Neurological<sup>16, 19, 26</sup>; Psychological<sup>16, 19</sup>; Respiratory<sup>03, 19, 21</sup>; Skin<sup>03, 07, 13, 21, 25, 26, 28</sup>; Pregnancy<sup>13, 19, 21, 26</sup>; Female genital<sup>19</sup>; General and Unspecified<sup>03, 07, 13, 19, 21, 22, 23, 28</sup>

Cognates: CoreM: sak; Nah: b(a)lag(i)wi;

Language contact:

### ***Bunchosia* (Malpighiaceae)**

Spanish names:

Indigenous names: Sipche<sup>09</sup>

Used by (1\*): Yucatecan Maya<sup>09</sup>

Used for (2#): Digestive<sup>09</sup>; Neurological<sup>09</sup>

Cognates:

Language contact:

### ***Bursera* (Burseraceae)**

Spanish names: Aceitillo; Azafrán; Chaca; Chacah blanco/ morado; Chaká; Copal; Copalero; Hoja de sumerio; Jiote, fiote, palo chino; Mulato; Mulato (rojo); Mulato negro; Mulato rojo; Palo de Hombre, Palo de Jiote; Palo de Jiote; Palo mulato; Sasafrás

Indigenous names: Tzaps kuy<sup>01</sup>; Äkyui/uwäk kuy/tzatz kuy/tzapas kuy<sup>01</sup>; Tzäk/tzäksy<sup>02</sup>; Bi Tzäksy/yäk tzäksy<sup>02</sup>; Putoki<sup>03</sup>; Tsɤk<sup>03</sup>; Tsøk<sup>04</sup>; Tusun, chaca, tusuni<sup>05</sup>; Tsaka, tsakah, chaka<sup>07</sup>; Kaxiy tsakah, tsamnek tsakah<sup>07</sup>; Tsaka<sup>08</sup>; Chakah<sup>09</sup>; Čacah<sup>10</sup>; Chi'kaj (blanco/ morado)<sup>11</sup>; Sali Che<sup>12</sup>; Che' Winq, Kaq'aj<sup>14</sup>; Kak'hajl che<sup>17</sup>; Chäk' zulte<sup>18</sup>; Chakajr<sup>19</sup>;

Yalajguettu'u<sup>21</sup>; li'guiaj<sup>21</sup>; Guish yaguiyaj<sup>21</sup>; Yahl<sup>22</sup>; Yäg-yàal, yäg-guín-quiè<sup>23</sup>

Used by (21\*): Zoque<sup>01, 02, 03</sup>; Mixe<sup>04</sup>; Totonac<sup>05</sup>; Huastec<sup>07, 08</sup>; Yucatecan Maya<sup>09, 10, 11</sup>; Quichean Maya<sup>12, 14, 17</sup>; Western Maya<sup>18, 19</sup>; Zapotec<sup>21, 22, 23</sup>; Nahua<sup>25, 26, 27</sup>

Used for (95#): Digestive<sup>01, 02, 03, 05, 07, 14, 21, 26, 27</sup>; Cardiovascular<sup>03, 14</sup>; Musculoskeletal<sup>01, 03, 07, 08, 12, 14, 18, 21, 23</sup>; Neurological<sup>05, 07, 08, 10, 14, 22, 25</sup>; Psychological<sup>07</sup>; Respiratory<sup>07, 12, 21, 25</sup>; Skin<sup>01, 02, 03, 05, 07, 08, 10, 14, 21, 26, 27</sup>; Endocrine<sup>01, 02, 14</sup>; Urological<sup>02, 05, 12, 14, 18, 19</sup>;

Pregnancy<sup>02, 21</sup>; Female genital<sup>01, 03, 21</sup>; Male genital<sup>01</sup>; General and Unspecified<sup>01, 02, 03, 04, 05, 07, 08, 09, 10, 11, 12, 18, 19, 21, 22, 23, 25, 26, nd<sup>17</sup></sup>

Cognates: MZ: tsäk; Zoq: tsäk; Maya: tsaka / chaka; Hua: tsaka; CoreM: chakaj; Yuc: chaka; Quich: kakaj; WesM: chäk / chak; Zap: yal;

Language contact: MZ > Maya

### ***Buxus* (Buxaceae)**

Spanish names: Mirto Oloroso, Boj, Mirto, Lemonaria

Indigenous names:

Used by (1\*): Quichean Maya<sup>12</sup>

Used for (3#): Neurological<sup>12</sup>; Respiratory<sup>12</sup>; General and Unspecified<sup>12</sup>

Cognates:

Language contact:

### ***Byrsonima* (Malpighiaceae)**

Spanish names: Nance; Nance dulce; Nanche; Nanche/ nance; Nanchi; Tomatillo, tamaquilpa

Indigenous names: Nansin<sup>01</sup>; Nansin/ tupsy tām<sup>02</sup>; Nanchin<sup>03</sup>; Tax<sup>04</sup>; Chi<sup>09</sup>; Či<sup>10</sup>; Tapal<sup>13</sup>; Chi<sup>14</sup>; Chi<sup>18</sup>; Chi<sup>19</sup>; Nantzin, lantzin, nantz chi<sup>20</sup>; Mbatsi<sup>21</sup>; Bälwi<sup>22</sup>; Yäg-ngùd-guèy-pcàal, yäg-ngùd-pcàal, guizh-pcàal, ngùd-guèy-nguèts<sup>23</sup>

Used by (17\*): Zoque<sup>01, 02, 03</sup>; Mixe<sup>04</sup>; Totonac<sup>06</sup>; Yucatecan Maya<sup>09, 10, 11</sup>; Quichean Maya<sup>12, 13, 14</sup>; Western Maya<sup>18, 19, 20</sup>; Zapotec<sup>21, 22, 23</sup>

Used for (50#): Digestive<sup>01, 02, 03, 04, 06, 09, 10, 13, 18, 19, 20, 21, 22</sup>; Eye<sup>02</sup>; Cardiovascular<sup>02</sup>; Musculoskeletal<sup>01</sup>; Neurological<sup>01, 02, 19</sup>; Psychological<sup>03</sup>; Respiratory<sup>02, 12, 20, 21</sup>; Skin<sup>01, 02, 03, 04, 09, 11, 20, 21</sup>; Endocrine<sup>02, 14</sup>; Urological<sup>01, 02, 03</sup>; Pregnancy<sup>02</sup>; Female genital<sup>01, 02, 03, 04, 21</sup>; General and Unspecified<sup>02, 09, 12, 13, 20, 21, 23</sup>

Cognates: Zoq: nansin/nanchin; Maya: chi;

Language contact: Zoq <> Maya; Mixe <> K'iche'

### ***Byttneria* (Malvaceae)**

Spanish names: Uña de gato (blanco)/cola de iguana/cola de garrobo

Indigenous names: Misyu apits/ tzätzän tuts/ nu'tzi tutz<sup>01</sup>; Bolool othow, bolool uthu<sup>07</sup>

Used by (2\*): Zoque<sup>01</sup>; Huastec<sup>07</sup>

Used for (8#): Digestive<sup>01, 07</sup>; Eye<sup>01</sup>; Cardiovascular<sup>01</sup>; Musculoskeletal<sup>01</sup>; Skin<sup>01</sup>; Pregnancy<sup>07</sup>; General and Unspecified<sup>07</sup>

Cognates:

Language contact:

### ***Cabomba* (Cabombaceae)**

Spanish names:

Indigenous names: Weew bexe', hitil<sup>07</sup>

Used by (1\*): Huastec<sup>07</sup>

Used for (2#): Neurological<sup>07</sup>; General and Unspecified<sup>07</sup>

Cognates:

Language contact:

### ***Caesalpinia* (Fabaceae)**

Spanish names: Hoja de maravilla; Ortensia; Siquin colorado

Indigenous names: Tsas mooya<sup>03</sup>; Eelaa<sup>07</sup>; San husee te', san husee wits<sup>07</sup>; Kitamche<sup>09</sup>; Sin k'in<sup>11</sup>; So'sol Q'ehen, Kanteel Maus<sup>14</sup>

Used by (7\*): Zoque<sup>03</sup>; Huastec<sup>07</sup>; Yucatecan Maya<sup>09, 10, 11</sup>; Quichean Maya<sup>14</sup>; Zapotec<sup>21</sup>

Used for (15#): Digestive<sup>07, 21</sup>; Musculoskeletal<sup>03, 21</sup>; Neurological<sup>14, 21</sup>; Psychological<sup>07, 14</sup>; Respiratory<sup>03</sup>; Skin<sup>03</sup>; Female genital<sup>03</sup>; General and Unspecified<sup>09, 10, 11, 14</sup>

Cognates:

Language contact:

### ***Caladium* (Araceae)**

Spanish names:

Indigenous names: Tsabats txixx pixi<sup>03</sup>

Used by (1\*): Zoque<sup>03</sup>

Used for (1#): Skin<sup>03</sup>

Cognates:

Language contact:

### ***Calanthe* (Orchidaceae)**

Spanish names: Cebollin

Indigenous names: Cebollin Aq'om<sup>12</sup>

Used by (1\*): Quichean Maya<sup>12</sup>

Used for (4#): Digestive<sup>12</sup>; Skin<sup>12</sup>; Urological<sup>12</sup>; General and Unspecified<sup>12</sup>

Cognates:

Language contact:

### ***Calathea* (Marantaceae)**

Spanish names: Hoja blanca

Indigenous names: Pop' ay/popo ay<sup>01</sup>; Pob ay<sup>03</sup>; Moxpim<sup>14</sup>; Kok' moch pim<sup>14</sup>; Koq mush<sup>16</sup>; Yoco to<sup>18</sup>; Balagaquitzii<sup>21</sup>

Used by (6\*): Zoque<sup>01, 03</sup>; Quichean Maya<sup>14, 16</sup>; Western Maya<sup>18</sup>; Zapotec<sup>21</sup>

Used for (17#): Digestive<sup>01</sup>; Eye<sup>03</sup>; Psychological<sup>16</sup>; Skin<sup>01, 21</sup>; Pregnancy<sup>01, 14, 18, 21</sup>; Female genital<sup>03, 14, 18</sup>; General and Unspecified<sup>21</sup>

Cognates: Zoq: pop ay; Quich: kok moch/mux;

Language contact:

### ***Calea* (Asteraceae)**

Spanish names: Cacahuatón; Chinche; Hierba del perro/prodegiosa/ chinina/ lengua de borrego; Jaral; Mala hierba; Prodigiosa blanca; Prolijiosa/ prodigiosa (amarilla); Trabuco, hierba amarga

Indigenous names: Tuwi ay/ takak tane<sup>01</sup>; Añi mutx ay<sup>03</sup>; Tam juñi<sup>03</sup>; Tsapt taam ujts<sup>04</sup>; Poop taam ujts<sup>04</sup>; Šuna tuwan<sup>05</sup>; Tsuleek' ethem, betse' ts'ohool, pun lat'em, xamxam, weew ethem, tsabaal tok'te', ehok witsiim<sup>07</sup>; Pux lat'em<sup>08</sup>; Xka'xikin, Xikinkaax<sup>09</sup>; Ich wou<sup>14</sup>; Ton ch'a te<sup>20</sup>; Sakil chi'xal wamal<sup>20</sup>; Škwam bižeh/ ghihb<sup>22</sup>; Ncuàan-zân<sup>23</sup>; Axcaxihuitl<sup>26</sup>

Used by (13\*): Zoque<sup>01, 03</sup>; Mixe<sup>04</sup>; Totonac<sup>05</sup>; Huastec<sup>07, 08</sup>; Yucatecan Maya<sup>09</sup>; Quichean Maya<sup>14</sup>; Western Maya<sup>20</sup>; Zapotec<sup>21, 22, 23</sup>; Nahuatl<sup>26</sup>

Used for (39#): Digestive<sup>01, 03, 04, 07, 08, 09, 20, 21, 22</sup>; Cardiovascular<sup>22</sup>; Musculoskeletal<sup>03, 22</sup>; Psychological<sup>22</sup>; Respiratory<sup>03, 07</sup>; Skin<sup>01, 03, 07, 09</sup>; Endocrine<sup>01</sup>; Pregnancy<sup>22, 23, 26</sup>; Female genital<sup>03</sup>; General and Unspecified<sup>01, 03, 04, 05, 07, 14</sup>

Cognates: MZ: tam; Zoq: taC; Hua: puC lat'em;

Language contact:

### ***Calendula* (Asteraceae)**

Spanish names: Dormilón

Indigenous names: Guièe-dòrmilôn, guièe-nguëts, guièe-gùts, guièe-nàad<sup>23</sup>

Used by (1\*): Zapotec<sup>23</sup>

Used for (1#): Respiratory<sup>23</sup>

Cognates:

Language contact:

### ***Calliandra* (Fabaceae)**

Spanish names: Barba del Rey; Palo sangre; Timbre

Indigenous names: Kine nhäpin<sup>01</sup>; Kinä näpin<sup>02</sup>; Juix mooya<sup>03</sup>; Wiir'oot', xixit<sup>07</sup>; Ch'ich' ni'<sup>20</sup>

Used by (7\*): Zoque<sup>01, 02, 03</sup>; Huastec<sup>07</sup>; Quichean Maya<sup>12</sup>; Western Maya<sup>20</sup>; Nahua<sup>26</sup>

Used for (17#): Digestive<sup>02, 12, 20</sup>; Eye<sup>02, 07</sup>; Neurological<sup>07</sup>; Respiratory<sup>01, 07, 20</sup>; Skin<sup>07, 20</sup>; Urological<sup>02</sup>; Pregnancy<sup>03, 26</sup>; Female genital<sup>03</sup>; General and Unspecified<sup>03, 07</sup>

Cognates: Zoq: kine näpin; Maya: xix/chich;

Language contact: Maya > Highland Popoluca

### ***Callicarpa* (Lamiaceae)**

Spanish names:

Indigenous names: Elte', thal te'<sup>07</sup>; Xpuk'in, Puk'im<sup>09</sup>

Used by (2\*): Huastec<sup>07</sup>; Yucatecan Maya<sup>09</sup>

Used for (4#): Digestive<sup>07, 09</sup>; Urological<sup>07</sup>; Pregnancy<sup>07</sup>

Cognates:

Language contact:

### ***Callisia* (Commelinaceae)**

Spanish names:

Indigenous names: Uixpin<sup>03</sup>; Pulik utek', xutsun buuru<sup>07</sup>; Utek' de bega<sup>07</sup>

Used by (2\*): Zoque<sup>03</sup>; Huastec<sup>07</sup>

Used for (8#): Digestive<sup>03</sup>; Ear<sup>07</sup>; Cardiovascular<sup>07</sup>; Psychological<sup>07</sup>; Respiratory<sup>03</sup>; Urological<sup>07</sup>; Female genital<sup>03</sup>; General and Unspecified<sup>07</sup>

Cognates:

Language contact:

### ***Callistemon* (Myrtaceae)**

Spanish names: Enebro

Indigenous names:

Used by (1\*): Quichean Maya<sup>12</sup>

Used for (2#): Urological<sup>12</sup>; General and Unspecified<sup>12</sup>

Cognates:

Language contact:

### ***Calophyllum* (Clusiaceae)**

Spanish names: Lechemaria; Varín

Indigenous names: Ka' kuy/ kang kuy<sup>02</sup>; Mʼanakcuy<sup>03</sup>

Used by (2\*): Zoque<sup>02, 03</sup>

Used for (5#): Musculoskeletal<sup>02</sup>; Neurological<sup>03</sup>; Skin<sup>02, 03</sup>; Female genital<sup>03</sup>

Cognates:

Language contact: Chimalapa Zoq <> Highland Popoluca

### ***Calopogonium* (Fabaceae)**

Spanish names: Zempantle

Indigenous names: Btuujtza<sup>21</sup>

Used by (1\*): Zapotec<sup>21</sup>

Used for (3#): Neurological<sup>21</sup>; Psychological<sup>21</sup>; General and Unspecified<sup>21</sup>

Cognates:

Language contact:

### ***Calyptocarpus* (Asteraceae)**

Spanish names: Cabeza de zompopo, espina de gallina; Hierba Amarilla, cachito; Huango/Hoja de azar

Indigenous names: Tza'a tzoj<sup>01</sup>; Xqa'ramaq<sup>12</sup>

Used by (3\*): Zoque<sup>01</sup>; Quichean Maya<sup>12</sup>; Western Maya<sup>19</sup>

Used for (5#): Digestive<sup>12</sup>; Neurological<sup>12</sup>; Psychological<sup>12</sup>; Pregnancy<sup>19</sup>; General and Unspecified<sup>01</sup>

Cognates:

Language contact:

### ***Calyptanthes* (Myrtaceae)**

Spanish names:

Indigenous names:

Used by (1\*): Quichean Maya<sup>17</sup>

Used for (1#): nd<sup>17</sup>

Cognates:

Language contact:

### ***Camellia* (Theaceae)**

Spanish names: Té Verde

Indigenous names:

Used by (1\*): Quichean Maya<sup>12</sup>

Used for (3#): Blood<sup>12</sup>; Cardiovascular<sup>12</sup>; Musculoskeletal<sup>12</sup>

Cognates:

Language contact:

### ***Campylocentrum* (Orchidaceae)**

Spanish names:

Indigenous names: Tz'ib'oyil Q'ehen<sup>14</sup>

Used by (1\*): Quichean Maya<sup>14</sup>

Used for (1#): General and Unspecified<sup>14</sup>

Cognates:

Language contact:

### ***Campyloneurum* (Polypodiaceae)**

Spanish names: Cola de pavo; Helecho macho

Indigenous names: Cuy chimal<sup>03</sup>; wa'ub ik', wau, boo'wat, wayom ik, <sup>07</sup>; Rix i xul<sup>17</sup>

Used by (4\*): Zoque<sup>03</sup>; Huastec<sup>07</sup>; Quichean Maya<sup>15, 17</sup>

Used for (7#): Digestive<sup>03</sup>; Ear<sup>07</sup>; Cardiovascular<sup>07</sup>; Musculoskeletal<sup>15</sup>; Neurological<sup>07</sup>; General and Unspecified<sup>03</sup>; nd<sup>17</sup>

Cognates:

Language contact:

### ***Canavalia* (Fabaceae)**

Spanish names: Sacramento

Indigenous names: Xagalamenta<sup>03</sup>; Koxol wits, koxoloow, pekeleexe wich<sup>07</sup>

Used by (2\*): Zoque<sup>03</sup>; Huastec<sup>07</sup>

Used for (3#): Digestive<sup>03</sup>; Skin<sup>03, 07</sup>

Cognates:

Language contact:

### ***Canna* (Cannaceae)**

Spanish names: Cucuyus; Papatla; Papatla amarilla; Platanillo

Indigenous names: Nok ay<sup>01</sup>; ¥¥ng ay<sup>03</sup>; Ciquichi, tzu'l kuat<sup>05</sup>; Chiquichi<sup>06</sup>; K'uuwaap, tsak pik'o', tsabal wits, tabil<sup>07</sup>;

Tsokon, maxan<sup>13</sup>

Used by (6\*): Zoque<sup>01, 03</sup>; Totonac<sup>05, 06</sup>; Huastec<sup>07</sup>; Quichean Maya<sup>13</sup>

Used for (10#): Digestive<sup>07</sup>; Ear<sup>03</sup>; Musculoskeletal<sup>07</sup>; Neurological<sup>07</sup>; Skin<sup>01</sup>; Pregnancy<sup>06, 07, 13</sup>; General and Unspecified<sup>01, 05</sup>

Cognates: Tot: ciquichi;

Language contact:

### ***Cannabis* (Cannabaceae)**

Spanish names: Mariguana; Marihuana; Marijuana

Indigenous names: Jo'we ay'<sup>02</sup>; Ayuk juik<sup>04</sup>; Macutzín<sup>28</sup>

Used by (6\*): Zoque<sup>01, 02</sup>; Mixe<sup>04</sup>; Zapotec<sup>21, 22</sup>; Nahua<sup>28</sup>

Used for (11#): Musculoskeletal<sup>01, 02, 04, 21, 22, 28</sup>; Neurological<sup>02</sup>; Urological<sup>01</sup>; General and Unspecified<sup>01, 02, 21</sup>

Cognates:

Language contact:

### ***Capraria* (Scrophulariaceae)**

Spanish names: Apazote de zorrillo, sabañon; Claviosa; Epazotillo; Esclaviosa; Pasma, claviosa

Indigenous names: Kisawa ay'<sup>02</sup>; Payau<sup>04</sup>; Sqeja lipajni<sup>05</sup>; Pulik ts'itsimbe ts'ohool, weew bichim, tsamnek ts'ohool,<sup>07</sup>; Akan

t'ot, elul ts'ohool<sup>07</sup>; Chokwil-xiw<sup>09</sup>; Pas mo Ši'iu<sup>10</sup>; Badxumij<sup>21</sup>

Used by (9\*): Zoque<sup>02</sup>; Mixe<sup>04</sup>; Totonac<sup>05</sup>; Huastec<sup>07</sup>; Yucatecan Maya<sup>09, 10, 11</sup>; Western Maya<sup>18</sup>; Zapotec<sup>21</sup>

Used for (19#): Blood<sup>10</sup>; Digestive<sup>07, 09, 21</sup>; Ear<sup>09</sup>; Cardiovascular<sup>07</sup>; Musculoskeletal<sup>05, 11</sup>; Neurological<sup>07</sup>; Skin<sup>02, 04, 18, 21</sup>;

Urological<sup>11, 18</sup>; Female genital<sup>04, 07</sup>; General and Unspecified<sup>18, 21</sup>

Cognates: Yuc: xiw/xi'iu;

Language contact:

### ***Capsella* (Brassicaceae)**

Spanish names: Bolsa de Pastor

Indigenous names:

Used by (1\*): Quichean Maya<sup>12</sup>

Used for (4#): Skin<sup>12</sup>; Urological<sup>12</sup>; Female genital<sup>12</sup>; General and Unspecified<sup>12</sup>

Cognates:

Language contact:

### ***Capsicum* (Solanaceae)**

Spanish names: Chile; Chile ; Chile (menudo); Chile amashito; Chili; Chiltepe; Habanero

Indigenous names: (Nama) niwi<sup>01</sup>; Niwi<sup>02</sup>; Ńiwi<sup>03</sup>; Niiy<sup>04</sup>; Pi'n<sup>06</sup>; Its, ich<sup>07</sup>; lik<sup>10</sup>; Iq', ik<sup>13</sup>; Ik' Q'eheh, Xa'q Ik'<sup>14</sup>; Z'uts'ich<sup>18</sup>; Ich<sup>20</sup>;

Balagaguina'a<sup>21</sup>; Tlanxinal<sup>25</sup>

Used by (16\*): Zoque<sup>01, 02, 03</sup>; Mixe<sup>04</sup>; Totonac<sup>06</sup>; Huastec<sup>07</sup>; Yucatecan Maya<sup>09, 10</sup>; Quichean Maya<sup>12, 13, 14</sup>; Western Maya<sup>18, 20</sup>;

Zapotec<sup>21, 22</sup>; Nahua<sup>25</sup>

Used for (35#): Digestive<sup>12, 20</sup>; Eye<sup>06, 07, 10, 21</sup>; Ear<sup>02, 03</sup>; Neurological<sup>18</sup>; Psychological<sup>02, 04, 21</sup>; Respiratory<sup>25</sup>; Skin<sup>01, 02, 03, 06, 07, 12</sup>;

Endocrine<sup>12</sup>; Pregnancy<sup>13</sup>; Male genital<sup>02, 03</sup>; General and Unspecified<sup>01, 04, 06, 07, 09, 12, 13, 14, 18, 21, 22</sup>

Cognates: MZ: ni(w)i; Zoq: niwi; Maya: ich/ik; Quich: ik; WesM: ich;

Language contact: MZ <> Maya <> Tot <> Zap <> Nah

### **Cardamine (Brassicaceae)**

Spanish names: Hoja de azar del rio

Indigenous names: Tza'a tzoy<sup>01</sup>; T'ik'om ichiich<sup>07</sup>

Used by (2\*): Zoque<sup>01</sup>; Huastec<sup>07</sup>

Used for (2#): General and Unspecified<sup>01, 07</sup>

Cognates:

Language contact:

### **Cardiospermum (Sapindaceae)**

Spanish names: Hierba de pollo

Indigenous names:

Used by (1\*): Nahuatl<sup>28</sup>

Used for (1#): Skin<sup>28</sup>

Cognates:

Language contact:

### **Carduus (Asteraceae)**

Spanish names:

Indigenous names: Ohob ilaal<sup>07</sup>

Used by (1\*): Huastec<sup>07</sup>

Used for (2#): Musculoskeletal<sup>07</sup>; Respiratory<sup>07</sup>

Cognates:

Language contact:

### **Carica (Caricaceae)**

Spanish names: Papaya

Indigenous names: Otzo<sup>01</sup>; Tuna<sup>02</sup>; Xala'cua<sup>06</sup>; Utsun<sup>07</sup>; Put<sup>09</sup>; ČiČ pu'ut<sup>10</sup>; Tu' Q'ehen<sup>14</sup>

Used by (15\*): Zoque<sup>01, 02, 03</sup>; Mixe<sup>04</sup>; Totonac<sup>06</sup>; Huastec<sup>07</sup>; Yucatecan Maya<sup>09, 10, 11</sup>; Quichean Maya<sup>12, 13, 14</sup>; Western Maya<sup>18</sup>; Zapotec<sup>21</sup>; Nahuatl<sup>26</sup>

Used for (27#): Digestive<sup>01, 02, 03, 04, 06, 12, 13, 14, 18, 21</sup>; Neurological<sup>02, 03</sup>; Psychological<sup>02</sup>; Respiratory<sup>06</sup>; Skin<sup>03, 07, 09, 10, 11</sup>; Endocrine<sup>18</sup>; Urological<sup>02, 26</sup>; Pregnancy<sup>07</sup>; Female genital<sup>21</sup>; General and Unspecified<sup>03, 12, 21</sup>

Cognates: Yuc: put;

Language contact: Chiapas Zoq > Hua

### **Cascabela (Apocynaceae)**

Spanish names: calaverita; Chirrito; Cojon de perro; Coyol de cochi; Flor de San Juan

Indigenous names: Yoyak puj<sup>01</sup>; Ts'een aanchuuch, antsuts<sup>07</sup>; Akits<sup>09</sup>; Mbiigu<sup>21</sup>; Mbiigu' guexii<sup>21</sup>; Yoyotli<sup>28</sup>

Used by (7\*): Zoque<sup>01, 02</sup>; Huastec<sup>07</sup>; Yucatecan Maya<sup>09, 11</sup>; Zapotec<sup>21</sup>; Nahuatl<sup>28</sup>

Used for (16#): Digestive<sup>21</sup>; Cardiovascular<sup>07</sup>; Neurological<sup>02, 07, 28</sup>; Respiratory<sup>11, 21, 28</sup>; Skin<sup>01, 02, 07, 09, 21</sup>; General and Unspecified<sup>21</sup>

Cognates:

Language contact: Chiapas Zoq <> Nah; Hua <> Yuc

### **Casearia (Salicaceae)**

Spanish names:

Indigenous names: ʔkx cuy, Tajuiñi ay<sup>03</sup>; Chumak chul<sup>07</sup>; Xi'mche<sup>09</sup>

Used by (3\*): Zoque<sup>03</sup>; Huastec<sup>07</sup>; Yucatecan Maya<sup>09</sup>

Used for (7#): Respiratory<sup>07</sup>; Skin<sup>03, 07, 09</sup>; General and Unspecified<sup>09</sup>

Cognates:

Language contact: Hua <> Yuc



### **Casimiroa (Rutaceae)**

Spanish names: Matasano; Zapote blanco

Indigenous names: Yuy, Sihun<sup>09</sup>; Ajachel<sup>12</sup>; Aja te<sup>120</sup>; Yàg-ngùd-guèy<sup>23</sup>; Chipizapot<sup>28</sup>

Used by (6\*): Yucatecan Maya<sup>09</sup>; Quichean Maya<sup>12</sup>; Western Maya<sup>20</sup>; Zapotec<sup>23</sup>; Nahua<sup>25, 28</sup>

Used for (9#): Blood<sup>12</sup>; Digestive<sup>09, 20</sup>; Cardiovascular<sup>23, 25</sup>; Musculoskeletal<sup>09</sup>; Respiratory<sup>09</sup>; Pregnancy<sup>28</sup>; General and Unspecified<sup>09</sup>

Cognates: CoreM: aja;

Language contact:

### **Cassia (Fabaceae)**

Spanish names: Caña fista; Caña fistula ; Cañafistola; Cañafistula; Citiso Laburno

Indigenous names: Tzum kuy<sup>02</sup>; Tsapt tsina'an<sup>04</sup>; Bocut<sup>10</sup>; Q'en Q'echa Kineq' Aq'om<sup>12</sup>; Oj fistula<sup>18</sup>

Used by (9\*): Zoque<sup>01, 02, 03</sup>; Mixe<sup>04</sup>; Yucatecan Maya<sup>10</sup>; Quichean Maya<sup>12</sup>; Western Maya<sup>18, 19</sup>; Zapotec<sup>21</sup>

Used for (29#): Blood<sup>10, 12</sup>; Digestive<sup>01, 02, 04, 18</sup>; Cardiovascular<sup>12</sup>; Musculoskeletal<sup>02, 12</sup>; Neurological<sup>12</sup>; Psychological<sup>12</sup>; Respiratory<sup>01, 02, 03, 04, 18, 21</sup>; Skin<sup>10, 12</sup>; Endocrine<sup>12</sup>; Urological<sup>02, 12</sup>; Pregnancy<sup>02</sup>; Female genital<sup>02</sup>; General and Unspecified<sup>02, 03, 04, 19, 21</sup>

Cognates:

Language contact:

### **Castela (Simaroubaceae)**

Spanish names: Chaparro amargoso; Venenillo

Indigenous names:

Used by (2\*): Zoque<sup>01</sup>; Nahua<sup>27</sup>

Used for (4#): Digestive<sup>01</sup>; Cardiovascular<sup>27</sup>; Psychological<sup>27</sup>; Endocrine<sup>27</sup>

Cognates:

Language contact:

### **Castilla (Moraceae)**

Spanish names: Ule

Indigenous names: Peem<sup>07</sup>

Used by (2\*): Huastec<sup>07</sup>; Yucatecan Maya<sup>10</sup>

Used for (4#): Musculoskeletal<sup>07, 10</sup>; Neurological<sup>07</sup>; Skin<sup>07</sup>

Cognates:

Language contact:

### **Castilleja (Orobanchaceae)**

Spanish names:

Indigenous names: Elul ts'ohool, ehtiił hu'tut wuts, k'ak'al wits, akan t'ele' del monte, pulek bohól ch'ohool<sup>07</sup>

Used by (2\*): Zoque<sup>03</sup>; Huastec<sup>07</sup>

Used for (5#): Digestive<sup>03, 07</sup>; Neurological<sup>07</sup>; Pregnancy<sup>07</sup>; Female genital<sup>07</sup>

Cognates:

Language contact:

### **Catasetum (Orchidaceae)**

Spanish names:

Indigenous names: Ch'itku'uk<sup>09</sup>

Used by (1\*): Yucatecan Maya<sup>09</sup>

Used for (2#): Musculoskeletal<sup>09</sup>; Skin<sup>09</sup>

Cognates:

Language contact:

### ***Catharanthus* (Apocynaceae)**

Spanish names: Chatilla; Ninfa; Paraguaita; Paraguita; Vicaria

Indigenous names: Ninfax<sup>03</sup>

Used by (7\*): Zoque<sup>01, 02, 03</sup>; Yucatecan Maya<sup>09, 11</sup>; Western Maya<sup>18</sup>; Zapotec<sup>21</sup>

Used for (18#): Digestive<sup>02, 03, 21</sup>; Eye<sup>18</sup>; Musculoskeletal<sup>02</sup>; Neurological<sup>03</sup>; Respiratory<sup>18</sup>; Skin<sup>18, 21</sup>; Endocrine<sup>18</sup>; Pregnancy<sup>03</sup>; Female genital<sup>02, 03, 09</sup>; General and Unspecified<sup>01, 18, 21</sup>

Cognates:

Language contact:

### ***Catopsis* (Bromeliaceae)**

Spanish names: Piñita

Indigenous names:

Used by (1\*): Zoque<sup>03</sup>

Used for (1#): Female genital<sup>03</sup>

Cognates:

Language contact:

### ***Cayaponia* (Cucurbitaceae)**

Spanish names: Hierba del soldado

Indigenous names: Wit po't<sup>04</sup>; Takeeyl<sup>09</sup>; Shuana'a soldadu<sup>21</sup>

Used by (3\*): Mixe<sup>04</sup>; Yucatecan Maya<sup>09</sup>; Zapotec<sup>21</sup>

Used for (4#): Digestive<sup>21</sup>; Skin<sup>04, 09</sup>; General and Unspecified<sup>21</sup>

Cognates:

Language contact:

### ***Ceanothus* (Rhamnaceae)**

Spanish names: Charín

Indigenous names: Tatanatzin<sup>28</sup>

Used by (2\*): Quichean Maya<sup>12</sup>; Nahua<sup>28</sup>

Used for (3#): Digestive<sup>12, 28</sup>; Skin<sup>28</sup>

Cognates:

Language contact:

### ***Cecropia* (Urticaceae)**

Spanish names: Chancarro; Guarrumbo; Guarumbo; Guarumbo, chancarro; Guarumo; Hormiguillo; Palo chiflón

Indigenous names: Ma'atz kuy/ma'atza /maatsy kuy<sup>01</sup>; Watz, boron kuy, syi wangpo', shy wonhko<sup>02</sup>; Mats<sup>03</sup>; Joot<sup>04</sup>;

Akowa<sup>05</sup>; AA 'koo hua<sup>06</sup>; Tsulte<sup>07</sup>; Xk'oochle<sup>09</sup>; Aq'poo'jor, Po'jor<sup>14</sup>; Ha'ql<sup>14</sup>; Ajc'oloc<sup>18</sup>; Chojb<sup>19</sup>; Yagaba'aj<sup>21</sup>

Used by (16\*): Zoque<sup>01, 02, 03, 25, 26</sup>; Mixe<sup>04</sup>; Totonac<sup>05, 06</sup>; Huastec<sup>07</sup>; Yucatecan Maya<sup>09, 11</sup>; Quichean Maya<sup>14, 15</sup>; Western Maya<sup>18, 19</sup>; Zapotec<sup>21</sup>; Nahua<sup>25, 26</sup>

Used for (60#): Digestive<sup>01, 02, 03, 21, 25</sup>; Ear<sup>01, 03</sup>; Cardiovascular<sup>02, 18</sup>; Musculoskeletal<sup>01, 02, 04, 11, 21</sup>; Psychological<sup>01, 03, 15, 18</sup>; Respiratory<sup>01, 03, 21, 26</sup>; Skin<sup>01, 02, 03, 07, 11, 18, 21</sup>; Endocrine<sup>01, 02, 03, 04, 05, 06, 18, 21, 25, 26</sup>; Urological<sup>01, 02, 09, 26</sup>; Pregnancy<sup>01, 14, 15, 19</sup>;

Female genital<sup>01, 02, 03, 21</sup>; Male genital<sup>02</sup>; General and Unspecified<sup>01, 02, 03, 04, 14, 21</sup>

Cognates: Zoq: mats; Tot: akowa;

Language contact: Tot <> Tabasco Chontal & Kekchí & Yuc

### ***Cedrela* (Meliaceae)**

Spanish names: Cedrillo, Cedro; Cedro; Cedro hembra

Indigenous names: A' kuy/ aj kuy<sup>01</sup>; Aja kuy/masya kuy<sup>02</sup>; Acuy<sup>03</sup>; Ajk<sup>04</sup>; Lištankiwi, pušnankiwi<sup>05</sup>; Ik'te<sup>07</sup>; Nawal Che'

Aq'om<sup>12</sup>; Rix Yaw Che<sup>14</sup>; Ch'ujte<sup>18</sup>; Yagadoo<sup>21</sup>; Yäg-sîdr<sup>23</sup>

Used by (13\*): Zoque<sup>01, 02, 03</sup>; Mixe<sup>04</sup>; Totonac<sup>05</sup>; Huastec<sup>07</sup>; Yucatecan Maya<sup>09, 10</sup>; Quichean Maya<sup>12, 14</sup>; Western Maya<sup>18</sup>; Zapotec<sup>21, 23</sup>

Used for (46#): Blood<sup>01, 07, 12</sup>; Digestive<sup>01, 02, 03, 23</sup>; Cardiovascular<sup>12</sup>; Musculoskeletal<sup>01, 02, 03, 12, 21</sup>; Neurological<sup>01, 02, 07, 12</sup>;

Psychological<sup>05, 07</sup>; Respiratory<sup>01, 07, 21</sup>; Skin<sup>01, 03, 07, 10, 12, 14, 21</sup>; Endocrine<sup>01, 02</sup>; Urological<sup>01, 03</sup>; Pregnancy<sup>03, 18</sup>; Female genital<sup>03</sup>;

09, 12; General and Unspecified<sup>01, 03, 04, 05, 07, 12, 18, 21</sup>

Cognates: MZ: ajk; Zoq: a(j) kuy;

Language contact: MZ > Tot & Hua

### ***Ceiba* (Malvaceae)**

Spanish names: Ceiba; Pochote

Indigenous names: Pixtyiñ<sup>03</sup>; Pix ti'ink<sup>04</sup>; Unup<sup>07</sup>; Pi'im<sup>09</sup>; Ya'axche<sup>09</sup>; Ch'ixirte<sup>18</sup>; Biuug<sup>21</sup>; Yaga shiene'e<sup>21</sup>

Used by (7\*): Zoque<sup>03</sup>; Mixe<sup>04</sup>; Huastec<sup>07</sup>; Yucatecan Maya<sup>09</sup>; Western Maya<sup>18</sup>; Zapotec<sup>21</sup>; Naha<sup>27</sup>

Used for (18#): Digestive<sup>21, 27</sup>; Eye<sup>09</sup>; Musculoskeletal<sup>09</sup>; Skin<sup>03, 04, 07, 09, 21, 27</sup>; Endocrine<sup>18, 27</sup>; Urological<sup>27</sup>; Pregnancy<sup>21</sup>;

General and Unspecified<sup>07, 21, 27</sup>

Cognates: MZ: pixtin;

Language contact: MZ <> Yuc

### ***Celosia* (Amaranthaceae)**

Spanish names: Mano de leon / Cresta de gallo; Moco de chunto

Indigenous names: Cundauajo<sup>03</sup>; Sam' ak'ach<sup>14</sup>

Used by (2\*): Zoque<sup>03</sup>; Quichean Maya<sup>14</sup>

Used for (2#): Blood<sup>14</sup>; Female genital<sup>03</sup>

Cognates:

Language contact:

### ***Celtis* (Cannabaceae)**

Spanish names:

Indigenous names: Thak loh<sup>07</sup>

Used by (1\*): Huastec<sup>07</sup>

Used for (2#): Skin<sup>07</sup>; General and Unspecified<sup>07</sup>

Cognates:

Language contact:

### ***Cenchrus* (Poaceae)**

Spanish names:

Indigenous names: T'oyol k'iith, t'oyol toom<sup>07</sup>

Used by (1\*): Huastec<sup>07</sup>

Used for (5#): Digestive<sup>07</sup>; Psychological<sup>07</sup>; Urological<sup>07</sup>; Pregnancy<sup>07</sup>; General and Unspecified<sup>07</sup>

Cognates:

Language contact:

### ***Centratherum* (Asteraceae)**

Spanish names: Serpentina morada; Violeta de maceta

Indigenous names:

Used by (2\*): Zoque<sup>03</sup>; Naha<sup>26</sup>

Used for (3#): Respiratory<sup>26</sup>; Skin<sup>26</sup>; Pregnancy<sup>03</sup>

Cognates:

Language contact:

### ***Centropogon* (Campanulaceae)**

Spanish names:

Indigenous names: Ayuni/putpa' tane<sup>01</sup>

Used by (1\*): Zoque<sup>01</sup>

Used for (1#): Skin<sup>01</sup>

Cognates:

Language contact:

### ***Centrosema* (Fabaceae)**

Spanish names: Chureque

Indigenous names: Hik'elom ts'olool, lantha xeklek<sup>07</sup>; Buy-ak<sup>09</sup>

Used by (4\*): Zoque<sup>03</sup>; Huastec<sup>07</sup>; Yucatecan Maya<sup>09</sup>; Quichean Maya<sup>12</sup>

Used for (8#): Digestive<sup>03, 12</sup>; Eye<sup>09</sup>; Psychological<sup>03</sup>; Skin<sup>09</sup>; Endocrine<sup>12</sup>; General and Unspecified<sup>07</sup>

Cognates:

Language contact:

### ***Cerastium* (Caryophyllaceae)**

Spanish names: Hoja de azar

Indigenous names: Tza'a tzoy<sup>01</sup>

Used by (1\*): Zoque<sup>01</sup>

Used for (1#): General and Unspecified<sup>01</sup>

Cognates:

Language contact:

### ***Ceratozamia* (Zamiaceae)**

Spanish names: Palmito

Indigenous names: Cuni<sup>06</sup>; Konlib<sup>07</sup>

Used by (2\*): Totonac<sup>06</sup>; Huastec<sup>07</sup>

Used for (2#): Respiratory<sup>06</sup>; Urological<sup>07</sup>

Cognates:

Language contact: Tot <> Hua

### ***Cestrum* (Solanaceae)**

Spanish names: Boton zhiwite; Flor de goñon, huele de noche, jiquilete de monte, chilca de monte, sacate negro; Hierba de la Bilis, Hierba Morada; Hierba del torro; Hoja helionanda; Huele de noche; Huele noche; Juan de noche; Matabuey; Orcajuda; Orcajuda negra

Indigenous names: Wujpa ay<sup>01</sup>; Mok xoxay<sup>03</sup>; Tzisnutuwan, tzisni šanat<sup>05</sup>; Tsabalte<sup>07</sup>; Ehek tsabalte', it'iib to'ol<sup>07</sup>;

Tsabalte<sup>08</sup>; Ehek tsabalte<sup>08</sup>; Q'enqoj K'ay Q'os Aq'om<sup>12</sup>; Choanum, quispar chuq'ies, xapakpan<sup>13</sup>; Xu Che<sup>14</sup>; Rax ipaj, Xna ipaj<sup>14</sup>; Patonšiwit<sup>22</sup>; Yäg-guièe-zhñ, bôtòn-xiwit<sup>23</sup>; Nixtamaxihuitl<sup>25</sup>; Ehepacxihuitl<sup>26</sup>

Used by (15\*): Zoque<sup>01, 02, 03</sup>; Totonac<sup>05</sup>; Huastec<sup>07, 08</sup>; Yucatecan Maya<sup>09</sup>; Quichean Maya<sup>12, 13, 14</sup>; Zapotec<sup>22, 23</sup>; Nahua<sup>25, 26, 28</sup>

Used for (46#): Digestive<sup>12, 13, 14, 22</sup>; Musculoskeletal<sup>08, 13</sup>; Neurological<sup>01, 07, 08, 22, 23, 25, 28</sup>; Psychological<sup>07</sup>; Respiratory<sup>07, 08, 13</sup>; Skin<sup>03, 07, 09, 25, 28</sup>; Endocrine<sup>02, 14</sup>; Urological<sup>07</sup>; Pregnancy<sup>03, 05, 07</sup>; Female genital<sup>03</sup>; Male genital<sup>14</sup>; General and Unspecified<sup>03, 05, 07, 08, 09, 12, 13, 14, 23, 25, 26</sup>

Cognates: Hua: ehek tsabalte; Zap: pVtonxiwit; Nah: axihuitl;

Language contact:

### ***Chaetocalyx* (Fabaceae)**

Spanish names:

Indigenous names: Mʼkstogay tsay<sup>03</sup>

Used by (1\*): Zoque<sup>03</sup>

Used for (2#): Digestive<sup>03</sup>; Skin<sup>03</sup>

Cognates:

Language contact:

### ***Chamaecrista* (Fabaceae)**

Spanish names: Hoja de burbua; Hoja sen; Ortiga

Indigenous names: Kojotzik ay / kotzäk ay<sup>02</sup>; Copa uaxiñ<sup>03</sup>; Hitxi sotyi<sup>03</sup>; Sen ay<sup>04</sup>; Salatxiw, Salat-ik<sup>09</sup>; Guixa'a sen<sup>21</sup>

Used by (5\*): Zoque<sup>02, 03</sup>; Mixe<sup>04</sup>; Yucatecan Maya<sup>09</sup>; Zapotec<sup>21</sup>

Used for (19#): Digestive<sup>02, 03, 21</sup>; Eye<sup>03, 09</sup>; Skin<sup>03, 21</sup>; Urological<sup>03</sup>; Pregnancy<sup>02, 21</sup>; Female genital<sup>02, 03, 04, 21</sup>; General and Unspecified<sup>04, 21</sup>

Cognates:

Language contact:

### ***Chamaedorea* (Arecaceae)**

Spanish names: Chiquilote; Pacaya; Tepejilote; Tepejilote, tepexilot

Indigenous names: Pampi<sup>03</sup>; Chikx pampi<sup>03</sup>; Liljtampán, litumpajna<sup>05</sup>; Weew bat'aw, thokob santu<sup>07</sup>; Gue'etzu'u<sup>21</sup>; Tepechilote<sup>26</sup>

Used by (6\*): Zoque<sup>03</sup>; Totonac<sup>05</sup>; Huastec<sup>07</sup>; Quichean Maya<sup>12</sup>; Zapotec<sup>21</sup>; Nahua<sup>26</sup>

Used for (18#): Blood<sup>12</sup>; Digestive<sup>12, 21, 26</sup>; Psychological<sup>07</sup>; Respiratory<sup>03, 12</sup>; Skin<sup>07, 12, 21, 26</sup>; Endocrine<sup>12</sup>; Pregnancy<sup>12</sup>; General and Unspecified<sup>03, 05, 12, 21</sup>

Cognates:

Language contact:

### ***Chaptalia* (Asteraceae)**

Spanish names: Diente de león; Hoja de dos colores; Lengua de chivo; Lengua de perro

Indigenous names: Tzyivu totz<sup>01</sup>; Ai'jäs poti<sup>02</sup>; Jeepe ay, Nuup kobak<sup>03</sup>; Yo'opky piig ujts<sup>04</sup>; Tsakam yehtsel, ehtiil i k'ubak kw'a, alte' lopeen<sup>07</sup>; Rujiraq'i Tz'i'<sup>14</sup>; Guish lay león<sup>21</sup>

Used by (7\*): Zoque<sup>01, 02, 03</sup>; Mixe<sup>04</sup>; Huastec<sup>07</sup>; Quichean Maya<sup>14</sup>; Zapotec<sup>21</sup>

Used for (16#): Digestive<sup>03, 14, 21</sup>; Eye<sup>02, 07</sup>; Musculoskeletal<sup>01</sup>; Neurological<sup>04</sup>; Psychological<sup>03, 14</sup>; Respiratory<sup>14</sup>; Skin<sup>03, 04</sup>; Urological<sup>03, 14</sup>; Pregnancy<sup>03</sup>; General and Unspecified<sup>07</sup>

Cognates: MZ: yo'op/jeepe/jäspo;

Language contact: MZ > Hua

### ***Cheilanthes* (Pteridaceae)**

Spanish names: Culandrillo

Indigenous names:

Used by (1\*): Quichean Maya<sup>13</sup>

Used for (1#): Neurological<sup>13</sup>

Cognates:

Language contact:

### ***Chelonanthus* (Gentianaceae)**

Spanish names: Lengua de vaca

Indigenous names:

Used by (1\*): Zoque<sup>02</sup>

Used for (1#): Skin<sup>02</sup>

Cognates:

Language contact:

### ***Chenopodium* (Amaranthaceae)**

Spanish names: Apacín; Apazote zorro; Bledo, Amaranto; Chagaquelite; Epazote de monte, epazote de zorrillo; Epazote de zorrillo; Hierba de zorrillo; Yerba de guajilote

Indigenous names: Sa 'kalkha'jna<sup>06</sup>; Lob'i tzet<sup>12</sup>; Ka'i's par', par q'os<sup>12</sup>; Sik'aj par, uskaj par<sup>13</sup>; Škwam behd<sup>22</sup>; Guizh-mèt, ptiè-mèt<sup>23</sup>

Used by (7\*): Totonac<sup>05, 06</sup>; Quichean Maya<sup>12, 13</sup>; Zapotec<sup>22, 23</sup>; Nahua<sup>27</sup>

Used for (17#): Digestive<sup>05, 06, 13, 23</sup>; Cardiovascular<sup>12</sup>; Respiratory<sup>12</sup>; Skin<sup>12, 22</sup>; Urological<sup>12</sup>; Pregnancy<sup>13</sup>; Female genital<sup>13, 23</sup>; General and Unspecified<sup>12, 13, 27</sup>

Cognates: Quich: ka'i/kaj par; Zap: Cet;

Language contact: Tot <> Quich

### ***Chimaphila* (Ericaceae)**

Spanish names: Hierba del sapo

Indigenous names: Ka'che, p'jal q'ix<sup>13</sup>

Used by (1\*): Quichean Maya<sup>13</sup>

Used for (1#): General and Unspecified<sup>13</sup>

Cognates:

Language contact:

### ***Chiococca* (Rubiaceae)**

Spanish names: Moste cimarrón; Sorrillo; Tamagás

Indigenous names: Majei muts<sup>03</sup>; Puut' ts'aah, te' laab te<sup>107</sup>; Chimes-kas, Xiax-al<sup>109</sup>; Ix ak'à jauay<sup>11</sup>; Pahar i pim<sup>17</sup>; Xin-bèch-mbär<sup>23</sup>

Used by (7\*): Zoque<sup>03</sup>; Huastec<sup>07</sup>; Yucatecan Maya<sup>09, 11</sup>; Quichean Maya<sup>17</sup>; Western Maya<sup>19</sup>; Zapotec<sup>23</sup>

Used for (17#): Digestive<sup>03, 11, 19</sup>; Musculoskeletal<sup>107, 11</sup>; Neurological<sup>103</sup>; Psychological<sup>03</sup>; Respiratory<sup>03</sup>; Skin<sup>03, 09, 23</sup>; Pregnancy<sup>19</sup>; Female genital<sup>19</sup>; General and Unspecified<sup>03, 07, 11</sup>; nd<sup>17</sup>

Cognates: Yuc: i(a)xa;

Language contact:

### ***Chionolaena* (Asteraceae)**

Spanish names: Gordolobo hembra

Indigenous names: Saq' Mak'el Q'os<sup>12</sup>

Used by (1\*): Quichean Maya<sup>12</sup>

Used for (2#): Respiratory<sup>12</sup>; Skin<sup>12</sup>

Cognates:

Language contact:

### ***Chiranthodendron* (Malvaceae)**

Spanish names: Manita; Manita de león; Mano de león

Indigenous names: K'ubak k'wa<sup>108</sup>; Q'anaq<sup>112</sup>; Yàg-làz<sup>23</sup>

Used by (3\*): Huastec<sup>08</sup>; Quichean Maya<sup>12</sup>; Zapotec<sup>23</sup>

Used for (8#): Digestive<sup>08</sup>; Cardiovascular<sup>08, 12</sup>; Musculoskeletal<sup>108</sup>; Neurological<sup>108</sup>; Psychological<sup>12</sup>; Respiratory<sup>23</sup>; Skin<sup>08</sup>

Cognates:

Language contact:

### ***Chloroleucon* (Fabaceae)**

Spanish names:

Indigenous names: Xiax-ek<sup>109</sup>

Used by (1\*): Yucatecan Maya<sup>09</sup>

Used for (1#): Skin<sup>09</sup>

Cognates:

Language contact:

### ***Chromolaena* (Asteraceae)**

Spanish names: Flor de gas, hoja petrolio; Prodigiosa, hoja de cruz; Venadillo

Indigenous names: Tam juñi<sup>03</sup>; Ehek witsiim, t'unu' witsiim<sup>07</sup>; Krus tok'te', tsamnek ts'ohool, thi'al t'eel<sup>07</sup>; Tok'aban<sup>09</sup>; Hatz<sup>11</sup>;

Sakil sak ba te<sup>20</sup>; Guish crush<sup>21</sup>; Guish petrol<sup>21</sup>

Used by (8\*): Zoque<sup>03</sup>; Huastec<sup>07</sup>; Yucatecan Maya<sup>09, 11</sup>; Quichean Maya<sup>17</sup>; Western Maya<sup>19, 20</sup>; Zapotec<sup>21</sup>

Used for (17#): Digestive<sup>03, 07, 19, 20, 21</sup>; Musculoskeletal<sup>11</sup>; Neurological<sup>07</sup>; Psychological<sup>07</sup>; Respiratory<sup>07</sup>; Skin<sup>07, 21</sup>;

Endocrine<sup>09</sup>; Urological<sup>09</sup>; General and Unspecified<sup>07, 11</sup>; nd<sup>17</sup>

Cognates:

Language contact:

### ***Chrysobalanus* (Chrysobalanaceae)**

Spanish names: Caco

Indigenous names:

Used by (1\*): Zoque<sup>02</sup>

Used for (1#): Digestive<sup>02</sup>

Cognates:

Language contact:

### ***Chrysophyllum* (Sapotaceae)**

Spanish names: Caimito silvestre

Indigenous names: Ajiya<sup>03</sup>; Chi'keeh<sup>09</sup>

Used by (2\*): Zoque<sup>03</sup>; Yucatecan Maya<sup>09</sup>

Used for (4#): Digestive<sup>03, 09</sup>; Skin<sup>03</sup>; Female genital<sup>03</sup>

Cognates:

Language contact:

### ***Chrysopogon* (Poaceae)**

Spanish names: Valeriana

Indigenous names:

Used by (1\*): Zoque<sup>01</sup>

Used for (1#): Digestive<sup>01</sup>

Cognates:

Language contact:

### ***Cichorium* (Asteraceae)**

Spanish names: Achicoria, Intibina

Indigenous names:

Used by (1\*): Quichean Maya<sup>12</sup>

Used for (6#): Blood<sup>12</sup>; Digestive<sup>12</sup>; Skin<sup>12</sup>; Endocrine<sup>12</sup>; Urological<sup>12</sup>; General and Unspecified<sup>12</sup>

Cognates:

Language contact:

### ***Cinchona* (Rubiaceae)**

Spanish names: Quina

Indigenous names: Saq'i Che' / Saq Paau<sup>14</sup>

Used by (1\*): Quichean Maya<sup>14</sup>

Used for (4#): Digestive<sup>14</sup>; Endocrine<sup>14</sup>; Female genital<sup>14</sup>; General and Unspecified<sup>14</sup>

Cognates:

Language contact:

### ***Cinnamomum* (Lauraceae)**

Spanish names: Canela; Rosa negra

Indigenous names: Contra moko<sup>03</sup>; Tsaayleel ohte<sup>07</sup>

Used by (14\*): Zoque<sup>01, 02, 03</sup>; Mixe<sup>04</sup>; Totonac<sup>06</sup>; Huastec<sup>07</sup>; Quichean Maya<sup>12, 13, 14</sup>; Western Maya<sup>18, 19</sup>; Zapotec<sup>21</sup>; Nahua<sup>25, 26</sup>

Used for (56#): Digestive<sup>01, 02, 03, 04, 06, 12, 18, 19, 21</sup>; Eye<sup>02</sup>; Cardiovascular<sup>02</sup>; Musculoskeletal<sup>02, 12</sup>; Neurological<sup>12, 18</sup>;

Psychological<sup>02, 12</sup>; Respiratory<sup>01, 02, 03, 06, 12, 13, 18, 19, 21, 25, 26</sup>; Skin<sup>03, 18, 25</sup>; Endocrine<sup>01</sup>; Urological<sup>01</sup>; Pregnancy<sup>01, 03, 06, 13, 14, 18, 19, 21,</sup>

<sup>25</sup>; Female genital<sup>02, 04, 14, 18, 19</sup>; General and Unspecified<sup>02, 03, 07, 12, 13, 14, 18, 21</sup>

Cognates:

Language contact:

### ***Cionosicyos* (Cucurbitaceae)**

Spanish names:

Indigenous names: Kasam<sup>09</sup>

Used by (1\*): Yucatecan Maya<sup>09</sup>

Used for (1#): Skin<sup>09</sup>

Cognates:

Language contact:

### ***Cirsium* (Asteraceae)**

Spanish names: Alcachofa; Cardo santo; Cardosanto

Indigenous names: Awin tsäpä<sup>01</sup>; Cholich<sup>07</sup>; Sak' q'ix<sup>12</sup>; Kix' che', ukix che'<sup>13</sup>; Tepehuitzo<sup>26</sup>

Used by (7\*): Zoque<sup>01, 03</sup>; Huastec<sup>07</sup>; Quichean Maya<sup>12, 13</sup>; Nahua<sup>25, 26</sup>

Used for (28#): Blood<sup>12</sup>; Digestive<sup>03, 07, 12, 13</sup>; Cardiovascular<sup>12</sup>; Musculoskeletal<sup>07, 12, 13</sup>; Neurological<sup>12</sup>; Psychological<sup>12</sup>; Respiratory<sup>03, 07, 13</sup>; Skin<sup>01, 03</sup>; Endocrine<sup>12</sup>; Urological<sup>12, 25, 26</sup>; Pregnancy<sup>26</sup>; Male genital<sup>12</sup>; General and Unspecified<sup>12, 25</sup>

Cognates: Maya: ich/ix; Quich: kix;

Language contact:

### ***Cissampelos* (Menispermaceae)**

Spanish names: Alcotán; Bejuco de ombligo; Bejuco zorrillo; Bejuquillo; Cintzo; Curalina ; Nonacal; Oreja de ratön; Redondillo

Indigenous names: Taka ime/ tzana ay<sup>01</sup>; Tyifí woyo<sup>03</sup>; Poop axtaam pikx<sup>04</sup>; K'on k'ach, walik ts'ohool, ichiichbe ts'ohool, uxum ichich, xuts ts'ohool, bok'ool ch'ohool<sup>07</sup>; Peteltun<sup>09</sup>; Sison' u'u<sup>14</sup>; Ch'up i ai<sup>17</sup>; Ajbejcuo a'uch<sup>18</sup>; Chin ak' wamal, voy chij vomol, voy chij tz'i'lel, yaxal nixh vomol, tz'urupik' vomol, kurarina, pak chak, makmak chak', chin ak'<sup>20</sup>; Cintzo<sup>25</sup>

Used by (14\*): Zoque<sup>01, 03</sup>; Mixe<sup>04</sup>; Totonac<sup>05</sup>; Huastec<sup>07</sup>; Yucatecan Maya<sup>09, 11</sup>; Quichean Maya<sup>14, 15, 17</sup>; Western Maya<sup>18, 19, 20</sup>; Nahua<sup>25</sup>

Used for (26#): Digestive<sup>01, 03, 04, 07, 09, 19, 20</sup>; Cardiovascular<sup>14</sup>; Respiratory<sup>03</sup>; Skin<sup>01, 03, 05, 20</sup>; Endocrine<sup>01</sup>; Pregnancy<sup>15, 20</sup>; Female genital<sup>03</sup>; General and Unspecified<sup>05, 07, 11, 14, 18, 25</sup>; nd<sup>17</sup>

Cognates:

Language contact:

### ***Cissus* (Vitaceae)**

Spanish names: Bejuco loco; Pata de Hamaca; Sanatodo; Uva cimarron, san julas

Indigenous names: Chikxsay<sup>03</sup>; Omisal<sup>05</sup>; Yax tsamnek<sup>07</sup>; Yax tsamnek, yax tsaah, pulik wako, k'apwal huuchul,<sup>07</sup>; Cruz ojo xiw<sup>09</sup>; Roq' Ab<sup>14</sup>; Rok' ha'b<sup>17</sup>; Baladxi'i guexii, elbue sang'laash<sup>21</sup>; Blàg-pâsm, lbæ-pâsm, guizh-pâsm<sup>23</sup>

Used by (9\*): Zoque<sup>03</sup>; Totonac<sup>05</sup>; Huastec<sup>07</sup>; Yucatecan Maya<sup>09</sup>; Quichean Maya<sup>14, 17</sup>; Western Maya<sup>18</sup>; Zapotec<sup>21, 23</sup>

Used for (14#): Digestive<sup>09</sup>; Eye<sup>21</sup>; Musculoskeletal<sup>05</sup>; Skin<sup>03, 05, 07, 14, 18, 21</sup>; General and Unspecified<sup>07, 21, 23</sup>; nd<sup>17</sup>

Cognates: Maya: kap; Quich: rok'ab;

Language contact:

### ***Citharexylum* (Verbenaceae)**

Spanish names:

Indigenous names: Wal to'ol te', ist'am te', ehtii i tsak te',<sup>07</sup>

Used by (1\*): Huastec<sup>07</sup>

Used for (1#): Musculoskeletal<sup>07</sup>

Cognates:

Language contact:

### ***Citrullus* (Cucurbitaceae)**

Spanish names: Sandía

Indigenous names: Mono<sup>02</sup>; Xandia<sup>03</sup>

Used by (4\*): Zoque<sup>02, 03</sup>; Quichean Maya<sup>12</sup>; Western Maya<sup>18</sup>

Used for (5#): Digestive<sup>03</sup>; General and Unspecified<sup>02, 03, 12, 18</sup>

Cognates:

Language contact:



## ***Citrus* (Rutaceae)**

Spanish names: Cajera; Cidra; Lima; Lima, cedra; Limón; Limón agria; Limón agrío; Limón criollo; Limoncillo; Mandarina; Naranja; Naranja agria; Naranja agria/cuxa; Naranja cajera; Naranja dulce; Naranja grey; Nranja agría; Pomela; Sidra; Toronja

Indigenous names: Katzu Tzyina/nanasya/ täme ay<sup>01</sup>; Limones/katzu<sup>01</sup>; China/pos<sup>01</sup>; Imunisy/Tzunakat<sup>02</sup>; Anasa/anasya<sup>02</sup>; Anasa katzu/ansya katzu<sup>02</sup>; Tsootso<sup>03</sup>; Apitx cuy<sup>03</sup>; Tsøpox<sup>04</sup>; Tsuik<sup>04</sup>; Škeja lašuš<sup>05</sup>; Laaxux<sup>06</sup>; Limuunix, xucut<sup>06</sup>; Thimallon lanaax, hiliy lanaax<sup>07</sup>; Hiliy limoon<sup>07</sup>; Chuuchu' liima<sup>07</sup>; Liima<sup>07</sup>; Chuuchu lima<sup>08</sup>; Tzon te lima<sup>08</sup>; Lanash<sup>08</sup>; Pak'aal<sup>09</sup>; China<sup>09</sup>; Paäk'al<sup>10</sup>; Limonix<sup>12</sup>; Alan<sup>12</sup>; Alanxax<sup>13</sup>; Re' li be<sup>14</sup>; Xaq i'chi'in<sup>16</sup>; Lamux<sup>16</sup>; Pajäl aranax<sup>18</sup>; Paj'limon<sup>18</sup>; Pajen cajera<sup>18</sup>; Aranax<sup>18</sup>; Pajen grey<sup>18</sup>; Ermunex<sup>20</sup>; Narax<sup>20</sup>; Cuanani'ij<sup>21</sup>; Naraxa guayu'u<sup>21</sup>; Naraxa<sup>21</sup>; Yäg-lîm<sup>23</sup>; Yäg-nârânj<sup>23</sup>; Chilcoztic<sup>28</sup>

Used by (25\*): Zoque<sup>01, 02, 03</sup>; Mixe<sup>04</sup>; Totonac<sup>05, 06</sup>; Huastec<sup>07, 08</sup>; Yucatecan Maya<sup>09, 10, 11</sup>; Quichean Maya<sup>12, 13, 14, 15, 16</sup>;

Western Maya<sup>18, 19, 20</sup>; Zapotec<sup>21, 22, 23</sup>; Nahua<sup>25, 26, 28</sup>

Used for (288#): Blood<sup>12</sup>; Digestive<sup>01, 02, 03, 04, 06, 07, 08, 09, 11, 12, 13, 18, 19, 20, 21, 22, 23, 25, 26, 28</sup>; Eye<sup>01, 02, 06, 12, 13, 14, 21, 22</sup>; Ear<sup>01</sup>;

Cardiovascular<sup>01, 02, 03, 06, 08, 10, 11, 12, 18, 28</sup>; Musculoskeletal<sup>01, 03, 06, 07, 08, 12, 14, 15, 19, 23</sup>; Neurological<sup>01, 02, 03, 12, 13, 18, 19, 21</sup>;

Psychological<sup>01, 02, 03, 06, 07, 08, 11, 12, 13, 15, 16, 18, 19, 21, 26</sup>; Respiratory<sup>01, 02, 03, 04, 06, 07, 08, 09, 10, 12, 13, 14, 18, 19, 21, 25, 28</sup>; Skin<sup>01, 02, 03, 04, 07, 12, 13, 14</sup>;

Endocrine<sup>01, 02, 06, 12, 18, 23, 25</sup>; Urological<sup>01, 02, 06, 12, 13, 18, 19, 25</sup>; Pregnancy<sup>02, 03, 04, 06, 13, 14, 19, 21, 22, 23</sup>; Female genital<sup>01, 03, 12, 13, 19</sup>;

Male genital<sup>02, 03</sup>; General and Unspecified<sup>01, 02, 03, 04, 05, 06, 07, 08, 10, 11, 12, 13, 14, 15, 18, 19, 21, 22, 23, 25, 26</sup>

Cognates:

Language contact:

## ***Cladocolea* (Loranthaceae)**

Spanish names:

Indigenous names: Guièe-ló-yâg-guièts, guièe-ló-yâg-nlibâd-tsò<sup>23</sup>

Used by (1\*): Zapotec<sup>23</sup>

Used for (1#): Neurological<sup>23</sup>

Cognates:

Language contact:

## ***Clematis* (Ranunculaceae)**

Spanish names: Barbas de chivo, pestaña de tecolote; Bejuco de barba viejo; Corraleña blanca

Indigenous names: Mākshi jäyā<sup>01</sup>; Tsay ¥wix, Kunki kuts¥wi<sup>03</sup>; Skaltzatzat momo, slarpitsitsit monksne<sup>05</sup>; Ithim wahuts, ithim yehtsel, ithim an maam, ithim an pulik, ithim an pulek taata<sup>07</sup>; Xmexmexib<sup>09</sup>; Ch'am pim<sup>14</sup>

Used by (6\*): Zoque<sup>01, 03</sup>; Totonac<sup>05</sup>; Huastec<sup>07</sup>; Yucatecan Maya<sup>09</sup>; Quichean Maya<sup>14</sup>

Used for (12#): Neurological<sup>07</sup>; Respiratory<sup>05, 07</sup>; Skin<sup>01, 03, 07, 09, 14</sup>; Pregnancy<sup>03</sup>; Female genital<sup>03</sup>; General and Unspecified<sup>03, 14</sup>

Cognates:

Language contact: Tot <> Hua

## ***Cleome* (Cleomaceae)**

Spanish names:

Indigenous names: Utsun ts'ohool<sup>07</sup>

Used by (2\*): Huastec<sup>07</sup>; Quichean Maya<sup>12</sup>

Used for (4#): Digestive<sup>12</sup>; Neurological<sup>07</sup>; Male genital<sup>12</sup>; General and Unspecified<sup>12</sup>

Cognates:

Language contact:

## ***Cleoserrata* (Capparaceae)**

Spanish names:

Indigenous names: Charamooya<sup>03</sup>; Huntal a puunchiix<sup>07</sup>

Used by (2\*): Zoque<sup>03</sup>; Huastec<sup>07</sup>

Used for (2#): Eye<sup>07</sup>; Skin<sup>03</sup>

Cognates:

Language contact:

### ***Clerodendrum* (Lamiaceae)**

Spanish names:

Indigenous names: Ts'een kwiniimte<sup>07</sup>

Used by (1\*): Huastec<sup>07</sup>

Used for (1#): Skin<sup>07</sup>

Cognates:

Language contact:

### ***Clethra* (Clethraceae)**

Spanish names:

Indigenous names: K'ajk'ete<sup>20</sup>

Used by (2\*): Zoque<sup>03</sup>; Western Maya<sup>20</sup>

Used for (3#): Digestive<sup>20</sup>; Skin<sup>03</sup>; Female genital<sup>03</sup>

Cognates:

Language contact:

### ***Clibadium* (Asteraceae)**

Spanish names:

Indigenous names: Tza'jil Che<sup>14</sup>

Used by (1\*): Quichean Maya<sup>14</sup>

Used for (2#): Respiratory<sup>14</sup>; Endocrine<sup>14</sup>

Cognates:

Language contact:

### ***Clidemia* (Melastomataceae)**

Spanish names: Tesuatillo de algodón

Indigenous names: Kaka rane<sup>01</sup>; Puki tesua<sup>03</sup>; Tsakam chikab ts'ohool, uxum ts'ohool, ehtiiil ts'amuts' uxkwe, ehtiiil puwaamte<sup>07</sup>; Xa bol q'een<sup>15</sup>; Ixq Q'een<sup>15</sup>; Ik pim<sup>17</sup>

Used by (5\*): Zoque<sup>01, 03</sup>; Huastec<sup>07</sup>; Quichean Maya<sup>15, 17</sup>

Used for (10#): Digestive<sup>03</sup>; Eye<sup>03</sup>; Cardiovascular<sup>07</sup>; Respiratory<sup>07</sup>; Skin<sup>03</sup>; Pregnancy<sup>15</sup>; Male genital<sup>15</sup>; General and Unspecified<sup>01</sup>; nd<sup>17</sup>

Cognates: Quich: i(x)k;

Language contact:

### ***Clinopodium* (Lamiaceae)**

Spanish names: Hierba de espanto; Matalzín; Matanci; Poleo; Tripa de rata/raton

Indigenous names: Jupi tane/tzämi tane/ jupi rane/ tzuk'u pu<sup>01</sup>; Piiquaa't tu 'huraa'n<sup>06</sup>; Ts'ots'on ts'ohool, ehtiiil tsakam wiichab<sup>07</sup>; Yäg-wäas, guizh-wäas<sup>23</sup>; Tonalxihuitl<sup>26</sup>

Used by (8\*): Zoque<sup>01</sup>; Totonac<sup>05, 06</sup>; Huastec<sup>07</sup>; Yucatecan Maya<sup>09</sup>; Zapotec<sup>22, 23</sup>; Nahua<sup>26</sup>

Used for (21#): Blood<sup>05</sup>; Digestive<sup>01, 07, 23</sup>; Eye<sup>01</sup>; Musculoskeletal<sup>26</sup>; Neurological<sup>01, 07, 09, 22</sup>; Psychological<sup>23, 26</sup>; Respiratory<sup>01, 22</sup>; Pregnancy<sup>07</sup>; General and Unspecified<sup>01, 05, 06, 07, 23, 26</sup>

Cognates:

Language contact:

### ***Clitoria* (Fabaceae)**

Spanish names:

Indigenous names: Jonwayi<sup>03</sup>

Used by (1\*): Zoque<sup>03</sup>

Used for (2#): Neurological<sup>03</sup>; Skin<sup>03</sup>

Cognates:

Language contact:

### ***Clusia* (Clusiaceae)**

Spanish names: Memela; Oreja de Cabro

Indigenous names: Upu kutkuy ay<sup>01</sup>; Ch'iy'ak<sup>12</sup>; Xk'ik' yuk' hubulo<sup>14</sup>

Used by (3\*): Zoque<sup>01</sup>; Quichean Maya<sup>12, 14</sup>

Used for (5#): Musculoskeletal<sup>12</sup>; Psychological<sup>12</sup>; Female genital<sup>01</sup>; General and Unspecified<sup>12, 14</sup>

Cognates: Quich: iyak/ikyuk;

Language contact:

### ***Cnidoscolus* (Euphorbiaceae)**

Spanish names: Chaya; Chaya de monte; Chaya que pica/mala mujer; Chayamansa; Chayo; Chichicastle; Ejaj; Hortiga, mala mujer; Mala mujer; Ortiga

Indigenous names: Ata tsäpe/ata/ kenuk tsäpe<sup>01</sup>; Tzis kä'wang<sup>02</sup>; Kenuk<sup>03</sup>; Gahni, cahh'ne, kgajna, xaca'nat<sup>05</sup>; Kajni<sup>06</sup>; Ak', ma'iy ak'<sup>07</sup>; Kh'ajni<sup>08</sup>; Chay<sup>09</sup>; Yop'ix'ek<sup>18</sup>; Geč bahd<sup>22</sup>; Yàg-làg<sup>23</sup>; Yàg-pcuà<sup>23</sup>

Used by (14\*): Zoque<sup>01, 02, 03</sup>; Totonac<sup>05, 06</sup>; Huastec<sup>07, 08</sup>; Yucatecan Maya<sup>09</sup>; Western Maya<sup>18</sup>; Zapotec<sup>22, 23</sup>; Nahua<sup>25, 26, 27</sup>

Used for (49#): Digestive<sup>03, 08</sup>; Eye<sup>05, 06</sup>; Musculoskeletal<sup>01, 05, 06, 09, 22</sup>; Neurological<sup>02, 03, 05, 06, 07</sup>; Respiratory<sup>03, 06</sup>; Skin<sup>01, 03, 05, 06, 07, 23</sup>; Endocrine<sup>01, 06, 18, 25, 27</sup>; Urological<sup>02, 03, 07, 26</sup>; Pregnancy<sup>01, 05, 07, 18</sup>; Female genital<sup>03, 05, 06, 07, 09</sup>; Male genital<sup>02</sup>; General and Unspecified<sup>06, 09, 27</sup>

Cognates: Zoq: kenuk; Tot: kajni;

Language contact: Zoq > Tot & Hua

### ***Coccocypselum* (Rubiaceae)**

Spanish names: Hoja de cobertón

Indigenous names: Tsujmi ay<sup>03</sup>

Used by (1\*): Zoque<sup>03</sup>

Used for (3#): Skin<sup>03</sup>; Female genital<sup>03</sup>; General and Unspecified<sup>03</sup>

Cognates:

Language contact:

### ***Coccoloba* (Polygonaceae)**

Spanish names: Carnero de coyote; Totopotzle, carnero negro/coyote, cinco negrito; Uva de mar; Uvero; Uvero de montaña

Indigenous names: Pakum<sup>03</sup>; J̄mniom pakum<sup>03</sup>; Bob<sup>09</sup>; Shuug nguio'o<sup>21</sup>; Bidxuyej' shuga'a, shuubguijooj<sup>21</sup>; Shuug<sup>21</sup>

Used by (3\*): Zoque<sup>03</sup>; Yucatecan Maya<sup>09</sup>; Zapotec<sup>21</sup>

Used for (20#): Digestive<sup>03, 21</sup>; Musculoskeletal<sup>21</sup>; Respiratory<sup>21</sup>; Skin<sup>03, 09, 21</sup>; Urological<sup>09</sup>; Female genital<sup>03, 21</sup>; General and Unspecified<sup>03, 21</sup>

Cognates:

Language contact:

### ***Cocculus* (Menispermaceae)**

Spanish names:

Indigenous names: Lek'ab t'iim, ichich ts'ohool, kw'itool ichich, lek'ab tiw, buk ichich<sup>07</sup>

Used by (1\*): Huastec<sup>07</sup>

Used for (2#): Digestive<sup>07</sup>; General and Unspecified<sup>07</sup>

Cognates:

Language contact:

### ***Cochlospermum* (Bixaceae)**

Spanish names: Coquito; Pochote; Pongolote; Tecomasuchi

Indigenous names: Putz kuy<sup>02</sup>; Puts cuy<sup>03</sup>; Nø mu'und<sup>04</sup>; Te'aj pochote<sup>18</sup>; T'uyuy, mujrur te<sup>19</sup>; Vapombu<sup>21</sup>

Used by (6\*): Zoque<sup>02, 03</sup>; Mixe<sup>04</sup>; Western Maya<sup>18, 19</sup>; Zapotec<sup>21</sup>

Used for (16#): Digestive<sup>02, 03, 04, 21</sup>; Neurological<sup>03</sup>; Skin<sup>02, 03, 18</sup>; Endocrine<sup>02, 03</sup>; Pregnancy<sup>19</sup>; Female genital<sup>02, 03, 21</sup>; General and Unspecified<sup>03, 21</sup>

Cognates: Zoq: puts kuy;

Language contact:

### **Cocos (Arecaceae)**

Spanish names: Coco

Indigenous names:

Used by (10\*): Zoque<sup>01, 02, 03</sup>; Mixe<sup>04</sup>; Yucatecan Maya<sup>09</sup>; Quichean Maya<sup>12</sup>; Western Maya<sup>18, 19</sup>; Zapotec<sup>21</sup>; Nahua<sup>28</sup>

Used for (22#): Digestive<sup>01, 02, 03, 04, 12, 18, 19, 21, 28</sup>; Neurological<sup>01</sup>; Psychological<sup>01, 02, 18</sup>; Endocrine<sup>18</sup>; Urological<sup>01, 12</sup>; Pregnancy<sup>09, 21</sup>; Female genital<sup>03, 12</sup>; Male genital<sup>12</sup>; General and Unspecified<sup>21</sup>

Cognates:

Language contact:

### **Codonanthe (Gesneriaceae)**

Spanish names:

Indigenous names: Saq'kar pim<sup>14</sup>

Used by (1\*): Quichean Maya<sup>14</sup>

Used for (2#): Respiratory<sup>14</sup>; General and Unspecified<sup>14</sup>

Cognates:

Language contact:

### **Coffea (Rubiaceae)**

Spanish names: Café

Indigenous names: Capel<sup>03</sup>; Kafey<sup>04</sup>; Capij<sup>06</sup>; Kapee<sup>07</sup>; Cape<sup>12</sup>; Guis gue<sup>21</sup>

Used by (13\*): Zoque<sup>01, 03</sup>; Mixe<sup>04</sup>; Totonac<sup>06</sup>; Huastec<sup>07</sup>; Yucatecan Maya<sup>09</sup>; Quichean Maya<sup>12, 13, 14</sup>; Western Maya<sup>18, 19</sup>; Zapotec<sup>21</sup>; Nahua<sup>26</sup>

Used for (36#): Digestive<sup>03, 06, 21, 26</sup>; Cardiovascular<sup>01</sup>; Musculoskeletal<sup>01, 06, 12</sup>; Neurological<sup>12, 13, 19</sup>; Psychological<sup>26</sup>; Respiratory<sup>01, 12, 19</sup>; Skin<sup>01, 04, 06, 07, 14, 21</sup>; Urological<sup>01, 06</sup>; Pregnancy<sup>01, 09, 12, 13, 21, 26</sup>; Female genital<sup>12</sup>; General and Unspecified<sup>03, 12, 13, 18, 19, 21</sup>

Cognates:

Language contact:

### **Cojoba (Fabaceae)**

Spanish names: Carabina de chango

Indigenous names: Uuts tuj cuy<sup>03</sup>; Xlokok' hi ha<sup>14</sup>

Used by (2\*): Zoque<sup>03</sup>; Quichean Maya<sup>14</sup>

Used for (4#): Digestive<sup>03</sup>; Skin<sup>03, 14</sup>; General and Unspecified<sup>14</sup>

Cognates:

Language contact:

### **Colocasía (Araceae)**

Spanish names: Malanga

Indigenous names:

Used by (2\*): Quichean Maya<sup>12</sup>; Zapotec<sup>21</sup>

Used for (2#): Endocrine<sup>12</sup>; General and Unspecified<sup>21</sup>

Cognates:

Language contact:

### **Colubrina (Rhamnaceae)**

Spanish names: Toatán

Indigenous names: Ehtiiil tsakam akich, itsaan an tsak look',<sup>07</sup>; Jauté<sup>18</sup>

Used by (2\*): Huastec<sup>07</sup>; Western Maya<sup>18</sup>

Used for (2#): Musculoskeletal<sup>07</sup>; General and Unspecified<sup>18</sup>

Cognates:

Language contact:

### ***Columnea* (Gesneriaceae)**

Spanish names: Jala

Indigenous names: Hui'huat<sup>06</sup>; Xoy Q'ehen, Kaq'i pim<sup>14</sup>; Kaki pim<sup>16</sup>; Kak'i pim<sup>17</sup>

Used by (4\*): Totonac<sup>06</sup>; Quichean Maya<sup>14, 16, 17</sup>

Used for (8#): Digestive<sup>06, 14</sup>; Eye<sup>14</sup>; Musculoskeletal<sup>06</sup>; Neurological<sup>14, 16</sup>; Respiratory<sup>14</sup>; nd<sup>17</sup>

Cognates: Quich: kaki pim;

Language contact:

### ***Combretum* (Combretaceae)**

Spanish names:

Indigenous names: Uouo tsay, Patan tsay<sup>03</sup>; Qa'xa'an caham<sup>16</sup>; Ka'an shan k'aham<sup>17</sup>

Used by (3\*): Zoque<sup>03</sup>; Quichean Maya<sup>16, 17</sup>

Used for (4#): Digestive<sup>03</sup>; Skin<sup>03</sup>; General and Unspecified<sup>16</sup>; nd<sup>17</sup>

Cognates:

Language contact:

### ***Commelina* (Commelinaceae)**

Spanish names: Caterita/hoja de azar/ siempreviva; Hierba de pollo; Madali; Matalín; Matalin verde; Uña de Gato, Tripa de Gallina

Indigenous names: Tzima jäyã/tzuy/ tza'a ay<sup>01</sup>; Po'otz ay/po'o tzeni<sup>02</sup>; Tsus uixpin<sup>03</sup>; Kasmalj<sup>05</sup>; Utek', mapk'ux ch'ohool<sup>07</sup>; U k'ak' ah ko'lebil, Ya'axha'xiw<sup>09</sup>; Karpar Coos<sup>12</sup>; Pitzijor<sup>13</sup>; Tz'i' Maaj Q'ehen<sup>14</sup>; Madali<sup>21</sup>

Used by (11\*): Zoque<sup>01, 02, 03</sup>; Totonac<sup>05</sup>; Huastec<sup>07</sup>; Yucatecan Maya<sup>09</sup>; Quichean Maya<sup>12, 13, 14</sup>; Zapotec<sup>21</sup>; Nahua<sup>28</sup>

Used for (29#): Digestive<sup>02, 07, 13, 28</sup>; Eye<sup>01, 02, 05, 07</sup>; Cardiovascular<sup>01, 14</sup>; Neurological<sup>01, 02</sup>; Skin<sup>01, 07, 09, 13, 21, 28</sup>; Endocrine<sup>14</sup>;

Urological<sup>07, 13</sup>; Female genital<sup>01, 07, 28</sup>; General and Unspecified<sup>01, 03, 07, 12</sup>

Cognates: Zoq: tsu;

Language contact:

### ***Comocladia* (Anacardiaceae)**

Spanish names: Hinchador, hinchahuevo

Indigenous names: Latz<sup>21</sup>

Used by (1\*): Zapotec<sup>21</sup>

Used for (1#): Skin<sup>21</sup>

Cognates:

Language contact:

### ***Conostegia* (Melastomataceae)**

Spanish names: Capulin niua; Moradito del cerro

Indigenous names: Jeepe<sup>03</sup>; Chuch jeepe<sup>03</sup>

Used by (2\*): Zoque<sup>03</sup>; Zapotec<sup>21</sup>

Used for (6#): Digestive<sup>03</sup>; Neurological<sup>03</sup>; Pregnancy<sup>03</sup>; Female genital<sup>03</sup>; General and Unspecified<sup>21</sup>

Cognates:

Language contact:

### ***Convolvulus* (Convolvulaceae)**

Spanish names: Flor de virgen chico

Indigenous names: Badooj buishii<sup>21</sup>

Used by (1\*): Zapotec<sup>21</sup>

Used for (1#): General and Unspecified<sup>21</sup>

Cognates:

Language contact:

### ***Conyza* (Asteraceae)**

Spanish names: Hoja de azar; Simonilla

Indigenous names: Tza'a tzoy<sup>01</sup>; Jok poy<sup>03</sup>; K'atab' Chaj<sup>14</sup>; Simòñ<sup>23</sup>

Used by (4\*): Zoque<sup>01, 03</sup>; Quichean Maya<sup>14</sup>; Zapotec<sup>23</sup>

Used for (9#): Digestive<sup>23</sup>; Cardiovascular<sup>23</sup>; Respiratory<sup>14</sup>; Skin<sup>03, 14</sup>; Urological<sup>03</sup>; Female genital<sup>03</sup>; General and Unspecified<sup>01, 14</sup>

Cognates:

Language contact:

### ***Corchorus* (Malvaceae)**

Spanish names: Malvavisco/ malva macho

Indigenous names: Ueji ay<sup>03</sup>; Pehtsul kw'eet, pehtsul thipon, thipon kweet, loliy thipon<sup>07</sup>

Used by (3\*): Zoque<sup>01, 03</sup>; Huastec<sup>07</sup>

Used for (10#): Digestive<sup>01, 07</sup>; Eye<sup>07</sup>; Neurological<sup>07</sup>; Psychological<sup>03</sup>; Skin<sup>07</sup>; Urological<sup>07</sup>; Pregnancy<sup>07</sup>; General and Unspecified<sup>01, 07</sup>

Cognates:

Language contact:

### ***Cordia* (Boraginaceae)**

Spanish names: Escobillo, mais grande; Gulabere; Gulaveri; Hoja de alacrán barraca; Solería; Vara negra; Xobarora

Indigenous names: Syunuk<sup>02</sup>; Kaku'e ay<sup>02</sup>; Y#k yom tsay<sup>03</sup>; Kiwa<sup>03</sup>; Wiixte<sup>07</sup>; Cirricote, Kop'te<sup>09</sup>; Jolob te<sup>20</sup>; Shubaruuba'a<sup>21</sup>; Gubenigw<sup>22</sup>

Used by (8\*): Zoque<sup>02, 03</sup>; Mixe<sup>04</sup>; Huastec<sup>07</sup>; Yucatecan Maya<sup>09</sup>; Western Maya<sup>20</sup>; Zapotec<sup>21, 22</sup>

Used for (21#): Digestive<sup>03, 20, 21, 22</sup>; Eye<sup>02, 07</sup>; Musculoskeletal<sup>21</sup>; Psychological<sup>03</sup>; Respiratory<sup>04, 09</sup>; Skin<sup>02, 03</sup>; Female genital<sup>02, 03, 04</sup>; General and Unspecified<sup>02, 04, 09, 21, 22</sup>

Cognates: CoreM: op'te;

Language contact:

### ***Cordyline* (Asparagaceae)**

Spanish names: Cola de gallo; Palmita

Indigenous names: Cuxtzi<sup>16</sup>

Used by (3\*): Zoque<sup>01, 02</sup>; Quichean Maya<sup>16</sup>

Used for (4#): Musculoskeletal<sup>01</sup>; Neurological<sup>16</sup>; Endocrine<sup>02</sup>; Female genital<sup>02</sup>

Cognates:

Language contact:

### ***Coreopsis* (Asteraceae)**

Spanish names:

Indigenous names: Bajk' al te<sup>20</sup>; Ncuàan-bzhiân, guièe ngùzhánc<sup>23</sup>

Used by (2\*): Western Maya<sup>20</sup>; Zapotec<sup>23</sup>

Used for (5#): Digestive<sup>20, 23</sup>; Psychological<sup>23</sup>; Endocrine<sup>23</sup>; General and Unspecified<sup>23</sup>

Cognates:

Language contact:

### ***Coriandrum* (Apiaceae)**

Spanish names: Cilandro; Cilantro; Culantro

Indigenous names: Cuulantu<sup>06</sup>; Kulaantu<sup>07</sup>; Culanto, uklanto<sup>13</sup>; Silândr<sup>23</sup>

Used by (10\*): Zoque<sup>01</sup>; Totonac<sup>06</sup>; Huastec<sup>07</sup>; Yucatecan Maya<sup>09</sup>; Quichean Maya<sup>12, 13, 14</sup>; Western Maya<sup>18, 19</sup>; Zapotec<sup>23</sup>

Used for (16#): Digestive<sup>06, 07, 09, 12, 13, 18, 19</sup>; Cardiovascular<sup>13</sup>; Musculoskeletal<sup>14</sup>; Psychological<sup>12</sup>; Respiratory<sup>14</sup>; Endocrine<sup>12, 13</sup>; Urological<sup>01</sup>; Pregnancy<sup>13, 23</sup>; General and Unspecified<sup>12</sup>

Cognates:

Language contact:

### ***Cornutia* (Lamiaceae)**

Spanish names: Carreto; Piojillo/pangajey; Tabaquillo

Indigenous names: M'yonh kuy/ monh'iun kuy<sup>01</sup>; Cana ay, Eexcuy<sup>03</sup>; Aškut kiwi<sup>05</sup>; Xolte'xnuk<sup>09</sup>; Loto'o che<sup>11</sup>; Sa'q Aatz'un<sup>14</sup>; Job lo te<sup>16</sup>; Yop'waúm<sup>18</sup>; Yax e vomol<sup>20</sup>

Used by (9\*): Zoque<sup>01, 03</sup>; Totonac<sup>05</sup>; Yucatecan Maya<sup>09, 11</sup>; Quichean Maya<sup>14, 16</sup>; Western Maya<sup>18, 20</sup>

Used for (17#): Digestive<sup>20</sup>; Musculoskeletal<sup>01, 03, 09, 11</sup>; Neurological<sup>16, 18</sup>; Respiratory<sup>09</sup>; Skin<sup>03, 14</sup>; Pregnancy<sup>01</sup>; General and Unspecified<sup>01, 03, 05, 09, 11, 18</sup>

Cognates: CoreM: lotV;

Language contact: Highland Popoluca <> Tot <> Yuc <> Kaqchikel

### ***Cortaderia* (Poaceae)**

Spanish names: Caña blanca

Indigenous names: Nida'a quitzii<sup>21</sup>

Used by (1\*): Zapotec<sup>21</sup>

Used for (2#): Respiratory<sup>21</sup>; General and Unspecified<sup>21</sup>

Cognates:

Language contact:

### ***Cosmos* (Asteraceae)**

Spanish names: Copalio

Indigenous names: Molajtu sotyi<sup>03</sup>

Used by (2\*): Zoque<sup>01, 03</sup>

Used for (3#): Digestive<sup>01</sup>; Skin<sup>03</sup>; General and Unspecified<sup>03</sup>

Cognates:

Language contact:

### ***Costus* (Costaceae)**

Spanish names: Caña agria; Caña de Cristo; Caña de Cristo ; Caña de cristo/caña agria/cañita; Caña de jabalí; Caña de venado; Caña de venado, caña de jabalí; Cañita; Cañuela

Indigenous names: Katzu aksa/baston katzu/katzu tane<sup>01</sup>; Katzu syitsi<sup>02</sup>; Chimpa tutu<sup>03</sup>; Chankat juki<sup>05</sup>; Cha'ncat juki, cha'ncat pa'xni<sup>06</sup>; Pakaab olom<sup>07</sup>; Tch'ama'jij<sup>12</sup>; Chu'un, Paguy t'e<sup>14</sup>; Chu'un<sup>14</sup>; Ch'uun te<sup>17</sup>; Oj paj<sup>18</sup>; Nidaii<sup>21</sup>; Cuapitzoatl<sup>25</sup>; Tepeohuate<sup>26</sup>

Used by (13\*): Zoque<sup>01, 02, 03</sup>; Totonac<sup>05, 06</sup>; Huastec<sup>07</sup>; Quichean Maya<sup>12, 14, 17</sup>; Western Maya<sup>18</sup>; Zapotec<sup>21</sup>; Nahua<sup>25, 26</sup>

Used for (42#): Blood<sup>12</sup>; Digestive<sup>01, 02, 03, 07, 12, 21, 26</sup>; Cardiovascular<sup>01</sup>; Musculoskeletal<sup>12</sup>; Skin<sup>07</sup>; Endocrine<sup>06, 12, 14</sup>; Urological<sup>01, 02, 03, 05, 06, 07, 14, 18, 21, 25, 26</sup>; Pregnancy<sup>14</sup>; Female genital<sup>03</sup>; Male genital<sup>14</sup>; Social problems<sup>14</sup>; General and Unspecified<sup>05, 07, 12, 14, 21, 25</sup>; nd<sup>17</sup>

Cognates: Zoq: katzu; Tot: chancat juki; Quich: chu'un;

Language contact:

### ***Couepia* (Chrysobalanaceae)**

Spanish names: Olozapote

Indigenous names: Pillum<sup>03</sup>

Used by (1\*): Zoque<sup>03</sup>

Used for (2#): Skin<sup>03</sup>; Female genital<sup>03</sup>

Cognates:

Language contact:

### ***Crassula* (Crassulaceae)**

Spanish names: Siempre viva

Indigenous names: Wiq bac, pix laq<sup>13</sup>

Used by (1\*): Quichean Maya<sup>13</sup>

Used for (5#): Digestive<sup>13</sup>; Eye<sup>13</sup>; Musculoskeletal<sup>13</sup>; Neurological<sup>13</sup>; Skin<sup>13</sup>

Cognates:

Language contact:

### ***Crataegus* (Rosaceae)**

Spanish names: Cardo; Manzanilla Arbol; Manzanita; Raíz de manzanita, tejocote

Indigenous names: Q'enum-che<sup>12</sup>; Ch'ix te', k'at'ix, k'achi'ix<sup>20</sup>; Yàg-mànzànit<sup>23</sup>

Used by (4\*): Zoque<sup>01</sup>; Quichean Maya<sup>12</sup>; Western Maya<sup>20</sup>; Zapotec<sup>23</sup>

Used for (15#): Blood<sup>12</sup>; Digestive<sup>12, 20</sup>; Musculoskeletal<sup>12, 23</sup>; Neurological<sup>12, 20</sup>; Respiratory<sup>01, 12, 20</sup>; Skin<sup>20</sup>; Urological<sup>23</sup>; Male genital<sup>12</sup>; General and Unspecified<sup>01, 12</sup>

Cognates:

Language contact:

### ***Crateva* (Capparaceae)**

Spanish names: Coscorrón

Indigenous names: Tsine te', ts'olob ok, thak'chook' buuru, thak'chook' uut', thi'te', ist'am te', thak'chook' teneklaab<sup>07</sup>; Bajpam<sup>18</sup>

Used by (2\*): Huastec<sup>07</sup>; Western Maya<sup>18</sup>

Used for (4#): Ear<sup>07</sup>; Musculoskeletal<sup>18</sup>; Neurological<sup>18</sup>; Skin<sup>07</sup>

Cognates:

Language contact:

### ***Crescentia* (Bignoniaceae)**

Spanish names: Jícara; Jícara, Morro; Morrito; Morro; Morro simarrón; Sycamorro/jícara

Indigenous names: Tzima<sup>01</sup>; Tzima<sup>02</sup>; Jeepe<sup>03</sup>; Patsim<sup>04</sup>; Thoot tima<sup>07</sup>; Ra taxy<sup>08</sup>; Luch<sup>09</sup>; Tzi Max<sup>12</sup>; Rix'hijom<sup>14</sup>; T'ub<sup>18</sup>; Tzimaj<sup>19</sup>; Buru boj<sup>21</sup>; Buru shiiga'a<sup>21</sup>; Yàg-zhig<sup>23</sup>

Used by (13\*): Zoque<sup>01, 02, 03</sup>; Mixe<sup>04</sup>; Huastec<sup>07, 08</sup>; Yucatecan Maya<sup>09</sup>; Quichean Maya<sup>12, 14</sup>; Western Maya<sup>18, 19</sup>; Zapotec<sup>21, 23</sup>

Used for (39#): Blood<sup>03</sup>; Digestive<sup>02, 04, 18</sup>; Ear<sup>03</sup>; Musculoskeletal<sup>02, 03, 07, 21</sup>; Neurological<sup>14, 18</sup>; Respiratory<sup>02, 03, 04, 08, 09, 12, 18, 19, 21</sup>; Skin<sup>02, 12, 21</sup>; Urological<sup>23</sup>; Pregnancy<sup>03, 04, 12</sup>; Male genital<sup>12</sup>; General and Unspecified<sup>01, 07, 12, 18, 21</sup>

Cognates: MZ: tsim; Zoq: tsima; Maya: tsima/tima; CoreM: tsima; Zap: zhig;

Language contact: MZ > Maya & Zap

### ***Crinum* (Amaryllidaceae)**

Spanish names: Lirio; Palenque, maguey blanco

Indigenous names: Xts'ulam<sup>09</sup>; Pets'kini, Pets'kinil<sup>09</sup>

Used by (3\*): Zoque<sup>01, 03</sup>; Yucatecan Maya<sup>09</sup>

Used for (8#): Digestive<sup>01</sup>; Neurological<sup>01, 09</sup>; Respiratory<sup>09</sup>; Skin<sup>03, 09</sup>; Endocrine<sup>03</sup>; General and Unspecified<sup>01</sup>

Cognates:

Language contact:

### ***Critonia* (Asteraceae)**

Spanish names: Canotillo; Hoja de Agua; Hoja de contra-viento, hoja de viento, choplé; Lengua de cierva; Lengua de vaca; San Nicolas; Vara negra

Indigenous names: Vaca totz<sup>01</sup>; Wakas yenkuy/ wakas tots ay/wakasy tots<sup>02</sup>; Cortia ay<sup>03</sup>; Poma cuy<sup>03</sup>; Tsuxky ajuk tyujt<sup>04</sup>; Pajk teky, payøwa'ats<sup>04</sup>; T'unu' holol<sup>07</sup>; Holol, alte may<sup>07</sup>; Tsamnek tok'te', animas ts'ohool<sup>07</sup>; Lok' ab' winq<sup>14</sup>; Yopo sác<sup>18</sup>; Guish lujtz yuss<sup>21</sup>

Used by (11\*): Zoque<sup>01, 02, 03</sup>; Mixe<sup>04</sup>; Totonac<sup>05</sup>; Huastec<sup>07</sup>; Quichean Maya<sup>12, 14</sup>; Western Maya<sup>18</sup>; Zapotec<sup>21</sup>; Nahua<sup>26</sup>

Used for (41#): Digestive<sup>02, 03, 07, 21</sup>; Musculoskeletal<sup>01, 02, 03, 04, 07, 18, 21</sup>; Neurological<sup>02, 03, 07</sup>; Respiratory<sup>07, 12, 14, 26</sup>; Skin<sup>03, 05, 07</sup>; Urological<sup>07</sup>; Pregnancy<sup>02, 03</sup>; Female genital<sup>02, 03, 04</sup>; General and Unspecified<sup>03, 04, 07, 18, 21</sup>

Cognates:

Language contact:

### ***Crossopetalum* (Celastraceae)**

Spanish names: Viperol negro

Indigenous names: Tzutzi tzaj kâki<sup>01</sup>; Ts'amuts' uxkwe', tsakam itsal koox, ts'amuts' uthu, tsatsa' ilaal<sup>07</sup>; Ra Mox<sup>15</sup>

Used by (4\*): Zoque<sup>01</sup>; Huastec<sup>07</sup>; Yucatecan Maya<sup>09</sup>; Quichean Maya<sup>15</sup>

Used for (9#): Digestive<sup>07, 09</sup>; Eye<sup>07</sup>; Musculoskeletal<sup>15</sup>; Psychological<sup>01</sup>; Skin<sup>07, 09</sup>; Female genital<sup>07</sup>; General and Unspecified<sup>15</sup>

Cognates:

Language contact:



### ***Crotalaria* (Fabaceae)**

Spanish names: Chepil; Chipile; Chipilín; Chipillín; Sonaje de muerto

Indigenous names: Tza' tzäpä/ tsaj tzäpä<sup>01</sup>; Txipiñ tsɣpɣ<sup>03</sup>; Tsuts tsɣpɣ<sup>03</sup>; Paxekuiny<sup>04</sup>; Mak'xuxut niy<sup>06</sup>; Thootil tsan, pok' thoot<sup>07</sup>; Much', B'uch<sup>12</sup>; Much<sup>12</sup>; Much<sup>13</sup>; Chepil<sup>21</sup>; Pxiizh, ncuàan-yè<sup>23</sup>

Used by (9\*): Zoque<sup>01, 03</sup>; Mixe<sup>04</sup>; Totonac<sup>06</sup>; Huastec<sup>07</sup>; Quichean Maya<sup>12, 13</sup>; Zapotec<sup>21, 23</sup>

Used for (27#): Blood<sup>01</sup>; Digestive<sup>01, 03, 12, 23</sup>; Cardiovascular<sup>01</sup>; Musculoskeletal<sup>12</sup>; Neurological<sup>12</sup>; Psychological<sup>103, 04, 06, 12, 13</sup>; Skin<sup>01, 03, 21, 23</sup>; Urological<sup>06</sup>; Pregnancy<sup>01</sup>; Female genital<sup>23</sup>; Male genital<sup>01</sup>; General and Unspecified<sup>01, 03, 07, 21, 23</sup>

Cognates: Zoq: tsaj/tsuts tsäpä; Quich: much;

Language contact: Chiapas Zoq <> Hua; Tot <> Quich

### ***Croton* (Euphorbiaceae)**

Spanish names: Agua dulce; Banquito; Cascarilla; Chiliue del monte; Contra; Contra cimarrón; Copachín; Copalchi; Copalchin; Hierba de Cancer Macho; Lloro sangre; Lloro sangre/palo de sangre; Mata pescado, hoja de mesquino; Pata de paloma; Quina, ventoside; Sangregado; Sangregrado

Indigenous names: Nhäpin kuy/ po'a nhäpin/ kun nhäpin / nhäpin pi'owa/ jäpya nhäpin<sup>01</sup>; Tin kuy/ponoj kuy<sup>01</sup>; Jäpya nhäpin<sup>01</sup>; Nä'wang niwi<sup>02</sup>; Nɣpiñi cuy<sup>03</sup>; Copa nɣpiñi cuy, Soj kobak, Soj muk<sup>03</sup>; Tam cuy<sup>03</sup>; Tapu ay<sup>03</sup>; Tuxoj tikts<sup>04</sup>; Pop tsaxoj<sup>04</sup>; Panii<sup>04</sup>; Pazlnankiwi, puklhni, puelnankiwi<sup>05</sup>; Puthwal<sup>07</sup>; Thak oliy<sup>07</sup>; Oliy<sup>07</sup>; Xoliiman<sup>07</sup>; Xiixte', xits' te<sup>07</sup>; Luk, ist ts'ohool<sup>07</sup>; Xebalam, Butsumukuy, Xikinch'omak<sup>09</sup>; Ik-aban<sup>09</sup>; Kokche<sup>09</sup>; Ek'balam, Xikm burro, Xikinch'omak<sup>09</sup>; Pets'k'uts<sup>09</sup>; Sakpokche', Ik-haab<sup>09</sup>; Iri skut<sup>10</sup>; Ru xup Top, Sa'l Q'os<sup>12</sup>; Copal chi<sup>17</sup>; Chi'ich' bot<sup>20</sup>; Yague riene<sup>21</sup>; Guaanashnash<sup>21</sup>; Guixaxunaashii<sup>21</sup>; Bläg-zhnâzh, guizh-bläg-zhnâzh, guizh-ngüdzii, guizh-ngüdz-mzhiè-dán<sup>23</sup>

Used by (15\*): Zoque<sup>01, 02, 03</sup>; Mixe<sup>04</sup>; Totonac<sup>05</sup>; Huastec<sup>07</sup>; Yucatecan Maya<sup>09, 10</sup>; Quichean Maya<sup>12, 13, 17</sup>; Western Maya<sup>20</sup>; Zapotec<sup>21, 23</sup>; Nahuatl<sup>26</sup>

Used for (94#): Blood<sup>10</sup>; Digestive<sup>01, 02, 03, 04, 07, 20, 21</sup>; Eye<sup>03, 07, 23</sup>; Musculoskeletal<sup>01, 03, 07</sup>; Neurological<sup>01, 03, 07, 12, 26</sup>; Respiratory<sup>02, 03, 05, 09, 12, 21</sup>; Skin<sup>01, 02, 03, 04, 05, 07, 09, 21, 23</sup>; Endocrine<sup>01, 12, 26</sup>; Urological<sup>01, 02, 03</sup>; Pregnancy<sup>02, 05, 13</sup>; Female genital<sup>02, 03, 07, 21</sup>; General and Unspecified<sup>01, 03, 05, 07, 09, 21, 23, 26</sup>; nd<sup>17</sup>

Cognates: MZ: soj; Zoq: näpin; Yuc: skuts; Zap: xnax;

Language contact:

### ***Crusea* (Rubiaceae)**

Spanish names:

Indigenous names: Uekx sotyi<sup>03</sup>

Used by (1\*): Zoque<sup>03</sup>

Used for (1#): Skin<sup>03</sup>

Cognates:

Language contact:

### ***Cryosophila* (Arecaceae)**

Spanish names: Escoba

Indigenous names:

Used by (1\*): Yucatecan Maya<sup>10</sup>

Used for (1#): Skin<sup>10</sup>

Cognates:

Language contact:

### ***Ctenitis* (Dryopteridaceae)**

Spanish names: Cola de Piedra

Indigenous names: Q'uq'i Pek<sup>14</sup>

Used by (1\*): Quichean Maya<sup>14</sup>

Used for (2#): General and Unspecified<sup>14</sup>

Cognates:

Language contact:

### ***Cucumis* (Cucurbitaceae)**

Spanish names: Melón; Pepino

Indigenous names:

Used by (4\*): Zoque<sup>01, 02</sup>; Quichean Maya<sup>12</sup>; Western Maya<sup>18</sup>

Used for (7#): Cardiovascular<sup>02</sup>; Musculoskeletal<sup>01</sup>; Skin<sup>18</sup>; Endocrine<sup>02</sup>; Urological<sup>02</sup>; General and Unspecified<sup>12</sup>

Cognates:

Language contact:

### ***Cucurbita* (Cucurbitaceae)**

Spanish names: Ayote; Calabaza; Calabaza amarga; Calabaza de castilla; Chilacayote

Indigenous names: (Yama joma/nak) pa'sun<sup>01</sup>; Pa'so/une/ukum<sup>02</sup>; Naspaasuñ<sup>03</sup>; Tsi'i<sup>04</sup>; Ni'pxi<sup>06</sup>; Maka ni'pxi<sup>06</sup>; Ka'ii<sup>06</sup>;

Ts'oop<sup>07</sup>; Qo'q<sup>13</sup>; Mukun<sup>13</sup>; Ratz'umi k'um<sup>14</sup>; Ch'um<sup>18</sup>; Ch'um<sup>19</sup>; Mayil<sup>20</sup>; Gueatu'u<sup>21</sup>; Guedu laac<sup>21</sup>; Giht<sup>22</sup>; Ayotli<sup>28</sup>

Used by (14\*): Zoque<sup>01, 02, 03</sup>; Mixe<sup>04</sup>; Totonac<sup>06</sup>; Huastec<sup>07</sup>; Quichean Maya<sup>13, 14</sup>; Western Maya<sup>18, 19, 20</sup>; Zapotec<sup>21, 22</sup>; Nahua<sup>28</sup>

Used for (32#): Blood<sup>13</sup>; Digestive<sup>01, 02, 03, 06, 14, 18, 19, 20, 21, 22, 28</sup>; Neurological<sup>02</sup>; Skin<sup>01, 03, 04, 18, 21, 28</sup>; Endocrine<sup>01, 18</sup>; Urological<sup>06, 21</sup>;

Pregnancy<sup>13, 18</sup>; Male genital<sup>21</sup>; General and Unspecified<sup>07, 19, 21</sup>

Cognates: Zoq: pasun; CoreM: k'um / ch'um;

Language contact: Quich > Chimalapa Zoq

### ***Cuminum* (Apiaceae)**

Spanish names: Comino

Indigenous names:

Used by (6\*): Zoque<sup>01, 02</sup>; Totonac<sup>06</sup>; Quichean Maya<sup>12, 13</sup>; Zapotec<sup>21</sup>

Used for (10#): Digestive<sup>01, 12, 21</sup>; Neurological<sup>06, 12</sup>; Respiratory<sup>06, 21</sup>; Pregnancy<sup>02, 13</sup>; General and Unspecified<sup>13</sup>

Cognates:

Language contact:

### ***Cunila* (Lamiaceae)**

Spanish names: Menta silvestre

Indigenous names: Cruz Q'os<sup>12</sup>

Used by (1\*): Quichean Maya<sup>12</sup>

Used for (4#): Digestive<sup>12</sup>; Psychological<sup>12</sup>; Skin<sup>12</sup>; General and Unspecified<sup>12</sup>

Cognates:

Language contact:

### ***Cupania* (Sapindaceae)**

Spanish names: Quebracho

Indigenous names: Akpak<sup>03</sup>

Used by (2\*): Zoque<sup>03</sup>; Totonac<sup>05</sup>

Used for (4#): Digestive<sup>03</sup>; Skin<sup>03</sup>; Female genital<sup>03</sup>; General and Unspecified<sup>05</sup>

Cognates:

Language contact:

### ***Cuphea* (Lythraceae)**

Spanish names: Comida de colibri; Elotillo/malvarisco morado; Escoba del rio/ de agua; Hierba de venado; Mirto; Rosalito, kufeo, coralía; Sanguinaria

Indigenous names: Mojko matsyi/ mojkuy mätyzik<sup>01</sup>; N¥ang s¥gay<sup>03</sup>; Arooz ts'ohool<sup>07</sup>; Uwa' tzi'kin, uwa'tzunum, m'ax<sup>13</sup>;

Mesb'eel li ha', Xmes hi ha, Mes'uul ha'<sup>14</sup>; Q'anruhil Q'ehen<sup>14</sup>

Used by (6\*): Zoque<sup>01, 03</sup>; Huastec<sup>07</sup>; Quichean Maya<sup>13, 14</sup>; Nahua<sup>26</sup>

Used for (25#): Blood<sup>01, 14</sup>; Digestive<sup>01, 13, 14, 26</sup>; Cardiovascular<sup>01</sup>; Musculoskeletal<sup>01</sup>; Neurological<sup>01, 03</sup>; Psychological<sup>14</sup>;

Respiratory<sup>01, 14</sup>; Skin<sup>01, 03, 07, 26</sup>; Female genital<sup>26</sup>; General and Unspecified<sup>03, 07, 13, 14</sup>

Cognates:

Language contact:

### ***Cupressus* (Cupressaceae)**

Spanish names: Ciprés

Indigenous names: K'isis<sup>12</sup>; K'sis<sup>13</sup>; Xnaq' Cipres<sup>14</sup>

Used by (4\*): Zoque<sup>01</sup>; Quichean Maya<sup>12, 13, 14</sup>

Used for (16#): Cardiovascular<sup>12</sup>; Musculoskeletal<sup>01, 12, 13</sup>; Neurological<sup>12, 13, 14</sup>; Respiratory<sup>12, 13</sup>; Skin<sup>01, 13</sup>; Urological<sup>01</sup>; Pregnancy<sup>12</sup>; Female genital<sup>12</sup>; General and Unspecified<sup>01, 12</sup>

Cognates: Quich: kisis;

Language contact:

### ***Curatella* (Dilleniaceae)**

Spanish names: Lengua de vaca; Tachicón

Indigenous names: Wakas yenkuy<sup>02</sup>; Potcuy<sup>03</sup>; Xø popt lijar<sup>04</sup>; Balaga lujtza yussu<sup>21</sup>

Used by (4\*): Zoque<sup>02, 03</sup>; Mixe<sup>04</sup>; Zapotec<sup>21</sup>

Used for (8#): Digestive<sup>03</sup>; Musculoskeletal<sup>02, 04</sup>; Skin<sup>03, 04</sup>; Female genital<sup>03</sup>; General and Unspecified<sup>04, 21</sup>

Cognates:

Language contact:

### ***Curcuma* (Zingiberaceae)**

Spanish names: Curcuma

Indigenous names: Azafrán<sup>07</sup>

Used by (3\*): Zoque<sup>01</sup>; Huastec<sup>07</sup>; Quichean Maya<sup>12</sup>

Used for (6#): Digestive<sup>01, 12</sup>; Musculoskeletal<sup>07</sup>; Psychological<sup>12</sup>; Respiratory<sup>07</sup>; Skin<sup>12</sup>

Cognates:

Language contact:

### ***Cuscuta* (Convolvulaceae)**

Spanish names: Barba del Diablo; Cardenillo, cuernas del diablo; Fideos, cordoncillo; Sopa de fideo, cardenillo; Tripa de gallina; Zacapal

Indigenous names: Tza'a tane/ pu'utze<sup>01</sup>; Puutx tsay<sup>03</sup>; Snuku<sup>05</sup>; Fideo ts'ohool, man ch'aah<sup>07</sup>; Q'en Sumachi' Aq'om<sup>12</sup>; Zacapactle<sup>26</sup>

Used by (8\*): Zoque<sup>01, 03</sup>; Totonac<sup>05</sup>; Huastec<sup>07</sup>; Quichean Maya<sup>12, 13</sup>; Nahua<sup>25, 26</sup>

Used for (16#): Blood<sup>05</sup>; Digestive<sup>03, 05</sup>; Neurological<sup>07</sup>; Skin<sup>07, 13, 26</sup>; Endocrine<sup>25</sup>; Urological<sup>03, 12, 25</sup>; General and Unspecified<sup>01, 03, 07, 12</sup>

Cognates: Zoq: puts/putx;

Language contact:

### ***Cyathea* (Cyatheaceae)**

Spanish names: Cola de caballo; Colandrillo, cola de chango; Palo de culebra; Palo de vibora/mano de leon/cola de mono/helecho macho

Indigenous names: Kan nak'e /tzawi tutz/ tzimui<sup>01</sup>; Kinä näpin/suyi suki pung<sup>02</sup>; Shgola miigu'u<sup>21</sup>

Used by (3\*): Zoque<sup>01, 02</sup>; Zapotec<sup>21</sup>

Used for (12#): Digestive<sup>01, 02, 21</sup>; Eye<sup>02</sup>; Cardiovascular<sup>02</sup>; Endocrine<sup>01, 02</sup>; Urological<sup>01, 02</sup>; General and Unspecified<sup>01, 02</sup>

Cognates:

Language contact:

### ***Cyclanthera* (Cucurbitaceae)**

Spanish names:

Indigenous names: Chunak Q'en<sup>14</sup>

Used by (1\*): Quichean Maya<sup>14</sup>

Used for (1#): Skin<sup>14</sup>

Cognates:

Language contact:

### ***Cyclosporum* (Apiaceae)**

Spanish names:

Indigenous names: Kulantoil an t'ot<sup>07</sup>

Used by (2\*): Huastec<sup>07</sup>; Western Maya<sup>20</sup>

Used for (2#): Digestive<sup>20</sup>; Respiratory<sup>07</sup>

Cognates:

Language contact:

### ***Cydonia* (Rosaceae)**

Spanish names: Membrillo

Indigenous names: Yàg-mèmbri<sup>23</sup>

Used by (3\*): Quichean Maya<sup>12, 13</sup>; Zapotec<sup>23</sup>

Used for (8#): Digestive<sup>13, 23</sup>; Cardiovascular<sup>12</sup>; Musculoskeletal<sup>12</sup>; Neurological<sup>12</sup>; Skin<sup>12</sup>; Urological<sup>12</sup>; General and Unspecified<sup>12</sup>

Cognates:

Language contact:

### ***Cymbopetalum* (Annonaceae)**

Spanish names: Oreja de gato; Orifela

Indigenous names: Yagamishu'u<sup>21</sup>

Used by (3\*): Zoque<sup>01, 02</sup>; Zapotec<sup>21</sup>

Used for (9#): Digestive<sup>02</sup>; Ear<sup>02</sup>; Musculoskeletal<sup>21</sup>; Neurological<sup>02, 21</sup>; Psychological<sup>01</sup>; Respiratory<sup>02, 21</sup>; Female genital<sup>02</sup>

Cognates:

Language contact:

### ***Cymbopogon* (Poaceae)**

Spanish names: Té de Limón; Te de limón, zacate limón; Té limón; Telimon; Telimon, zacate limón; Telimón/ te de zacate; Zacate de limon; Zacate limón

Indigenous names: Paja'k wājpaik ay<sup>02</sup>; Limunmuk<sup>03</sup>; Limoon toom<sup>07</sup>; Q'is Q'im<sup>14</sup>; Bänälä limón<sup>18</sup>; Sansiwre wamal<sup>20</sup>; Te guisa<sup>21</sup>

Used by (18\*): Zoque<sup>01, 02, 03</sup>; Mixe<sup>04</sup>; Totonac<sup>05, 06</sup>; Huastec<sup>07</sup>; Yucatecan Maya<sup>09, 10, 11</sup>; Quichean Maya<sup>12, 13, 14</sup>; Western Maya<sup>18, 19, 20</sup>; Zapotec<sup>21</sup>; Nahua<sup>25</sup>

Used for (52#): Blood<sup>12</sup>; Digestive<sup>01, 03, 04, 05, 07, 09, 12, 18, 20, 21</sup>; Cardiovascular<sup>02, 05, 12, 13, 14</sup>; Musculoskeletal<sup>13, 18</sup>; Neurological<sup>01, 13</sup>; Psychological<sup>01, 02, 12, 18, 21</sup>; Respiratory<sup>01, 02, 03, 09, 11, 12, 13, 18, 19, 25</sup>; Endocrine<sup>02, 12</sup>; Urological<sup>02, 07</sup>; Pregnancy<sup>06, 13, 18</sup>; Female genital<sup>01, 12, 13</sup>; General and Unspecified<sup>01, 10, 11, 12, 13, 18, 21</sup>

Cognates:

Language contact:

### ***Cyperus* (Cyperaceae)**

Spanish names: Chantulli; Chintul; Cintule; Cituli; Grama; Grama Silvestre; Piomía; Zacate

Indigenous names: Pioninu, Puutx uixpin<sup>03</sup>; Haluk'laab ts'ohool, tsakam tsaw, tathim toom<sup>07</sup>; Tupux<sup>09</sup>; Sabana Aq'om<sup>12</sup>; K'im<sup>13</sup>; Poopil Q'ehen<sup>14</sup>; Tzajal yisim be<sup>20</sup>; Shapandú<sup>21</sup>

Used by (11\*): Zoque<sup>02, 03</sup>; Mixe<sup>04</sup>; Huastec<sup>07</sup>; Yucatecan Maya<sup>09</sup>; Quichean Maya<sup>12, 13, 14</sup>; Western Maya<sup>20</sup>; Zapotec<sup>21</sup>; Nahua<sup>27</sup>

Used for (27#): Blood<sup>12</sup>; Digestive<sup>07, 12, 20, 27</sup>; Musculoskeletal<sup>21</sup>; Neurological<sup>04, 12, 21</sup>; Psychological<sup>03</sup>; Respiratory<sup>02, 04, 09</sup>; Skin<sup>02, 04, 07, 21</sup>; Urological<sup>07, 12</sup>; Pregnancy<sup>13, 21</sup>; General and Unspecified<sup>07, 14, 21, 27</sup>

Cognates:

Language contact: Highland Popolucá <> Yuc

### ***Cyrtocarpa* (Anacardiaceae)**

Spanish names: Chupandilla; Ciruelo

Indigenous names: K'inim te<sup>08</sup>

Used by (2\*): Huastec<sup>08</sup>; Nahua<sup>27</sup>

Used for (5#): Digestive<sup>08</sup>; Neurological<sup>08</sup>; Skin<sup>08</sup>; Urological<sup>27</sup>; General and Unspecified<sup>08</sup>

Cognates:

Language contact:

### ***Cyrtocymura* (Asteraceae)**

Spanish names: Tzilit

Indigenous names: Tsisykuy<sup>01</sup>

Used by (1\*): Zoque<sup>01</sup>

Used for (2#): Neurological<sup>01</sup>; Respiratory<sup>01</sup>

Cognates:

Language contact:

### ***Dahlia* (Asteraceae)**

Spanish names: Santa Catarina; Tunay

Indigenous names: Tney, tunay, oi<sup>13</sup>; Ch'olip, cho'liv, ch'olov<sup>20</sup>

Used by (3\*): Quichean Maya<sup>12, 13</sup>; Western Maya<sup>20</sup>

Used for (18#): Digestive<sup>12, 13, 20</sup>; Eye<sup>13</sup>; Ear<sup>13, 20</sup>; Cardiovascular<sup>12</sup>; Neurological<sup>13, 20</sup>; Psychological<sup>13</sup>; Respiratory<sup>20</sup>; Skin<sup>12, 13</sup>; Urological<sup>12, 13</sup>; General and Unspecified<sup>12, 13, 20</sup>

Cognates: CoreM: o(l)i;

Language contact:

### ***Dalbergia* (Fabaceae)**

Spanish names: Guayacan

Indigenous names:

Used by (1\*): Zapotec<sup>21</sup>

Used for (3#): Musculoskeletal<sup>21</sup>; Female genital<sup>21</sup>; General and Unspecified<sup>21</sup>

Cognates:

Language contact:

### ***Dalea* (Fabaceae)**

Spanish names: Quebrapiedra; Toronjil

Indigenous names: Tsun tsun<sup>03</sup>; Tsakam chilab<sup>07</sup>; Azúfre xiw, Suyk'ak<sup>09</sup>; Nlít-quiè, guìzh-nlít-quiè<sup>23</sup>

Used by (5\*): Zoque<sup>01, 03</sup>; Huastec<sup>07</sup>; Yucatecan Maya<sup>09</sup>; Zapotec<sup>23</sup>

Used for (11#): Blood<sup>07</sup>; Digestive<sup>03, 23</sup>; Ear<sup>07</sup>; Musculoskeletal<sup>07</sup>; Skin<sup>09</sup>; Urological<sup>01</sup>; Pregnancy<sup>03</sup>; General and Unspecified<sup>03, 07</sup>

Cognates:

Language contact:

### ***Dalechampia* (Euphorbiaceae)**

Spanish names:

Indigenous names: Kw'aat', la'ix iits', tithelom ch'ohool<sup>07</sup>

Used by (1\*): Huastec<sup>07</sup>

Used for (1#): Neurological<sup>07</sup>

Cognates:

Language contact:

### ***Danaea* (Marattiaceae)**

Spanish names:

Indigenous names:

Used by (1\*): Quichean Maya<sup>17</sup>

Used for (1#): nd<sup>17</sup>

Cognates:

Language contact:

### ***Datura* (Solanaceae)**

Spanish names: Chanico; Contra brujo; Toloache; Toloache blanco; Toloache morado; Toloache, reina de la noche; Toloache/ hierba del diablo

Indigenous names: Matunu<sup>03</sup>; Campana pøh<sup>04</sup>; San pedro ujts<sup>04</sup>; Thanab<sup>07</sup>; Chaniko, Chamisa<sup>09</sup>; Buuruj'hui moradu<sup>21</sup>; Mbuuruj'hui<sup>21</sup>; Blåg-rzûdz, guizh-rzûdz<sup>23</sup>

Used by (11\*): Zoque<sup>01, 02, 03</sup>; Mixe<sup>04</sup>; Huastec<sup>07</sup>; Yucatecan Maya<sup>09, 10</sup>; Quichean Maya<sup>13</sup>; Western Maya<sup>18</sup>; Zapotec<sup>21, 23</sup>

Used for (35#): Digestive<sup>02, 03, 13, 18, 21</sup>; Eye<sup>02</sup>; Cardiovascular<sup>18</sup>; Musculoskeletal<sup>02, 04, 21, 23</sup>; Neurological<sup>13</sup>; Psychological<sup>13, 21</sup>; Skin<sup>01, 02, 04, 07, 09, 21, 23</sup>; Female genital<sup>02, 03, 07, 21</sup>; General and Unspecified<sup>03, 04, 07, 10, 21, 23</sup>

Cognates: Zap: ruj;

Language contact:

### ***Daucus* (Apiaceae)**

Spanish names: Zanahoria

Indigenous names:

Used by (3\*): Zoque<sup>01, 02</sup>; Quichean Maya<sup>12</sup>

Used for (8#): Digestive<sup>01, 12</sup>; Eye<sup>12</sup>; Musculoskeletal<sup>12</sup>; Psychological<sup>12</sup>; Skin<sup>12</sup>; Urological<sup>02</sup>; General and Unspecified<sup>02</sup>

Cognates:

Language contact:

### ***Davilla* (Dilleniaceae)**

Spanish names:

Indigenous names: Potcuy tsay<sup>03</sup>; Kak'i k'aham<sup>17</sup>

Used by (2\*): Zoque<sup>03</sup>; Quichean Maya<sup>17</sup>

Used for (2#): Digestive<sup>03</sup>; nd<sup>17</sup>

Cognates:

Language contact:

### ***Decachaeta* (Asteraceae)**

Spanish names: Tabacco cimarrón

Indigenous names: Cimarrón tsʷui<sup>03</sup>

Used by (1\*): Zoque<sup>03</sup>

Used for (2#): Urological<sup>03</sup>; Female genital<sup>03</sup>

Cognates:

Language contact:

### ***Decatropis* (Rutaceae)**

Spanish names:

Indigenous names: Bichaam te<sup>07</sup>

Used by (1\*): Huastec<sup>07</sup>

Used for (3#): Digestive<sup>07</sup>; Musculoskeletal<sup>07</sup>; General and Unspecified<sup>07</sup>

Cognates:

Language contact:

### ***Dendropanax* (Araliaceae)**

Spanish names: Palo de agua

Indigenous names: Un cuy<sup>03</sup>; Multe<sup>07</sup>; Cojl<sup>17</sup>

Used by (3\*): Zoque<sup>03</sup>; Huastec<sup>07</sup>; Quichean Maya<sup>17</sup>

Used for (13#): Eye<sup>03</sup>; Ear<sup>03</sup>; Musculoskeletal<sup>07</sup>; Neurological<sup>03, 07</sup>; Psychological<sup>03, 07</sup>; Respiratory<sup>07</sup>; Skin<sup>03, 07</sup>; General and Unspecified<sup>03, 07</sup>; nd<sup>17</sup>

Cognates:

Language contact:

### ***Deppea* (Rubiaceae)**

Spanish names:

Indigenous names:

Used by (1\*): Zoque<sup>03</sup>

Used for (1#): General and Unspecified<sup>03</sup>

Cognates:

Language contact:

### ***Desmanthus* (Fabaceae)**

Spanish names: Guajillo

Indigenous names: Salat-ik', Sibik'xiw, Sib-ik", Sik'ink'ax<sup>09</sup>; Lya las<sup>22</sup>

Used by (2\*): Yucatecan Maya<sup>09</sup>; Zapotec<sup>22</sup>

Used for (2#): Digestive<sup>22</sup>; Eye<sup>09</sup>

Cognates:

Language contact:

### ***Desmodium* (Fabaceae)**

Spanish names: Cadillo rojo; Pegapega

Indigenous names: Tʔ pitx nang tsang<sup>03</sup>; Ujts jayi pekpa<sup>04</sup>; T'apay thekw'eel, xutsun t'eel, bokoolil an t'eel, bakanil t'eel, anuch kw'a<sup>107</sup>; Ts'at' ts'ohool, t'apay thekw'eel<sup>07</sup>; Pak'umpak<sup>09</sup>; Chim pim<sup>14</sup>; Ch'in pim<sup>17</sup>

Used by (7\*): Zoque<sup>02, 03</sup>; Mixe<sup>04</sup>; Huastec<sup>07</sup>; Yucatecan Maya<sup>09</sup>; Quichean Maya<sup>14, 17</sup>

Used for (15#): Digestive<sup>03, 07</sup>; Musculoskeletal<sup>14</sup>; Skin<sup>02, 03, 07, 09</sup>; Urological<sup>02, 04</sup>; Pregnancy<sup>02, 03, 14</sup>; General and Unspecified<sup>14</sup>; nd<sup>17</sup>

Cognates:

Language contact: Highland Popoluca <> Hua; Mixe <> Yuc

### ***Dialium* (Fabaceae)**

Spanish names:

Indigenous names: Tʔm paki<sup>03</sup>

Used by (1\*): Zoque<sup>03</sup>

Used for (3#): Digestive<sup>03</sup>; Pregnancy<sup>03</sup>; General and Unspecified<sup>03</sup>

Cognates:

Language contact:

### ***Dichondra* (Convolvulaceae)**

Spanish names:

Indigenous names: Ahuaxmama<sup>26</sup>

Used by (1\*): Nahua<sup>26</sup>

Used for (1#): Skin<sup>26</sup>

Cognates:

Language contact:

### ***Dichorisandra* (Commelinaceae)**

Spanish names:

Indigenous names: Tzima'j pim<sup>17</sup>

Used by (1\*): Quichean Maya<sup>17</sup>

Used for (1#): nd<sup>17</sup>

Cognates:

Language contact:

### ***Dicliptera* (Acanthaceae)**

Spanish names:

Indigenous names: Uxkwe' ts'ohool, wits paya<sup>07</sup>; Tza' Tzalun Mi' Ha<sup>14</sup>

Used by (2\*): Huastec<sup>07</sup>; Quichean Maya<sup>14</sup>

Used for (3#): Female genital<sup>07</sup>; General and Unspecified<sup>07, 14</sup>

Cognates:

Language contact:

### ***Dictyanthus* (Apocynaceae)**

Spanish names:

Indigenous names: Ensul, Emsul<sup>09</sup>

Used by (1\*): Yucatecan Maya<sup>09</sup>

Used for (1#): General and Unspecified<sup>09</sup>

Cognates:

Language contact:

### ***Dictyoxiphium* (Tectariaceae)**

Spanish names:

Indigenous names: Usi xul k'ejen<sup>17</sup>

Used by (1\*): Quichean Maya<sup>17</sup>

Used for (1#): nd<sup>17</sup>

Cognates:

Language contact:

### ***Didymaea* (Rubiaceae)**

Spanish names: Pegapega

Indigenous names: Ajak Ruk'amal Ibo'ch Aq'om<sup>12</sup>

Used by (1\*): Quichean Maya<sup>12</sup>

Used for (4#): Digestive<sup>12</sup>; Cardiovascular<sup>12</sup>; Musculoskeletal<sup>12</sup>; Neurological<sup>12</sup>

Cognates:

Language contact:

### ***Digitalis* (Plantaginaceae)**

Spanish names: Digital

Indigenous names:

Used by (1\*): Quichean Maya<sup>12</sup>

Used for (3#): Cardiovascular<sup>12</sup>; Musculoskeletal<sup>12</sup>; Endocrine<sup>12</sup>

Cognates:

Language contact:

### ***Dioscorea* (Dioscoreaceae)**

Spanish names: Barbasco; Barbasco Amarillo; Barbasco, calabacilla; Cocolmeca; Cuculmeca; Ñame; Tumba vaquero

Indigenous names: Tumi tätz<sup>01</sup>; Puutx naaku<sup>03</sup>; Manat<sup>05</sup>; Laab ith<sup>07</sup>; Panil book, ix thuyum<sup>07</sup>; Cancer-ak', Wil-ak<sup>09</sup>; Xchup

ichim qotz<sup>15</sup>; P'ujk<sup>20</sup>; Ganabigujchii<sup>21</sup>

Used by (13\*): Zoque<sup>01, 02, 03</sup>; Mixe<sup>04</sup>; Totonac<sup>05</sup>; Huastec<sup>07</sup>; Yucatecan Maya<sup>09</sup>; Quichean Maya<sup>15</sup>; Western Maya<sup>18, 19, 20</sup>;

Zapotec<sup>21</sup>; Nahua<sup>26</sup>

Used for (25#): Blood<sup>15</sup>; Digestive<sup>20, 26</sup>; Cardiovascular<sup>01</sup>; Musculoskeletal<sup>01, 03, 04, 05, 21</sup>; Psychological<sup>07</sup>; Skin<sup>02, 09</sup>; Urological<sup>01</sup>;

Pregnancy<sup>07, 19, 26</sup>; Female genital<sup>19, 21, 26</sup>; Male genital<sup>01</sup>; General and Unspecified<sup>02, 18, 21</sup>

Cognates:

Language contact:



### ***Diospyros* (Ebenaceae)**

Spanish names: Tachona; Zapote negro

Indigenous names: Nuu<sup>03</sup>; Sawat<sup>05</sup>; Suaa<sup>06</sup>; Munek<sup>07</sup>; Xkakalche<sup>09</sup>; Sibil<sup>09</sup>; Ndxuuli<sup>21</sup>; Bila'huaj<sup>21</sup>

Used by (6\*): Zoque<sup>03</sup>; Totonac<sup>05, 06</sup>; Huastec<sup>07</sup>; Yucatecan Maya<sup>09</sup>; Zapotec<sup>21</sup>

Used for (14#): Digestive<sup>05, 06</sup>; Eye<sup>06</sup>; Respiratory<sup>06</sup>; Skin<sup>03, 09, 21</sup>; Female genital<sup>03</sup>; General and Unspecified<sup>03, 06, 07, 21</sup>

Cognates: Tot: sawat/suaa'l;

Language contact:

### ***Diphysa* (Fabaceae)**

Spanish names: Chipilcoite; Chipile; Guachipillin; Ruda cimarron; Ruda de monte

Indigenous names: Tzus kuy<sup>01</sup>; Tsus cuy<sup>03</sup>; Tsuxp<sup>04</sup>; Chichath, K'anaw te, tsitsab te<sup>07</sup>; Susup, Ts'us'uk<sup>09</sup>; Ču Čuk<sup>10</sup>; Ikuy<sup>12</sup>; Chipilin Aq'om, Uku'<sup>12</sup>

Used by (8\*): Zoque<sup>01, 03</sup>; Mixe<sup>04</sup>; Huastec<sup>07</sup>; Yucatecan Maya<sup>09, 10</sup>; Quichean Maya<sup>12</sup>; Zapotec<sup>21</sup>

Used for (34#): Blood<sup>07</sup>; Digestive<sup>01, 03, 07, 09</sup>; Ear<sup>01</sup>; Cardiovascular<sup>12</sup>; Musculoskeletal<sup>12, 21</sup>; Neurological<sup>01, 07, 12</sup>;

Psychological<sup>12</sup>; Respiratory<sup>01</sup>; Skin<sup>01, 03, 04, 07, 09</sup>; Endocrine<sup>12</sup>; Urological<sup>01, 07</sup>; Pregnancy<sup>07</sup>; Social problems<sup>01</sup>; General and Unspecified<sup>01, 03, 07, 10, 12, 21</sup>

Cognates: MZ: tsus/tsux; Zoq: tsuskuy; Yuc: ts'us'uk/tzutzuk;

Language contact: MZ > Yuc

### ***Disciphania* (Menispermaceae)**

Spanish names: Bejuco real, Istamoreal

Indigenous names:

Used by (1\*): Western Maya<sup>18</sup>

Used for (1#): Digestive<sup>18</sup>

Cognates:

Language contact:

### ***Discocnide* (Urticaceae)**

Spanish names: Ortiga mayor

Indigenous names: Menuk/ kenuk<sup>01</sup>; Balagadena, lagui<sup>21</sup>

Used by (2\*): Zoque<sup>01</sup>; Zapotec<sup>21</sup>

Used for (3#): Musculoskeletal<sup>01, 21</sup>; Respiratory<sup>21</sup>

Cognates:

Language contact:

### ***Disocactus* (Cactaceae)**

Spanish names:

Indigenous names: Brün-yäl-guièts, yàg-bdzi-lbæ, yàg-bdzi-làs<sup>23</sup>

Used by (1\*): Zapotec<sup>23</sup>

Used for (1#): General and Unspecified<sup>23</sup>

Cognates:

Language contact:

### ***Dodonaea* (Sapindaceae)**

Spanish names: Jaras; Jarilla; Pimientillo

Indigenous names: Yahg žij<sup>22</sup>; Yàg-blàg-bîdz<sup>23</sup>

Used by (3\*): Zoque<sup>01</sup>; Zapotec<sup>22, 23</sup>

Used for (8#): Digestive<sup>23</sup>; Ear<sup>23</sup>; Musculoskeletal<sup>22, 23</sup>; Pregnancy<sup>01</sup>; General and Unspecified<sup>01, 22, 23</sup>

Cognates:

Language contact:

### ***Dolichandra* (Bignoniaceae)**

Spanish names: Murciélago/bejuco de chinaco

Indigenous names: Täsi<sup>01</sup>; Oohoox ts'aah. Itsik' ocho', kuxkum ts'aah<sup>07</sup>

Used by (2\*): Zoque<sup>01</sup>; Huastec<sup>07</sup>

Used for (3#): Cardiovascular<sup>01</sup>; Musculoskeletal<sup>01</sup>; Psychological<sup>07</sup>

Cognates:

Language contact:

### ***Doliocarpus* (Dilleniaceae)**

Spanish names:

Indigenous names: Sun tsay<sup>03</sup>; Xø popt aats<sup>04</sup>

Used by (2\*): Zoque<sup>03</sup>; Mixe<sup>04</sup>

Used for (5#): Digestive<sup>03</sup>; Musculoskeletal<sup>04</sup>; Skin<sup>04</sup>; Female genital<sup>03</sup>; General and Unspecified<sup>04</sup>

Cognates:

Language contact:

### ***Dorstenia* (Moraceae)**

Spanish names: Contra hierba; Contrayerba; Cresta de gallo; Cresto de gallo; Hoja de sapo/mano de sapo/hoja de mizquino; Mal de Sapo

Indigenous names: Tzutz kin<sup>01</sup>; Tapu ay<sup>02</sup>; Nak ay<sup>03</sup>; K'ubak kw'a', itsal kw'a'<sup>07</sup>; Xkambalhaw<sup>09</sup>; K'opopo'il Q'eheh<sup>14</sup>; Xtulihom' K'opopo, K'urux Ixox<sup>14</sup>; Ch'up i ai<sup>17</sup>; Amtz'ak<sup>19</sup>; Yanayu'u<sup>21</sup>

Used by (11\*): Zoque<sup>01, 02, 03</sup>; Huastec<sup>07</sup>; Yucatecan Maya<sup>09, 11</sup>; Quichean Maya<sup>14, 17</sup>; Western Maya<sup>18, 19</sup>; Zapotec<sup>21</sup>

Used for (25#): Digestive<sup>07, 09, 11, 19, 21</sup>; Ear<sup>03</sup>; Musculoskeletal<sup>03, 07, 21</sup>; Neurological<sup>07</sup>; Skin<sup>01, 02, 03, 14, 18</sup>; Urological<sup>03</sup>;

Pregnancy<sup>07, 09</sup>; Female genital<sup>03</sup>; General and Unspecified<sup>07, 14, 21</sup>; nd<sup>17</sup>

Cognates:

Language contact:

### ***Drimys* (Winteraceae)**

Spanish names:

Indigenous names: Canela y cuyo<sup>09</sup>

Used by (1\*): Yucatecan Maya<sup>09</sup>

Used for (1#): Digestive<sup>09</sup>

Cognates:

Language contact:

### ***Duranta* (Verbenaceae)**

Spanish names:

Indigenous names: K'anpokolche<sup>09</sup>

Used by (1\*): Yucatecan Maya<sup>09</sup>

Used for (1#): Skin<sup>09</sup>

Cognates:

Language contact:

### ***Dysphania* (Amaranthaceae)**

Spanish names: Apasote; Apazote de comida; Epasote; Epazote

Indigenous names: Onyuk/Tzig tuna/ unyuk<sup>01</sup>; Kisawa/kisyawa<sup>02</sup>; Epazut<sup>03</sup>; Podeey<sup>04</sup>; Sa'kalkha'jna<sup>05</sup>; Sa 'kha 'kalx 'na<sup>06</sup>; Tihtsan<sup>07</sup>; Tijson<sup>08</sup>; Lukumxiw<sup>09</sup>; Sik'ij<sup>12</sup>; Sik'aj<sup>13</sup>; Cha'jen binilaj<sup>18</sup>; Pasujt<sup>19</sup>; Kakan, koko'on, kokon', kaka'an, kajk'an<sup>20</sup>;

Biajta<sup>21</sup>; Bitia<sup>22</sup>; Ptiè<sup>23</sup>; Epazote<sup>25</sup>; Epazotl<sup>28</sup>

Used by (23\*): Zoque<sup>01, 02, 03</sup>; Mixe<sup>04</sup>; Totonac<sup>05, 06</sup>; Huastec<sup>07, 08</sup>; Yucatecan Maya<sup>09, 10, 11</sup>; Quichean Maya<sup>12, 13, 14</sup>; Western Maya<sup>18, 19, 20</sup>; Zapotec<sup>21, 22, 23</sup>; Nahua<sup>25, 26, 28</sup>

Used for (62#): Digestive<sup>01, 02, 03, 04, 05, 06, 07, 08, 09, 10, 11, 12, 13, 14, 18, 19, 20, 21, 23, 25, 26, 28</sup>; Eye<sup>21</sup>; Cardiovascular<sup>12</sup>; Musculoskeletal<sup>01, 08</sup>; Neurological<sup>02, 03, 12</sup>; Psychological<sup>13, 22</sup>; Respiratory<sup>02, 05, 12, 21, 28</sup>; Skin<sup>01, 07, 11, 12, 13, 18, 19, 20, 21, 25</sup>; Urological<sup>02</sup>; Pregnancy<sup>05, 06, 07, 12, 13, 19</sup>; Female genital<sup>05, 12, 14, 19</sup>; General and Unspecified<sup>01, 05, 08, 12, 21</sup>

Cognates: Tot: sa'khalka'xna; Hua: ti'sVn; CoreM: k'aj; Quich: sik'Vj; Zap: bi'tia; Nah: epazotl;

Language contact: Tot > CoreM; Quich > Chiapas Zoq; Zap > Tabasco Chontal

### ***Dyssodia* (Asteraceae)**

Spanish names: Flor de angelina

Indigenous names: Guibgui parloshaan<sup>21</sup>; Gi togol kwa'č<sup>22</sup>

Used by (2\*): Zapotec<sup>21, 22</sup>

Used for (4#): Digestive<sup>21</sup>; Psychological<sup>22</sup>; Skin<sup>22</sup>; General and Unspecified<sup>21</sup>

Cognates:

Language contact:

### ***Echeandia* (Asparagaceae)**

Spanish names:

Indigenous names: Eem ts'ohool, eem ilaal, eemil koy, thakpen thel, <sup>07</sup>

Used by (1\*): Huastec<sup>07</sup>

Used for (4#): Digestive<sup>07</sup>; Neurological<sup>07</sup>; Skin<sup>07</sup>; Pregnancy<sup>07</sup>

Cognates:

Language contact:

### ***Echeveria* (Crassulaceae)**

Spanish names: Siempre viva

Indigenous names: Guièe-yùzh<sup>23</sup>

Used by (2\*): Zapotec<sup>23</sup>; Nahua<sup>26</sup>

Used for (2#): Skin<sup>23, 26</sup>

Cognates:

Language contact:

### ***Echinopepon* (Cucurbitaceae)**

Spanish names: Hoja San pedro

Indigenous names: Tzuyo awit <sup>01</sup>; Yopo San Pedro<sup>18</sup>

Used by (2\*): Zoque<sup>01</sup>; Western Maya<sup>18</sup>

Used for (2#): Neurological<sup>18</sup>; Urological<sup>01</sup>

Cognates:

Language contact:

### ***Echites* (Apocynaceae)**

Spanish names:

Indigenous names: Tsank'ub ts'aah, thuuchum ts'ohool, , thuchuum ichiich, lek'ab choc', milim ch'ohool, ch'aahil otso<sup>07</sup>;

Sak-viperol<sup>09</sup>

Used by (2\*): Huastec<sup>07</sup>; Yucatecan Maya<sup>09</sup>

Used for (4#): Digestive<sup>07</sup>; Respiratory<sup>07</sup>; Skin<sup>07, 09</sup>

Cognates:

Language contact:

### ***Echium* (Boraginaceae)**

Spanish names: hierba azul

Indigenous names: Tijtson ts'ojól<sup>08</sup>

Used by (1\*): Huastec<sup>08</sup>

Used for (4#): Blood<sup>08</sup>; Musculoskeletal<sup>08</sup>; Skin<sup>08</sup>; General and Unspecified<sup>08</sup>

Cognates:

Language contact:

### ***Ehretia* (Boraginaceae)**

Spanish names: Lambimbo; Roble

Indigenous names: Thathub<sup>07</sup>; T'iiw te<sup>107</sup>; Beeb, Xi'mche<sup>109</sup>

Used by (3\*): Huastec<sup>07</sup>; Yucatecan Maya<sup>09</sup>; Zapotec<sup>21</sup>

Used for (12#): Digestive<sup>07, 21</sup>; Cardiovascular<sup>21</sup>; Respiratory<sup>09</sup>; Skin<sup>07, 21</sup>; Pregnancy<sup>07</sup>; Female genital<sup>07</sup>; General and Unspecified<sup>107, 09, 21</sup>

Cognates:

Language contact:

### ***Eichhornia* (Pontederiaceae)**

Spanish names: Riñoncillo

Indigenous names:

Used by (1\*): Zapotec<sup>21</sup>

Used for (2#): Digestive<sup>21</sup>; General and Unspecified<sup>21</sup>

Cognates:

Language contact:

### ***Elaphoglossum* (Dryopteridaceae)**

Spanish names: Hierba Dura

Indigenous names: Achi'y Q'os Aqom<sup>12</sup>; Rubelsa i xul<sup>17</sup>; Culantro pim<sup>17</sup>; Lùdz-mdzin, guizh-lùdz-mdzin<sup>23</sup>

Used by (4\*): Zoque<sup>03</sup>; Quichean Maya<sup>12, 17</sup>; Zapotec<sup>23</sup>

Used for (9#): Digestive<sup>03, 12, 23</sup>; Endocrine<sup>12</sup>; Urological<sup>12</sup>; Male genital<sup>12</sup>; General and Unspecified<sup>12</sup>; nd<sup>17</sup>

Cognates:

Language contact:

### ***Eleocharis* (Cyperaceae)**

Spanish names: Cintul; Cola de borrego

Indigenous names: Pap/tza'a tzoy<sup>01</sup>; Boo'wat toom<sup>07</sup>

Used by (3\*): Zoque<sup>01</sup>; Huastec<sup>07</sup>; Nahua<sup>26</sup>

Used for (3#): Urological<sup>26</sup>; General and Unspecified<sup>01, 07</sup>

Cognates:

Language contact:

### ***Elephantopus* (Asteraceae)**

Spanish names: Tahuane sonjehuite

Indigenous names:

Used by (1\*): Totonac<sup>05</sup>

Used for (1#): Skin<sup>05</sup>

Cognates:

Language contact:

### ***Eleutherine* (Iridaceae)**

Spanish names:

Indigenous names: Tsakam apats', chak apach<sup>107</sup>

Used by (1\*): Huastec<sup>07</sup>

Used for (1#): Digestive<sup>07</sup>

Cognates:

Language contact:

### ***Elytraria* (Acanthaceae)**

Spanish names: Un pie

Indigenous names: Was'an tzitz<sup>01</sup>; Xutsum bat'aw<sup>07</sup>; Kabalxa'an, Kambaxa'an<sup>09</sup>

Used by (3\*): Zoque<sup>01</sup>; Huastec<sup>07</sup>; Yucatecan Maya<sup>09</sup>

Used for (4#): Digestive<sup>09</sup>; Ear<sup>07</sup>; Skin<sup>01</sup>; Female genital<sup>09</sup>

Cognates: Maya: baCa;

Language contact: Yuc > Chiapas Zoq

### ***Encyclia* (Orchidaceae)**

Spanish names:

Indigenous names: Xkananikte<sup>09</sup>

Used by (1\*): Yucatecan Maya<sup>09</sup>

Used for (1#): Skin<sup>09</sup>

Cognates:

Language contact:

### ***Entada* (Fabaceae)**

Spanish names: Dinero de judas, dinero del judío

Indigenous names:

Used by (1\*): Totonac<sup>05</sup>

Used for (3#): Digestive<sup>05</sup>; Musculoskeletal<sup>05</sup>; Skin<sup>05</sup>

Cognates:

Language contact:

### ***Enterolobium* (Fabaceae)**

Spanish names: Guanacastilla; Guanacastle; Nacastle

Indigenous names: Tzang kuy<sup>01</sup>; Jipi<sup>03</sup>; Xøxy kepky<sup>04</sup>; Tiyow<sup>07</sup>; Pich<sup>09</sup>; Biguisha<sup>21</sup>

Used by (6\*): Zoque<sup>01, 03</sup>; Mixe<sup>04</sup>; Huastec<sup>07</sup>; Yucatecan Maya<sup>09</sup>; Zapotec<sup>21</sup>

Used for (10#): Digestive<sup>01, 03, 09</sup>; Respiratory<sup>01, 07</sup>; Skin<sup>04, 21</sup>; General and Unspecified<sup>09, 21</sup>

Cognates:

Language contact:

### ***Epaltes* (Asteraceae)**

Spanish names: Hierba de sapo, gurusapo; Manzanilla de tres lomos; Tabaquillo, sabañon

Indigenous names: Putax ay<sup>03</sup>; Piix<sup>04</sup>; Kúz ix much<sup>18</sup>; Badxuumij<sup>21</sup>

Used by (5\*): Zoque<sup>02, 03</sup>; Mixe<sup>04</sup>; Western Maya<sup>18</sup>; Zapotec<sup>21</sup>

Used for (18#): Digestive<sup>03</sup>; Musculoskeletal<sup>03, 18</sup>; Neurological<sup>04, 18</sup>; Respiratory<sup>02, 18</sup>; Skin<sup>03, 18, 21</sup>; Pregnancy<sup>21</sup>; Female genital<sup>02, 03, 21</sup>; General and Unspecified<sup>03, 04, 18, 21</sup>

Cognates:

Language contact:

### ***Epidendrum* (Orchidaceae)**

Spanish names:

Indigenous names: Tsooy pathum<sup>07</sup>

Used by (1\*): Huastec<sup>07</sup>

Used for (2#): Neurological<sup>07</sup>; General and Unspecified<sup>07</sup>

Cognates:

Language contact:

### ***Epilobium* (Onagraceae)**

Spanish names: Clavo del monte

Indigenous names: Guish claab<sup>21</sup>

Used by (1\*): Zapotec<sup>21</sup>

Used for (3#): Respiratory<sup>21</sup>; Skin<sup>21</sup>; Female genital<sup>21</sup>

Cognates:

Language contact:

### ***Epiphyllum* (Cactaceae)**

Spanish names: Pitaya

Indigenous names: Nuchchi<sup>03</sup>; Ti'qol' bak<sup>14</sup>; Chik'ba'l b'ak<sup>17</sup>

Used by (3\*): Zoque<sup>03</sup>; Quichean Maya<sup>14, 17</sup>

Used for (6#): Digestive<sup>03</sup>; Musculoskeletal<sup>14</sup>; Skin<sup>03</sup>; Pregnancy<sup>03</sup>; Female genital<sup>03</sup>; nd<sup>17</sup>

Cognates: Quich: ik bak;

Language contact:

### ***Equisetum* (Equisetaceae)**

Spanish names: Cola da Caballo; Cola de caballo; Cola de caballo, boldo; Cola de caballo/cola de macho; Cola de iguana/ de caballo

Indigenous names: Cayo tuty/sus tokdong/tu tane/caballo tutz muk<sup>01</sup>; Tzoy muk<sup>02</sup>; Ruje'y kej, Xpumay Aq'om<sup>12</sup>; Uje' kies, uje kej, tu aj, wiquab' q'ayes, rismachi koj, xul aj, tum<sup>13</sup>; Xye' Kawaay<sup>14</sup>; U nej chj<sup>19</sup>; Yok' es chan<sup>20</sup>; Shcool cavaij<sup>21</sup>; X-pàan ngùtsièts, x-côl-càbâll, guizh-zhig<sup>23</sup>

Used by (14\*): Zoque<sup>01, 02, 03</sup>; Quichean Maya<sup>12, 13, 14</sup>; Western Maya<sup>19, 20</sup>; Zapotec<sup>21, 23</sup>; Nahua<sup>25, 26, 27, 28</sup>

Used for (43#): Blood<sup>12, 21</sup>; Digestive<sup>01, 02, 12, 20, 21</sup>; Cardiovascular<sup>01</sup>; Musculoskeletal<sup>01, 13, 23</sup>; Neurological<sup>12</sup>; Psychological<sup>13, 21</sup>; Skin<sup>12, 13, 14, 28</sup>; Endocrine<sup>01, 25</sup>; Urological<sup>01, 02, 12, 13, 19, 21, 23, 25, 26, 27, 28</sup>; Pregnancy<sup>02, 03</sup>; Female genital<sup>01, 12, 13</sup>; Male genital<sup>01, 12</sup>;

General and Unspecified<sup>12, 13, 14, 21, 28</sup>

Cognates: Zoq: muk; Quich: uje kej;

Language contact: Quich <> Chortí

### ***Erechtites* (Asteraceae)**

Spanish names:

Indigenous names: Malil koy, tsakam xobo' ts'ohool, akw'aalil koy<sup>07</sup>

Used by (1\*): Huastec<sup>07</sup>

Used for (1#): General and Unspecified<sup>07</sup>

Cognates:

Language contact:

### ***Eremosis* (Asteraceae)**

Spanish names: Suquinay; Suquinay, Sal Andrews

Indigenous names: Suquinay<sup>14</sup>; Bakil vomol<sup>20</sup>

Used by (3\*): Quichean Maya<sup>12, 14</sup>; Western Maya<sup>20</sup>

Used for (6#): Digestive<sup>12, 20</sup>; Cardiovascular<sup>12</sup>; Respiratory<sup>14</sup>; Endocrine<sup>12</sup>; General and Unspecified<sup>14</sup>

Cognates:

Language contact:

### ***Erigeron* (Asteraceae)**

Spanish names: Hierba del burro; Margarita silvestre

Indigenous names: Ts'ojolil an churi<sup>08</sup>; Sal b'ey, kotz'ij b'ey<sup>12</sup>; Tepemalin, tepemanzanilla<sup>26</sup>

Used by (4\*): Zoque<sup>01</sup>; Huastec<sup>08</sup>; Quichean Maya<sup>12</sup>; Nahua<sup>26</sup>

Used for (13#): Digestive<sup>01, 08, 26</sup>; Musculoskeletal<sup>08</sup>; Neurological<sup>01, 08</sup>; Respiratory<sup>08, 12</sup>; Skin<sup>01, 08, 12</sup>; Urological<sup>08</sup>; General and Unspecified<sup>12</sup>

Cognates:

Language contact:

### ***Eriobotrya* (Rosaceae)**

Spanish names: Mispero; Nispero

Indigenous names: Yàg-nîspèrò<sup>23</sup>

Used by (6\*): Zoque<sup>01</sup>; Totonac<sup>06</sup>; Quichean Maya<sup>12, 13</sup>; Zapotec<sup>23</sup>; Nahua<sup>25</sup>

Used for (21#): Digestive<sup>01, 06, 12, 13, 23</sup>; Cardiovascular<sup>06</sup>; Musculoskeletal<sup>01, 06</sup>; Respiratory<sup>12, 25</sup>; Endocrine<sup>01, 12</sup>; Urological<sup>01, 06, 12, 13, 25</sup>; Female genital<sup>12, 13</sup>; Male genital<sup>01</sup>; General and Unspecified<sup>12</sup>

Cognates:

Language contact:

### ***Eriosema* (Fabaceae)**

Spanish names:

Indigenous names: Poja sotyi<sup>03</sup>

Used by (1\*): Zoque<sup>03</sup>

Used for (6#): Digestive<sup>03</sup>; Psychological<sup>03</sup>; Skin<sup>03</sup>; Urological<sup>03</sup>; Pregnancy<sup>03</sup>

Cognates:

Language contact:

### ***Eryngium* (Apiaceae)**

Spanish names: Cardo de Bosque; Cilandro ancho, culandro cimarron, culandro de monte, culandro indio, silentro de perro, espina de coche, espinabodoc, escorsoner; Cilandro cimarron; Cilandro de castill, vanero; Cilantro cimarron; Corte Santo; Culantro cimarrón; Espina blanca, escorsonera; Perejil; Perenjil, Cilantro cimarrón; Piñuela

Indigenous names: Culando<sup>01</sup>; Ehtiil i laab kulaantu<sup>07</sup>; Tsakam bathuch<sup>07</sup>; Q'ix juyu<sup>12</sup>; Kortosanto Kix Aq'om<sup>12</sup>; Sak' k'ix<sup>13</sup>;

Samat, uklanto tzé', to' k'ix<sup>13</sup>; Samat<sup>17</sup>; Yujtz' ner via'r<sup>19</sup>; Guièts-mél-lò, guìzh-guièts<sup>23</sup>

Used by (13\*): Zoque<sup>01, 03</sup>; Mixe<sup>04</sup>; Huastec<sup>07</sup>; Quichean Maya<sup>12, 13, 17</sup>; Western Maya<sup>18, 19</sup>; Zapotec<sup>21, 23</sup>; Nahua<sup>25, 26</sup>

Used for (51#): Digestive<sup>01, 03, 04, 13, 18, 19, 23</sup>; Ear<sup>03, 13</sup>; Cardiovascular<sup>12, 18</sup>; Musculoskeletal<sup>12, 13, 21</sup>; Neurological<sup>01, 13, 26</sup>;

Psychological<sup>18</sup>; Respiratory<sup>03, 07, 18, 21</sup>; Skin<sup>01, 12, 13, 18, 26</sup>; Endocrine<sup>01, 25</sup>; Urological<sup>13, 23, 25</sup>; Pregnancy<sup>01, 03, 18</sup>; Female genital<sup>12, 13, 18</sup>; Male genital<sup>03, 12, 18</sup>; General and Unspecified<sup>01, 12, 21, 26</sup>; nd<sup>17</sup>

Cognates: Quich: k'ix;

Language contact:

### ***Erythrina* (Fabaceae)**

Spanish names: Colorín, gasparo; Colorin, zempantle; Cosquelite, Colorín; Gasparo; Hierbaboracha; Madrecacao/ Flor de pita/madre; Palo cuchillo; Palo de Pito; Palo pito; Pito; Tzozantli

Indigenous names: Tzentzen<sup>01</sup>; Monhg ay tzäpä<sup>02</sup>; Tzentzen<sup>02</sup>; Copa tsen tsen<sup>03</sup>; Nʼtung tsen tsen<sup>03</sup>; Oxexy<sup>04</sup>; Lagatin<sup>05</sup>; Ihahlni<sup>06</sup>; Hutukuu', pemoch, pemuuts<sup>07</sup>; Tsamnek hutukuu<sup>07</sup>; Chakmolonche<sup>09</sup>; Tzité<sup>12</sup>; Mzi té<sup>13</sup>; Tzité<sup>14</sup>; Mo'te<sup>19</sup>; Guixa'a mindu'u<sup>21</sup>; Ekimite<sup>26</sup>; Tzompantl<sup>28</sup>

Used by (16\*): Zoque<sup>01, 02, 03</sup>; Mixe<sup>04</sup>; Totonac<sup>05, 06</sup>; Huastec<sup>07</sup>; Yucatecan Maya<sup>09, 10</sup>; Quichean Maya<sup>12, 13, 14</sup>; Western Maya<sup>19</sup>; Zapotec<sup>21</sup>; Nahua<sup>26, 28</sup>

Used for (58#): Blood<sup>12</sup>; Digestive<sup>01, 02, 03, 12, 14, 26, 28</sup>; Eye<sup>02, 09</sup>; Cardiovascular<sup>14</sup>; Musculoskeletal<sup>12, 14</sup>; Neurological<sup>07, 12, 13, 19, 21</sup>; Psychological<sup>02, 07, 12, 14, 19, 21</sup>; Respiratory<sup>04, 07, 09, 12</sup>; Skin<sup>02, 03, 06, 12, 14</sup>; Urological<sup>01, 02, 09</sup>; Pregnancy<sup>03, 07, 19</sup>; Female genital<sup>03, 12, 14, 19</sup>; General and Unspecified<sup>03, 05, 06, 07, 10, 12, 19, 21</sup>

Cognates: Zoq: tzentzen; Quich: tzite;

Language contact: Zoq > Quich

### ***Erythroxylum* (Erythroxylaceae)**

Spanish names:

Indigenous names: Xik'iche<sup>09</sup>

Used by (1\*): Yucatecan Maya<sup>09</sup>

Used for (1#): Skin<sup>09</sup>

Cognates:

Language contact:

### ***Esenbeckia* (Rutaceae)**

Spanish names:

Indigenous names: Lanaax te<sup>07</sup>

Used by (1\*): Huastec<sup>07</sup>

Used for (2#): Digestive<sup>07</sup>; Neurological<sup>07</sup>

Cognates:

Language contact:

### ***Espejoa* (Asteraceae)**

Spanish names: Maragrita del monte

Indigenous names:

Used by (1\*): Zapotec<sup>21</sup>

Used for (1#): Skin<sup>21</sup>

Cognates:

Language contact:

### ***Eucalyptus* (Myrtaceae)**

Spanish names: Alcanfor; Eucalipto; Eucalito; Eucalyptus; Euclipto; Eukalypto; Hoja de alcanfor

Indigenous names: Ts'uj<sup>08</sup>; Ukal, awoliy che', ok'al che'<sup>13</sup>; Gusha'a alcanfor, ventulatu<sup>21</sup>; Yàg-eùcàlìpt<sup>23</sup>

Used by (17\*): Zoque<sup>01, 02, 03</sup>; Mixe<sup>04</sup>; Huastec<sup>08</sup>; Yucatecan Maya<sup>09</sup>; Quichean Maya<sup>12, 13, 14</sup>; Western Maya<sup>18, 19</sup>; Zapotec<sup>21, 22, 23</sup>; Nahua<sup>25, 26, 27</sup>

Used for (42#): Digestive<sup>12, 21, 23</sup>; Musculoskeletal<sup>02, 12, 13, 21, 26</sup>; Neurological<sup>08, 13</sup>; Psychological<sup>12</sup>; Respiratory<sup>01, 02, 03, 04, 08, 09, 12, 13, 14, 18, 19, 21, 22, 23, 25, 26, 27</sup>; Skin<sup>12</sup>; Endocrine<sup>03, 18</sup>; Pregnancy<sup>21</sup>; Female genital<sup>02, 03</sup>; General and Unspecified<sup>03, 08, 12, 18, 21</sup>

Cognates:

Language contact:

### ***Eugenia* (Myrtaceae)**

Spanish names: Capulín; Cinco negrito; Escobilla

Indigenous names: Petcuy<sup>03</sup>; Axtaam pikx<sup>04</sup>; Islakastápu tamak, aka'lasni<sup>05</sup>; Pehte', chuk ba'im<sup>07</sup>; Ha' pehte', chuk ba'im, wal puchun<sup>07</sup>; Xhilnich', Sakloobche<sup>09</sup>; Chaknii<sup>09</sup>; Lamush pim<sup>17</sup>; Yanaj<sup>21</sup>

Used by (7\*): Zoque<sup>03</sup>; Mixe<sup>04</sup>; Totonac<sup>05</sup>; Huastec<sup>07</sup>; Yucatecan Maya<sup>09</sup>; Quichean Maya<sup>17</sup>; Zapotec<sup>21</sup>

Used for (20#): Digestive<sup>03, 04, 05, 07, 21</sup>; Eye<sup>09</sup>; Respiratory<sup>07, 21</sup>; Skin<sup>03, 07, 09, 21</sup>; Endocrine<sup>07</sup>; Urological<sup>07</sup>; Pregnancy<sup>21</sup>; Female genital<sup>03</sup>; General and Unspecified<sup>21</sup>; nd<sup>17</sup>

Cognates:

Language contact: Highland Popoluca <> Hua; Mixe <> Tot

### ***Eupatorium* (Asteraceae)**

Spanish names: Hierba buenilla; Hierba de zopilote; Prodigiosa amarilla

Indigenous names: Š haàç<sup>10</sup>; Ratz'un Q'ehen<sup>14</sup>

Used by (4\*): Yucatecan Maya<sup>10</sup>; Quichean Maya<sup>14</sup>; Zapotec<sup>21</sup>; Nahua<sup>26</sup>

Used for (8#): Digestive<sup>21, 26</sup>; Eye<sup>14</sup>; Musculoskeletal<sup>10</sup>; Neurological<sup>10</sup>; Skin<sup>10, 26</sup>; General and Unspecified<sup>10</sup>

Cognates:

Language contact:



## ***Euphorbia* (Euphorbiaceae)**

Spanish names: Añadir hueso; Flor de noche buena; Fraile; Golondrina, china; Golondrina; Golondrina, riñonia; Golondrina/hoja de azar; Gordobahn; Hierba de la araña; Hierba de la araña chica; Hierba de la golondrina; Hierba de paño/hierba de antojo/hoja de azar; Hierba del gusano/ de la araña; Hierba Mala; Hoja de azar; Leche de Cabro, Quineo; Lecheria; Lechillo; Mayorga; Noche buena, flor de pascua; Nochebuena; Pie de niño; Quebra muelas/ amarra hueso; Sueda consueda/mayorga/ hoja de elda; Tamaulipas; Zacate rojo

Indigenous names: Tza'a tzoj<sup>01</sup>; Pak son kuy<sup>01</sup>; Paipai<sup>03</sup>; Mꞥa xuxcuy<sup>03</sup>; Petx kukmuk<sup>03</sup>; Majk tekøøk tso<sup>04</sup>; Atxapts<sup>04</sup>; Hab ichiich, leetsa ts'ohool, puunchiix wits, alwa' akal ch'ohool, i'ixte, ch'awil ch'ohool<sup>07</sup>; Leetsa ts'ohool<sup>07</sup>; Xaa' uts'aal, tsakam nuk'ats ts'ohool<sup>07</sup>; T'ot'oy ts'ohool, tsakam ts'uh<sup>07</sup>; Ehtiil mithith, bathuch ts'ohool, ik ts'ohool, thootil tsan pulik, ts'uleel thekw'eel, t'apay ts'ohool<sup>07</sup>; Xa' ts'ohool, xaa' uts'aal pulik, t'ithith i koy, pakw<sup>07</sup>; Leetsa ts'ohool tsakni', k'apwaal book', puxek' ts'ohool, <sup>07</sup>; Oot' wits, k'alul wits<sup>07</sup>; Akan t'ele', chk'te', akan chakam, tsukte<sup>07</sup>; Sakchakah, Sibik<sup>09</sup>; Xanabmukuy<sup>09</sup>; Nabalche', Nahualte<sup>09</sup>; Much'kok<sup>09</sup>; Kambalchakah<sup>09</sup>; Hobonk'ak<sup>09</sup>; Ya'axhalalche<sup>09</sup>; Yook mukuy<sup>10</sup>; Hobon Čokoh<sup>10</sup>; Ix but<sup>11</sup>; Orob<sup>12</sup>; Ixbut<sup>13</sup>; Mansaana Q'ehen<sup>14</sup>; X'lee'chi'yuk, Tul<sup>14</sup>; Xtzin' iyuk<sup>14</sup>; Ixgolondrina<sup>18</sup>; Guish mbsia'a<sup>21</sup>; Guie chien<sup>21</sup>; Nia'badu'u<sup>21</sup>; Bini<sup>22</sup>; Škwan gurak<sup>22</sup>; Guizh-biè, guizh-xlütsf, guizh-lindrîn, guizh-zhìp, zhìp-nquits<sup>23</sup>; Còrdòbân<sup>23</sup>; Pilicxitl<sup>24</sup>; Custicpascua xochitl<sup>28</sup>

Used by (21\*): Zoque<sup>01, 02, 03</sup>; Mixe<sup>04</sup>; Huastec<sup>07</sup>; Yucatecan Maya<sup>09, 10, 11</sup>; Quichean Maya<sup>12, 13, 14, 17</sup>; Western Maya<sup>18, 19</sup>; Zapotec<sup>21, 22, 23</sup>; Nahuatl<sup>24, 25, 26, 28</sup>

Used for (116#): Digestive<sup>01, 02, 03, 04, 07, 14, 21, 22</sup>; Eye<sup>03, 09, 10, 23</sup>; Ear<sup>03, 07</sup>; Cardiovascular<sup>02, 07, 14</sup>; Musculoskeletal<sup>01, 07, 18, 19, 21, 23</sup>; Neurological<sup>07, 09, 21, 23</sup>; Psychological<sup>01, 07</sup>; Respiratory<sup>02, 03, 07, 09, 14, 28</sup>; Skin<sup>01, 02, 03, 07, 09, 12, 13, 14, 18, 21, 25, 26</sup>; Endocrine<sup>02, 25</sup>; Urological<sup>02, 03, 18, 21</sup>; Pregnancy<sup>01, 07, 11, 13, 24</sup>; Female genital<sup>01, 02, 03, 04, 07, 14, 25, 28</sup>; Male genital<sup>11</sup>; General and Unspecified<sup>01, 02, 03, 04, 07, 10, 21, 22, 25</sup>; nd<sup>17</sup>

Cognates: Yuc: mukuy, hobon k'ak/cok; Zap: bini/bie/chien?;

Language contact: Hua <> Yuc; Yuc <> Quich; Hua > Highland Popoluca; Chiapas Zoq <> Hua t

## ***Eustoma* (Gentianaceae)**

Spanish names:

Indigenous names: Bioleta<sup>07</sup>; Ka'paj<sup>14</sup>

Used by (2\*): Huastec<sup>07</sup>; Quichean Maya<sup>14</sup>

Used for (3#): Digestive<sup>14</sup>; General and Unspecified<sup>07, 14</sup>

Cognates:

Language contact:

## ***Evolvulus sp.* (Convolvulaceae)**

Spanish names:

Indigenous names: Kok' centaviwil pim<sup>14</sup>

Used by (1\*): Quichean Maya<sup>14</sup>

Used for (1#): General and Unspecified<sup>14</sup>

Cognates:

Language contact:

## ***Exostema* (Rubiaceae)**

Spanish names: Chichipactli; Nazareno amargo; Quina; Quina, Hombre Grande

Indigenous names: Tzapas kuy<sup>02</sup>; Tam nazareno<sup>03</sup>; Saqi che<sup>14</sup>

Used by (4\*): Zoque<sup>02, 03</sup>; Quichean Maya<sup>12, 14</sup>

Used for (10#): Blood<sup>03</sup>; Digestive<sup>02, 03</sup>; Skin<sup>03</sup>; Endocrine<sup>02, 14</sup>; Pregnancy<sup>02, 03</sup>; Female genital<sup>03</sup>; General and Unspecified<sup>12</sup>

Cognates:

Language contact:

## ***Exothea* (Sapindaceae)**

Spanish names:

Indigenous names: T'il homte', t'il hom, bichaam te<sup>07</sup>

Used by (1\*): Huastec<sup>07</sup>

Used for (2#): Neurological<sup>07</sup>; General and Unspecified<sup>07</sup>

Cognates:

Language contact:

### ***Eysenhardtia* (Fabaceae)**

Spanish names: Cuatle, jocotil; Taray

Indigenous names: Oku'ku piake<sup>01</sup>; Chilab, chakam wayal<sup>07</sup>; Much' Che<sup>12</sup>; Yàg-guièe-guià<sup>23</sup>

Used by (4\*): Zoque<sup>01</sup>; Huastec<sup>07</sup>; Quichean Maya<sup>12</sup>; Zapotec<sup>23</sup>

Used for (15#): Blood<sup>12</sup>; Digestive<sup>01, 12, 23</sup>; Cardiovascular<sup>01</sup>; Endocrine<sup>01, 12</sup>; Urological<sup>01, 07, 12</sup>; Female genital<sup>01, 12</sup>; Male genital<sup>01</sup>; General and Unspecified<sup>07, 12</sup>

Cognates:

Language contact:

### ***Fernaldia* (Apocynaceae)**

Spanish names:

Indigenous names: T'obs'i', t'obon, kuhuw akw'aal, topts'i'<sup>07</sup>

Used by (1\*): Huastec<sup>07</sup>

Used for (3#): Digestive<sup>07</sup>; Endocrine<sup>07</sup>; General and Unspecified<sup>07</sup>

Cognates:

Language contact:

### ***Ferocactus* (Cactaceae)**

Spanish names: Biznaga

Indigenous names:

Used by (1\*): Nahuatl<sup>27</sup>

Used for (1#): Urological<sup>27</sup>

Cognates:

Language contact:

### ***Fevillea* (Cucurbitaceae)**

Spanish names: Chichimora

Indigenous names:

Used by (1\*): Western Maya<sup>19</sup>

Used for (1#): Digestive<sup>19</sup>

Cognates:

Language contact:

### ***Ficus* (Moraceae)**

Spanish names: Alamo; Amate; Amate grande/orejón; Higo; Higo, Higuerrillo / Higuera; Higuero

Indigenous names: Tzaman/jitsi<sup>01</sup>; Tsui<sup>03</sup>; Oom<sup>04</sup>; Noak<sup>04</sup>; Hopoy ts'uh<sup>07</sup>; Tsakam ts'uh<sup>07</sup>; Hopoy, ts'uh<sup>07</sup>; Kopo<sup>09</sup>; Wix<sup>12</sup>; Xq'oli hu<sup>14</sup>; Hu'u che<sup>17</sup>; Jun, ma'n jun, chu jun<sup>19</sup>; Dxuumii<sup>21</sup>

Used by (11\*): Zoque<sup>01, 03</sup>; Mixe<sup>04</sup>; Huastec<sup>07</sup>; Yucatecan Maya<sup>09</sup>; Quichean Maya<sup>12, 13, 14, 17</sup>; Western Maya<sup>19</sup>; Zapotec<sup>21</sup>

Used for (35#): Digestive<sup>04, 21</sup>; Cardiovascular<sup>12, 21</sup>; Musculoskeletal<sup>07, 12, 13, 21</sup>; Neurological<sup>07, 14</sup>; Psychological<sup>21</sup>;

Respiratory<sup>07, 09, 12, 21</sup>; Skin<sup>01, 07, 14, 19, 21</sup>; Female genital<sup>03</sup>; General and Unspecified<sup>03, 04, 07, 12, 14, 21</sup>; nd<sup>17</sup>

Cognates: Quich: hu;

Language contact: Highalnd Popoluca <> Hua & Zap; Quich <> Chortí

### ***Flaveria* (Asteraceae)**

Spanish names: Hierba del sapo; Popote

Indigenous names:

Used by (1\*): Nahuatl<sup>27</sup>

Used for (3#): Digestive<sup>27</sup>; Skin<sup>27</sup>

Cognates:

Language contact:

### ***Fleischmannia* (Asteraceae)**

Spanish names: Flor de cristalina; Mejorana

Indigenous names:

Used by (2\*): Zoque<sup>01</sup>; Quichean Maya<sup>12</sup>

Used for (9#): Digestive<sup>12</sup>; Eye<sup>01</sup>; Musculoskeletal<sup>12</sup>; Neurological<sup>12</sup>; Respiratory<sup>12</sup>; Endocrine<sup>12</sup>; Urological<sup>12</sup>; Female genital<sup>12</sup>; General and Unspecified<sup>12</sup>

Cognates:

Language contact:

### ***Flourensia* (Asteraceae)**

Spanish names: Hoja sen

Indigenous names:

Used by (1\*): Zapotec<sup>22</sup>

Used for (1#): Digestive<sup>22</sup>

Cognates:

Language contact:

### ***Foeniculum* (Apiaceae)**

Spanish names: Hinojo

Indigenous names: Diojo xuitl<sup>08</sup>; Anix<sup>13</sup>; Inajo, inaja, injo<sup>20</sup>; Guizh-hinôj, mîlt-ró-yù<sup>23</sup>; Diojo xuitl<sup>28</sup>

Used by (9\*): Zoque<sup>01</sup>; Huastec<sup>08</sup>; Quichean Maya<sup>12, 13</sup>; Western Maya<sup>20</sup>; Zapotec<sup>23</sup>; Nahua<sup>25, 26, 28</sup>

Used for (24#): Digestive<sup>01, 08, 12, 13, 20, 23, 26, 28</sup>; Ear<sup>20</sup>; Cardiovascular<sup>12</sup>; Neurological<sup>20</sup>; Psychological<sup>01, 13</sup>; Respiratory<sup>01, 12, 20, 25, 28</sup>; Skin<sup>08</sup>; Endocrine<sup>12</sup>; Pregnancy<sup>12, 13</sup>; Male genital<sup>12</sup>; General and Unspecified<sup>13</sup>

Cognates:

Language contact:

### ***Forchhammeria* (Capparaceae)**

Spanish names:

Indigenous names:

Used by (1\*): Quichean Maya<sup>14</sup>

Used for (2#): Neurological<sup>14</sup>; General and Unspecified<sup>14</sup>

Cognates:

Language contact:

### ***Fosterella* (Bromeliaceae)**

Spanish names:

Indigenous names:

Used by (1\*): Zoque<sup>03</sup>

Used for (1#): General and Unspecified<sup>03</sup>

Cognates:

Language contact:

### ***Fouquieria* (Fouquieriaceae)**

Spanish names:

Indigenous names: Yàg-guièts-zhìg, yàg-guièe-zhìg<sup>23</sup>

Used by (1\*): Zapotec<sup>23</sup>

Used for (1#): Skin<sup>23</sup>

Cognates:

Language contact:

### ***Frangula* (Rhamnaceae)**

Spanish names: Cáscara sagrada

Indigenous names:

Used by (2\*): Zoque<sup>02</sup>; Huastec<sup>08</sup>

Used for (3#): Digestive<sup>02, 08</sup>; Skin<sup>08</sup>

Cognates:

Language contact:

### ***Fraxinus* (Oleaceae)**

Spanish names: Fresno

Indigenous names: Yàg-frêsn<sup>23</sup>

Used by (3\*): Zapotec<sup>22, 23</sup>; Nahuatl<sup>26</sup>

Used for (8#): Digestive<sup>22, 23</sup>; Psychological<sup>22</sup>; Skin<sup>22</sup>; Endocrine<sup>26</sup>; Pregnancy<sup>22</sup>; General and Unspecified<sup>23, 26</sup>

Cognates:

Language contact:

### ***Fridericia* (Bignoniaceae)**

Spanish names:

Indigenous names: Pobatsay<sup>03</sup>; Ka'ax aats<sup>04</sup>; Sak-ak<sup>09</sup>

Used by (3\*): Zoque<sup>03</sup>; Mixe<sup>04</sup>; Yucatecan Maya<sup>09</sup>

Used for (3#): Skin<sup>04, 09</sup>; Female genital<sup>03</sup>

Cognates: MZ: ats;

Language contact:

### ***Fuchsia* (Onagraceae)**

Spanish names: Fuchsia

Indigenous names: Patayuc<sup>13</sup>; Sera nich vomol, tzajal kampana nichim, marabiya wamal, paj nich wamal, bik'tal rimon, batz' momol, , max te' momol, lobol ch'o, kenya jomol<sup>20</sup>

Used by (3\*): Quichean Maya<sup>12, 13</sup>; Western Maya<sup>20</sup>

Used for (5#): Digestive<sup>20</sup>; Respiratory<sup>20</sup>; Skin<sup>13</sup>; General and Unspecified<sup>12, 20</sup>

Cognates:

Language contact:

### ***Galactia* (Fabaceae)**

Spanish names: Pegapega

Indigenous names:

Used by (1\*): Yucatecan Maya<sup>11</sup>

Used for (1#): Urological<sup>11</sup>

Cognates:

Language contact:

### ***Galeana* (Asteraceae)**

Spanish names:

Indigenous names: Tsukt aay<sup>04</sup>

Used by (1\*): Mixe<sup>04</sup>

Used for (1#): Pregnancy<sup>04</sup>

Cognates:

Language contact:

### ***Galinsoga* (Asteraceae)**

Spanish names: San Nicolas

Indigenous names: Guìzh-guìè-lêch, guìè-bnîil-làs, guìè-sàntàmàř-làs, xín-guìè-sàntàmàř, guìzh-guìè-nquĩts<sup>23</sup>

Used by (2\*): Quichean Maya<sup>12</sup>; Zapotec<sup>23</sup>

Used for (2#): Digestive<sup>23</sup>; Neurological<sup>12</sup>

Cognates:

Language contact:

### ***Galium* (Rubiaceae)**

Spanish names: Pegarropa

Indigenous names: Guìzh-ngùdzii, guìzh-nàad<sup>23</sup>

Used by (3\*): Quichean Maya<sup>13</sup>; Zapotec<sup>23</sup>; Nahua<sup>25</sup>

Used for (3#): Ear<sup>23</sup>; Neurological<sup>13</sup>; Pregnancy<sup>25</sup>

Cognates:

Language contact:

### ***Galphimia* (Malpighiaceae)**

Spanish names:

Indigenous names: Tsalaam kubi', it'il chuch<sup>07</sup>; Guìzh-ncuàan-bzhiân, ncuàan-bzhiân<sup>23</sup>

Used by (2\*): Huastec<sup>07</sup>; Zapotec<sup>23</sup>

Used for (2#): Psychological<sup>23</sup>; Skin<sup>07</sup>

Cognates:

Language contact:

### ***Garcia* (Euphorbiaceae)**

Spanish names:

Indigenous names: Thokb ot'el<sup>07</sup>

Used by (1\*): Huastec<sup>07</sup>

Used for (1#): Psychological<sup>07</sup>

Cognates:

Language contact:

### ***Garcinia* (Clusiaceae)**

Spanish names:

Indigenous names: Uouo<sup>03</sup>

Used by (1\*): Zoque<sup>03</sup>

Used for (3#): Eye<sup>03</sup>; Skin<sup>03</sup>; Female genital<sup>03</sup>

Cognates:

Language contact:

### ***Gardenia* (Rubiaceae)**

Spanish names: Gardenia

Indigenous names:

Used by (3\*): Zoque<sup>02, 03</sup>; Nahua<sup>26</sup>

Used for (4#): Digestive<sup>03</sup>; Cardiovascular<sup>02</sup>; Musculoskeletal<sup>03</sup>; Respiratory<sup>26</sup>

Cognates:

Language contact:

### ***Gaudichaudia* (Malpighiaceae)**

Spanish names: Hoja de culebra

Indigenous names: Tzajin poj<sup>02</sup>

Used by (1\*): Zoque<sup>02</sup>

Used for (1#): Musculoskeletal<sup>02</sup>

Cognates:

Language contact:

### ***Gaultheria* (Ericaceae)**

Spanish names: Axocopac

Indigenous names: Toka tzasa<sup>01</sup>; Tecolx'ma'palxch'ma<sup>06</sup>; Atres wamal<sup>20</sup>; Axocopa<sup>26</sup>

Used by (4\*): Zoque<sup>01</sup>; Totonac<sup>06</sup>; Western Maya<sup>20</sup>; Nahua<sup>26</sup>

Used for (7#): Digestive<sup>20</sup>; Musculoskeletal<sup>01</sup>; Respiratory<sup>06</sup>; Pregnancy<sup>01</sup>; Female genital<sup>01</sup>; General and Unspecified<sup>06, 26</sup>

Cognates:

Language contact:

### ***Gaya* (Malvaceae)**

Spanish names:

Indigenous names: Xpupul-ik<sup>09</sup>

Used by (1\*): Yucatecan Maya<sup>09</sup>

Used for (2#): Digestive<sup>09</sup>; Skin<sup>09</sup>

Cognates:

Language contact:

### ***Genipa* (Rubiaceae)**

Spanish names: Maluku

Indigenous names: Nuk tɣm<sup>03</sup>

Used by (2\*): Zoque<sup>02, 03</sup>

Used for (2#): Digestive<sup>02</sup>; General and Unspecified<sup>03</sup>

Cognates:

Language contact:

### ***Geophila* (Rubiaceae)**

Spanish names:

Indigenous names: Ixim Q'en<sup>14</sup>

Used by (1\*): Quichean Maya<sup>14</sup>

Used for (1#): Digestive<sup>14</sup>

Cognates:

Language contact:

### ***Geranium* (Geraniaceae)**

Spanish names: Sanícula

Indigenous names:

Used by (1\*): Quichean Maya<sup>12</sup>

Used for (4#): Eye<sup>12</sup>; Skin<sup>12</sup>; Urological<sup>12</sup>; General and Unspecified<sup>12</sup>

Cognates:

Language contact:

### ***Gibasis* (Commelinaceae)**

Spanish names:

Indigenous names: Xwa ixul<sup>14</sup>; Madali<sup>21</sup>

Used by (2\*): Quichean Maya<sup>14</sup>; Zapotec<sup>21</sup>

Used for (2#): Skin<sup>14, 21</sup>

Cognates:

Language contact:

### ***Ginkgo* (Ginkgoaceae)**

Spanish names: Ginkgo Biloba

Indigenous names:

Used by (1\*): Quichean Maya<sup>12</sup>

Used for (4#): Cardiovascular<sup>12</sup>; Musculoskeletal<sup>12</sup>; Neurological<sup>12</sup>; Psychological<sup>12</sup>

Cognates:

Language contact:

### ***Gladiolus* (Iridaceae)**

Spanish names: Gladiola

Indigenous names:

Used by (1\*): Quichean Maya<sup>12</sup>

Used for (2#): Skin<sup>12</sup>; General and Unspecified<sup>12</sup>

Cognates:

Language contact:

### ***Glandularia* (Verbenaceae)**

Spanish names: Alfombrilla cimarrón

Indigenous names: Waleklaab ts'ohool, ehék walek, tsamnek ts'ohool, thuhál ts'ohool, thuhual ichich<sup>07</sup>; Ncuàan-dzéb-cônch, guìzh-cônch, guìzh-ncuàan-x-cônch<sup>23</sup>

Used by (3\*): Huastec<sup>07</sup>; Zapotec<sup>23</sup>; Nahua<sup>26</sup>

Used for (4#): Skin<sup>07, 26</sup>; General and Unspecified<sup>07, 23</sup>

Cognates:

Language contact:

### ***Gliricidia* (Fabaceae)**

Spanish names: Cacao de nance, madre cacao; Cocohuite; Cocohuite/mataratón; Cocoite; Cocuite; Madre de Cacao; Madre cacao; Sacahuite

Indigenous names: Tzang kuy/oyo nuk/sawin kuy<sup>01</sup>; Tzawin kuy/ jâyä kuy<sup>02</sup>; Paaki<sup>03</sup>; Tsøøk<sup>04</sup>; Zakh'akh'a tasun<sup>08</sup>; Kante<sup>14</sup>; Aj chänte<sup>18</sup>; K'an te<sup>19</sup>; Guianixa'a<sup>21</sup>

Used by (10\*): Zoque<sup>01, 02, 03</sup>; Mixe<sup>04</sup>; Totonac<sup>05</sup>; Huastec<sup>08</sup>; Quichean Maya<sup>14</sup>; Western Maya<sup>18, 19</sup>; Zapotec<sup>21</sup>

Used for (26#): Digestive<sup>01, 02</sup>; Eye<sup>18</sup>; Neurological<sup>01, 02, 03, 19</sup>; Psychological<sup>21</sup>; Respiratory<sup>05, 08, 18</sup>; Skin<sup>02, 03, 19, 21</sup>; Urological<sup>02, 21</sup>; General and Unspecified<sup>01, 02, 03, 04, 05, 14, 18, 19, 21</sup>

Cognates: Zoq: sawin kuy; CoreM: kante;

Language contact:

### ***Gnaphalium* (Asteraceae)**

Spanish names: Algodoncito; Gordolobo; Gordolobo macho; Gordolobo, flor de seda, sanalotodo; Gordolobo, Sanalotodo

Indigenous names: Poma ay cimarrón<sup>03</sup>; Wo'opt aay<sup>04</sup>; B'ojq'aos<sup>12</sup>; Saq' Mak'el Q'os<sup>12</sup>; Uxkin imul, uxquin imul<sup>13</sup>; Tafiātu gueexii<sup>21</sup>; Ixcaxihuitl<sup>26</sup>

Used by (6\*): Zoque<sup>03</sup>; Mixe<sup>04</sup>; Quichean Maya<sup>12, 13</sup>; Zapotec<sup>21</sup>; Nahua<sup>26</sup>

Used for (25#): Digestive<sup>04, 12, 21</sup>; Neurological<sup>12</sup>; Respiratory<sup>03, 12, 13, 21</sup>; Skin<sup>03, 12, 13, 21, 26</sup>; Pregnancy<sup>03, 21</sup>; Female genital<sup>12</sup>; General and Unspecified<sup>03, 12, 21</sup>

Cognates:

Language contact:

### ***Godmania* (Bignoniaceae)**

Spanish names:

Indigenous names: Xo'k'ab<sup>09</sup>

Used by (1\*): Yucatecan Maya<sup>09</sup>

Used for (2#): Pregnancy<sup>09</sup>; Female genital<sup>09</sup>

Cognates:

Language contact:

### ***Gomphrena* (Amaranthaceae)**

Spanish names: Amor Secco; Tinta roja

Indigenous names: Jꞑpak mooya<sup>03</sup>; T'oyol<sup>07</sup>; Pitunche<sup>12</sup>; Ku' qehen<sup>14</sup>; Gueyana<sup>21</sup>; Guizh-guiét-ni<sup>23</sup>

Used by (6\*): Zoque<sup>03</sup>; Huastec<sup>07</sup>; Quichean Maya<sup>12, 14</sup>; Zapotec<sup>21, 23</sup>

Used for (14#): Digestive<sup>07, 14, 21, 23</sup>; Psychological<sup>12</sup>; Urological<sup>03, 23</sup>; Pregnancy<sup>03, 12</sup>; Female genital<sup>03</sup>; General and Unspecified<sup>03, 12, 21</sup>

Cognates:

Language contact:

### ***Goniophlebium* (Polypodiaceae)**

Spanish names: Doradilla

Indigenous names:

Used by (1\*): Zoque<sup>01</sup>

Used for (1#): General and Unspecified<sup>01</sup>

Cognates:

Language contact:

### ***Gonolobus* (Apocynaceae)**

Spanish names: Candua; Yoyos

Indigenous names: Kontua<sup>02</sup>; U'ii<sup>06</sup>; Ooy<sup>07</sup>; Batuguexe'e<sup>21</sup>

Used by (4\*): Zoque<sup>02</sup>; Totonac<sup>06</sup>; Huastec<sup>07</sup>; Zapotec<sup>21</sup>

Used for (5#): Digestive<sup>06</sup>; Skin<sup>07</sup>; Female genital<sup>02</sup>; General and Unspecified<sup>02, 21</sup>

Cognates:

Language contact: Tot <> Hua

### ***Gonzalagunia* (Rubiaceae)**

Spanish names:

Indigenous names: Tzu'ul che<sup>16</sup>; Tzuul che<sup>17</sup>

Used by (2\*): Quichean Maya<sup>16, 17</sup>

Used for (2#): Neurological<sup>16</sup>; nd<sup>17</sup>

Cognates:

Language contact:

### ***Gossypium* (Malvaceae)**

Spanish names: Algodón; Algodon gris

Indigenous names: Kwinim, tsokoy<sup>07</sup>; Taman<sup>09</sup>; Chuy-taman<sup>09</sup>; Taman<sup>10</sup>; Noq<sup>14</sup>; Shiila'a<sup>21</sup>; Yàg-zhïil<sup>23</sup>

Used by (7\*): Zoque<sup>01</sup>; Huastec<sup>07</sup>; Yucatecan Maya<sup>09, 10</sup>; Quichean Maya<sup>14</sup>; Zapotec<sup>21, 23</sup>

Used for (17#): Digestive<sup>07, 21</sup>; Musculoskeletal<sup>07, 21</sup>; Respiratory<sup>07, 09, 10, 14</sup>; Skin<sup>07, 21</sup>; Urological<sup>01, 07, 21</sup>; Pregnancy<sup>07</sup>; General and Unspecified<sup>21, 23</sup>

Cognates: Yuc: taman; Zap: xiiil;

Language contact:



### ***Gouania* (Rhamnaceae)**

Spanish names: Jaboncillo liso

Indigenous names: Tzaku pu/Tzaj upu<sup>01</sup>; Xiapun tsay<sup>03</sup>; Xajts oo'ts aats<sup>04</sup>; Thuhah ts'aah<sup>07</sup>; X-om-ak<sup>09</sup>; Ch'jom k'aham<sup>17</sup>

Used by (6\*): Zoque<sup>01, 03</sup>; Mixe<sup>04</sup>; Huastec<sup>07</sup>; Yucatecan Maya<sup>09</sup>; Quichean Maya<sup>17</sup>

Used for (11#): Musculoskeletal<sup>03</sup>; Skin<sup>01, 03, 04, 07, 09</sup>; Female genital<sup>03</sup>; General and Unspecified<sup>03, 07</sup>; nd<sup>17</sup>

Cognates: MZ: tsaj/tsats;

Language contact: MZ > Hua

### ***Govenia* (Orchidaceae)**

Spanish names: Flor blanca

Indigenous names: Popoj jäyã<sup>01</sup>

Used by (1\*): Zoque<sup>01</sup>

Used for (1#): Digestive<sup>01</sup>

Cognates:

Language contact:

### ***Grevillea* (Proteaceae)**

Spanish names: Grabilea

Indigenous names:

Used by (1\*): Quichean Maya<sup>12</sup>

Used for (1#): Psychological<sup>12</sup>

Cognates:

Language contact:

### ***Gronovia* (Loasaceae)**

Spanish names: Chaya

Indigenous names: Tzis kä wang<sup>02</sup>; Laalmuch<sup>09</sup>

Used by (2\*): Zoque<sup>02</sup>; Yucatecan Maya<sup>09</sup>

Used for (2#): Musculoskeletal<sup>09</sup>; Neurological<sup>02</sup>

Cognates:

Language contact:

### ***Guadua* (Poaceae)**

Spanish names:

Indigenous names: Tsahib, chahib<sup>07</sup>

Used by (1\*): Huastec<sup>07</sup>

Used for (4#): Musculoskeletal<sup>07</sup>; Skin<sup>07</sup>; Pregnancy<sup>07</sup>; General and Unspecified<sup>07</sup>

Cognates:

Language contact:

### ***Guaicum* (Zygophyllaceae)**

Spanish names: Balsamo; Guayacan

Indigenous names: Hueycán<sup>08</sup>

Used by (2\*): Huastec<sup>08</sup>; Zapotec<sup>21</sup>

Used for (3#): Skin<sup>21</sup>; Endocrine<sup>08</sup>; General and Unspecified<sup>21</sup>

Cognates:

Language contact:

### ***Guarea* (Meliaceae)**

Spanish names:

Indigenous names: Bolb<sup>16</sup>

Used by (1\*): Quichean Maya<sup>16</sup>

Used for (1#): General and Unspecified<sup>16</sup>

Cognates:

Language contact:

### ***Guazuma* (Malvaceae)**

Spanish names: Caulote; Caulote/tapaculo; Guacima; Guácimo; Guazimo

Indigenous names: Topaku/tzapas äkō/äkä<sup>01</sup>; Äkä<sup>02</sup>; ¥k¥<sup>03</sup>; Øøk<sup>04</sup>; Akgexta<sup>06</sup>; Akich<sup>07</sup>; Pixoy, Nohoch-pixoy<sup>09</sup>; Pixoy<sup>11</sup>; Tchabei<sup>14</sup>; Ajsxuyuy<sup>18</sup>; Ch'ab'ay<sup>19</sup>; Yana'a<sup>21</sup>

Used by (12\*): Zoque<sup>01, 02, 03</sup>; Mixe<sup>04</sup>; Totonac<sup>06</sup>; Huastec<sup>07</sup>; Yucatecan Maya<sup>09, 11</sup>; Quichean Maya<sup>14</sup>; Western Maya<sup>18, 19</sup>; Zapotec<sup>21</sup>

Used for (34#): Blood<sup>03</sup>; Digestive<sup>01, 02, 03, 04, 06, 07, 11, 14, 18, 19, 21</sup>; Cardiovascular<sup>18</sup>; Neurological<sup>21</sup>; Psychological<sup>18</sup>; Respiratory<sup>02, 03, 07</sup>; Skin<sup>02, 03, 07, 18</sup>; Endocrine<sup>03</sup>; Pregnancy<sup>03, 07, 09</sup>; Female genital<sup>02, 03, 04</sup>; Male genital<sup>01</sup>; General and Unspecified<sup>02, 03, 07, 21</sup>

Cognates: MZ: äk(ä); Zoq: äkä; CoreM: chabai; Yuc: pixoy;

Language contact: MZ > Tot & Hua

### ***Gurania* (Cucurbitaceae)**

Spanish names:

Indigenous names: Susum Sankh<sup>14</sup>; K'uum pim<sup>17</sup>

Used by (2\*): Quichean Maya<sup>14, 17</sup>

Used for (2#): General and Unspecified<sup>14</sup>nd<sup>17</sup>

Cognates:

Language contact:

### ***Gymnopodium* (Polygonaceae)**

Spanish names:

Indigenous names: Ts'its'ilche<sup>09</sup>

Used by (1\*): Yucatecan Maya<sup>09</sup>

Used for (1#): Respiratory<sup>09</sup>

Cognates:

Language contact:

### ***Gynerium* (Poaceae)**

Spanish names: Caña brava

Indigenous names:

Used by (1\*): Yucatecan Maya<sup>10</sup>

Used for (2#): Urological<sup>10</sup>; Female genital<sup>10</sup>

Cognates:

Language contact:

### ***Gypsacanthus* (Acanthaceae)**

Spanish names: Tiricia

Indigenous names:

Used by (1\*): Nahua<sup>27</sup>

Used for (1#): General and Unspecified<sup>27</sup>

Cognates:

Language contact:

### ***Gyrotaenia* (Urticaceae)**

Spanish names: Mala mujer

Indigenous names: Si'in geno<sup>01</sup>

Used by (1\*): Zoque<sup>01</sup>

Used for (1#): Skin<sup>01</sup>

Cognates:

Language contact:

### ***Haematoxylum* (Fabaceae)**

Spanish names: Brasil; Palo brasil; Tinto

Indigenous names: Chäkete<sup>18</sup>

Used by (3\*): Zoque<sup>01</sup>; Western Maya<sup>18</sup>; Zapotec<sup>21</sup>

Used for (7#): Blood<sup>21</sup>; Digestive<sup>18, 21</sup>; Endocrine<sup>01</sup>; Urological<sup>01</sup>; General and Unspecified<sup>18, 21</sup>

Cognates:

Language contact:

### ***Hamelia* (Rubiaceae)**

Spanish names: Baletilla; Canserina del monte; Chacloco; Chichipín; Corallo; Coyolillo, Cosocoyole, Chupacoyole; Madura zapote

Indigenous names: Tondon ay/ tzan ay/ tzan jäyã<sup>01</sup>; Chochoday, Cangchocho, Cuma ay<sup>03</sup>; Maktantulonkis, akajetantulungush, tanchulukx kiui<sup>05</sup>; Tsak look', k'entsul te', chak ch'ohool, chak look<sup>07</sup>; K'entsel te<sup>08</sup>; Ele'kabi, K'anan<sup>09</sup>; Šk'anang<sup>10</sup>; Ik k'anän<sup>11</sup>; Saq'ib Q'eheh<sup>14</sup>; Ratzum Tz'unun, Ruk'a Tz'unun<sup>14</sup>; Chaj' mash<sup>16</sup>; Cacahuaxochitl<sup>24</sup>

Used by (15\*): Zoque<sup>01, 02, 03</sup>; Totonac<sup>05</sup>; Huastec<sup>07, 08</sup>; Yucatecan Maya<sup>09, 10, 11</sup>; Quichean Maya<sup>12, 14, 16</sup>; Zapotec<sup>21</sup>; Nahua<sup>24, 25</sup>

Used for (51#): Blood<sup>05, 07, 08</sup>; Digestive<sup>01, 05, 07, 08, 12, 24, 25</sup>; Eye<sup>03</sup>; Musculoskeletal<sup>01, 05</sup>; Neurological<sup>05, 16</sup>; Psychological<sup>12</sup>; Respiratory<sup>01, 05, 14</sup>; Skin<sup>01, 03, 05, 07, 08, 09, 10, 11, 14, 21, 24, 25</sup>; Endocrine<sup>03, 05, 08, 12</sup>; Urological<sup>02, 07, 25</sup>; Pregnancy<sup>24</sup>; Female genital<sup>03, 05, 14, 21, 24</sup>; General and Unspecified<sup>01, 03, 05, 07, 12, 14</sup>

Cognates: Hua: kentsVI; Yuc: k'anan;

Language contact: Chiapas Zoq <> Hua <> Kekchí

### ***Hampea* (Malvaceae)**

Spanish names: Majahua

Indigenous names: Tsákolte<sup>18</sup>

Used by (1\*): Western Maya<sup>18</sup>

Used for (3#): Digestive<sup>18</sup>; Neurological<sup>18</sup>; General and Unspecified<sup>18</sup>

Cognates:

Language contact:

### ***Hanburia* (Cucurbitaceae)**

Spanish names:

Indigenous names: Wawi yomdak<sup>01</sup>

Used by (1\*): Zoque<sup>01</sup>

Used for (1#): Skin<sup>01</sup>

Cognates:

Language contact:

### ***Handroanthus* (Bignoniaceae)**

Spanish names: Guayacán; Roble

Indigenous names: B'ajeer<sup>14</sup>; Uayakan<sup>18</sup>

Used by (4\*): Zoque<sup>01</sup>; Quichean Maya<sup>14</sup>; Western Maya<sup>18</sup>; Zapotec<sup>21</sup>

Used for (5#): Digestive<sup>14</sup>; Musculoskeletal<sup>21</sup>; Skin<sup>21</sup>; Endocrine<sup>01, 18</sup>

Cognates:

Language contact:

### ***Harpalyce* (Fabaceae)**

Spanish names:

Indigenous names: K'ante<sup>07</sup>

Used by (1\*): Huastec<sup>07</sup>

Used for (1#): Digestive<sup>07</sup>

Cognates:

Language contact:

### ***Havardia* (Fabaceae)**

Spanish names:

Indigenous names: Chukum<sup>09</sup>

Used by (1\*): Yucatecan Maya<sup>09</sup>

Used for (1#): Skin<sup>09</sup>

Cognates:

Language contact:

### ***Hebanthe* (Amaranthaceae)**

Spanish names:

Indigenous names: Kʷkujuki ay<sup>03</sup>

Used by (1\*): Zoque<sup>03</sup>

Used for (1#): Skin<sup>03</sup>

Cognates:

Language contact:

### ***Hechtia* (Bromeliaceae)**

Spanish names: Lasolmic

Indigenous names: Laxomic<sup>28</sup>

Used by (1\*): Nahua<sup>28</sup>

Used for (1#): Digestive<sup>28</sup>

Cognates:

Language contact:

### ***Hedeoma* (Lamiaceae)**

Spanish names:

Indigenous names: Maal t'eel, tsakam polello<sup>07</sup>

Used by (1\*): Huastec<sup>07</sup>

Used for (4#): Digestive<sup>07</sup>; Respiratory<sup>07</sup>; Pregnancy<sup>07</sup>; General and Unspecified<sup>07</sup>

Cognates:

Language contact:

### ***Hedychium* (Zingiberaceae)**

Spanish names: Mariposa

Indigenous names:

Used by (1\*): Zoque<sup>01</sup>

Used for (3#): Musculoskeletal<sup>01</sup>; Skin<sup>01</sup>; General and Unspecified<sup>01</sup>

Cognates:

Language contact:

### ***Heimia* (Lythraceae)**

Spanish names: Sinicuichi; Sobadora

Indigenous names: Maan witsiil<sup>07</sup>; Ncuàan-yãas<sup>23</sup>; Icxinicuiltzin<sup>26</sup>

Used by (4\*): Huastec<sup>07</sup>; Zapotec<sup>21, 23</sup>; Nahua<sup>26</sup>

Used for (8#): Digestive<sup>26</sup>; Musculoskeletal<sup>21, 23, 26</sup>; Neurological<sup>26</sup>; Skin<sup>23</sup>; General and Unspecified<sup>07, 23</sup>

Cognates:

Language contact:

### ***Helenium* (Asteraceae)**

Spanish names: Floricilla

Indigenous names: Hats'ix wits, hats'ix kw'eet, chemthak i ch'ak<sup>07</sup>; Guièe-sàntàmàri-mòntês, guièe-sàntàmàri-dán, guièe-sàntàmàri-nguèts, guièe-sàntàmàri-gùts, guièe-sàntàmàri-mòstêz<sup>23</sup>

Used by (3\*): Huastec<sup>07</sup>; Quichean Maya<sup>13</sup>; Zapotec<sup>23</sup>

Used for (3#): Respiratory<sup>13, 23</sup>; Skin<sup>07</sup>

Cognates:

Language contact:

### ***Helianthemum* (Cistaceae)**

Spanish names: Cenicero

Indigenous names: Xmasakh'e pak'a<sup>08</sup>; Vach' t'ul, tan vomol, tantan wamal, tan bak wamal, k'anal nich te', k'anal nich wach', vach' te' vomol, k'ujk'ul wamal<sup>20</sup>; Gbày-tæ, guizh-òrègànò-dán<sup>23</sup>

Used by (3\*): Huastec<sup>08</sup>; Western Maya<sup>20</sup>; Zapotec<sup>23</sup>

Used for (12#): Digestive<sup>08, 20</sup>; Eye<sup>20</sup>; Ear<sup>20</sup>; Musculoskeletal<sup>08, 20</sup>; Respiratory<sup>20</sup>; Skin<sup>20, 23</sup>; Male genital<sup>20</sup>; General and Unspecified<sup>20, 23</sup>

Cognates:

Language contact:

### ***Heliconia* (Heliconiaceae)**

Spanish names: Calambre Negro ; Platanillo

Indigenous names: Tsabats ay<sup>03</sup>; Lištampán<sup>05</sup>; Ts'umts'um, thulup<sup>07</sup>; Q'eq'i mox Kej<sup>14</sup>; Huahua<sup>21</sup>

Used by (5\*): Zoque<sup>03</sup>; Totonac<sup>05</sup>; Huastec<sup>07</sup>; Quichean Maya<sup>14</sup>; Zapotec<sup>21</sup>

Used for (9#): Digestive<sup>14</sup>; Musculoskeletal<sup>14</sup>; Urological<sup>03</sup>; Female genital<sup>03, 07</sup>; General and Unspecified<sup>05, 21</sup>

Cognates:

Language contact:

### ***Helicteres* (Malvaceae)**

Spanish names:

Indigenous names: Ang Tzatz<sup>02</sup>; Piniaka<sup>03</sup>; Tsutup, Suput<sup>09</sup>

Used by (3\*): Zoque<sup>02, 03</sup>; Yucatecan Maya<sup>09</sup>

Used for (5#): Neurological<sup>03</sup>; Psychological<sup>02</sup>; Skin<sup>09</sup>; Pregnancy<sup>03</sup>; Female genital<sup>03</sup>

Cognates:

Language contact:

### ***Heliocarpus* (Malvaceae)**

Spanish names: Jonote; Majagua; Majagua caballín; Majagua rojo; Palo de majagua

Indigenous names: (Tzapas) po'a<sup>01</sup>; Po'a<sup>02</sup>; Panats<sup>03</sup>; Pa'ants<sup>04</sup>; Xunic<sup>05</sup>; Baat<sup>07</sup>; Kaq'i B'ach<sup>14</sup>; Lajsa'a boogui<sup>21</sup>; Yaga lajsa'a<sup>21</sup>; Lajtz<sup>21</sup>; Ixhuaeque<sup>24</sup>

Used by (9\*): Zoque<sup>01, 02, 03</sup>; Mixe<sup>04</sup>; Totonac<sup>05</sup>; Huastec<sup>07</sup>; Quichean Maya<sup>14</sup>; Zapotec<sup>21</sup>; Nahua<sup>24</sup>

Used for (26#): Digestive<sup>03, 05, 07, 21</sup>; Musculoskeletal<sup>21</sup>; Respiratory<sup>07</sup>; Skin<sup>01, 02, 03, 04, 05, 07, 21</sup>; Urological<sup>03, 14</sup>; Pregnancy<sup>03, 05, 07, 14, 24</sup>; General and Unspecified<sup>01, 07, 14, 21</sup>

Cognates: MZ: panats/pa'ants; Zoq: po'a; Maya: baat/b'ach;

Language contact: MZ <> Maya

### ***Heliopsis* (Asteraceae)**

Spanish names:

Indigenous names: Mansaana Q'ehen<sup>14</sup>

Used by (1\*): Quichean Maya<sup>14</sup>

Used for (1#): General and Unspecified<sup>14</sup>

Cognates:

Language contact:

### ***Heliotropium* (Boraginaceae)**

Spanish names: Cabeza de guajalote blanco; Cola de alacrán; Cola de alacran, hoja de guajalote; Cola de alacrán/riñonina; Hoja de alacrán del monte; Hoja de alacrán/cola de alacran; Rabo de mico; Rabomico

Indigenous names: Kaku'e tuts<sup>01</sup>; Kaku'e ay<sup>02</sup>; Ma'ne' kinä/kaku'we ay<sup>02</sup>; Tunok kiñi<sup>03</sup>; No'ot ujts<sup>04</sup>; Thiniy ts'ohool, weew thiniy<sup>07</sup>; Xnema'ax<sup>09</sup>; Nej ajpum<sup>18</sup>; Guixamberu'u quitzii<sup>21</sup>; Guixamberu'u<sup>21</sup>

Used by (10\*): Zoque<sup>01, 02, 03</sup>; Mixe<sup>04</sup>; Huastec<sup>07</sup>; Yucatecan Maya<sup>09, 11</sup>; Quichean Maya<sup>14</sup>; Western Maya<sup>18</sup>; Zapotec<sup>21</sup>

Used for (36#): Digestive<sup>01, 02, 03, 09, 11, 18, 21</sup>; Ear<sup>03</sup>; Cardiovascular<sup>02</sup>; Musculoskeletal<sup>02, 03</sup>; Neurological<sup>07</sup>; Skin<sup>01, 02, 03, 07, 18, 21</sup>; Urological<sup>01, 02, 03, 14</sup>; Pregnancy<sup>02, 07</sup>; Female genital<sup>02, 03, 04, 21</sup>; Male genital<sup>02</sup>; General and Unspecified<sup>21</sup>

Cognates: Zoq: kinV, kaku'e;

Language contact: Zoq > Hua

### ***Hemionitis* (Pteridaceae)**

Spanish names: Hierba del gato

Indigenous names: Guish misht'daj<sup>21</sup>

Used by (1\*): Zapotec<sup>21</sup>

Used for (2#): Skin<sup>21</sup>; General and Unspecified<sup>21</sup>

Cognates:

Language contact:

### ***Henriettella* (Melastomataceae)**

Spanish names:

Indigenous names: Ixq Q'een<sup>15</sup>

Used by (1\*): Quichean Maya<sup>15</sup>

Used for (1#): Pregnancy<sup>15</sup>

Cognates:

Language contact:

### ***Herissantia* (Malvaceae)**

Spanish names:

Indigenous names:

Used by (1\*): Huastec<sup>07</sup>

Used for (1#): Urological<sup>07</sup>

Cognates:

Language contact:

### ***Heterocentron* (Melastomataceae)**

Spanish names: Caña agria; Caña de Cristo

Indigenous names: Tzapas mankuy yajkuy<sup>02</sup>; Chäm aji<sup>12</sup>

Used by (2\*): Zoque<sup>02</sup>; Quichean Maya<sup>12</sup>

Used for (11#): Blood<sup>12</sup>; Digestive<sup>12</sup>; Cardiovascular<sup>12</sup>; Musculoskeletal<sup>12</sup>; Respiratory<sup>12</sup>; Skin<sup>02</sup>; Endocrine<sup>02, 12</sup>; Urological<sup>02</sup>; Female genital<sup>12</sup>; General and Unspecified<sup>12</sup>

Cognates:

Language contact:

### ***Heteropterys* (Malpighiaceae)**

Spanish names:

Indigenous names: Patan tsay, Tsay uouo, Tʼʼts kunekne<sup>03</sup>; Meeme ay<sup>03</sup>

Used by (1\*): Zoque<sup>03</sup>

Used for (6#): Digestive<sup>03</sup>; Urological<sup>03</sup>; Female genital<sup>03</sup>

Cognates:

Language contact:

### ***Heterotheca* (Asteraceae)**

Spanish names: Arnica

Indigenous names:

Used by (2\*): Nahua<sup>25, 26</sup>

Used for (7#): Digestive<sup>25</sup>; Musculoskeletal<sup>25, 26</sup>; Skin<sup>25, 26</sup>; Urological<sup>25</sup>; General and Unspecified<sup>25</sup>

Cognates:

Language contact:

### ***Hevea* (Euphorbiaceae)**

Spanish names: Pindule

Indigenous names: Juñi<sup>03</sup>

Used by (1\*): Zoque<sup>03</sup>

Used for (1#): Skin<sup>03</sup>

Cognates:

Language contact:

### ***Hibiscus* (Malvaceae)**

Spanish names: Algodoncillo; Clavel; Flor de jamaica; Jamaica; Rosa de Jamaica; Tulipán; Tulipan del cerro; Tulipán rojo

Indigenous names: Tioch puk ay<sup>03</sup>; Thoot wits, manath ts'ohool, uxumlaab ts'ohool<sup>07</sup>; Tulipaan<sup>07</sup>; Utz Uj<sup>15</sup>

Used by (14\*): Zoque<sup>01, 02, 03</sup>; Totonac<sup>06</sup>; Huastec<sup>07</sup>; Yucatecan Maya<sup>09</sup>; Quichean Maya<sup>12, 13, 14, 15, 16</sup>; Western Maya<sup>18</sup>; Zapotec<sup>21</sup>; Nahua<sup>24</sup>

Used for (44#): Blood<sup>12, 21</sup>; Digestive<sup>03, 12, 14, 18, 21</sup>; Cardiovascular<sup>01</sup>; Musculoskeletal<sup>12</sup>; Neurological<sup>03, 12, 16</sup>; Psychological<sup>02, 15, 24</sup>; Respiratory<sup>01, 02, 03, 09, 21</sup>; Skin<sup>02</sup>; Endocrine<sup>12</sup>; Urological<sup>01, 02, 12, 18</sup>; Pregnancy<sup>07, 14, 15, 24</sup>; Female genital<sup>01, 03, 07</sup>; General and Unspecified<sup>01, 02, 03, 06, 07, 12, 13, 21</sup>

Cognates:

Language contact:

### ***Hidalgoa* (Asteraceae)**

Spanish names: Cogollo de sarpullido

Indigenous names: Ting puy tzäpä<sup>02</sup>; Pitx ay<sup>03</sup>

Used by (2\*): Zoque<sup>02, 03</sup>

Used for (3#): Eye<sup>03</sup>; Skin<sup>02, 03</sup>

Cognates:

Language contact:

### ***Hilaria* (Poaceae)**

Spanish names:

Indigenous names:

Used by (1\*): Huastec<sup>07</sup>

Used for (1#): Digestive<sup>07</sup>

Cognates:

Language contact:

### ***Hintonia* (Rubiaceae)**

Spanish names: Quina / Hombre Grande

Indigenous names: K'ailaj Che<sup>12</sup>

Used by (1\*): Quichean Maya<sup>12</sup>

Used for (4#): Digestive<sup>12</sup>; Respiratory<sup>12</sup>; Endocrine<sup>12</sup>; General and Unspecified<sup>12</sup>

Cognates:

Language contact:

### ***Hippobroma* (Campanulaceae)**

Spanish names: Acapa de monte

Indigenous names: Samat' pim<sup>14</sup>

Used by (2\*): Quichean Maya<sup>14, 17</sup>

Used for (6#): Digestive<sup>14</sup>; Musculoskeletal<sup>14</sup>; Neurological<sup>14</sup>; Skin<sup>14</sup>; General and Unspecified<sup>14</sup>; nd<sup>17</sup>

Cognates:

Language contact:

### ***Hirtella* (Chrysobalanaceae)**

Spanish names:

Indigenous names: Tsus pet cuy<sup>03</sup>; Tʼkchi cuy<sup>03</sup>

Used by (1\*): Zoque<sup>03</sup>

Used for (2#): Digestive<sup>03</sup>; Female genital<sup>03</sup>

Cognates:

Language contact:

### ***Hoffmannia* (Rubiaceae)**

Spanish names: Calechilla; Hoja de rayo

Indigenous names: Mä tane, mä teks<sup>01</sup>; Masan ay, Tsʼʼb ay<sup>03</sup>

Used by (3\*): Zoque<sup>01, 03</sup>; Nahua<sup>25</sup>

Used for (4#): Ear<sup>25</sup>; Skin<sup>01, 03</sup>; General and Unspecified<sup>01</sup>

Cognates:

Language contact:

### ***Hordeum* (Poaceae)**

Spanish names: Cebada

Indigenous names:

Used by (5\*): Zoque<sup>01, 02</sup>; Quichean Maya<sup>12, 13</sup>; Western Maya<sup>19</sup>

Used for (10#): Digestive<sup>01, 13</sup>; Neurological<sup>13</sup>; Urological<sup>01, 12</sup>; Male genital<sup>12</sup>; General and Unspecified<sup>02, 12, 13, 19</sup>

Cognates:

Language contact:

### ***Humulus* (Cannabaceae)**

Spanish names: Lúpulo

Indigenous names: Musuche' Aq'om<sup>12</sup>

Used by (1\*): Quichean Maya<sup>12</sup>

Used for (5#): Digestive<sup>12</sup>; Cardiovascular<sup>12</sup>; Musculoskeletal<sup>12</sup>; Psychological<sup>12</sup>; Urological<sup>12</sup>

Cognates:

Language contact:



### ***Hura* (Euphorbiaceae)**

Spanish names: Empurga; Jabilla

Indigenous names:

Used by (2\*): Mixe<sup>04</sup>; Zapotec<sup>21</sup>

Used for (2#): Digestive<sup>04, 21</sup>

Cognates:

Language contact:

### ***Hybanthus* (Violaceae)**

Spanish names: Hierba de San Antonio; Hoja de verruga; Trébol; Yerba familia

Indigenous names: Nekx cuy<sup>03</sup>; T'ithith t'eel<sup>07</sup>; Xpluxion xiw<sup>09</sup>; Sakbakelkam<sup>09</sup>

Used by (6\*): Zoque<sup>03</sup>; Huastec<sup>07</sup>; Yucatecan Maya<sup>09</sup>; Quichean Maya<sup>13</sup>; Western Maya<sup>18</sup>; Nahua<sup>24</sup>

Used for (11#): Digestive<sup>07</sup>; Ear<sup>13</sup>; Musculoskeletal<sup>13</sup>; Neurological<sup>09</sup>; Skin<sup>03, 09</sup>; Pregnancy<sup>03, 24</sup>; General and Unspecified<sup>07, 18</sup>

Cognates:

Language contact:

### ***Hydrangea* (Hydrangeaceae)**

Spanish names: Hortensia

Indigenous names:

Used by (1\*): Quichean Maya<sup>13</sup>

Used for (1#): Neurological<sup>13</sup>

Cognates:

Language contact:

### ***Hydrocotyle* (Araliaceae)**

Spanish names:

Indigenous names: Tzyokolate tane<sup>01</sup>; Makmak nab wamal<sup>20</sup>

Used by (2\*): Zoque<sup>01</sup>; Western Maya<sup>20</sup>

Used for (2#): Digestive<sup>20</sup>; Skin<sup>01</sup>

Cognates:

Language contact:

### ***Hygrophila* (Acanthaceae)**

Spanish names:

Indigenous names: Re Kanteel<sup>14</sup>

Used by (1\*): Quichean Maya<sup>14</sup>

Used for (1#): General and Unspecified<sup>14</sup>

Cognates:

Language contact:

### ***Hylocereus* (Cactaceae)**

Spanish names: Pitahaya; Pitaya

Indigenous names: Tsatsa', chacha<sup>07</sup>; Tuna rextex' juyub<sup>13</sup>; Chik'ba'l b'ak<sup>17</sup>

Used by (7\*): Huastec<sup>07</sup>; Yucatecan Maya<sup>09</sup>; Quichean Maya<sup>12, 13, 17</sup>; Nahua<sup>24, 27</sup>

Used for (11#): Digestive<sup>09, 13</sup>; Psychological<sup>12</sup>; Respiratory<sup>27</sup>; Skin<sup>07, 13</sup>; Endocrine<sup>12</sup>; Pregnancy<sup>07, 24</sup>; General and Unspecified<sup>12</sup>; nd<sup>17</sup>

Cognates:

Language contact:

### ***Hymenaea* (Fabaceae)**

Spanish names: Guapinol; Guapinole

Indigenous names: Kuy po'te<sup>02</sup>; Payi<sup>03</sup>; Ak pej<sup>04</sup>; Pakay<sup>19</sup>; Biguu<sup>21</sup>

Used by (5\*): Zoque<sup>02, 03</sup>; Mixe<sup>04</sup>; Western Maya<sup>19</sup>; Zapotec<sup>21</sup>

Used for (15#): Digestive<sup>02, 03, 04, 21</sup>; Musculoskeletal<sup>21</sup>; Respiratory<sup>03, 04, 21</sup>; Skin<sup>04</sup>; Endocrine<sup>02, 03</sup>; Urological<sup>19</sup>; Pregnancy<sup>19</sup>; Female genital<sup>19</sup>; General and Unspecified<sup>21</sup>

Cognates: MZ: po'te/payi/pej; Zoq: po'te/payi;

Language contact: MZ > Chortí

### ***Hymenocallis* (Amaryllidaceae)**

Spanish names:

Indigenous names: Lakuum<sup>07</sup>

Used by (1\*): Huastec<sup>07</sup>

Used for (1#): Skin<sup>07</sup>

Cognates:

Language contact:

### ***Hyperbaena* (Menispermaceae)**

Spanish names: Huesillo; Zapote blanco

Indigenous names: Txa cuy<sup>03</sup>

Used by (2\*): Zoque<sup>02, 03</sup>

Used for (4#): Cardiovascular<sup>02</sup>; Skin<sup>03</sup>; Endocrine<sup>02</sup>; Urological<sup>03</sup>

Cognates:

Language contact:

### ***Hypericum* (Hypericaceae)**

Spanish names: Hierba del susto, hierba de San Antonio; Hipérico; Pericón del monte

Indigenous names: HꞞxi ay<sup>03</sup>

Used by (4\*): Zoque<sup>02, 03</sup>; Quichean Maya<sup>12, 13</sup>

Used for (10#): Digestive<sup>02, 13</sup>; Neurological<sup>03</sup>; Psychological<sup>03, 12</sup>; Skin<sup>03</sup>; Pregnancy<sup>02</sup>; General and Unspecified<sup>02, 13</sup>

Cognates:

Language contact:

### ***Hypoxis* (Hypoxidaceae)**

Spanish names:

Indigenous names: Ceboll pim, Seb'oyil pim, Cewoyil pim<sup>14</sup>

Used by (1\*): Quichean Maya<sup>14</sup>

Used for (1#): Respiratory<sup>14</sup>

Cognates:

Language contact:

### ***Hyptis* (Lamiaceae)**

Spanish names: Alúcoma blanca; Balsamo de campo/ balsamito; Canelón, verbena; Cedrón; Hierba de (san) martín/verbena; Hierba de martina; Hierba de toro; Hierba martín; Hierba martina/ hoja de martina; hierba negra; Hierba San Martín; Hierba toro; La peludita; Lavanda; Menta; Miltomate; Palo de menta; Pie de tortola; San martin; Verbena

Indigenous names: Naso'o mona<sup>01</sup>; Osyi ay<sup>01</sup>; Tzitzirane/wekpa tane<sup>01</sup>; Oyo ton/wakas ay<sup>02</sup>; Tzapas pa'petkuy<sup>02</sup>; Tsutsbet cuy<sup>03</sup>; Tam juñi<sup>03</sup>; San Martin ujts<sup>04</sup>; Santalipa, sunalipaljni<sup>05</sup>; Tihtsan ts'ohool, pithomlaam ts'ohool<sup>07</sup>; Tsak maape<sup>07</sup>; Pitomlab ts'ojol<sup>08</sup>; Xta'ulum, Oregano KaX<sup>09</sup>; Chan<sup>12</sup>; Tem Kik<sup>14</sup>; Xkis Kawaay<sup>14</sup>; Chu pim<sup>15</sup>; Xtye caway<sup>16</sup>; Se' ru'j kaway<sup>17</sup>; Chu' pim<sup>17</sup>; Tsuk pimi<sup>18</sup>; Gujcu'u, guichu<sup>21</sup>; Guichu<sup>21</sup>; Guixa'a<sup>21</sup>

Used by (19\*): Zoque<sup>01, 02, 03</sup>; Mixe<sup>04</sup>; Totonac<sup>05</sup>; Huastec<sup>07, 08</sup>; Yucatecan Maya<sup>09, 11</sup>; Quichean Maya<sup>12, 14, 15, 16, 17</sup>; Western Maya<sup>18, 19</sup>; Zapotec<sup>21</sup>; Nahua<sup>25, 26</sup>

Used for (94#): Digestive<sup>01, 02, 03, 04, 07, 08, 09, 12, 18, 21, 26</sup>; Musculoskeletal<sup>01, 02, 03, 08, 14, 18, 19, 21</sup>; Neurological<sup>01, 04, 12, 18</sup>; Psychological<sup>01, 02, 11, 12, 16</sup>; Respiratory<sup>01, 02, 03, 08, 12, 14, 21</sup>; Skin<sup>01, 02, 03, 04, 07, 12, 21, 25</sup>; Endocrine<sup>01</sup>; Urological<sup>01, 02, 03, 12</sup>; Pregnancy<sup>01, 02, 03, 07, 15, 21</sup>;

Female genital<sup>01, 02, 03, 14, 15, 21, 26</sup>; General and Unspecified<sup>01, 02, 03, 05, 07, 11, 12, 14, 18, 19, 21, 25</sup>; nd<sup>17</sup>

Cognates: Hua: pitomlaC tsoCol; CoreM: chu(k) pim; Quich: chu pim;

Language contact:

### ***Ibervillea* (Cucurbitaceae)**

Spanish names:

Indigenous names: Thokob ts'een<sup>07</sup>; K'umkanul<sup>09</sup>

Used by (2\*): Huastec<sup>07</sup>; Yucatecan Maya<sup>09</sup>

Used for (3#): Musculoskeletal<sup>09</sup>; Skin<sup>07, 09</sup>

Cognates:

Language contact:

### ***Illicium* (Schisandraceae)**

Spanish names: Anís de estrella; Anís estrella; Anís estrellado, Anís chino, Bardana

Indigenous names: Ptsiidz<sup>23</sup>

Used by (8\*): Zoque<sup>01, 02</sup>; Mixe<sup>04</sup>; Yucatecan Maya<sup>09</sup>; Quichean Maya<sup>12</sup>; Zapotec<sup>21, 22, 23</sup>

Used for (12#): Digestive<sup>01, 02, 04, 09, 21, 22</sup>; Cardiovascular<sup>12</sup>; Psychological<sup>01, 12</sup>; Respiratory<sup>01</sup>; Pregnancy<sup>21</sup>; General and

Unspecified<sup>23</sup>

Cognates:

Language contact:

### ***Impatiens* (Balsaminaceae)**

Spanish names: Maravilla; Quinze añera

Indigenous names: Espiritu ujts<sup>04</sup>; China wits<sup>07</sup>

Used by (4\*): Zoque<sup>03</sup>; Mixe<sup>04</sup>; Huastec<sup>07</sup>; Quichean Maya<sup>13</sup>

Used for (8#): Eye<sup>13</sup>; Ear<sup>03</sup>; Neurological<sup>04</sup>; Respiratory<sup>03</sup>; Skin<sup>03, 13</sup>; Pregnancy<sup>07</sup>; General and Unspecified<sup>04</sup>

Cognates:

Language contact:

### ***Imperata* (Poaceae)**

Spanish names:

Indigenous names: Ataa toom, kubat toom, kulab toom<sup>07</sup>

Used by (1\*): Huastec<sup>07</sup>

Used for (3#): Digestive<sup>07</sup>; Urological<sup>07</sup>; General and Unspecified<sup>07</sup>

Cognates:

Language contact:

### ***Indigofera* (Fabaceae)**

Spanish names: Añil; Añil cimarron; Añil cimarron, hoja de tinta; Añil de Tinta

Indigenous names: Chims¥k<sup>03</sup>; Tsakam yaax, tsakam chichath, , muklaab ts'ohool, manath ts'ohool, muuw<sup>07</sup>; Initiko<sup>08</sup>;

Xoxo-ak<sup>09</sup>; Sujuxiw<sup>09</sup>

Used by (7\*): Zoque<sup>01, 03</sup>; Huastec<sup>07, 08</sup>; Yucatecan Maya<sup>09</sup>; Western Maya<sup>18</sup>; Zapotec<sup>21</sup>

Used for (22#): Blood<sup>07</sup>; Digestive<sup>03, 07, 08, 09, 18</sup>; Musculoskeletal<sup>08</sup>; Neurological<sup>07, 08, 18, 21</sup>; Respiratory<sup>03, 08, 21</sup>; Skin<sup>08, 21</sup>;

Endocrine<sup>08</sup>; Urological<sup>21</sup>; Pregnancy<sup>03</sup>; General and Unspecified<sup>01, 21</sup>

Cognates:

Language contact:

### ***Inga* (Fabaceae)**

Spanish names: Acotope, Vainilla; Carnequil; Carniquil; Chelel; Cuincuil

Indigenous names: Iki ay<sup>01</sup>; I'ki<sup>02</sup>; Inki<sup>03</sup>; Bujte<sup>18</sup>; Cahijnaquil<sup>21</sup>

Used by (5\*): Zoque<sup>01, 02, 03</sup>; Western Maya<sup>18</sup>; Zapotec<sup>21</sup>

Used for (10#): Digestive<sup>03, 18</sup>; Neurological<sup>02</sup>; Skin<sup>03</sup>; Endocrine<sup>18</sup>; Urological<sup>03</sup>; Female genital<sup>01, 03</sup>; General and

Unspecified<sup>21</sup>

Cognates: Zoq: I(n)ki;

Language contact: Zoq > Nah

### ***Iostephane* (Asteraceae)**

Spanish names: Hierba del oso

Indigenous names: Ts'ojolil an oso<sup>08</sup>

Used by (1\*): Huastec<sup>08</sup>

Used for (3#): Musculoskeletal<sup>08</sup>; Respiratory<sup>08</sup>; General and Unspecified<sup>08</sup>

Cognates:

Language contact:

### ***Ipomoea* (Convolvulaceae)**

Spanish names: Camote; Camote tahua; Chonege; Escamote; Guaco, Ipomea; Guamol; Guamol blanco/rojo; Jalapa; Manto; Pajaro bobo

Indigenous names: Nak'atang poj<sup>02</sup>; Xonege<sup>03</sup>; Nunak mooya<sup>03</sup>; Atooy aats<sup>04</sup>; Si'yu<sup>06</sup>; Huchuk<sup>07</sup>; Ith<sup>07</sup>; Thuuyu<sup>07</sup>; Ith<sup>08</sup>; Is<sup>09</sup>; Chiwohk'ax, Cancer xiw<sup>09</sup>; Paxin läq<sup>12</sup>; Is<sup>14</sup>; Xoconob<sup>14</sup>; Sayuk Q'ehen<sup>14</sup>; Nahuk Q'en<sup>14</sup>; Acum<sup>18</sup>; Guamol<sup>21</sup>; Ya banu<sup>22</sup>; Yàg-bnù, blàg-bnù, yàg-blàg-bnù<sup>23</sup>

Used by (13\*): Zoque<sup>02, 03</sup>; Mixe<sup>04</sup>; Totonac<sup>06</sup>; Huastec<sup>07, 08</sup>; Yucatecan Maya<sup>09</sup>; Quichean Maya<sup>12, 14</sup>; Western Maya<sup>18</sup>; Zapotec<sup>21, 22, 23</sup>

Used for (55#): Blood<sup>12</sup>; Digestive<sup>03, 04, 07, 08, 12, 14, 18, 21</sup>; Eye<sup>07</sup>; Ear<sup>14</sup>; Musculoskeletal<sup>08, 12, 18, 21</sup>; Neurological<sup>07, 14, 22, 23</sup>; Psychological<sup>12</sup>; Respiratory<sup>22</sup>; Skin<sup>02, 03, 04, 07, 09, 12, 21, 22</sup>; Urological<sup>14</sup>; Pregnancy<sup>06, 07, 14, 18</sup>; General and Unspecified<sup>03, 04, 07, 09, 14, 21, 22, 23</sup>

Cognates: Zoq: nak; Maya: ith/is; Hua: ith; Zap: b(a)nu;

Language contact: Tot > Kekchí

### ***Iresine* (Amaranthaceae)**

Spanish names: Tlan cuaya

Indigenous names: Tsus tunuk koso<sup>03</sup>; Paloma jomol<sup>20</sup>; Zhwĩs, guĩzh guìe nquĩts, guìe-mĩdz<sup>23</sup>; Tlancuaya<sup>26</sup>

Used by (4\*): Zoque<sup>03</sup>; Western Maya<sup>20</sup>; Zapotec<sup>23</sup>; Nahua<sup>26</sup>

Used for (12#): Blood<sup>03</sup>; Digestive<sup>20, 23, 26</sup>; Musculoskeletal<sup>03</sup>; Psychological<sup>23</sup>; Skin<sup>03, 26</sup>; General and Unspecified<sup>03, 23, 26</sup>

Cognates:

Language contact:

### ***Isocarpha* (Asteraceae)**

Spanish names: Oreja de conejo, hierba de conejo

Indigenous names: U chikin t'ur<sup>19</sup>

Used by (1\*): Western Maya<sup>19</sup>

Used for (1#): Digestive<sup>19</sup>

Cognates:

Language contact:

### ***Isochilus* (Orchidaceae)**

Spanish names:

Indigenous names: Toom<sup>07</sup>

Used by (1\*): Huastec<sup>07</sup>

Used for (1#): General and Unspecified<sup>07</sup>

Cognates:

Language contact:

### ***Jacaranda* (Bignoniaceae)**

Spanish names: Jacaranda

Indigenous names: Q'ojom che<sup>13</sup>; Yàg-jàcàràn<sup>23</sup>

Used by (3\*): Quichean Maya<sup>12, 13</sup>; Zapotec<sup>23</sup>

Used for (5#): Digestive<sup>12, 13, 23</sup>; Psychological<sup>12</sup>; General and Unspecified<sup>12</sup>

Cognates:

Language contact:

### ***Jasminum* (Oleaceae)**

Spanish names: Jazmín

Indigenous names: Hasmiin<sup>07</sup>

Used by (2\*): Zoque<sup>02</sup>; Huastec<sup>07</sup>

Used for (3#): Respiratory<sup>02, 07</sup>; General and Unspecified<sup>07</sup>

Cognates:

Language contact:

### ***Jatropha* (Euphorbiaceae)**

Spanish names: Mala mujer/toloache; Ortiga; Piñon; Piñon, botja; Piñoncillo; Sangre de drago; Suzi

Indigenous names: Ekis<sup>02</sup>; Tzis kà wang<sup>02</sup>; Cuyukum<sup>03</sup>; Kutsøkee<sup>04</sup>; Chuta<sup>05</sup>; Čuta<sup>05</sup>; Chut'a<sup>06</sup>; Thakpeen te', piiloch<sup>07</sup>; Cruz ojo xiw<sup>09</sup>; Siklite<sup>09</sup>; Pomolche<sup>09</sup>; Làal<sup>10</sup>; Sakirte<sup>19</sup>; Yàg-pcuà<sup>23</sup>

Used by (18\*): Zoque<sup>01, 02, 03</sup>; Mixe<sup>04</sup>; Totonac<sup>05, 06</sup>; Huastec<sup>07</sup>; Yucatecan Maya<sup>09, 10, 11</sup>; Quichean Maya<sup>12, 13</sup>; Western Maya<sup>19</sup>; Zapotec<sup>21, 22, 23</sup>; Nahua<sup>25, 27</sup>

Used for (43#): Blood<sup>07</sup>; Digestive<sup>01, 02, 03, 05, 06, 07, 09, 22</sup>; Ear<sup>10</sup>; Musculoskeletal<sup>10, 11, 13</sup>; Neurological<sup>02, 10, 19, 27</sup>; Respiratory<sup>05</sup>; Skin<sup>02, 03, 04, 05, 06, 07, 09, 11, 12, 19, 21, 22, 23, 25, 27</sup>; Pregnancy<sup>22</sup>; Female genital<sup>03</sup>; General and Unspecified<sup>02, 12, 19, 21, 22</sup>

Cognates: Tot: chuta; CoreM: siklite / sakirte;

Language contact: Tot <> Highland Popoluca <> Mixe

### ***Juglans* (Juglandaceae)**

Spanish names: Nogal

Indigenous names: Mak xu 'xut qui 'hui<sup>06</sup>

Used by (4\*): Zoque<sup>03</sup>; Totonac<sup>06</sup>; Quichean Maya<sup>12</sup>; Nahua<sup>26</sup>

Used for (11#): Blood<sup>12</sup>; Digestive<sup>06, 12</sup>; Musculoskeletal<sup>12</sup>; Psychological<sup>26</sup>; Respiratory<sup>12</sup>; Skin<sup>06</sup>; Endocrine<sup>12</sup>; Urological<sup>26</sup>; Pregnancy<sup>03</sup>; General and Unspecified<sup>12</sup>

Cognates:

Language contact:

### ***Juniperus* (Cupressaceae)**

Spanish names: Cedro; Sabino, ahuehuete

Indigenous names: Yàg-guizdòo, yàg-guistòo<sup>23</sup>

Used by (2\*): Zapotec<sup>23</sup>; Nahua<sup>25</sup>

Used for (3#): Neurological<sup>25</sup>; Skin<sup>23</sup>; General and Unspecified<sup>25</sup>

Cognates:

Language contact:

### ***Justicia* (Acanthaceae)**

Spanish names: Añil/tinta chiapaneca/ hoja de tinta, Ciencodo/codito ; Camarón; Camarón de Montaña; Flor de tila, tilo; Hierba azul; Hierba del santuario; Hoje de tinta, añil; Mohuite; Moitle, muicle; Muicle; Muitle; Pote de la tiñadora, Añil; Pote verde; Rompe piedra; Tinta; Trébol; Yolixpa

Indigenous names: Tzàmi tane/tzitz<sup>01</sup>; Tutxti ay<sup>03</sup>; Majei chich<sup>03</sup>; Chich<sup>03</sup>; Limanin<sup>05</sup>; Tsaakuy elul, xonol palats, nonool t'ot, witssil a eheenchix, ok t'ot, tsakam payab wits, uxkwe' ts'ohool, eheenchix wits, wots paya', bohool ch'ohool<sup>07</sup>; Pithomlaab ts'ohool<sup>07</sup>; Tsaakuy elul, xonol palats<sup>07</sup>; Muu, muuw<sup>07</sup>; Muu<sup>08</sup>; Lumbresil pim<sup>14</sup>; Ixwaq<sup>14</sup>; Rax Pim<sup>15</sup>; Numay Pim<sup>15</sup>; Xna kejen<sup>16</sup>; Saxjolom chacmut<sup>16</sup>; K'xuy i kok, Santa Maria kejen<sup>16</sup>; Santa Maria k'ejen<sup>17</sup>; Sa'x jolom chacmut<sup>17</sup>; U nich tila<sup>18</sup>; T'oxe ji'tn<sup>18</sup>; Mohuitl<sup>25</sup>; Muictli<sup>28</sup>

Used by (17\*): Zoque<sup>01, 03</sup>; Totonac<sup>05, 06</sup>; Huastec<sup>07, 08</sup>; Quichean Maya<sup>12, 14, 15, 16, 17</sup>; Western Maya<sup>18, 19</sup>; Zapotec<sup>21</sup>; Nahua<sup>25, 26, 28</sup>

Used for (82#): Blood<sup>06, 08</sup>; Digestive<sup>01, 03, 06, 07, 14, 25, 26</sup>; Ear<sup>18</sup>; Cardiovascular<sup>03, 08, 25</sup>; Musculoskeletal<sup>25</sup>; Neurological<sup>03, 07, 16, 19, 21, 25</sup>; Psychological<sup>03, 07, 08, 15, 16, 18, 25</sup>; Respiratory<sup>01, 07, 18, 25, 26</sup>; Skin<sup>03, 07, 08, 12, 25, 26, 28</sup>; Endocrine<sup>08, 12, 18</sup>; Urological<sup>01, 18</sup>;

Pregnancy<sup>01, 07, 15</sup>; Female genital<sup>03, 05, 07, 15</sup>; General and Unspecified<sup>01, 03, 05, 06, 07, 08, 14, 15, 18, 19, 21, 25, 26, 28</sup>; nd<sup>17</sup>

Cognates: Zoq: tzitz / chich; Hua: muu; Nah: muictli;

Language contact: Hua <> Quich <> Nah

### ***Kalanchoe* (Crassulaceae)**

Spanish names: Beladona (macho); Beladonna; Beladonna gigante, mala madre; Belladona; Hüipil de monte; Maravilla real; sanalotodo/curalotodo/lengua de vecino

Indigenous names: Majei maravilla<sup>03</sup>; Pooti'l qehen<sup>14</sup>

Used by (6\*): Zoque<sup>01, 02, 03</sup>; Yucatecan Maya<sup>09</sup>; Quichean Maya<sup>14</sup>; Western Maya<sup>18</sup>

Used for (24#): Digestive<sup>01, 03, 18</sup>; Eye<sup>03, 14</sup>; Ear<sup>03</sup>; Musculoskeletal<sup>02, 09, 14, 18</sup>; Neurological<sup>02</sup>; Respiratory<sup>18</sup>; Skin<sup>01, 03, 09, 18</sup>; Urological<sup>01</sup>; Female genital<sup>01</sup>; General and Unspecified<sup>01, 02, 03</sup>

Cognates:

Language contact:

### ***Kallstroemia* (Zygophyllaceae)**

Spanish names: Campanilla/hoja de azar

Indigenous names: Tza'a tzoj<sup>01</sup>

Used by (1\*): Zoque<sup>01</sup>

Used for (1#): General and Unspecified<sup>01</sup>

Cognates:

Language contact:

### ***Karwinskia* (Rhamnaceae)**

Spanish names: Guiiguiste

Indigenous names: Ixim te'<sup>19</sup>

Used by (1\*): Western Maya<sup>19</sup>

Used for (1#): Skin<sup>19</sup>

Cognates:

Language contact:

### ***Kearnemalvastrum* (Malvaceae)**

Spanish names: Malva real, Malvavisca

Indigenous names: Malma, Malva Aq'om<sup>12</sup>

Used by (1\*): Quichean Maya<sup>12</sup>

Used for (5#): Blood<sup>12</sup>; Cardiovascular<sup>12</sup>; Psychological<sup>12</sup>; Skin<sup>12</sup>; General and Unspecified<sup>12</sup>

Cognates:

Language contact:

### ***Kionophyton* (Orchidaceae)**

Spanish names:

Indigenous names: Kw'itool ts'ohool, k'ok'om it'ath ts'ohool<sup>07</sup>

Used by (1\*): Huastec<sup>07</sup>

Used for (1#): Pregnancy<sup>07</sup>

Cognates:

Language contact:

### ***Koanophyllon* (Asteraceae)**

Spanish names: Hoja vishe

Indigenous names: Z'ay ay<sup>03</sup>; Øgøin aay<sup>04</sup>; Tok'te', yaxal<sup>07</sup>

Used by (4\*): Zoque<sup>02, 03</sup>; Mixe<sup>04</sup>; Huastec<sup>07</sup>

Used for (10#): Digestive<sup>07</sup>; Musculoskeletal<sup>07</sup>; Neurological<sup>07</sup>; Psychological<sup>02</sup>; Respiratory<sup>07</sup>; Skin<sup>03</sup>; General and Unspecified<sup>02, 03, 04, 07</sup>

Cognates:

Language contact:

### ***Kohleria* (Gesneriaceae)**

Spanish names: Planta capulina

Indigenous names:

Used by (1\*): Zoque<sup>03</sup>

Used for (1#): Skin<sup>03</sup>

Cognates:

Language contact:

### ***Kosteletzkya* (Malvaceae)**

Spanish names:

Indigenous names: Bisil, Xcampana ka'ax<sup>09</sup>

Used by (1\*): Yucatecan Maya<sup>09</sup>

Used for (1#): Digestive<sup>09</sup>

Cognates:

Language contact:

### ***Krameria* (Krameriaceae)**

Spanish names: Romerito, hoja de disenteria

Indigenous names: Luu guiatzimbeer<sup>21</sup>

Used by (1\*): Zapotec<sup>21</sup>

Used for (3#): Digestive<sup>21</sup>; Pregnancy<sup>21</sup>; Female genital<sup>21</sup>

Cognates:

Language contact:

### ***Krugiodendron* (Rhamnaceae)**

Spanish names:

Indigenous names: Chintok<sup>109</sup>

Used by (1\*): Yucatecan Maya<sup>09</sup>

Used for (2#): Neurological<sup>09</sup>; Urological<sup>09</sup>

Cognates:

Language contact:

### ***Kyllinga* . (Cyperaceae)**

Spanish names:

Indigenous names: Xmach tz'i' Q'ehen<sup>14</sup>

Used by (1\*): Quichean Maya<sup>14</sup>

Used for (1#): Endocrine<sup>14</sup>

Cognates:

Language contact:

### ***Lactuca* (Asteraceae)**

Spanish names: Lechuga

Indigenous names:

Used by (3\*): Zoque<sup>02</sup>; Totonac<sup>06</sup>; Quichean Maya<sup>13</sup>

Used for (4#): Psychological<sup>06</sup>; Endocrine<sup>02</sup>; Pregnancy<sup>13</sup>; Female genital<sup>13</sup>

Cognates:

Language contact:

### ***Laetia* (Salicaceae)**

Spanish names: Corrimiento

Indigenous names:

Used by (1\*): Yucatecan Maya<sup>11</sup>

Used for (1#): General and Unspecified<sup>11</sup>

Cognates:

Language contact:

### ***Lagascea* (Asteraceae)**

Spanish names:

Indigenous names: Papan te<sup>20</sup>

Used by (1\*): Western Maya<sup>20</sup>

Used for (1#): Digestive<sup>20</sup>

Cognates:

Language contact:

### ***Lagenaria* (Cucurbitaceae)**

Spanish names: Chical pestle, pumpo, lipo; Tecomate

Indigenous names: Pok<sup>03</sup>; Xomom, kweentu<sup>07</sup>; Lek<sup>09</sup>; Lobej' quiasj'ga, beeju'u<sup>21</sup>

Used by (4\*): Zoque<sup>03</sup>; Huastec<sup>07</sup>; Yucatecan Maya<sup>09</sup>; Zapotec<sup>21</sup>

Used for (8#): Digestive<sup>03, 21</sup>; Musculoskeletal<sup>09</sup>; Psychological<sup>03</sup>; Respiratory<sup>07, 21</sup>; Urological<sup>07</sup>; General and Unspecified<sup>21</sup>

Cognates:

Language contact:

### ***Lamourouxia* (Orobanchaceae)**

Spanish names:

Indigenous names: Guièe-dzǐng, guizh-dzǐng<sup>23</sup>

Used by (1\*): Zapotec<sup>23</sup>

Used for (2#): Skin<sup>23</sup>; General and Unspecified<sup>23</sup>

Cognates:

Language contact:

### ***Lantana* (Verbenaceae)**

Spanish names: Cinco negritos; Cinco negritos (blanco); Cinco negritos, salvia de monte, salvia silvestre, oregano; Conchita/conchinita/conchulita/chubaroba/chibaloba/hoja de conchudo; Flor de sangre; Ojo de pescado, orozuz; Orozuz; Riñonina; Salvareal/riñosan; Sapotilla; Siete Negritos; Té de monte

Indigenous names: Pajk jäyã<sup>01</sup>; Pak jäyã<sup>01</sup>; Kan'muk<sup>03</sup>; Tøøts kumot<sup>04</sup>; Škaštajat štuki<sup>05</sup>; X'laca stap'u squii'ti<sup>06</sup>; Thak patelx, patel mantelx, kanil bakan, thak otoomal<sup>07</sup>; Tsak patelax, witsiim i thayemlaab, tsakam maap, tsakam otoomal, wal thancha', pahatix wits<sup>07</sup>; Baron<sup>07</sup>; Roq' Chiwan<sup>12</sup>; Ruwi amaj, corcoch, cor choch, utucán cumatz<sup>13</sup>; Saq'i Tulux<sup>14</sup>; Xkot' Kaway<sup>14</sup>; Tulux Q'eheh<sup>14</sup>; Tulush pim<sup>17</sup>; Ch'ilvet, ch'ili wet, ch'ilch'il wajch<sup>20</sup>; Guxa'a riene'e<sup>21</sup>; Žob leh<sup>22</sup>

Used by (17\*): Zoque<sup>01, 02, 03</sup>; Mixe<sup>04</sup>; Totonac<sup>05, 06</sup>; Huastec<sup>07</sup>; Yucatecan Maya<sup>09</sup>; Quichean Maya<sup>12, 13, 14, 17</sup>; Western Maya<sup>19, 20</sup>; Zapotec<sup>21, 22</sup>; Nahua<sup>26</sup>

Used for (82#): Digestive<sup>01, 02, 03, 06, 07, 09, 12, 13, 14, 20, 21, 22</sup>; Cardiovascular<sup>12, 13</sup>; Musculoskeletal<sup>07, 12, 13</sup>; Neurological<sup>03, 04, 06, 07, 12, 13, 14</sup>; Psychological<sup>03</sup>; Respiratory<sup>01, 03, 05, 06, 13, 14, 20, 26</sup>; Skin<sup>03, 07, 12, 13, 21</sup>; Endocrine<sup>07, 14</sup>; Urological<sup>01, 07, 12, 20</sup>; Pregnancy<sup>01, 03, 07, 19, 20</sup>; Female genital<sup>01, 12, 13, 19</sup>; Male genital<sup>12</sup>; General and Unspecified<sup>02, 06, 07, 12, 13, 14, 20, 26</sup>; nd<sup>17</sup>

Cognates: CoreM: chiwan; Quich: tulux;

Language contact: Chiapas Zoq <> Hua <> Tot

### ***Laportea* (Urticaceae)**

Spanish names: Ortiga

Indigenous names: L'aa<sup>10</sup>

Used by (1\*): Yucatecan Maya<sup>10</sup>

Used for (3#): Ear<sup>10</sup>; Musculoskeletal<sup>10</sup>; Neurological<sup>10</sup>

Cognates:

Language contact:



### ***Larrea* (Zygophyllaceae)**

Spanish names: Gobernadora

Indigenous names:

Used by (1\*): Zapotec<sup>21</sup>

Used for (1#): Digestive<sup>21</sup>

Cognates:

Language contact:

### ***Lasiacis* (Poaceae)**

Spanish names: Carisso; Carizo

Indigenous names: Am ay<sup>02</sup>; Kꞥkujuki ay<sup>03</sup>; Tseey kw'a', thimallon pakaab<sup>07</sup>; Siit<sup>09</sup>; Guìzh-gòob-guì, guìzh-gòob<sup>23</sup>

Used by (5\*): Zoque<sup>02, 03</sup>; Huastec<sup>07</sup>; Yucatecan Maya<sup>09</sup>; Zapotec<sup>23</sup>

Used for (9#): Digestive<sup>07</sup>; Musculoskeletal<sup>07</sup>; Skin<sup>03, 09</sup>; Urological<sup>02, 07</sup>; General and Unspecified<sup>07, 23</sup>

Cognates:

Language contact:

### ***Lasianthaea* (Asteraceae)**

Spanish names:

Indigenous names: Q'aham tzej<sup>14</sup>

Used by (1\*): Quichean Maya<sup>14</sup>

Used for (1#): General and Unspecified<sup>14</sup>

Cognates:

Language contact:

### ***Laurus* (Lauraceae)**

Spanish names: Laurel

Indigenous names:

Used by (1\*): Zoque<sup>03</sup>

Used for (1#): General and Unspecified<sup>03</sup>

Cognates:

Language contact:

### ***Lavandula* (Lamiaceae)**

Spanish names: Alucema

Indigenous names:

Used by (3\*): Zoque<sup>01, 02</sup>; Western Maya<sup>19</sup>

Used for (12#): Blood<sup>19</sup>; Digestive<sup>01, 02</sup>; Musculoskeletal<sup>02</sup>; Respiratory<sup>01, 02</sup>; Pregnancy<sup>01, 02, 19</sup>; Female genital<sup>01, 02</sup>; General and Unspecified<sup>01</sup>

Cognates:

Language contact:

### ***Lawsonia* (Lythraceae)**

Spanish names: Rosedad

Indigenous names: Rosedad<sup>04</sup>

Used by (2\*): Mixe<sup>04</sup>; Zapotec<sup>21</sup>

Used for (2#): Skin<sup>04</sup>; General and Unspecified<sup>21</sup>

Cognates:

Language contact:

### ***Leonotis* (Lamiaceae)**

Spanish names: Hierba del burro

Indigenous names:

Used by (2\*): Yucatecan Maya<sup>09</sup>; Nahua<sup>26</sup>

Used for (2#): Digestive<sup>26</sup>; Neurological<sup>09</sup>

Cognates:

Language contact:

### ***Leonurus* (Lamiaceae)**

Spanish names: Mariguana simarron/ Chiquisa; Marihuanilla

Indigenous names:

Used by (3\*): Zoque<sup>01, 03</sup>; Mixe<sup>04</sup>

Used for (6#): Digestive<sup>03</sup>; Musculoskeletal<sup>01, 03</sup>; Skin<sup>01, 03</sup>; Female genital<sup>04</sup>

Cognates:

Language contact:

### ***Lepechinia* (Lamiaceae)**

Spanish names: Bretónica; Brétonica, hierba del sapo, chucharilla; Bretonica, hierba tónica, arnica

Indigenous names: Qaj tajik q'ox<sup>12</sup>; Upek'tzi<sup>13</sup>; Cha vitz<sup>13</sup>; Tzotzil vomol, yaxal vomol, na p'ilix, chilchil tz'i'lel, poxil a'ch'ut<sup>20</sup>

Used by (4\*): Quichean Maya<sup>12, 13</sup>; Western Maya<sup>20</sup>; Nahua<sup>25</sup>

Used for (16#): Digestive<sup>13, 20</sup>; Cardiovascular<sup>25</sup>; Musculoskeletal<sup>12, 13</sup>; Neurological<sup>20</sup>; Psychological<sup>13</sup>; Respiratory<sup>20, 25</sup>; Skin<sup>13</sup>; Endocrine<sup>25</sup>; General and Unspecified<sup>12, 13, 20</sup>

Cognates:

Language contact:

### ***Lepidaploa* (Asteraceae)**

Spanish names:

Indigenous names: Sotopok tsay<sup>03</sup>; Semem Q'ehen<sup>14</sup>

Used by (2\*): Zoque<sup>03</sup>; Quichean Maya<sup>14</sup>

Used for (5#): Digestive<sup>03</sup>; Respiratory<sup>03</sup>; Skin<sup>03</sup>; General and Unspecified<sup>03, 14</sup>

Cognates:

Language contact:

### ***Lepidium* (Brassicaceae)**

Spanish names: Altanisa; Hierba de pollo; Jilipliege, antemelia; Jilipliege, Mostaza; Maltuerce; Mermejita, estrella hembra; Pañalita; Pierna vieja

Indigenous names: Ma'tza yomo<sup>01</sup>; Tsakam utsun, utsun ts'ohool<sup>07</sup>; Rakän aqwäl, Saqil Kayis, Mesebäl Q'os Paxk'u'y<sup>12</sup>;

Siquil be', skil q'ayes, ik q'ayes, masb'al uxekej<sup>13</sup>; Pich t'uluk, pich' tz'i lel, sakil jomol, sak nich wamal, kajk'an wamal, anix te' wamal<sup>20</sup>; Pich t'uluk. Sakil jomol, sak nich wamal, kajk'an wamal, anix te' wamal<sup>20</sup>; Guish inguedi<sup>21</sup>; Siak<sup>22</sup>

Used by (10\*): Zoque<sup>01</sup>; Huastec<sup>07</sup>; Yucatecan Maya<sup>11</sup>; Quichean Maya<sup>12, 13</sup>; Western Maya<sup>19, 20</sup>; Zapotec<sup>21, 22</sup>; Nahua<sup>26</sup>

Used for (28#): Digestive<sup>01, 07, 12, 13, 19, 20</sup>; Ear<sup>13</sup>; Musculoskeletal<sup>12</sup>; Neurological<sup>12, 13</sup>; Psychological<sup>12, 13</sup>; Respiratory<sup>12, 13, 26</sup>; Skin<sup>11, 12, 20, 21, 22</sup>; Endocrine<sup>12</sup>; Urological<sup>13</sup>; Pregnancy<sup>20</sup>; Female genital<sup>11, 12, 21</sup>; General and Unspecified<sup>12, 26</sup>

Cognates: CoreM: sakil; Quich: s(a)kil kayis, mesbel;

Language contact: Chiapas Zoq <> Hua

### ***Lessingianthus* (Asteraceae)**

Spanish names:

Indigenous names: Semem<sup>14</sup>

Used by (1\*): Quichean Maya<sup>14</sup>

Used for (1#): Digestive<sup>14</sup>

Cognates:

Language contact:

### ***Leucaena* (Fabaceae)**

Spanish names: Guaje; Guaxi; Huaje blanco; Huaje de la peña/ de agua; Huaje/Huash; Timbre

Indigenous names: Pakapaka<sup>01</sup>; Li'li'ka, guamuxi<sup>06</sup>; Thuk<sup>07</sup>; Waxim<sup>09</sup>; Laj<sup>21</sup>; Laj' tza gutzii<sup>21</sup>; Lya<sup>22</sup>; Yàg-nlàbâd, yàg-nlibâd, yàg-nlázhò, yàg-nlízhò<sup>23</sup>

Used by (8\*): Zoque<sup>01</sup>; Totonac<sup>06</sup>; Huastec<sup>07</sup>; Yucatecan Maya<sup>09</sup>; Zapotec<sup>21, 22, 23</sup>; Nahuatl<sup>26</sup>

Used for (14#): Digestive<sup>01, 06, 21, 22, 23, 26</sup>; Skin<sup>09, 23</sup>; General and Unspecified<sup>01, 07, 21</sup>

Cognates: Zap: laj/lja/lazh;

Language contact: Zap > Tot

### ***Leucanthemum* (Asteraceae)**

Spanish names: Margarita comun

Indigenous names:

Used by (1\*): Quichean Maya<sup>12</sup>

Used for (3#): Respiratory<sup>12</sup>; Skin<sup>12</sup>; General and Unspecified<sup>12</sup>

Cognates:

Language contact:

### ***Liabum* (Asteraceae)**

Spanish names:

Indigenous names: Saq sa'ab<sup>16</sup>

Used by (1\*): Quichean Maya<sup>16</sup>

Used for (2#): Neurological<sup>16</sup>; Psychological<sup>16</sup>

Cognates:

Language contact:

### ***Licania* (Chrysobalanaceae)**

Spanish names: Mezon zapote; Zapote cabello; Zunso

Indigenous names: A'kchi xi't jaaca<sup>06</sup>; Moxpim, Jol'bob<sup>14</sup>; Jor b'oj<sup>19</sup>; Yàg-guieł-bêdz<sup>23</sup>

Used by (4\*): Totonac<sup>06</sup>; Quichean Maya<sup>14</sup>; Western Maya<sup>19</sup>; Zapotec<sup>23</sup>

Used for (6#): Digestive<sup>06, 14, 19</sup>; Skin<sup>23</sup>; Pregnancy<sup>23</sup>; General and Unspecified<sup>06</sup>

Cognates: CoreM: jol'bob/jorb'oj;

Language contact:

### ***Licaria* (Lauraceae)**

Spanish names: Laurel amarillo; Laurel Negro

Indigenous names: Yʼk moko<sup>03</sup>; Puutx moko<sup>03</sup>

Used by (1\*): Zoque<sup>03</sup>

Used for (6#): Digestive<sup>03</sup>; Cardiovascular<sup>03</sup>; Skin<sup>03</sup>; Female genital<sup>03</sup>

Cognates:

Language contact:

### ***Ligustrum* (Oleaceae)**

Spanish names: Arrayana; Trueno

Indigenous names: Yàg-truên<sup>23</sup>

Used by (3\*): Zoque<sup>01</sup>; Quichean Maya<sup>13</sup>; Zapotec<sup>23</sup>

Used for (3#): Digestive<sup>01</sup>; Skin<sup>13</sup>; General and Unspecified<sup>23</sup>

Cognates:

Language contact:

### ***Linum* (Linaceae)**

Spanish names: Linaza

Indigenous names:

Used by (4\*): Zoque<sup>01, 02</sup>; Quichean Maya<sup>12, 13</sup>

Used for (10#): Digestive<sup>01, 12, 13</sup>; Neurological<sup>12</sup>; Respiratory<sup>01</sup>; Skin<sup>12</sup>; Urological<sup>01, 12</sup>; General and Unspecified<sup>02, 12</sup>

Cognates:

Language contact:

### ***Lippia* (Verbenaceae)**

Spanish names: Malvareal/salvareal/malva de castilla/hierbabuena; Oregano; Orégano ; Oregano silvestre/ de campo; Palo de gusano; Pitiona; Salvareal; Salvia amarilla; Salvia de castilla; Salvia real, malva real; Salvia Santa; Salvia Sija; Salvia sija, salvia santa, salvia morada, juanilana; Sorosir; Tapón; Te de china/orozus; Té de la abuela; Té de limón

Indigenous names: Anaamte', thak te'<sup>07</sup>; Loq'oläj Chol Q'os<sup>12</sup>; Salv' sant', uwi juyub q'ayes<sup>13</sup>; Tulux Q'ehen<sup>14</sup>; Q'iiil pim<sup>14</sup>; Tu'lush pim<sup>16</sup>; Alba noxi'na<sup>18</sup>; Pisis nich vomol<sup>20</sup>; Yagangucha'a<sup>21</sup>; Salb gohts<sup>22</sup>; Tapontizana<sup>26</sup>

Used by (18\*): Zoque<sup>01, 02, 03</sup>; Mixe<sup>04</sup>; Huastec<sup>07</sup>; Yucatecan Maya<sup>09</sup>; Quichean Maya<sup>12, 13, 14, 16</sup>; Western Maya<sup>18, 19, 20</sup>; Zapotec<sup>21, 22</sup>; Nahua<sup>26, 27, 28</sup>

Used for (60#): Blood<sup>12</sup>; Digestive<sup>02, 03, 04, 07, 09, 12, 13, 18, 19, 20, 21, 22, 26, 27, 28</sup>; Cardiovascular<sup>12</sup>; Musculoskeletal<sup>02, 03, 12, 13</sup>; Neurological<sup>12, 16, 22</sup>; Psychological<sup>01, 13</sup>; Respiratory<sup>01, 03, 12, 13, 14, 27</sup>; Skin<sup>07, 09, 26</sup>; Urological<sup>07</sup>; Pregnancy<sup>02, 04, 09, 13, 19, 21, 27</sup>; Female genital<sup>02, 03, 13, 19, 28</sup>; Male genital<sup>02</sup>; General and Unspecified<sup>03, 12, 13, 21, 22</sup>

Cognates: Quich: tulux;

Language contact:

### ***Liquidambar* (Altingiaceae)**

Spanish names: Liquidambar; Ocosote; Ocozote; Suchiate

Indigenous names: Täsy kuy<sup>01</sup>; Tʼx cuy<sup>03</sup>; So'te<sup>20</sup>; Bijtu'u<sup>21</sup>; Suchiate<sup>25</sup>; Ocosotito<sup>26</sup>

Used by (7\*): Zoque<sup>01, 03</sup>; Quichean Maya<sup>13</sup>; Western Maya<sup>20</sup>; Zapotec<sup>21</sup>; Nahua<sup>25, 26</sup>

Used for (16#): Digestive<sup>01, 20, 21, 25</sup>; Musculoskeletal<sup>01, 13</sup>; Neurological<sup>01</sup>; Skin<sup>03, 13, 25</sup>; Pregnancy<sup>01</sup>; Female genital<sup>01</sup>; General and Unspecified<sup>01, 13, 21, 26</sup>

Cognates: Zoq: täx kuy;

Language contact: Nah <> Tzeltalan

### ***Lithachne* (Poaceae)**

Spanish names:

Indigenous names: Tsakam pakaab, tsakam tsahib, tsakam tseey kw'a', tsakam toom, pakaabil i kw'a'<sup>07</sup>

Used by (1\*): Huastec<sup>07</sup>

Used for (2#): Neurological<sup>07</sup>; Pregnancy<sup>07</sup>

Cognates:

Language contact:

### ***Lithospermum* (Boraginaceae)**

Spanish names: Mitamorial; Té Moreal

Indigenous names:

Used by (2\*): Quichean Maya<sup>12, 13</sup>

Used for (3#): Digestive<sup>12</sup>; Respiratory<sup>12</sup>; Female genital<sup>13</sup>

Cognates:

Language contact:

### ***Litsea* (Lauraceae)**

Spanish names: Laurel

Indigenous names: Toka tzajtza/toka tzasa/toka' ay<sup>01</sup>; Lawreel<sup>07</sup>; Ts'uj<sup>08</sup>; Roj Xwan<sup>12</sup>; Tziltzil ujch', tzi uch<sup>20</sup>; Guib diitz<sup>21</sup>

Used by (10\*): Zoque<sup>01, 02</sup>; Totonac<sup>06</sup>; Huastec<sup>07, 08</sup>; Quichean Maya<sup>12</sup>; Western Maya<sup>20</sup>; Zapotec<sup>21, 22, 23</sup>

Used for (31#): Digestive<sup>01, 02, 06, 08, 12, 20, 21</sup>; Eye<sup>21</sup>; Cardiovascular<sup>12</sup>; Musculoskeletal<sup>01, 08</sup>; Neurological<sup>06, 08</sup>; Psychological<sup>06, 08, 12</sup>; Respiratory<sup>06</sup>; Endocrine<sup>08</sup>; Pregnancy<sup>01, 21, 22, 23</sup>; Female genital<sup>01, 02</sup>; General and Unspecified<sup>01, 06, 07, 08, 12, 21, 23</sup>

Cognates:

Language contact: Chiapas Zoq <> Hua <> Tzeltalan <> Zap

### ***Lobelia* (Campanulaceae)**

Spanish names: Hierba de Conejo, Mejorana Morada de Agua, Chilio; Hierba de la enferma, flor de chupa

Indigenous names: Sal' Keq Aq'om K'ik<sup>12</sup>; Tzajal nich wamal, paj nich te', turesna wamal, prima najk, pameyat<sup>20</sup>; Guizh-sàntàmàr<sup>23</sup>; Guizh-guìè-dzǐng, guìè-dán, guìè-měets, guìè-nàrânj<sup>23</sup>; Otpacxihuitl<sup>26</sup>

Used by (4\*): Quichean Maya<sup>12</sup>; Western Maya<sup>20</sup>; Zapotec<sup>23</sup>; Nahua<sup>26</sup>

Used for (11#): Digestive<sup>20</sup>; Cardiovascular<sup>12</sup>; Musculoskeletal<sup>12, 20</sup>; Psychological<sup>12</sup>; Respiratory<sup>23</sup>; Skin<sup>23, 26</sup>; Pregnancy<sup>20</sup>; Female genital<sup>20</sup>; General and Unspecified<sup>23</sup>

Cognates:

Language contact:

### ***Loeselia* (Polemoniaceae)**

Spanish names: Espinosilla; Espinosillo; Espinosillo, yerba de espanto; Espinozillo; Jaboncillo, espinozillo de cerro

Indigenous names: Škwan jehb<sup>22</sup>; Škwan jehb las<sup>22</sup>; Spinòs<sup>23</sup>; Huitzitziquitl<sup>28</sup>

Used by (5\*): Zoque<sup>02</sup>; Zapotec<sup>21, 22, 23</sup>; Nahua<sup>28</sup>

Used for (20#): Digestive<sup>21, 22, 23</sup>; Neurological<sup>23</sup>; Respiratory<sup>23, 28</sup>; Skin<sup>21, 23</sup>; Urological<sup>22, 23</sup>; Pregnancy<sup>22</sup>; Female genital<sup>21</sup>; General and Unspecified<sup>02, 21, 22, 23, 28</sup>

Cognates:

Language contact:

### ***Lonchocarpus* (Fabaceae)**

Spanish names:

Indigenous names: Xuul<sup>09</sup>; Balche<sup>09</sup>

Used by (1\*): Yucatecan Maya<sup>09</sup>

Used for (5#): Musculoskeletal<sup>09</sup>; Neurological<sup>09</sup>; Respiratory<sup>09</sup>; General and Unspecified<sup>09</sup>

Cognates:

Language contact:

### ***Lopezia* (Onagraceae)**

Spanish names: Hierba de la araña

Indigenous names: Xalu vomol<sup>20</sup>

Used by (2\*): Western Maya<sup>20</sup>; Nahua<sup>26</sup>

Used for (3#): Digestive<sup>20</sup>; Musculoskeletal<sup>26</sup>; Skin<sup>26</sup>

Cognates:

Language contact:

### ***Lophosoria* (Dicksoniaceae)**

Spanish names: Zarzaparilla

Indigenous names:

Used by (1\*): Nahua<sup>25</sup>

Used for (1#): Urological<sup>25</sup>

Cognates:

Language contact:

### ***Louteridium* (Acanthaceae)**

Spanish names:

Indigenous names: Ojoj<sup>14</sup>

Used by (1\*): Quichean Maya<sup>14</sup>

Used for (2#): Digestive<sup>14</sup>; General and Unspecified<sup>14</sup>

Cognates:

Language contact:

### ***Loxothysanus* (Asteraceae)**

Spanish names:

Indigenous names: Wꞥyꞥ ay<sup>03</sup>; Kaax ujts<sup>04</sup>; Thak pux, chak pux<sup>07</sup>

Used by (3\*): Zoque<sup>03</sup>; Mixe<sup>04</sup>; Huastec<sup>07</sup>

Used for (4#): Psychological<sup>07</sup>; Skin<sup>03, 04</sup>; General and Unspecified<sup>07</sup>

Cognates:

Language contact:

### ***Ludwigia* (Onagraceae)**

Spanish names: Clavillo; Clavito

Indigenous names: Clavo sotyi<sup>03</sup>; Nø monda ujts<sup>04</sup>; Kla'uxa pim<sup>14</sup>; Tzentialeche<sup>26</sup>

Used by (4\*): Zoque<sup>03</sup>; Mixe<sup>04</sup>; Quichean Maya<sup>14</sup>; Nahuatl<sup>26</sup>

Used for (10#): Digestive<sup>03, 14, 26</sup>; Neurological<sup>03</sup>; Respiratory<sup>03, 26</sup>; Skin<sup>04, 26</sup>; Female genital<sup>14</sup>; General and Unspecified<sup>14</sup>

Cognates:

Language contact:

### ***Luehea* (Malvaceae)**

Spanish names: Tepecacao

Indigenous names: Cang cang pujki<sup>03</sup>; K'askat<sup>09</sup>

Used by (2\*): Zoque<sup>03</sup>; Yucatecan Maya<sup>09</sup>

Used for (5#): Skin<sup>03, 09</sup>; Urological<sup>03</sup>; Female genital<sup>03</sup>; General and Unspecified<sup>03</sup>

Cognates:

Language contact:

### ***Luffa* (Cucurbitaceae)**

Spanish names: Estropajo; Limpion

Indigenous names: Po't<sup>04</sup>

Used by (3\*): Mixe<sup>04</sup>; Yucatecan Maya<sup>09</sup>; Zapotec<sup>21</sup>

Used for (4#): Digestive<sup>09</sup>; Skin<sup>04, 21</sup>; Urological<sup>09</sup>

Cognates:

Language contact:

### ***Lupinus* (Fabaceae)**

Spanish names: Alfalfa

Indigenous names: Much' Q'os<sup>12</sup>

Used by (1\*): Quichean Maya<sup>12</sup>

Used for (2#): Blood<sup>12</sup>; Pregnancy<sup>12</sup>

Cognates:

Language contact:

### ***Lycianthes* (Solanaceae)**

Spanish names: Majagua blanco

Indigenous names: Popo po'a<sup>01</sup>; Masan ay<sup>03</sup>; Roq' Xa'an<sup>14</sup>

Used by (3\*): Zoque<sup>01, 03</sup>; Quichean Maya<sup>14</sup>

Used for (3#): Skin<sup>01, 03, 14</sup>

Cognates:

Language contact:

### ***Lycopodium* (Lycopodiaceae)**

Spanish names: Licopodio

Indigenous names:

Used by (1\*): Zoque<sup>01</sup>

Used for (1#): Cardiovascular<sup>01</sup>

Cognates:

Language contact:

### ***Lycoseris* (Asteraceae)**

Spanish names: Santa María

Indigenous names:

Used by (1\*): Quichean Maya<sup>14</sup>

Used for (1#): Skin<sup>14</sup>

Cognates:

Language contact:

### ***Lygodium* (Lygodiaceae)**

Spanish names: Alambrilla; Atagota de bejuco; Atagota de bejuco, Bejuco de lambri; Curalina/hoja vishu; Doradilla, quebrahaca; Hoja de la vibora

Indigenous names: Zajin syingtzyl/o'osi ay<sup>02</sup>; Naxiui<sup>03</sup>; Kuti' iny ujts<sup>04</sup>; K'util papaam, paxlaab papaan<sup>07</sup>; Rich' Mu' li' ba', Ruxb'i Kaaq'i<sup>14</sup>; Ruxb'i'kaak<sup>16</sup>; Ruxb'i kaak<sup>17</sup>; Yop'te hacha<sup>18</sup>; Guixa'a mbala'a<sup>21</sup>

Used by (9\*): Zoque<sup>02, 03</sup>; Mixe<sup>04</sup>; Huastec<sup>07</sup>; Quichean Maya<sup>14, 16, 17</sup>; Western Maya<sup>18</sup>; Zapotec<sup>21</sup>

Used for (23#): Digestive<sup>03, 07</sup>; Musculoskeletal<sup>14</sup>; Neurological<sup>14, 16</sup>; Psychological<sup>02, 07, 16</sup>; Skin<sup>02, 03, 04, 21</sup>; Endocrine<sup>07</sup>; Urological<sup>02, 03, 18</sup>; Pregnancy<sup>07</sup>; Female genital<sup>02</sup>; General and Unspecified<sup>07, 16</sup>; nd<sup>17</sup>

Cognates: Quich: ruxb'i kaak;

Language contact: Mixe <> Hua; Hua <> Zap

### ***Lysiloma* (Fabaceae)**

Spanish names: Guaje del campo; Quebracho; Songuavite; Tepehuaje, tehuaje; Timbre

Indigenous names: Cana cuy<sup>03</sup>; Wayal<sup>07</sup>; Tsalam<sup>09</sup>; Yaj<sup>19</sup>; Lya<sup>22</sup>; Tehuaxi<sup>28</sup>

Used by (7\*): Zoque<sup>03</sup>; Huastec<sup>07</sup>; Yucatecan Maya<sup>09</sup>; Western Maya<sup>19</sup>; Zapotec<sup>22</sup>; Nahua<sup>26, 28</sup>

Used for (17#): Digestive<sup>03, 07, 19, 22, 26, 28</sup>; Neurological<sup>07, 09, 19</sup>; Psychological<sup>07</sup>; Respiratory<sup>28</sup>; Skin<sup>03, 07</sup>; Endocrine<sup>03</sup>; Female genital<sup>03, 07</sup>; General and Unspecified<sup>07</sup>

Cognates:

Language contact: Hua <> Chortí <> Zap <> Nah

### ***Lythrum* (Lythraceae)**

Spanish names:

Indigenous names: Lehem ts'ohool, tsab k'a'um, itsaan an maan witsiil<sup>07</sup>; Tlalhuayopactle<sup>26</sup>

Used by (2\*): Huastec<sup>07</sup>; Nahua<sup>26</sup>

Used for (4#): Neurological<sup>26</sup>; Respiratory<sup>26</sup>; Skin<sup>26</sup>; General and Unspecified<sup>07</sup>

Cognates:

Language contact:

### ***Macadamia* (Proteaceae)**

Spanish names: Macadamia

Indigenous names:

Used by (1\*): Quichean Maya<sup>12</sup>

Used for (5#): Digestive<sup>12</sup>; Neurological<sup>12</sup>; Psychological<sup>12</sup>; Skin<sup>12</sup>; General and Unspecified<sup>12</sup>

Cognates:

Language contact:

### ***Machaerium* (Fabaceae)**

Spanish names: Uña de gato; Uña de gato/sangre de cristo; Uña de gavilan

Indigenous names: Powui kà'tzi ma'syi<sup>02</sup>; Nɣpin tsay<sup>03</sup>; Misi kʷtsʷs<sup>03</sup>; Santo no'ot<sup>04</sup>; Itsik' t'iiw<sup>07</sup>; Pur caham<sup>16</sup>; Lokoch k'ix<sup>17</sup>

Used by (7\*): Zoque<sup>01, 02, 03</sup>; Mixe<sup>04</sup>; Huastec<sup>07</sup>; Quichean Maya<sup>16, 17</sup>

Used for (18#): Digestive<sup>03, 04</sup>; Neurological<sup>02, 07</sup>; Psychological<sup>16</sup>; Skin<sup>03, 04</sup>; Endocrine<sup>03</sup>; Female genital<sup>03</sup>; General and Unspecified<sup>01</sup>; nd<sup>17</sup>

Cognates:

Language contact:

### ***Maclura* (Moraceae)**

Spanish names: Murra

Indigenous names: Tsitsiy<sup>07</sup>

Used by (2\*): Zoque<sup>03</sup>; Huastec<sup>07</sup>

Used for (8#): Musculoskeletal<sup>07</sup>; Neurological<sup>03, 07</sup>; Respiratory<sup>07</sup>; Skin<sup>07</sup>; Urological<sup>07</sup>; General and Unspecified<sup>03, 07</sup>

Cognates:

Language contact:

### ***Macrothelypteris* (Thelypteridaceae)**

Spanish names: Helecho silvestre/ macho

Indigenous names: Ocopetate<sup>26</sup>

Used by (1\*): Nahua<sup>26</sup>

Used for (2#): Psychological<sup>26</sup>; Urological<sup>26</sup>

Cognates:

Language contact:

### ***Magnolia* (Magnoliaceae)**

Spanish names: Flor de corazón; Flor de corazón, magnolia; Magnolia; Yololxochitl; Yoloxóchitl

Indigenous names: Tzoko jǎyǎ/Tzapi kopak<sup>01</sup>; Pa' ju'us/tzokoy toya jǎyǎ<sup>02</sup>; Mooyniakcuy<sup>03</sup>; Kuwi šanat<sup>05</sup>; Qui'huixan, qu'yu xanat<sup>06</sup>; Yagabedxii<sup>21</sup>

Used by (7\*): Zoque<sup>01, 02, 03</sup>; Totonac<sup>05, 06</sup>; Quichean Maya<sup>12</sup>; Zapotec<sup>21</sup>

Used for (24#): Digestive<sup>01, 02, 03, 05, 21</sup>; Cardiovascular<sup>02, 05, 06, 12, 21</sup>; Neurological<sup>12</sup>; Psychological<sup>01, 05, 06, 12</sup>; Pregnancy<sup>03, 05, 06</sup>;

Female genital<sup>03</sup>; General and Unspecified<sup>01, 05, 12</sup>

Cognates: Zoq: tzoko jǎyǎ; Tot: kuwi xanat;

Language contact:

### ***Maianthemum* (Asparagaceae)**

Spanish names: Vara de Salomón

Indigenous names:

Used by (1\*): Quichean Maya<sup>12</sup>

Used for (3#): Cardiovascular<sup>12</sup>; Urological<sup>12</sup>; General and Unspecified<sup>12</sup>

Cognates:

Language contact:

### ***Malachra* (Malvaceae)**

Spanish names: Hierba de Cancer; Malva; Malva peluda

Indigenous names: Pulik thipon, paktha' thipon<sup>07</sup>; Tza' Tzalun Mi' Ha<sup>14</sup>

Used by (4\*): Zoque<sup>01</sup>; Huastec<sup>07</sup>; Quichean Maya<sup>14</sup>; Western Maya<sup>18</sup>

Used for (7#): Digestive<sup>18</sup>; Psychological<sup>01</sup>; Urological<sup>01</sup>; General and Unspecified<sup>01, 07, 14</sup>

Cognates:

Language contact:



### ***Malouetia* (Apocynaceae)**

Spanish names: Mbiigu' moradu

Indigenous names:

Used by (1\*): Zapotec<sup>21</sup>

Used for (1#): Skin<sup>21</sup>

Cognates:

Language contact:

### ***Malpighia* (Malpighiaceae)**

Spanish names:

Indigenous names: K'ak'al ilaal<sup>07</sup>

Used by (1\*): Huastec<sup>07</sup>

Used for (3#): Neurological<sup>07</sup>; Respiratory<sup>07</sup>; General and Unspecified<sup>07</sup>

Cognates:

Language contact:

### ***Malus* (Rosaceae)**

Spanish names: Manzana

Indigenous names: Yàg-mànzân<sup>23</sup>

Used by (2\*): Quichean Maya<sup>12</sup>; Zapotec<sup>23</sup>

Used for (5#): Digestive<sup>12</sup>; Eye<sup>12</sup>; Respiratory<sup>12, 23</sup>; General and Unspecified<sup>12</sup>

Cognates:

Language contact:

### ***Malva* (Malvaceae)**

Spanish names: Hierba del puerco; Malba; Malva

Indigenous names: Tankilkixit<sup>08</sup>; Cho'j, tzelej, tze'ek<sup>13</sup>; Gišlobeh<sup>22</sup>; Blàg-mêd, guìzh-blàg-mêd, mâl<sup>23</sup>

Used by (8\*): Zoque<sup>01</sup>; Huastec<sup>08</sup>; Quichean Maya<sup>12, 13</sup>; Zapotec<sup>22, 23</sup>; Nahua<sup>25, 26</sup>

Used for (37#): Blood<sup>12</sup>; Digestive<sup>01, 12, 13, 22</sup>; Eye<sup>13</sup>; Cardiovascular<sup>12</sup>; Musculoskeletal<sup>01</sup>; Neurological<sup>12</sup>; Psychological<sup>12, 13</sup>; Respiratory<sup>13, 25</sup>; Skin<sup>01, 08, 12, 13, 23, 25</sup>; Urological<sup>12, 13, 22</sup>; Pregnancy<sup>22, 26</sup>; Female genital<sup>01, 12, 13, 23, 26</sup>; General and Unspecified<sup>01, 12, 13, 22, 23, 25</sup>

Cognates:

Language contact:

### ***Malvastrum* (Malvaceae)**

Spanish names: Malva

Indigenous names: Thipon, manath thipon<sup>07</sup>; Lanthathipon<sup>07</sup>

Used by (2\*): Zoque<sup>03</sup>; Huastec<sup>07</sup>

Used for (5#): Digestive<sup>07</sup>; Psychological<sup>03</sup>; Skin<sup>07</sup>; General and Unspecified<sup>07</sup>

Cognates:

Language contact:

### ***Malvaviscus* (Malvaceae)**

Spanish names: Amapola; Chavelita del monte; Monacillo; Monasillo, Ombligo de Caballo, Hierba Lengua; Orín de diablo/tulipán/Chavelita de jardín; Rompe olla; Sibí, sibil; Tres colores; Tulipancito del río

Indigenous names: Kin nyäpin<sup>01</sup>; Tzyi juts<sup>02</sup>; Xoun pocuy<sup>03</sup>; Xuuxy aay<sup>04</sup>; Ix bek'em, thoot wits<sup>07</sup>; Bisil-che', Bisil, Holol<sup>09</sup>; Ru kotzij tzunum, Muxu'xkej, Râq' Q'os Aq'om<sup>12</sup>; Oxib Xbonol<sup>14</sup>; Yopo'aj ts'ibi<sup>18</sup>; Tulipan duendi<sup>21</sup>

Used by (12\*): Zoque<sup>01, 02, 03</sup>; Mixe<sup>04</sup>; Huastec<sup>07</sup>; Yucatecan Maya<sup>09</sup>; Quichean Maya<sup>12, 13, 14</sup>; Western Maya<sup>18</sup>; Zapotec<sup>21</sup>; Nahua<sup>26</sup>

Used for (39#): Digestive<sup>01, 02, 03, 04, 07, 09, 12, 13, 18</sup>; Eye<sup>18</sup>; Musculoskeletal<sup>01, 07</sup>; Respiratory<sup>01, 03, 07, 21, 26</sup>; Skin<sup>03, 12, 18, 21, 26</sup>; Endocrine<sup>14</sup>; Urological<sup>02, 03, 21</sup>; Pregnancy<sup>04, 07</sup>; Female genital<sup>03, 07, 12</sup>; General and Unspecified<sup>01, 03, 07, 12, 13, 21</sup>

Cognates:

Language contact:

### ***Mandevilla* (Apocynaceae)**

Spanish names:

Indigenous names: Katx muk<sup>03</sup>

Used by (1\*): Zoque<sup>03</sup>

Used for (1#): Skin<sup>03</sup>

Cognates:

Language contact:

### ***Manfreda* (Asparagaceae)**

Spanish names: Asosena sabanera

Indigenous names: Copa asosena<sup>03</sup>; Pulik k'oyol, k'oyol ist'aamal, eemil kw'a<sup>07</sup>; Pets'k'im, Pets'k'inil<sup>09</sup>

Used by (3\*): Zoque<sup>03</sup>; Huastec<sup>07</sup>; Yucatecan Maya<sup>09</sup>

Used for (6#): Neurological<sup>07, 09</sup>; Respiratory<sup>07</sup>; Skin<sup>03, 07</sup>; Pregnancy<sup>03</sup>

Cognates:

Language contact:

### ***Mangifera* (Anacardiaceae)**

Spanish names: Mango

Indigenous names: Manku<sup>03</sup>; Mang aay<sup>04</sup>; Q'anatz'ub<sup>12</sup>; Ma'nk<sup>14</sup>; U pam<sup>18</sup>; Malak<sup>19</sup>; Manko<sup>20</sup>; Yàg-mângw<sup>23</sup>; Maniltzapotl<sup>28</sup>

Used by (15\*): Zoque<sup>01, 02, 03</sup>; Mixe<sup>04</sup>; Totonac<sup>06</sup>; Yucatecan Maya<sup>09</sup>; Quichean Maya<sup>12, 13, 14</sup>; Western Maya<sup>18, 19, 20</sup>; Zapotec<sup>21, 23</sup>; Nahua<sup>28</sup>

Used for (38#): Digestive<sup>01, 02, 03, 06, 12, 13, 18, 19, 20, 21</sup>; Cardiovascular<sup>02</sup>; Musculoskeletal<sup>01, 02, 06</sup>; Neurological<sup>03, 18, 23</sup>; Respiratory<sup>02, 03, 12, 14, 19, 21, 28</sup>; Skin<sup>01, 03, 21</sup>; Urological<sup>03</sup>; Pregnancy<sup>09</sup>; Female genital<sup>01, 02, 03</sup>; General and Unspecified<sup>01, 02, 04, 09, 12, 21</sup>

Cognates:

Language contact:

### ***Manihot* (Euphorbiaceae)**

Spanish names: Yuca; Yucca

Indigenous names: Pisi<sup>01</sup>; T'inche<sup>07</sup>; Ts'iim<sup>09</sup>; Tzín<sup>13</sup>; Tz'in<sup>18</sup>; Guyaajaca'a<sup>21</sup>

Used by (7\*): Zoque<sup>01, 03</sup>; Huastec<sup>07</sup>; Yucatecan Maya<sup>09</sup>; Quichean Maya<sup>13</sup>; Western Maya<sup>18</sup>; Zapotec<sup>21</sup>

Used for (10#): Digestive<sup>01, 03, 07, 13, 18</sup>; Skin<sup>09</sup>; Female genital<sup>18</sup>; General and Unspecified<sup>01, 09, 21</sup>

Cognates: Maya: tin/tzin/tzim; CoreM: tzin/tzim;

Language contact: Zoq <> Maya

### ***Manilkara* (Sapotaceae)**

Spanish names: Chicosapote; Chicozapote; Sunzapote; Zapote; Zapote, Chiclé-zapote

Indigenous names: Ji'ya<sup>01</sup>; Jiya<sup>02</sup>; Jiya<sup>03</sup>; Skalu jaka<sup>05</sup>; Ak'so sual<sup>06</sup>; Tsab it'ath<sup>07</sup>; Ya<sup>09</sup>; Ya<sup>10</sup>; Chäbte<sup>18</sup>; Wolja'as<sup>18</sup>; Guil ziji<sup>21</sup>

Used by (12\*): Zoque<sup>01, 02, 03</sup>; Totonac<sup>05, 06</sup>; Huastec<sup>07</sup>; Yucatecan Maya<sup>09, 10</sup>; Quichean Maya<sup>13</sup>; Western Maya<sup>18</sup>; Zapotec<sup>21</sup>; Nahua<sup>24</sup>

Used for (21#): Digestive<sup>06, 07, 09, 10, 13, 18, 21</sup>; Cardiovascular<sup>01, 02</sup>; Psychological<sup>02</sup>; Skin<sup>01, 03, 05</sup>; Endocrine<sup>18</sup>; Urological<sup>03</sup>; Female genital<sup>03, 24</sup>; Male genital<sup>01</sup>; General and Unspecified<sup>21</sup>

Cognates: Zoq: jiya; Yuc: ya;

Language contact: Zoq > Tot & Hua & Tabasco Chontal & Yuc & Zap

### ***Mansoa* (Bignoniaceae)**

Spanish names: Hierba de ajo/hoja de ajo

Indigenous names: Asyus ay<sup>01</sup>; Aaxux ts'aah<sup>07</sup>

Used by (2\*): Zoque<sup>01</sup>; Huastec<sup>07</sup>

Used for (7#): Digestive<sup>07</sup>; Musculoskeletal<sup>01, 07</sup>; Respiratory<sup>01</sup>; Skin<sup>07</sup>; General and Unspecified<sup>01, 07</sup>

Cognates:

Language contact:

### ***Maranta* (Marantaceae)**

Spanish names: Hoja de Sahgún

Indigenous names: Uaja<sup>03</sup>; T'aaw', tsakam thulup<sup>07</sup>; T'aaw' ok<sup>07</sup>; Chaak<sup>09</sup>

Used by (4\*): Zoque<sup>03</sup>; Totonac<sup>06</sup>; Huastec<sup>07</sup>; Yucatecan Maya<sup>09</sup>

Used for (10#): Digestive<sup>06, 07, 09</sup>; Skin<sup>03</sup>; Urological<sup>06, 07</sup>; Female genital<sup>07</sup>; General and Unspecified<sup>06, 07</sup>

Cognates:

Language contact:

### ***Marathrum* (Podostemaceae)**

Spanish names:

Indigenous names: N¥muk, Niu muk<sup>03</sup>

Used by (1\*): Zoque<sup>03</sup>

Used for (3#): Skin<sup>03</sup>; Female genital<sup>03</sup>; General and Unspecified<sup>03</sup>

Cognates:

Language contact:

### ***Marchantia* (Marchantiaceae)**

Spanish names:

Indigenous names: Miim ha<sup>07</sup>

Used by (1\*): Huastec<sup>07</sup>

Used for (2#): Skin<sup>07</sup>; General and Unspecified<sup>07</sup>

Cognates:

Language contact:

### ***Margaranthus* (Solanaceae)**

Spanish names: Totomache

Indigenous names: Tuthaayil an t'iiw<sup>07</sup>

Used by (2\*): Huastec<sup>07</sup>; Nahua<sup>27</sup>

Used for (4#): Digestive<sup>07, 27</sup>; Psychological<sup>27</sup>; Endocrine<sup>27</sup>

Cognates:

Language contact:

### ***Margaritopsis* (Rubiaceae)**

Spanish names:

Indigenous names: Ketsu ts'ohool, wiichab ts'ohool, pulik puut' ts'aah<sup>07</sup>; Xbakalik<sup>09</sup>

Used by (2\*): Huastec<sup>07</sup>; Yucatecan Maya<sup>09</sup>

Used for (3#): Neurological<sup>09</sup>; Skin<sup>07</sup>; General and Unspecified<sup>07</sup>

Cognates:

Language contact:

### ***Marina* (Fabaceae)**

Spanish names:

Indigenous names: Tiith olom<sup>07</sup>

Used by (1\*): Huastec<sup>07</sup>

Used for (1#): General and Unspecified<sup>07</sup>

Cognates:

Language contact:

### ***Marrubium* (Lamiaceae)**

Spanish names: Marrubia; Marrubio

Indigenous names: Pition gihš<sup>22</sup>; Tzopiloshihuitl<sup>28</sup>

Used by (5\*): Zapotec<sup>22, 23</sup>; Nahua<sup>26, 27, 28</sup>

Used for (14#): Digestive<sup>23, 26, 27, 28</sup>; Musculoskeletal<sup>23</sup>; Neurological<sup>28</sup>; Psychological<sup>26, 27</sup>; Skin<sup>22, 27, 28</sup>; Urological<sup>28</sup>; General and Unspecified<sup>27, 28</sup>

Cognates:

Language contact:

### ***Marsdenia* (Apocynaceae)**

Spanish names: Yerba santa del campo

Indigenous names: Tan ooy<sup>07</sup>; Bala šoh gihš<sup>22</sup>

Used by (2\*): Huastec<sup>07</sup>; Zapotec<sup>22</sup>

Used for (6#): Musculoskeletal<sup>22</sup>; Neurological<sup>22</sup>; Respiratory<sup>22</sup>; Skin<sup>07, 22</sup>; General and Unspecified<sup>22</sup>

Cognates:

Language contact:

### ***Martynia* (Martyniaceae)**

Spanish names: Uña de gato; Uña de gato, Carnavalia, Sarsaparilla

Indigenous names: Joun kʷtsʷs<sup>03</sup>; Itsik' kuxkum<sup>07</sup>; Rixij miss<sup>14</sup>

Used by (6\*): Zoque<sup>01, 02, 03</sup>; Huastec<sup>07</sup>; Yucatecan Maya<sup>09</sup>; Quichean Maya<sup>14</sup>

Used for (14#): Digestive<sup>14</sup>; Eye<sup>02</sup>; Cardiovascular<sup>02</sup>; Musculoskeletal<sup>02</sup>; Respiratory<sup>07</sup>; Endocrine<sup>01, 02</sup>; Urological<sup>09</sup>; Female genital<sup>03, 14</sup>; Male genital<sup>02</sup>; General and Unspecified<sup>02, 03, 07</sup>

Cognates:

Language contact:

### ***Matayba* (Sapindaceae)**

Spanish names:

Indigenous names: Pix pix cuy<sup>03</sup>; Säk uayum<sup>11</sup>

Used by (2\*): Zoque<sup>03</sup>; Yucatecan Maya<sup>11</sup>

Used for (3#): Digestive<sup>03</sup>; Skin<sup>11</sup>; Female genital<sup>03</sup>

Cognates:

Language contact:

### ***Matelea* (Apocynaceae)**

Spanish names:

Indigenous names: Piin-k'ak', Kuyuch-ak', Xp'okini, Emsul<sup>09</sup>

Used by (1\*): Yucatecan Maya<sup>09</sup>

Used for (1#): Skin<sup>09</sup>

Cognates:

Language contact:

### ***Matricaria* (Asteraceae)**

Spanish names: Manzanilla; Manzanilla (dulce); Manzanilla dulce; Manzanilla, camomilla

Indigenous names: Manzaniya<sup>07</sup>; Ix bek'em paktda<sup>08</sup>; Mar'san la', mazne'y<sup>13</sup>; Mantzaniya<sup>20</sup>; Manzaniy neš<sup>22</sup>; Guiè-mànzàni<sup>23</sup>

Used by (20\*): Zoque<sup>01, 02, 03</sup>; Mixe<sup>04</sup>; Totonac<sup>05, 06</sup>; Huastec<sup>07, 08</sup>; Quichean Maya<sup>12, 13, 14</sup>; Western Maya<sup>19, 20</sup>; Zapotec<sup>21, 22, 23</sup>; Nahua<sup>25, 26, 27, 28</sup>

Used for (79#): Blood<sup>12</sup>; Digestive<sup>01, 02, 03, 04, 05, 06, 07, 08, 12, 13, 20, 21, 22, 23, 25, 26, 27, 28</sup>; Eye<sup>01, 02, 08, 13, 27, 28</sup>; Ear<sup>04, 23</sup>; Cardiovascular<sup>08, 12</sup>; Musculoskeletal<sup>01, 03, 12, 13, 19</sup>; Neurological<sup>01, 12, 13, 19, 22, 28</sup>; Psychological<sup>02, 03, 12, 13</sup>; Respiratory<sup>01, 02, 08, 13, 14, 19, 25, 27</sup>; Skin<sup>04, 21, 26</sup>; Urological<sup>12, 22</sup>; Pregnancy<sup>01, 02, 03, 13, 19, 21, 22</sup>; Female genital<sup>01, 02, 12, 13, 19</sup>; Male genital<sup>01, 12</sup>; General and Unspecified<sup>01, 02, 08, 12, 19, 22, 27</sup>

Cognates:

Language contact:

### ***Maxillariella* (Orchidaceae)**

Spanish names:

Indigenous names: Kowa nokcha<sup>03</sup>

Used by (1\*): Zoque<sup>03</sup>

Used for (1#): Digestive<sup>03</sup>

Cognates:

Language contact:

### ***Maytenus* (Celastraceae)**

Spanish names: Retamo

Indigenous names: Niwi cuy<sup>03</sup>

Used by (1\*): Zoque<sup>03</sup>

Used for (6#): Digestive<sup>03</sup>; Neurological<sup>03</sup>; Skin<sup>03</sup>; Urological<sup>03</sup>; Pregnancy<sup>03</sup>; Female genital<sup>03</sup>

Cognates:

Language contact:

### ***Mecardonia* (Plantaginaceae)**

Spanish names: Chotete

Indigenous names: Xotete<sup>03</sup>; Ncuàan-dzéb-maêstr, ncuàan-dzéb-ròo, ncuàan-dzéb-guièel<sup>23</sup>; Tlaquexahuil<sup>26</sup>

Used by (3\*): Zoque<sup>03</sup>; Zapotec<sup>23</sup>; Nahua<sup>26</sup>

Used for (5#): Blood<sup>03</sup>; Skin<sup>26</sup>; Female genital<sup>03</sup>; General and Unspecified<sup>03, 23</sup>

Cognates:

Language contact:

### ***Medicago* (Fabaceae)**

Spanish names: Alfalfa

Indigenous names: Alfâlf, guìzh-frôw, guìzh-âlfâlf<sup>23</sup>

Used by (3\*): Quichean Maya<sup>13</sup>; Zapotec<sup>23</sup>; Nahua<sup>28</sup>

Used for (4#): Psychological<sup>23</sup>; Respiratory<sup>13</sup>; Endocrine<sup>28</sup>; Urological<sup>28</sup>

Cognates:

Language contact:

### ***Melampodium* (Asteraceae)**

Spanish names: Acahualle amarillo; Azaján Criollo; Hoja de azar

Indigenous names: Tza'a tzoj<sup>01</sup>; Smucucu makatama<sup>05</sup>; R'u Wai kej<sup>12</sup>

Used by (3\*): Zoque<sup>01</sup>; Totonac<sup>05</sup>; Quichean Maya<sup>12</sup>

Used for (5#): Digestive<sup>01</sup>; Cardiovascular<sup>05</sup>; Musculoskeletal<sup>12</sup>; General and Unspecified<sup>01, 12</sup>

Cognates:

Language contact:

### ***Melanthera* (Asteraceae)**

Spanish names: Rosita

Indigenous names:

Used by (1\*): Nahua<sup>26</sup>

Used for (1#): Respiratory<sup>26</sup>

Cognates:

Language contact:

### ***Melia* (Meliaceae)**

Spanish names: Paraís; Paraíso; Piocha; Tarai

Indigenous names: Yàg-pàraís<sup>23</sup>

Used by (5\*): Zoque<sup>03</sup>; Totonac<sup>05</sup>; Western Maya<sup>18, 19</sup>; Zapotec<sup>23</sup>

Used for (18#): Blood<sup>03</sup>; Digestive<sup>05, 23</sup>; Ear<sup>03</sup>; Musculoskeletal<sup>03</sup>; Neurological<sup>19</sup>; Skin<sup>03, 18</sup>; Endocrine<sup>03</sup>; Urological<sup>03</sup>; Pregnancy<sup>03, 05</sup>; Female genital<sup>05</sup>; Male genital<sup>05</sup>; General and Unspecified<sup>03, 19, 23</sup>

Cognates:

Language contact:

### ***Melicoccus* (Sapindaceae)**

Spanish names: Guaya

Indigenous names:

Used by (1\*): Western Maya<sup>18</sup>

Used for (1#): Digestive<sup>18</sup>

Cognates:

Language contact:

### ***Melilotus* (Fabaceae)**

Spanish names: Trebe

Indigenous names: Alfâlf, guizh-frôw, guizh-âlfâlf<sup>23</sup>

Used by (2\*): Quichean Maya<sup>12</sup>; Zapotec<sup>23</sup>

Used for (2#): Digestive<sup>12</sup>; Psychological<sup>23</sup>

Cognates:

Language contact:

### ***Melissa* (Lamiaceae)**

Spanish names: Toronjil (de menta)

Indigenous names: Utz<sup>18</sup>

Used by (1\*): Western Maya<sup>18</sup>

Used for (6#): Digestive<sup>18</sup>; Neurological<sup>18</sup>; Psychological<sup>18</sup>; Respiratory<sup>18</sup>; Endocrine<sup>18</sup>; General and Unspecified<sup>18</sup>

Cognates:

Language contact:

### ***Melochia* (Malvaceae)**

Spanish names: Malva morada; Malva rosada; Malvarisco morado

Indigenous names: Tsakam akich, tsabaal akich<sup>07</sup>; Ehtiil i tsakam akich<sup>07</sup>; Lexuba'a moradu'u<sup>21</sup>

Used by (3\*): Zoque<sup>02</sup>; Huastec<sup>07</sup>; Zapotec<sup>21</sup>

Used for (14#): Digestive<sup>02, 07</sup>; Skin<sup>21</sup>; Endocrine<sup>02</sup>; Urological<sup>07</sup>; Pregnancy<sup>07</sup>; Female genital<sup>21</sup>; Male genital<sup>02</sup>; General and Unspecified<sup>02, 07, 21</sup>

Cognates:

Language contact:

### ***Melothria* (Cucurbitaceae)**

Spanish names: Hoja de carga

Indigenous names: Tzämi ay<sup>01</sup>; Tsaiñicut cuy, Xandia tsay<sup>03</sup>; Baleeyail an t'eel<sup>07</sup>; Sandia cho<sup>16</sup>; Sandi'a ch'o<sup>17</sup>

Used by (5\*): Zoque<sup>01, 03</sup>; Huastec<sup>07</sup>; Quichean Maya<sup>16, 17</sup>

Used for (6#): Digestive<sup>07</sup>; Neurological<sup>16</sup>; Psychological<sup>03</sup>; Urological<sup>03</sup>; General and Unspecified<sup>01</sup>; nd<sup>17</sup>

Cognates:

Language contact:

### ***Mendoncia* (Acanthaceae)**

Spanish names:

Indigenous names:

Used by (1\*): Quichean Maya<sup>17</sup>

Used for (1#): nd<sup>17</sup>

Cognates:

Language contact:

### ***Mentha* (Lamiaceae)**

Spanish names: Hierba buena; Hierbabuena; Menta; Menta, Balsamo; Monstranza; Mostranza; Poleo ; Poleo, pompimi;

Toronjil criollo; Toronjil, Balsamo; Toronjil/hierbabuena de mentha; Yerba buena; Yerbabuena

Indigenous names: Yepena<sup>01</sup>; Ujts aay<sup>04</sup>; Castalatka'jna<sup>05</sup>; Caxtalaalhka 'jna', ihpupuhui'na<sup>06</sup>; Elbeenax<sup>07</sup>; Elbenax<sup>08</sup>; Xuiky<sup>08</sup>; Xuuihk<sup>08</sup>; Arvino, q'ebun, purxil', alwino, pãrxil, esal guach pãrxil<sup>13</sup>; Bãnlã utz<sup>18</sup>; Utz<sup>18</sup>; Wena<sup>20</sup>; Bedxestila'a<sup>21</sup>; Bãč štil<sup>22</sup>; Guizh-mònstãnz<sup>23</sup>; Tlanixalnilki<sup>26</sup>; Kallowena<sup>28</sup>

Used by (23\*): Zoque<sup>01, 02, 03</sup>; Mixe<sup>04</sup>; Totonac<sup>05, 06</sup>; Huastec<sup>07, 08</sup>; Yucatecan Maya<sup>09, 11</sup>; Quichean Maya<sup>12, 13, 14</sup>; Western Maya<sup>18, 19, 20</sup>; Zapotec<sup>21, 22, 23</sup>; Nahua<sup>25, 26, 27, 28</sup>

Used for (103#): Digestive<sup>01, 02, 03, 04, 05, 06, 07, 08, 09, 11, 12, 13, 14, 18, 19, 20, 21, 22, 25, 27, 28</sup>; Ear<sup>19</sup>; Cardiovascular<sup>01, 08, 13, 21</sup>;

Musculoskeletal<sup>01, 08, 12, 14, 28</sup>; Neurological<sup>01, 06, 09, 12, 18, 28</sup>; Psychological<sup>01, 08, 12, 18</sup>; Respiratory<sup>01, 02, 05, 08, 12, 13, 14, 18, 19, 23, 27</sup>; Skin<sup>26</sup>; Urological<sup>01, 12, 13</sup>; Pregnancy<sup>03, 05, 07, 13, 19, 23</sup>; Female genital<sup>01, 02, 06, 12, 13, 18, 19</sup>; Male genital<sup>01</sup>; General and Unspecified<sup>01, 03, 05, 08, 12, 13, 14, 18, 21, 25, 26</sup>

Cognates:

Language contact:

### ***Mentzelia* (Loasaceae)**

Spanish names: Mala mujer

Indigenous names: Thekw'em ch'ohool. Itsaan yakw'ab wahuts<sup>07</sup>; Yàg-làa<sup>23</sup>; Guizh-nàad, guièe-nàad<sup>23</sup>

Used by (3\*): Huastec<sup>07</sup>; Zapotec<sup>23</sup>; Nahua<sup>24</sup>

Used for (5#): Psychological<sup>07</sup>; Skin<sup>07, 23</sup>; Pregnancy<sup>23, 24</sup>

Cognates:

Language contact:

### ***Merremia* (Convolvulaceae)**

Spanish names:

Indigenous names: Piith ts'aah<sup>07</sup>; Chuthat po'eel, man ch'aah<sup>07</sup>; San Diego ts'ohool, chuthat pok'eel<sup>07</sup>; Is k'aham<sup>17</sup>

Used by (2\*): Huastec<sup>07</sup>; Quichean Maya<sup>17</sup>

Used for (8#): Ear<sup>07</sup>; Neurological<sup>07</sup>; Skin<sup>07</sup>; General and Unspecified<sup>07</sup>; nd<sup>17</sup>

Cognates:

Language contact: Hua <> Kekchí

### ***Metastelma* (Apocynaceae)**

Spanish names:

Indigenous names: Xiim-ak<sup>09</sup>

Used by (2\*): Zoque<sup>03</sup>; Yucatecan Maya<sup>09</sup>

Used for (3#): Skin<sup>03</sup>; Endocrine<sup>09</sup>; Urological<sup>09</sup>

Cognates:

Language contact:

### ***Miconia* (Melastomataceae)**

Spanish names: Cinco negritos del monte; Palo dulce; Tescuate

Indigenous names: Pak tesua<sup>03</sup>; Tesua<sup>03</sup>; Chuk jeepe<sup>03</sup>; Jama piits<sup>04</sup>; Sa'ksi qui'hui<sup>06</sup>; Kux Sawi'i<sup>14</sup>; Xoy Q'ehen, Kaq'i pim<sup>14</sup>; Ixq'i Q'ehen<sup>14</sup>; Kux Sawi'i, Tzib' Q'en<sup>14</sup>; Wa'bon<sup>14</sup>

Used by (6\*): Zoque<sup>01, 03</sup>; Mixe<sup>04</sup>; Totonac<sup>06</sup>; Quichean Maya<sup>14, 17</sup>

Used for (30#): Digestive<sup>01, 03, 14</sup>; Neurological<sup>14</sup>; Respiratory<sup>03</sup>; Skin<sup>03, 04, 06, 14</sup>; Urological<sup>03</sup>; Pregnancy<sup>03, 14</sup>; Female genital<sup>03</sup>; General and Unspecified<sup>14</sup>; nd<sup>17</sup>

Cognates:

Language contact: Tot <> Kekchí

### ***Microgramma* (Polypodiaceae)**

Spanish names:

Indigenous names: Canagual<sup>03</sup>; Chu'ub te', chu'ub ts'aah<sup>07</sup>; Tipte'-ak<sup>09</sup>

Used by (3\*): Zoque<sup>03</sup>; Huastec<sup>07</sup>; Yucatecan Maya<sup>09</sup>

Used for (4#): Digestive<sup>09</sup>; Musculoskeletal<sup>03, 07</sup>; General and Unspecified<sup>07</sup>

Cognates:

Language contact:

### ***Micromeria* (Lamiaceae)**

Spanish names: Hierba buena

Indigenous names: Bit-wàd, bit-xtîl<sup>23</sup>

Used by (1\*): Zapotec<sup>23</sup>

Used for (1#): Digestive<sup>23</sup>

Cognates:

Language contact:

### ***Micropleura* (Apiaceae)**

Spanish names: Valeriana

Indigenous names: Valeriana<sup>13</sup>; Nich nab momol, nich nab tz'i' lel vomol, vomolal vo', makmak nab wamal, , bokol chuch wamal, bikil ch'o wamal<sup>20</sup>

Used by (2\*): Quichean Maya<sup>13</sup>; Western Maya<sup>20</sup>

Used for (5#): Digestive<sup>20</sup>; Neurological<sup>13, 20</sup>; Pregnancy<sup>20</sup>; Female genital<sup>20</sup>

Cognates:

Language contact:

### ***Microsechium* (Cucurbitaceae)**

Spanish names: Amole, tumba vaquero; Yerba de raton, oreja de raton

Indigenous names: Škwam bizin<sup>22</sup>; Bià-tòò, lbæ-bià-tòò<sup>23</sup>

Used by (2\*): Zapotec<sup>22, 23</sup>

Used for (5#): Neurological<sup>23</sup>; Psychological<sup>23</sup>; Skin<sup>22, 23</sup>; General and Unspecified<sup>23</sup>

Cognates:

Language contact:

### ***Mikania* (Asteraceae)**

Spanish names: Hoja de carga; Tabardillo

Indigenous names: Tzämi tzoy tzämi ay<sup>01</sup>; Wako<sup>07</sup>; Cha'onoob<sup>17</sup>

Used by (5\*): Zoque<sup>01, 03</sup>; Huastec<sup>07</sup>; Quichean Maya<sup>17</sup>; Western Maya<sup>19</sup>

Used for (7#): Digestive<sup>07</sup>; Neurological<sup>19</sup>; Skin<sup>07</sup>; Female genital<sup>03</sup>; General and Unspecified<sup>01, 19</sup>; nd<sup>17</sup>

Cognates:

Language contact:

### ***Milla* (Asparagaceae)**

Spanish names: Lirio

Indigenous names:

Used by (1\*): Quichean Maya<sup>12</sup>

Used for (2#): Neurological<sup>12</sup>; Urological<sup>12</sup>

Cognates:

Language contact:



### ***Milleria* (Asteraceae)**

Spanish names:

Indigenous names: Xø pøh<sup>04</sup>; Xontolok<sup>09</sup>

Used by (2\*): Mixe<sup>04</sup>; Yucatecan Maya<sup>09</sup>

Used for (2#): Skin<sup>04, 09</sup>

Cognates:

Language contact: Mixe <> Yuc

### ***Mimosa* (Fabaceae)**

Spanish names: Adormidero, Zarza Dormilona; Corona de cristo, dormidillo; Dormilona; Duermidillo; Espina dormilona, hierba dormilona; Huaje rosadito, la vergonzosa; La vergonzosa/dormilona; Pinahuixtle; Sarsa sabanera; Tepehuaje cimarron; Tepesquehuite; Tepezcohuite; Tepezcohuite/Pezquehuite; Uña de gato; Uña de gato/espina dormilona/dormilona; Vergonzosa; Vergonzosa grande; Vergonzosa, meramera; Zarza; Zarza Dormilona

Indigenous names: Misyu kä<sup>01</sup>; Pik awit/ anngen yäki/ äksy awit/ awit jäy<sup>01</sup>; Ä' yäwi/ä' wewo tane/ok yäwi<sup>01</sup>; Mo'ay sake ma'syi/ tzasyäkuy ay<sup>02</sup>; Jupupi<sup>02</sup>; Nuk cuy<sup>03</sup>; Mong mong ay<sup>03</sup>; Ma'ap ujts<sup>04</sup>; Tančahuat<sup>05</sup>; Chobeem<sup>07</sup>; Tsobeem, wayma<sup>07</sup>; Sak-katsim, Katsim<sup>09</sup>; Šmuç<sup>10</sup>; Ix mutz<sup>11</sup>; Xu'l Xpe Quej, Q'ix<sup>12</sup>; Xul q'ies, xul kiej, Cxal kij<sup>13</sup>; Wara Q'ix<sup>14</sup>; Quare kix<sup>16</sup>; Ajwäye<sup>18</sup>; Guedzegumaj'alaj<sup>21</sup>; Gueedxe boog<sup>21</sup>; Guièts-làa-tó, guizh-lòo-tó], guièts-guièe-tó<sup>23</sup>; Yàg-guièts-nàad<sup>23</sup>; Xohuocihuistle<sup>26</sup>; Pinahuitz<sup>28</sup>

Used by (20\*): Zoque<sup>01, 02, 03</sup>; Mixe<sup>04</sup>; Totonac<sup>05</sup>; Huastec<sup>07</sup>; Yucatecan Maya<sup>09, 10, 11</sup>; Quichean Maya<sup>12, 13, 14, 15, 16</sup>; Western Maya<sup>18</sup>; Zapotec<sup>21, 23</sup>; Nahua<sup>26, 27, 28</sup>

Used for (80#): Digestive<sup>01, 03, 05, 12, 21, 23, 26, 28</sup>; Eye<sup>03</sup>; Musculoskeletal<sup>01, 12</sup>; Neurological<sup>02, 12, 14</sup>; Psychological<sup>01, 02, 03, 04, 07, 10, 12, 14, 15, 16, 18, 21</sup>; Respiratory<sup>03, 09, 18, 26</sup>; Skin<sup>01, 02, 03, 07, 12, 13, 21, 28</sup>; Endocrine<sup>01, 27, 28</sup>; Urological<sup>01, 12, 21</sup>; Pregnancy<sup>02, 07, 12, 15, 26</sup>; Female genital<sup>03, 13</sup>; General and Unspecified<sup>01, 02, 03, 11, 12, 14, 18, 21, 23, 28</sup>

Cognates: Zoq: mo' ay / mong ay; Yuc: xmutz; Quich: xul kejj, (q'ix);

Language contact: Chiapas Zoq > Tabasco Chontal

### ***Mimulus* (Phrymaceae)**

Spanish names: Verdolaga

Indigenous names:

Used by (1\*): Quichean Maya<sup>13</sup>

Used for (1#): General and Unspecified<sup>13</sup>

Cognates:

Language contact:

### ***Mirabilis* (Nyctaginaceae)**

Spanish names: Flor de linda tarde; Hoja de linda tarde, flor de china; Maravilla; Maravilla/ mañanita/ flor de noche

Indigenous names: Tzuj jäy<sup>01</sup>; Txuang mooya<sup>03</sup>; tsu pøh<sup>04</sup>; Ch'uyeem<sup>07</sup>; Guièe-màràvî, guièe-mòròvî<sup>23</sup>

Used by (11\*): Zoque<sup>01, 02, 03</sup>; Mixe<sup>04</sup>; Huastec<sup>07</sup>; Yucatecan Maya<sup>10, 11</sup>; Quichean Maya<sup>13</sup>; Western Maya<sup>18</sup>; Zapotec<sup>21, 23</sup>

Used for (31#): Digestive<sup>02, 07, 23</sup>; Eye<sup>02</sup>; Musculoskeletal<sup>01, 02, 11, 21</sup>; Neurological<sup>02, 18</sup>; Psychological<sup>01, 03, 13</sup>; Respiratory<sup>01, 02, 07, 21</sup>; Skin<sup>01, 02, 04, 10, 18, 21</sup>; Female genital<sup>02</sup>; General and Unspecified<sup>01, 03, 07, 11, 18, 21</sup>

Cognates: MZ: tsu/txu;

Language contact: MZ > Hua

### ***Mollinedia* (Monimiaceae)**

Spanish names:

Indigenous names: Sakim pim<sup>16</sup>; Sak'i k'ejen<sup>17</sup>

Used by (2\*): Quichean Maya<sup>16, 17</sup>

Used for (2#): Neurological<sup>16</sup>; nd<sup>17</sup>

Cognates:

Language contact:

### ***Mollugo* (Molluginaceae)**

Spanish names:

Indigenous names: Billushit<sup>22</sup>

Used by (1\*): Zapotec<sup>22</sup>

Used for (1#): Digestive<sup>22</sup>

Cognates:

Language contact:

### ***Momordica* (Cucurbitaceae)**

Spanish names: Condiamor; Cu'undu amor; Cundeamor; Cundiamor; Cunduamor; Manzanina; Manzanita, flor de chino; Sandía de Ratón, Jaime; Sorosi

Indigenous names: Paks ko'kinä<sup>02</sup>; Kundiamor<sup>03</sup>; Pa xandia<sup>04</sup>; Morax<sup>09</sup>; Sandiy'cho<sup>14</sup>; Ya'mor<sup>17</sup>; Kwnyamor<sup>18</sup>

Used by (12\*): Zoque<sup>01, 02, 03</sup>; Mixe<sup>04</sup>; Yucatecan Maya<sup>09, 10, 11</sup>; Quichean Maya<sup>14, 15, 17</sup>; Western Maya<sup>18</sup>; Zapotec<sup>21</sup>

Used for (33#): Blood<sup>10</sup>; Digestive<sup>02, 11</sup>; Musculoskeletal<sup>02, 03, 14</sup>; Neurological<sup>04</sup>; Respiratory<sup>02, 04</sup>; Skin<sup>02, 03, 09, 18, 21</sup>; Endocrine<sup>01, 02, 03, 10, 11, 14, 18, 21</sup>; Urological<sup>03, 11</sup>; Pregnancy<sup>03</sup>; Female genital<sup>02, 15</sup>; Male genital<sup>18</sup>; General and Unspecified<sup>02, 04, 11, 14</sup>; nd<sup>17</sup>

Cognates:

Language contact:

### ***Monnina* (Polygalaceae)**

Spanish names: San Benito, tintiamora

Indigenous names: Cha xu q'an<sup>13</sup>

Used by (1\*): Quichean Maya<sup>13</sup>

Used for (1#): Eye<sup>13</sup>

Cognates:

Language contact:

### ***Monochaetum* (Melastomataceae)**

Spanish names:

Indigenous names: Cacaloxihuitle<sup>26</sup>

Used by (2\*): Zoque<sup>03</sup>; Nahua<sup>26</sup>

Used for (5#): Digestive<sup>26</sup>; Respiratory<sup>26</sup>; Skin<sup>03</sup>; Female genital<sup>26</sup>; General and Unspecified<sup>03</sup>

Cognates:

Language contact:

### ***Monstera* (Araceae)**

Spanish names: Hoja de corazón; Tripa de pollo

Indigenous names: Anma ay<sup>03</sup>; Xunujti tsay<sup>03</sup>; Chibaba<sup>21</sup>

Used by (2\*): Zoque<sup>03</sup>; Zapotec<sup>21</sup>

Used for (4#): Digestive<sup>03</sup>; Skin<sup>03</sup>; General and Unspecified<sup>21</sup>

Cognates:

Language contact:

### ***Montanoa* (Asteraceae)**

Spanish names: Acahuite; Chamizo negro; Flor de papera, flor de teresita; Penumbra

Indigenous names: Xtankas- ak', Xuxtankas<sup>09</sup>; Yag tsun<sup>22</sup>; Yàg-yàaz-yâas, yàg-yàaz-ngäs<sup>23</sup>

Used by (7\*): Zoque<sup>01, 03</sup>; Yucatecan Maya<sup>09</sup>; Zapotec<sup>21, 22, 23</sup>; Nahua<sup>27</sup>

Used for (13#): Digestive<sup>01, 21, 22, 23</sup>; Musculoskeletal<sup>01</sup>; Skin<sup>03, 21, 23</sup>; Pregnancy<sup>23</sup>; General and Unspecified<sup>09, 21, 22, 27</sup>

Cognates:

Language contact: Yuc <> Zap

### ***Morella* (Myricaceae)**

Spanish names: Arrayana/laurel simarron; Garrote de viejito, rajian, arrayan

Indigenous names: Ot kamay/ jotomgay kamay<sup>01</sup>; Copa puso<sup>03</sup>; Pom che', uch'mix Tiox<sup>13</sup>; Sera te<sup>20</sup>; Ahuaxochitl<sup>25</sup>; Xochicuahuitl<sup>26</sup>

Used by (6\*): Zoque<sup>01, 03</sup>; Quichean Maya<sup>13</sup>; Western Maya<sup>20</sup>; Nahua<sup>25, 26</sup>

Used for (18#): Digestive<sup>01, 13, 20</sup>; Cardiovascular<sup>25</sup>; Musculoskeletal<sup>01, 13</sup>; Neurological<sup>13</sup>; Psychological<sup>01</sup>; Respiratory<sup>03</sup>; Pregnancy<sup>01, 13</sup>; Female genital<sup>03, 13</sup>; General and Unspecified<sup>01, 03, 13, 25, 26</sup>

Cognates:

Language contact:

### ***Morinda* (Rubiaceae)**

Spanish names: Noni; Noni/cancero; Nonis; Piñita

Indigenous names: Piña ak', Piña kam<sup>09</sup>; K'an i che'<sup>17</sup>

Used by (7\*): Zoque<sup>01, 02</sup>; Yucatecan Maya<sup>09, 11</sup>; Quichean Maya<sup>12, 14, 17</sup>

Used for (13#): Digestive<sup>02</sup>; Cardiovascular<sup>02, 11</sup>; Skin<sup>09</sup>; Endocrine<sup>02, 14</sup>; Urological<sup>01, 02</sup>; Pregnancy<sup>01</sup>; General and Unspecified<sup>01, 02, 12</sup>; nd<sup>17</sup>

Cognates:

Language contact:

### ***Moringa* (Moringaceae)**

Spanish names: Jacinto; Moringa; San Jacinto

Indigenous names:

Used by (4\*): Zoque<sup>02</sup>; Quichean Maya<sup>12, 14</sup>; Zapotec<sup>21</sup>

Used for (8#): Digestive<sup>12</sup>; Musculoskeletal<sup>02, 21</sup>; Respiratory<sup>02</sup>; Endocrine<sup>12, 14</sup>; General and Unspecified<sup>12, 21</sup>

Cognates:

Language contact:

### ***Mortonioidendron* (Malvaceae)**

Spanish names:

Indigenous names: Kaq'i B'ach<sup>14</sup>

Used by (1\*): Quichean Maya<sup>14</sup>

Used for (2#): Pregnancy<sup>14</sup>; Female genital<sup>14</sup>

Cognates:

Language contact:

### ***Mosannonna* (Annonaceae)**

Spanish names: Lemoy

Indigenous names: Elemuy<sup>09</sup>

Used by (2\*): Yucatecan Maya<sup>09, 11</sup>

Used for (3#): Endocrine<sup>09</sup>; Urological<sup>09</sup>; General and Unspecified<sup>11</sup>

Cognates:

Language contact:

### ***Mosquitoxylum* (Anacardiaceae)**

Spanish names: Cedro nogal

Indigenous names: Se'mpe<sup>03</sup>

Used by (1\*): Zoque<sup>03</sup>

Used for (2#): Female genital<sup>03</sup>; General and Unspecified<sup>03</sup>

Cognates:

Language contact:

### ***Mouriri* (Melastomataceae)**

Spanish names:

Indigenous names: Chak B'olay Q'ehen<sup>14</sup>

Used by (1\*): Quichean Maya<sup>14</sup>

Used for (2#): Digestive<sup>14</sup>; Skin<sup>14</sup>

Cognates:

Language contact:

### ***Moussonia* (Gesneriaceae)**

Spanish names: Cerbatanera; Hierba de zopilote

Indigenous names: Ajpu Q'ehen<sup>14</sup>; Cacahuatón<sup>26</sup>

Used by (2\*): Quichean Maya<sup>14</sup>; Nahua<sup>26</sup>

Used for (5#): Digestive<sup>26</sup>; Respiratory<sup>26</sup>; Endocrine<sup>26</sup>; Female genital<sup>26</sup>; General and Unspecified<sup>14</sup>

Cognates:

Language contact:

### ***Mucuna* (Fabaceae)**

Spanish names: Nescafé; Nescafé, picapica; Ojo de venado; Pica pica

Indigenous names: Kunkun<sup>02</sup>; Moxoox<sup>07</sup>; Neskaape, tsanakw' thut<sup>07</sup>; Xpica<sup>09</sup>

Used by (7\*): Zoque<sup>01, 02, 03</sup>; Huastec<sup>07</sup>; Yucatecan Maya<sup>09</sup>; Quichean Maya<sup>13</sup>; Zapotec<sup>21</sup>

Used for (12#): Digestive<sup>07, 09</sup>; Eye<sup>13</sup>; Cardiovascular<sup>01</sup>; Neurological<sup>02, 07</sup>; Psychological<sup>03</sup>; Respiratory<sup>07</sup>; Skin<sup>07</sup>; General and Unspecified<sup>07, 21</sup>

Cognates:

Language contact:

### ***Muehlenbeckia* (Polygonaceae)**

Spanish names: Cola de cabello

Indigenous names:

Used by (1\*): Nahua<sup>26</sup>

Used for (2#): Musculoskeletal<sup>26</sup>; Urological<sup>26</sup>

Cognates:

Language contact:

### ***Muntingia* (Muntingiaceae)**

Spanish names: Capulín

Indigenous names: Mukpe/ujuk kuy<sup>01</sup>; Mupe<sup>02</sup>; Capuli<sup>03</sup>; Mujt<sup>04</sup>; Tsakam puwaamte', puam<sup>07</sup>; Pujam<sup>18</sup>; Mbe'e ze'e<sup>21</sup>

Used by (7\*): Zoque<sup>01, 02, 03</sup>; Mixe<sup>04</sup>; Huastec<sup>07</sup>; Western Maya<sup>18</sup>; Zapotec<sup>21</sup>

Used for (19#): Digestive<sup>02, 03, 18, 21</sup>; Musculoskeletal<sup>02</sup>; Respiratory<sup>01, 02, 21</sup>; Skin<sup>03, 04, 18, 21</sup>; Urological<sup>03</sup>; Pregnancy<sup>01, 07</sup>; Female genital<sup>03</sup>; General and Unspecified<sup>02, 04, 21</sup>

Cognates: MZ: mu; Zoq: mu(k)pe; Maya: pu(j)am;

Language contact:

### ***Murraya* (Rutaceae)**

Spanish names: Limonaria; Muraya

Indigenous names:

Used by (2\*): Zoque<sup>03</sup>; Yucatecan Maya<sup>09</sup>

Used for (2#): Neurological<sup>03</sup>; Respiratory<sup>09</sup>

Cognates:

Language contact:

### ***Musa* (Musaceae)**

Spanish names: Guineo; Muide; Platano; Plátano (macho), yopin tzup, Plátano roatán; Platano blanco, guineo, platano manzano, platano keny, platano roatan; Platano cherimoya, platano pera, platano bolsa; Platano rojo; Platano, guineo, banano; Platano/guineo

Indigenous names: Tsapuo<sup>01</sup>; Patanus/patanusy/kineya<sup>02</sup>; Hoko samñi<sup>03</sup>; Ka'ak<sup>04</sup>; See'kna<sup>06</sup>; See'kna, tet'see'kann<sup>06</sup>; It'ath<sup>07</sup>; Costillon it'adh<sup>08</sup>; Ha'as<sup>09</sup>; Inkiney, skul<sup>13</sup>; Xcol'itul, Ik B'olay Q'eheh<sup>14</sup>; Ja'as, Ajuatan<sup>18</sup>; Kene<sup>19</sup>; Biduáj<sup>21</sup>

Used by (15\*): Zoque<sup>01, 02, 03</sup>; Mixe<sup>04</sup>; Totonac<sup>06</sup>; Huastec<sup>07, 08</sup>; Yucatecan Maya<sup>09</sup>; Quichean Maya<sup>12, 13, 14</sup>; Western Maya<sup>18, 19</sup>; Zapotec<sup>21</sup>; Nahua<sup>24</sup>

Used for (38#): Digestive<sup>01, 02, 03, 04, 06, 07, 09, 13, 14, 18, 19, 21</sup>; Psychological<sup>01, 18</sup>; Respiratory<sup>06, 21</sup>; Skin<sup>01, 02, 03, 06, 07, 13, 14, 18, 21</sup>; Endocrine<sup>18</sup>; Urological<sup>06</sup>; Pregnancy<sup>24</sup>; Female genital<sup>01, 21</sup>; Male genital<sup>01</sup>; General and Unspecified<sup>01, 02, 08, 12, 14, 21</sup>

Cognates:

Language contact:

### ***Myrcianthes* (Myrtaceae)**

Spanish names:

Indigenous names: Cheks<sup>03</sup>

Used by (1\*): Zoque<sup>03</sup>

Used for (1#): Digestive<sup>03</sup>

Cognates:

Language contact:

### ***Myriocarpa* (Urticaceae)**

Spanish names: Chalagoge, panza de burro; Pegasoso/palo de barba/caracolillo/ la barbosa

Indigenous names: (Mo'a) siskuy<sup>01</sup>; Tzoki 'an panatz/tzok yan panats<sup>01</sup>; Nä ninki<sup>02</sup>

Used by (2\*): Zoque<sup>01, 02</sup>

Used for (5#): Digestive<sup>01</sup>; Musculoskeletal<sup>02</sup>; Skin<sup>01</sup>; Urological<sup>01</sup>; General and Unspecified<sup>01</sup>

Cognates:

Language contact:

### ***Myristica* (Myristicaceae)**

Spanish names: Nuez moscada; Nuez mozcada

Indigenous names:

Used by (3\*): Zoque<sup>01, 02, 03</sup>

Used for (14#): Digestive<sup>01, 02, 03</sup>; Musculoskeletal<sup>02</sup>; Psychological<sup>01, 03</sup>; Respiratory<sup>01</sup>; Skin<sup>02, 03</sup>; Pregnancy<sup>01, 03</sup>; Female genital<sup>03</sup>; General and Unspecified<sup>01, 03</sup>

Cognates:

Language contact:

### ***Myroxylon* (Apiaceae)**

Spanish names: Arbol de balsa; Balsamo de Peru; Bálsamo negro; Mirrha; Mirto

Indigenous names: Balsa cuy<sup>03</sup>; Uxum ts'ojol<sup>08</sup>

Used by (5\*): Zoque<sup>01, 03</sup>; Mixe<sup>04</sup>; Huastec<sup>08</sup>; Quichean Maya<sup>12</sup>

Used for (13#): Digestive<sup>08, 12</sup>; Ear<sup>08</sup>; Cardiovascular<sup>03</sup>; Musculoskeletal<sup>03, 04</sup>; Neurological<sup>08</sup>; Respiratory<sup>12</sup>; Skin<sup>03, 08</sup>; General and Unspecified<sup>01, 04, 12</sup>

Cognates:

Language contact:

### ***Nasturtium* (Brassicaceae)**

Spanish names: Berro

Indigenous names: Uwi suk', chaj patre<sup>13</sup>

Used by (4\*): Zoque<sup>03</sup>; Totonac<sup>06</sup>; Quichean Maya<sup>13</sup>; Zapotec<sup>21</sup>

Used for (11#): Blood<sup>06, 13</sup>; Digestive<sup>06, 21</sup>; Eye<sup>13</sup>; Respiratory<sup>06, 13</sup>; Skin<sup>03</sup>; General and Unspecified<sup>06, 13, 21</sup>

Cognates:

Language contact:

### ***Nectandra* (Lauraceae)**

Spanish names: Laurel

Indigenous names: Ohte<sup>07</sup>; Chajom Che<sup>14</sup>; Ahuacachile<sup>24</sup>

Used by (4\*): Huastec<sup>07</sup>; Quichean Maya<sup>14</sup>; Nahua<sup>24, 26</sup>

Used for (5#): Digestive<sup>07, 14</sup>; Psychological<sup>26</sup>; Skin<sup>07</sup>; Pregnancy<sup>24</sup>

Cognates:

Language contact:

### ***Neea* (Nyctaginaceae)**

Spanish names:

Indigenous names: Tsabats masan ay<sup>03</sup>; K'ak'al xeklek, k'ak'al ilaal<sup>07</sup>; Xtatsim<sup>09</sup>

Used by (3\*): Zoque<sup>03</sup>; Huastec<sup>07</sup>; Yucatecan Maya<sup>09</sup>

Used for (4#): Skin<sup>03, 09</sup>; General and Unspecified<sup>03, 07</sup>

Cognates:

Language contact:

### ***Neomillspaughia* (Polygonaceae)**

Spanish names:

Indigenous names: Sakitsa', Xtastabin<sup>09</sup>

Used by (1\*): Yucatecan Maya<sup>09</sup>

Used for (2#): Respiratory<sup>09</sup>; Skin<sup>09</sup>

Cognates:

Language contact:

### ***Nephrolepis* (Nephrolepidaceae)**

Spanish names: Calahuala del Quetzal; Cola de Quetzal; Huechamacho

Indigenous names: Kalaguala Ruje'y Maq'uq<sup>12</sup>; Rix Ixul, Ch'upil Q'en<sup>14</sup>; Xqu'uq mo'coch<sup>16</sup>; Y qu'q moco'ch<sup>17</sup>

Used by (5\*): Quichean Maya<sup>12, 14, 16, 17</sup>; Nahua<sup>26</sup>

Used for (8#): Digestive<sup>12, 26</sup>; Neurological<sup>16</sup>; Psychological<sup>14</sup>; Skin<sup>14</sup>; General and Unspecified<sup>12, 14</sup>; nd<sup>17</sup>

Cognates:

Language contact:

### ***Nerium* (Apocynaceae)**

Spanish names: Clabel; Laurel

Indigenous names: Pitx mooya<sup>03</sup>

Used by (3\*): Zoque<sup>03</sup>; Zapotec<sup>21</sup>; Nahua<sup>28</sup>

Used for (7#): Musculoskeletal<sup>03</sup>; Neurological<sup>03</sup>; Respiratory<sup>21, 28</sup>; Skin<sup>21</sup>; Female genital<sup>21</sup>; General and Unspecified<sup>28</sup>

Cognates:

Language contact:

### ***Neurolaena* (Asteraceae)**

Spanish names: Cola de faisán; Crementina; Mano lagarto; Tres puntas; Tres puntas, mano de lagarto

Indigenous names: T'unu' ix bek'em<sup>07</sup>; Kayabim<sup>10</sup>; K'aman, c'a mank<sup>13</sup>; K'a' Mank<sup>14</sup>; Kamank, gan mank<sup>15</sup>; K'a mank<sup>17</sup>; Ch'ajch'aj k'opot<sup>19</sup>

Used by (11\*): Zoque<sup>02, 03</sup>; Huastec<sup>07</sup>; Yucatecan Maya<sup>10, 11</sup>; Quichean Maya<sup>13, 14, 15, 17</sup>; Western Maya<sup>19</sup>; Nahua<sup>26</sup>

Used for (19#): Digestive<sup>03, 14</sup>; Musculoskeletal<sup>14</sup>; Neurological<sup>19</sup>; Skin<sup>02, 03, 10, 11, 14, 26</sup>; Endocrine<sup>03</sup>; Pregnancy<sup>07</sup>; Female genital<sup>15</sup>; General and Unspecified<sup>03, 11, 13, 14, 19</sup>; nd<sup>17</sup>

Cognates: Quich: kamank;

Language contact: Quich <> Yuc

### ***Nicandra* (Solanaceae)**

Spanish names: Tomate de Ratón

Indigenous names:

Used by (1\*): Quichean Maya<sup>12</sup>

Used for (1#): Skin<sup>12</sup>

Cognates:

Language contact:

### ***Nicotiana* (Solanaceae)**

Spanish names: Puro; Tabaco; Tabaco (bobo/blanco); Tabaco (verde); Tabaco cimarron; Tabaquillo

Indigenous names: (Tzuj/ tzushy) ozi<sup>01</sup>; Tzä'wi<sup>02</sup>; Ts'ui<sup>03</sup>; Juiky<sup>04</sup>; Maay<sup>07</sup>; K'uts<sup>09</sup>; K'uuC<sup>10</sup>; Met', mee<sup>13</sup>; Mai, Xa'q Mai<sup>14</sup>; C'utz<sup>18</sup>; K'ujtz<sup>19</sup>; Moy, may, bankilal<sup>20</sup>; Guiass yeen<sup>21</sup>; Giasa'a<sup>21</sup>; Mostas<sup>22</sup>; Yäg-brêtâyn<sup>23</sup>; Bläg-guièz, bläg-tàbâcw<sup>23</sup>; Nenestlichihuitl<sup>28</sup>

Used by (18\*): Zoque<sup>01, 02, 03</sup>; Mixe<sup>04</sup>; Huastec<sup>07</sup>; Yucatecan Maya<sup>09, 10, 11</sup>; Quichean Maya<sup>13, 14</sup>; Western Maya<sup>18, 19, 20</sup>; Zapotec<sup>21, 22, 23</sup>; Nahuatl<sup>26, 28</sup>

Used for (66#): Digestive<sup>01, 20</sup>; Eye<sup>02</sup>; Ear<sup>01, 02, 03, 23</sup>; Cardiovascular<sup>07, 13</sup>; Musculoskeletal<sup>01, 14, 18, 19, 21, 23, 28</sup>; Neurological<sup>02, 11, 18, 19, 21, 22, 23, 28</sup>; Psychological<sup>01, 19, 20, 21</sup>; Respiratory<sup>01, 02, 10, 11, 13, 20, 21, 23</sup>; Skin<sup>01, 02, 03, 04, 07, 09, 11, 13, 14, 18, 21, 22, 26, 28</sup>; Pregnancy<sup>01, 13</sup>;

General and Unspecified<sup>01, 07, 13, 14, 19, 20, 21, 22, 23, 28</sup>

Cognates: Zoq: tsäwi; Maya: k'uts/mai; Yuc: k'uts; Quich: mai/me; WesM: k'uts; Zap: gas;

Language contact:

### ***Niphidium* (Polypodiaceae)**

Spanish names: Oreja de burro

Indigenous names: Burru tatzo<sup>01</sup>

Used by (1\*): Zoque<sup>01</sup>

Used for (1#): Digestive<sup>01</sup>

Cognates:

Language contact:

### ***Nissolia* (Fabaceae)**

Spanish names:

Indigenous names: Bo' xeke<sup>07</sup>; Xk'ant'uul<sup>09</sup>

Used by (2\*): Huastec<sup>07</sup>; Yucatecan Maya<sup>09</sup>

Used for (4#): Neurological<sup>07</sup>; Skin<sup>07, 09</sup>; General and Unspecified<sup>07</sup>

Cognates:

Language contact:

### ***Nopalea* (Cactaceae)**

Spanish names: Nopal; Nopal, Tuna; Nopallilo

Indigenous names: Nakpat<sup>01</sup>; Kum pasyte<sup>02</sup>; Taat<sup>04</sup>; Aa'xilh<sup>06</sup>; Pak'ak<sup>07</sup>; Pak'ak<sup>08</sup>; Pak'am<sup>09</sup>; Vaas pim<sup>14</sup>; Bia'aj<sup>21</sup>; Yäg-biäa<sup>23</sup>

Used by (14\*): Zoque<sup>01, 02, 03</sup>; Mixe<sup>04</sup>; Totonac<sup>06</sup>; Huastec<sup>07, 08</sup>; Yucatecan Maya<sup>09</sup>; Quichean Maya<sup>12, 14</sup>; Zapotec<sup>21, 23</sup>; Nahuatl<sup>24, 27</sup>

Used for (47#): Blood<sup>03</sup>; Digestive<sup>01, 07, 12, 14, 21, 23</sup>; Cardiovascular<sup>01, 02, 08</sup>; Musculoskeletal<sup>01, 02, 08, 14, 21</sup>; Neurological<sup>01</sup>; Respiratory<sup>01, 06, 09, 21</sup>; Skin<sup>01, 02, 07, 08, 14, 23</sup>; Endocrine<sup>01, 02, 06, 08, 12, 21, 27</sup>; Urological<sup>01, 02, 09, 12</sup>; Pregnancy<sup>04, 07, 24</sup>; Female genital<sup>01, 12</sup>; General and Unspecified<sup>03, 12, 14, 21</sup>

Cognates: MZ: at; Zoq: pat/paxt; Maya: pak; Hua: pak'ak; Zap: bia'a;

Language contact: Zoq <> Maya

### ***Nymphaea* (Nymphaeaceae)**

Spanish names: Laguna; Repollo

Indigenous names: Pulu<sup>07</sup>; Ch'oop Q'ehen<sup>14</sup>; Laguna<sup>18</sup>

Used by (3\*): Huastec<sup>07</sup>; Quichean Maya<sup>14</sup>; Western Maya<sup>18</sup>

Used for (4#): Neurological<sup>07</sup>; Skin<sup>18</sup>; Pregnancy<sup>14</sup>; General and Unspecified<sup>07</sup>

Cognates:

Language contact:

### ***Ocimum* (Lamiaceae)**

Spanish names: Albahaca; Albahaca (cimarrona); Albahaca de monte; Albahaca de tierra; Albahaca morada; albahaca negra/morada; Albahaca simaron; Albahaca simarron/pimentillo; Albahaca, basilica, calamento, hierba real; Albahacar; Especie cimarrón; Hoja de cólico/hierba santa marta/ hierba de cólico; Oregano; Oregano de castill; Oreja, Orégano Castillo; Siempreviva; Tepocía

Indigenous names: Tung an petkuy/tzukspa' tane/näk tane/ tzukin jäyä/yäjkuy tane<sup>01</sup>; Tzukspa'tane<sup>01</sup>; Nas moki pa'a/ moki une<sup>01</sup>; Ay jäyä<sup>02</sup>; Ukä ay jäyä<sup>02</sup>; Xuuik<sup>04</sup>; Paxuuk<sup>04</sup>; Paxcahujnuk<sup>05</sup>; Tsin thekw'eel, chithan thekw'eel, thuutsub,<sup>07</sup>; Laab thekw'eel<sup>07</sup>; Ik ts'ohool<sup>07</sup>; Lap thekw'eel<sup>08</sup>; Xkakaltun<sup>09</sup>; Xtem Qana<sup>14</sup>; Obej<sup>15</sup>; benq<sup>15</sup>; Albajaka<sup>18</sup>; Xuch pä mimi<sup>18</sup>; Chitam wamal, poxil ik', bakel chitam, tza'los wamal, san mikel wamal, ch'aal wamal, yax wamal, xulem te<sup>20</sup>; Guiasharu'uj<sup>21</sup>; Talachía<sup>24</sup>; Sordoxihuite<sup>26</sup>

Used by (25\*): Zoque<sup>01, 02, 03</sup>; Mixe<sup>04</sup>; Totonac<sup>05</sup>; Huastec<sup>07, 08</sup>; Yucatecan Maya<sup>09, 10, 11</sup>; Quichean Maya<sup>12, 13, 14, 15</sup>; Western Maya<sup>18, 19, 20</sup>; Zapotec<sup>21, 22, 23</sup>; Nahua<sup>24, 25, 26, 27, 28</sup>

Used for (137#): Blood<sup>01</sup>; Digestive<sup>01, 02, 03, 05, 07, 08, 09, 11, 12, 13, 18, 19, 20, 21, 25, 26, 27, 28</sup>; Eye<sup>01, 02, 03, 09, 10, 11, 18, 19</sup>; Ear<sup>01, 02, 03, 04, 13, 14, 19, 23</sup>; Cardiovascular<sup>01, 02, 08, 25</sup>; Musculoskeletal<sup>01, 02, 05, 08, 12, 18, 20, 21</sup>; Neurological<sup>01, 02, 03, 07, 08, 09, 11, 12, 13, 18, 23, 25, 26</sup>; Psychological<sup>01, 05, 07, 12, 21</sup>; Respiratory<sup>01, 02, 03, 08, 18, 20, 25, 27, 28</sup>; Skin<sup>01, 02, 04, 08, 09, 12, 26</sup>; Endocrine<sup>02</sup>; Urological<sup>02, 12</sup>; Pregnancy<sup>02, 03, 05, 08, 19, 24, 26</sup>; Female genital<sup>01, 02, 03, 05, 12, 15, 19, 21</sup>; General and Unspecified<sup>01, 02, 03, 04, 05, 07, 08, 12, 13, 14, 18, 21, 22, 23, 25, 26, 27</sup>

Cognates: Hua: thekw'eel;

Language contact: Chiapas Zoq <> Tot; Mixe <> Tot <> Yuc; Tot <> Tzeltalan

### ***Ocotea* (Lauraceae)**

Spanish names: Laurel Negro; Laurelillo; Rosa negra

Indigenous names: Moko<sup>03</sup>; Chuch moko<sup>03</sup>

Used by (1\*): Zoque<sup>03</sup>

Used for (6#): Digestive<sup>03</sup>; Cardiovascular<sup>03</sup>; Skin<sup>03</sup>; Female genital<sup>03</sup>

Cognates:

Language contact:

### ***Odontonema* (Acanthaceae)**

Spanish names: Hoja de llanto; Hoja de paperón

Indigenous names: Naktam ay<sup>03</sup>; T'a'lom ts'ohool, k'alul ts'ohool<sup>07</sup>; Sam Ajtzo<sup>14</sup>; Kux' Luq' Salaq' Baqel', Sam Ajtzo<sup>14</sup>; Yopo uq'ue<sup>18</sup>

Used by (5\*): Zoque<sup>01, 03</sup>; Huastec<sup>07</sup>; Quichean Maya<sup>14</sup>; Western Maya<sup>18</sup>

Used for (13#): Digestive<sup>01</sup>; Ear<sup>03</sup>; Musculoskeletal<sup>03, 14</sup>; Neurological<sup>14</sup>; Respiratory<sup>03</sup>; Skin<sup>03</sup>; General and Unspecified<sup>07, 14, 18</sup>

Cognates:

Language contact:

### ***Oeceoclades* (Orchidaceae)**

Spanish names: Espalda de la Culebra, Curarina

Indigenous names: Rix li kanti, Xb'an Xmay Ixul<sup>14</sup>

Used by (1\*): Quichean Maya<sup>14</sup>

Used for (2#): Skin<sup>14</sup>; General and Unspecified<sup>14</sup>

Cognates:

Language contact:

### ***Oecopetalum* (Icnicaceae)**

Spanish names: Cacate

Indigenous names: Kuk yaka/ kuckyak kawak/ kokya kawa<sup>01</sup>

Used by (1\*): Zoque<sup>01</sup>

Used for (3#): Digestive<sup>01</sup>; Psychological<sup>01</sup>; Endocrine<sup>01</sup>

Cognates:

Language contact:



### ***Oenothera* (Onagraceae)**

Spanish names: Hierba azar de mata/hierba de antojo/ hoja de azar fría; Hierba cólica; Hierba del golpe; Hierbita de pollo; Saramella; Tomillo de Montaña

Indigenous names: Tzate kä tane/ pu tzäpäsy häyä/ tz'a tat käyi tane<sup>01</sup>; Piiquaa't xanat<sup>06</sup>; Waakal mo'eel<sup>07</sup>; Waakal mo'eel, thamuul wich<sup>07</sup>; Ts'een waakal mo'eel<sup>07</sup>; Ist'een wakal mo'el<sup>08</sup>; Tomi'y Aq'om K'echelaj<sup>12</sup>; Guièe-zhàn-biäa<sup>23</sup>; Coxcatlacuache<sup>26</sup>; Cupachocotl<sup>28</sup>

Used by (9\*): Zoque<sup>01</sup>; Totonac<sup>06</sup>; Huastec<sup>07, 08</sup>; Quichean Maya<sup>12</sup>; Zapotec<sup>23</sup>; Nahua<sup>25, 26, 28</sup>

Used for (31#): Blood<sup>06</sup>; Digestive<sup>07, 12, 25, 26, 28</sup>; Musculoskeletal<sup>07, 08</sup>; Neurological<sup>23, 25</sup>; Psychological<sup>07</sup>; Respiratory<sup>12, 23, 25</sup>; Skin<sup>06, 08, 25, 26, 28</sup>; Urological<sup>26</sup>; Female genital<sup>26</sup>; General and Unspecified<sup>01, 06, 07, 08, 12, 23, 25</sup>

Cognates:

Language contact:

### ***Olea* (Oleaceae)**

Spanish names: Aceituna; Olivo

Indigenous names:

Used by (2\*): Quichean Maya<sup>12, 13</sup>

Used for (3#): Digestive<sup>12</sup>; Pregnancy<sup>13</sup>; General and Unspecified<sup>13</sup>

Cognates:

Language contact:

### ***Olyra* . (Poaceae)**

Spanish names:

Indigenous names: Xuwan Q'ehen<sup>14</sup>

Used by (1\*): Quichean Maya<sup>14</sup>

Used for (1#): Female genital<sup>14</sup>

Cognates:

Language contact:

### ***Oncidium* (Orchidaceae)**

Spanish names: Cola de raton; Orquidea

Indigenous names: Tsuk i tyutsu<sup>03</sup>; Oxib Xjuruch<sup>14</sup>

Used by (3\*): Zoque<sup>02, 03</sup>; Quichean Maya<sup>14</sup>

Used for (6#): Ear<sup>03</sup>; Respiratory<sup>02</sup>; Skin<sup>03, 14</sup>; Female genital<sup>03, 14</sup>

Cognates:

Language contact:

### ***Operculina* (Convolvulaceae)**

Spanish names:

Indigenous names: Pok' laak, akan tsok<sup>07</sup>; Rixihij li mis<sup>14</sup>

Used by (2\*): Huastec<sup>07</sup>; Quichean Maya<sup>14</sup>

Used for (5#): Digestive<sup>07</sup>; Musculoskeletal<sup>14</sup>; Neurological<sup>07</sup>; Skin<sup>07</sup>; General and Unspecified<sup>07</sup>

Cognates:

Language contact:

### ***Oplismenus* (Poaceae)**

Spanish names:

Indigenous names: Ts'aahil tsan, chukul bat'aw, lakab huchuul, ts'aahil kw'a', tsakam tsahib<sup>07</sup>

Used by (1\*): Huastec<sup>07</sup>

Used for (1#): General and Unspecified<sup>07</sup>

Cognates:

Language contact:

### ***Opuntia* (Cactaceae)**

Spanish names: Nopal

Indigenous names: Pak'ak, k'aan k'iith, thiman pak'ak, bohol pak'ak<sup>07</sup>; Nach'te, nich'te, nachti<sup>13</sup>; Yop'nopal<sup>18</sup>; Yäg-biäa<sup>23</sup>

Used by (5\*): Huastec<sup>07</sup>; Quichean Maya<sup>13</sup>; Western Maya<sup>18</sup>; Zapotec<sup>23</sup>; Nahua<sup>25</sup>

Used for (15#): Digestive<sup>07, 18, 23</sup>; Musculoskeletal<sup>07</sup>; Respiratory<sup>07, 13, 18, 25</sup>; Skin<sup>07, 13, 23</sup>; Endocrine<sup>18, 25</sup>; General and Unspecified<sup>07, 13</sup>

Cognates:

Language contact:

### ***Oreopanax* (Araliaceae)**

Spanish names: Palo de agua

Indigenous names:

Used by (1\*): Nahua<sup>26</sup>

Used for (1#): Respiratory<sup>26</sup>

Cognates:

Language contact:

### ***Origanum* (Lamiaceae)**

Spanish names: Oregano

Indigenous names:

Used by (1\*): Zapotec<sup>21</sup>

Used for (1#): General and Unspecified<sup>21</sup>

Cognates:

Language contact:

### ***Origanum* (Lamiaceae)**

Spanish names: Mejorana; Oregano; Oregano de comida; Oregano, mejorana

Indigenous names: Mehorana<sup>07</sup>; Tsiimal koy<sup>08</sup>

Used by (10\*): Zoque<sup>01, 02</sup>; Totonac<sup>06</sup>; Huastec<sup>07, 08</sup>; Yucatecan Maya<sup>09</sup>; Quichean Maya<sup>12</sup>; Zapotec<sup>22</sup>; Nahua<sup>25, 26</sup>

Used for (29#): Digestive<sup>01, 02, 06, 08, 12, 22, 26</sup>; Musculoskeletal<sup>08, 12</sup>; Neurological<sup>02, 08, 12</sup>; Psychological<sup>06, 08, 12, 26</sup>; Respiratory<sup>06, 08, 12</sup>; Urological<sup>12</sup>; Pregnancy<sup>09, 26</sup>; Female genital<sup>02, 06, 12, 26</sup>; General and Unspecified<sup>01, 07, 25</sup>

Cognates:

Language contact:

### ***Ormosia* (Fabaceae)**

Spanish names: Coral

Indigenous names: May cuy<sup>03</sup>

Used by (1\*): Zoque<sup>03</sup>

Used for (2#): Pregnancy<sup>03</sup>; Female genital<sup>03</sup>

Cognates:

Language contact:

### ***Ornithocephalus* (Orchidaceae)**

Spanish names:

Indigenous names: X-xi' Mukuy<sup>14</sup>

Used by (1\*): Quichean Maya<sup>14</sup>

Used for (2#): Skin<sup>14</sup>; General and Unspecified<sup>14</sup>

Cognates:

Language contact:

### ***Orthrosanthus* (Iridaceae)**

Spanish names: Palma Morada; Petate de ratón

Indigenous names: Aq'om Kotz'ij<sup>12</sup>; Pop chó<sup>13</sup>; Xmes hi' ha<sup>14</sup>

Used by (3\*): Quichean Maya<sup>12, 13, 14</sup>

Used for (3#): Digestive<sup>12</sup>; Respiratory<sup>14</sup>; Female genital<sup>13</sup>

Cognates:

Language contact:

### ***Oryctanthus* (Loranthaceae)**

Spanish names:

Indigenous names: Ne'ba pim<sup>16</sup>

Used by (1\*): Quichean Maya<sup>16</sup>

Used for (1#): Psychological<sup>16</sup>

Cognates:

Language contact:

### ***Oryza* (Poaceae)**

Spanish names: Arroz

Indigenous names:

Used by (5\*): Zoque<sup>01, 02</sup>; Mixe<sup>04</sup>; Quichean Maya<sup>12</sup>; Zapotec<sup>21</sup>

Used for (7#): Digestive<sup>01, 02, 04, 21</sup>; Musculoskeletal<sup>01</sup>; General and Unspecified<sup>12, 21</sup>

Cognates:

Language contact:

### ***Osmunda* (Osmundaceae)**

Spanish names: Helecho real

Indigenous names:

Used by (1\*): Quichean Maya<sup>13</sup>

Used for (1#): Musculoskeletal<sup>13</sup>

Cognates:

Language contact:

### ***Ostrya* (Betulaceae)**

Spanish names: Encino niño/roble enano

Indigenous names: Une kamay/ tzut kamay<sup>01</sup>

Used by (1\*): Zoque<sup>01</sup>

Used for (2#): Digestive<sup>01</sup>; Respiratory<sup>01</sup>

Cognates:

Language contact:

### ***Oxalis* (Oxalidaceae)**

Spanish names: Calzoncillo de Agua, Trebol silvestre; Capulin blanco; Hierba de Chicha, Trebolillo amarillo; Hierba de sentimiento, hierba de pesar; Hoja de azar; Tamarindillo, monte de preñiz; Trebol; Trebol, acederill, aleluya, vinagrio

Indigenous names: Tza'a tzoj<sup>01</sup>; Pixtic sotyi<sup>03</sup>; Paxum<sup>04</sup>; Hilil ts'ohool, otsom ichiich, t'i'kom ichiich<sup>07</sup>; Kital ichiich<sup>07</sup>; Elel<sup>09</sup>; Q'ais ch'am, Q'en Lotz Aq'om<sup>12</sup>; Lost, Oxi' Ruxaq Q'os<sup>12</sup>; Kieq lotz<sup>13</sup>; Lotz<sup>13</sup>; Ajsyan k'opot, pajpaj k'opot<sup>19</sup>; Guizh-bdiò-guix, xín-guièe-bè, guizh-bè-làs<sup>23</sup>

Used by (10\*): Zoque<sup>01, 03</sup>; Mixe<sup>04</sup>; Huastec<sup>07</sup>; Yucatecan Maya<sup>09, 11</sup>; Quichean Maya<sup>12, 13</sup>; Western Maya<sup>19</sup>; Zapotec<sup>23</sup>

Used for (42#): Blood<sup>12</sup>; Digestive<sup>04, 07, 12, 13, 19, 23</sup>; Eye<sup>12</sup>; Cardiovascular<sup>12</sup>; Musculoskeletal<sup>12</sup>; Neurological<sup>01, 12</sup>;

Psychological<sup>03, 12</sup>; Respiratory<sup>13</sup>; Skin<sup>01, 03, 07, 09, 11, 12, 13</sup>; Urological<sup>03</sup>; Pregnancy<sup>03</sup>; Female genital<sup>12</sup>; General and Unspecified<sup>01, 03, 07, 09, 11, 12</sup>

Cognates: Quich: lotz;

Language contact: Hua <> Yuc

### ***Oxyrhynchus* (Fabaceae)**

Spanish names:

Indigenous names: Wal pooy<sup>07</sup>

Used by (1\*): Huastec<sup>07</sup>

Used for (1#): Eye<sup>07</sup>

Cognates:

Language contact:

### ***Pachira* (Malvaceae)**

Spanish names: Apompo; Bonete; Palo de agua; Santa Domingo; Zapote de agua; Zapote de laguna

Indigenous names: Uwakta<sup>01</sup>; Uakta<sup>03</sup>; Ka'pa<sup>05</sup>; K'unche', K'uyche<sup>09</sup>; Sapote bobo<sup>10</sup>; Ajp'o tec<sup>18</sup>

Used by (6\*): Zoque<sup>01, 03</sup>; Totonac<sup>05</sup>; Yucatecan Maya<sup>09, 10</sup>; Western Maya<sup>18</sup>

Used for (9#): Digestive<sup>18</sup>; Eye<sup>18</sup>; Skin<sup>05</sup>; Endocrine<sup>01, 03, 18</sup>; Urological<sup>03, 10</sup>; General and Unspecified<sup>09</sup>

Cognates: Zoq: u(w)akta;

Language contact:

### ***Pachyrhizus* (Fabaceae)**

Spanish names: Jicama

Indigenous names: Kobeem<sup>07</sup>; Kup<sup>09</sup>

Used by (2\*): Huastec<sup>07</sup>; Yucatecan Maya<sup>09</sup>

Used for (2#): Respiratory<sup>09</sup>; Skin<sup>07</sup>

Cognates: Maya: kob/kup;

Language contact:

### ***Panicum* (Poaceae)**

Spanish names:

Indigenous names: Itse' toom<sup>07</sup>

Used by (1\*): Huastec<sup>07</sup>

Used for (1#): Respiratory<sup>07</sup>

Cognates:

Language contact:

### ***Parathesis* (Primulaceae)**

Spanish names: Llorasangre, Corazón de la Selva

Indigenous names: Chu cuxamñi<sup>03</sup>; Apulee', ebha<sup>07</sup>; Ruk'uch Juyu<sup>12</sup>; Tilil ja<sup>20</sup>

Used by (4\*): Zoque<sup>03</sup>; Huastec<sup>07</sup>; Quichean Maya<sup>12</sup>; Western Maya<sup>20</sup>

Used for (16#): Blood<sup>12</sup>; Digestive<sup>03, 07, 12, 20</sup>; Cardiovascular<sup>12</sup>; Musculoskeletal<sup>12</sup>; Psychological<sup>12</sup>; Respiratory<sup>12</sup>; Endocrine<sup>12</sup>; Urological<sup>12</sup>; Female genital<sup>03</sup>; General and Unspecified<sup>07, 12</sup>

Cognates:

Language contact:

### ***Parmentiera* (Bignoniaceae)**

Spanish names: Chote, cuajilote; Cuajilote; Guajilote; Pepino cat; Platano espina, uña de tigre

Indigenous names: Apit kuy<sup>01</sup>; Paka'ak<sup>04</sup>; Pusni, puxni<sup>05</sup>; Pux'nit<sup>06</sup>; Tsoote<sup>07</sup>; Kat<sup>09</sup>; Katche<sup>09</sup>; Cho'te<sup>18</sup>; Biguaj guedxii<sup>21</sup>;

Cuaxilotl<sup>28</sup>

Used by (11\*): Zoque<sup>01, 02, 03</sup>; Mixe<sup>04</sup>; Totonac<sup>05, 06</sup>; Huastec<sup>07</sup>; Yucatecan Maya<sup>09</sup>; Western Maya<sup>18</sup>; Zapotec<sup>21</sup>; Nahua<sup>28</sup>

Used for (39#): Digestive<sup>01, 05, 07</sup>; Ear<sup>05, 06, 07, 18</sup>; Neurological<sup>05</sup>; Respiratory<sup>01, 02, 03, 04, 05, 07, 18, 21</sup>; Skin<sup>07</sup>; Endocrine<sup>05, 06, 09, 18, 28</sup>;

Urological<sup>05, 06, 07, 09, 18, 28</sup>; Pregnancy<sup>03, 05</sup>; Female genital<sup>03</sup>; Male genital<sup>01</sup>; General and Unspecified<sup>02, 05, 07, 18, 28</sup>

Cognates: Tot: puxni; Maya: tsoote/choote;

Language contact:

### ***Parthenium* (Asteraceae)**

Spanish names: Altamisa; Altamisa, cilantrillo; Hierba maestra/velo de reina/ estrella; Marijuana cimarron; Sicutía

Indigenous names: Tzaj'u pu, ma'tza jäyá<sup>01</sup>; Pa artemis, artemis ujts<sup>04</sup>; Ts'a'il kw'eet, kaxiy kw'eet<sup>07</sup>; Cilantro Ši'u<sup>10</sup>;

Corriente Ši'u<sup>10</sup>

Used by (9\*): Zoque<sup>01, 03</sup>; Mixe<sup>04</sup>; Huastec<sup>07</sup>; Yucatecan Maya<sup>09, 10, 11</sup>; Western Maya<sup>18</sup>; Zapotec<sup>21</sup>

Used for (25#): Blood<sup>10</sup>; Digestive<sup>07, 18</sup>; Cardiovascular<sup>01</sup>; Musculoskeletal<sup>01, 03, 04, 07, 18, 21</sup>; Respiratory<sup>01</sup>; Skin<sup>01, 07, 21</sup>;

Endocrine<sup>01, 03</sup>; Pregnancy<sup>07</sup>; Female genital<sup>09</sup>; General and Unspecified<sup>01, 04, 07, 09, 10, 11, 21</sup>

Cognates:

Language contact:

### ***Paspalum* (Poaceae)**

Spanish names: Zacate grama

Indigenous names: So'ok<sup>01</sup>

Used by (2\*): Zoque<sup>01, 02</sup>

Used for (3#): Psychological<sup>01</sup>; Urological<sup>01</sup>; General and Unspecified<sup>02</sup>

Cognates:

Language contact:

### ***Passiflora* (Passifloraceae)**

Spanish names: Ala de Muerciélago ; Ala de murciélago; Cachito rastrero, calzoncillo; Gagapachi; Granadilla; Granadilla de Culebra, Passiflora, Riñon de Montaña; Granadilla, Passiflora; Guaco; Jujito, top'o lac'; Maracuyá; Monte flución, monte preñiz; Passiflora; Pepe; Pepe, passiflora, granadita

Indigenous names: Tzi pono<sup>01</sup>; Xiu tiepo<sup>03</sup>; Tanto'xy<sup>04</sup>; Sindi sprun, sandia spuun<sup>06</sup>; Okoob thut<sup>07</sup>; Pok'pok', owel paat, tsakam hiliy<sup>07</sup>; Xik'sots<sup>09</sup>; Xpoch<sup>09</sup>; Šik'sooç<sup>10</sup>; Cruz Q'an, Aq'om Q'ayis Riñon<sup>12</sup>; Aq'om Kowil Q'os Ka<sup>12</sup>; Rismal ru' qanyaj, Xik'isotz<sup>14</sup>; Tú' kej<sup>14</sup>; Xik'isotz<sup>14</sup>; Tu' kej<sup>14</sup>; Granadillo y Cho' Ho<sup>14</sup>; Roq' Maus aj' Winq<sup>14</sup>; Choq'l pim<sup>14</sup>; Tu'kej<sup>16</sup>; Tu' kej<sup>17</sup>; Juju<sup>18</sup>; Pa'ch'em, julusyon k'opot<sup>19</sup>; Wapapa<sup>21</sup>; Ibæ-grânâd, guizh-grânâd, grânâd-dán<sup>23</sup>

Used by (18\*): Zoque<sup>01, 02, 03</sup>; Mixe<sup>04</sup>; Totonac<sup>05, 06</sup>; Huastec<sup>07</sup>; Yucatecan Maya<sup>09, 10</sup>; Quichean Maya<sup>12, 14, 16, 17</sup>; Western Maya<sup>18, 19</sup>; Zapotec<sup>21, 23</sup>; Nahuatl<sup>28</sup>

Used for (90#): Blood<sup>05, 12</sup>; Digestive<sup>02, 07, 12, 14, 21, 28</sup>; Eye<sup>03</sup>; Ear<sup>07, 09</sup>; Cardiovascular<sup>02, 18, 28</sup>; Musculoskeletal<sup>12, 19</sup>; Neurological<sup>01, 07, 12, 14, 16, 19, 23, 28</sup>; Psychological<sup>01, 02, 03, 12, 18, 21</sup>; Respiratory<sup>02, 12, 14</sup>; Skin<sup>02, 03, 07, 09, 12, 14, 21</sup>; Endocrine<sup>02, 12</sup>; Urological<sup>02, 03, 04, 05, 06, 12, 14</sup>; Pregnancy<sup>07</sup>; Female genital<sup>03, 07, 18, 21</sup>; Male genital<sup>12, 14</sup>; Social problems<sup>14</sup>; General and Unspecified<sup>07, 10, 12, 14, 18, 19, 21</sup>; nd<sup>17</sup>

Cognates: CoreM: xik'sots; Yuc: xik'sots; Quich: tu'kej;

Language contact: Zap > Chimalapa Zoq via Spanish

### ***Paullinia* (Sapindaceae)**

Spanish names:

Indigenous names: Kꞑkujuki ay<sup>03</sup>; T'in kamab, tu kamaab<sup>07</sup>

Used by (2\*): Zoque<sup>03</sup>; Huastec<sup>07</sup>

Used for (12#): Digestive<sup>03, 07</sup>; Eye<sup>03</sup>; Skin<sup>03, 07</sup>; Endocrine<sup>07</sup>; Urological<sup>03</sup>; Pregnancy<sup>03, 07</sup>; Female genital<sup>03, 07</sup>

Cognates:

Language contact:

### ***Pavonia* (Malvaceae)**

Spanish names: Cadillo; Lengua de perro; Lengua de vaca

Indigenous names: Kam dane<sup>01</sup>; Konko<sup>03</sup>; Uk tuukats<sup>04</sup>; Ts'ikiy uxum, liin ts'ohool<sup>07</sup>; Mul Tzi<sup>14</sup>

Used by (6\*): Zoque<sup>01, 02, 03</sup>; Mixe<sup>04</sup>; Huastec<sup>07</sup>; Quichean Maya<sup>14</sup>

Used for (19#): Digestive<sup>01, 03, 07</sup>; Cardiovascular<sup>01</sup>; Musculoskeletal<sup>07</sup>; Neurological<sup>01</sup>; Respiratory<sup>07</sup>; Skin<sup>02, 03, 07, 14</sup>; Urological<sup>07</sup>; Pregnancy<sup>03, 07, 14</sup>; Female genital<sup>07</sup>; General and Unspecified<sup>04, 14</sup>

Cognates:

Language contact:

### ***Pecluma* (Polypodiaceae)**

Spanish names:

Indigenous names: Ehtil weew koxol<sup>07</sup>

Used by (2\*): Zoque<sup>03</sup>; Huastec<sup>07</sup>

Used for (3#): Digestive<sup>03</sup>; Neurological<sup>07</sup>; General and Unspecified<sup>03</sup>

Cognates:

Language contact:

### ***Pelargonium* (Geraniaceae)**

Spanish names: Geranio; Geranio (doméstico); Geranio (rojo); Geranio, solferino; Malva

Indigenous names: Guièe-jèrân<sup>23</sup>; Tlalalatl<sup>28</sup>

Used by (5\*): Zoque<sup>01</sup>; Quichean Maya<sup>12, 13</sup>; Zapotec<sup>23</sup>; Nahuatl<sup>28</sup>

Used for (10#): Blood<sup>12</sup>; Digestive<sup>13</sup>; Musculoskeletal<sup>01</sup>; Neurological<sup>01, 12</sup>; Respiratory<sup>12</sup>; Skin<sup>12, 23</sup>; Female genital<sup>28</sup>; General and Unspecified<sup>12</sup>

Cognates:

Language contact:

### ***Pellaea* (Pteridaceae)**

Spanish names:

Indigenous names: Ncuàan-dzéb<sup>23</sup>

Used by (1\*): Zapotec<sup>23</sup>

Used for (1#): General and Unspecified<sup>23</sup>

Cognates:

Language contact:

### ***Pennisetum* (Poaceae)**

Spanish names: Carizo

Indigenous names: Kape<sup>01</sup>; Pakaab<sup>07</sup>

Used by (2\*): Zoque<sup>01</sup>; Huastec<sup>07</sup>

Used for (4#): Skin<sup>01, 07</sup>; Urological<sup>01</sup>; General and Unspecified<sup>07</sup>

Cognates:

Language contact: Chiapas Zoq <> Hua

### ***Penstemon* (Plantaginaceae)**

Spanish names:

Indigenous names: Guièe-dzǐng, guìzh-guìe-dzǐng, guìzh-dzǐng, guìe-měets, guìe-mitsiě<sup>23</sup>

Used by (1\*): Zapotec<sup>23</sup>

Used for (2#): Skin<sup>23</sup>; General and Unspecified<sup>23</sup>

Cognates:

Language contact:

### ***Pentalinon* (Apocynaceae)**

Spanish names: Viperol verde

Indigenous names: Look' ts'aah<sup>07</sup>; Q'aru pim<sup>14</sup>

Used by (3\*): Huastec<sup>07</sup>; Yucatecan Maya<sup>09</sup>; Quichean Maya<sup>14</sup>

Used for (3#): Skin<sup>07, 09</sup>; Endocrine<sup>14</sup>

Cognates:

Language contact:

### ***Peperomia* (Piperaceae)**

Spanish names: Cristalillo; Hierba cristal; Hoja de Pescado; Ojo de Gato; Oreja de burro; Oreja de Cabro; Pata paloma; Pega huesos; Tarbatillo; Xoyoquelite

Indigenous names: Maj'a rane<sup>01</sup>; Kifi ay<sup>03</sup>; Conchuru ay, Epxi ay<sup>03</sup>; Chixchix ay<sup>03</sup>; Chicu tats<sup>03</sup>; Patsuxk juaxy<sup>04</sup>; Poj ujs<sup>04</sup>; Tsakam ix tuyuum<sup>07</sup>; Boton ts'ohool, wiyab ts'ohool, homte' ts'ohool<sup>07</sup>; Riqañ plamux<sup>13</sup>; Wiq'baq<sup>13</sup>; Rubel xsa' ixul<sup>14</sup>; Chak B'olay Q'eheñ, Mai pim, Leetzeb pim<sup>14</sup>; Ik B'olay Q'eheñ<sup>14</sup>; Xwa lxul, Xikyuk<sup>14</sup>; Se'ru Mes<sup>14</sup>; Se'ru Kar<sup>14</sup>; Chak B'olay Q'eheñ, Ik B'olay pim, Xwa lxul<sup>14</sup>; Xcua'aj aw chan<sup>16</sup>; X cua'i xul<sup>17</sup>; Tzetzetzi<sup>26</sup>

Used by (13\*): Zoque<sup>01, 02, 03</sup>; Mixe<sup>04</sup>; Totonac<sup>05</sup>; Huastec<sup>07</sup>; Quichean Maya<sup>13, 14, 16, 17</sup>; Western Maya<sup>18</sup>; Nahua<sup>25, 26</sup>

Used for (55#): Digestive<sup>14</sup>; Ear<sup>03</sup>; Musculoskeletal<sup>03, 13, 14</sup>; Neurological<sup>01, 07, 14, 16</sup>; Psychological<sup>16</sup>; Respiratory<sup>25</sup>; Skin<sup>01, 02, 03, 04, 07, 13, 14, 18, 26</sup>; Pregnancy<sup>05</sup>; Female genital<sup>14</sup>; General and Unspecified<sup>03, 04, 07, 14</sup>; nd<sup>17</sup>

Cognates: Quich: x(c)ua ixul;

Language contact:

### ***Pereskia* (Cactaceae)**

Spanish names:

Indigenous names: Pulik kwi'inal<sup>07</sup>

Used by (1\*): Huastec<sup>07</sup>

Used for (2#): Digestive<sup>07</sup>; Musculoskeletal<sup>07</sup>

Cognates:

Language contact:

### ***Pereskopsis* (Cactaceae)**

Spanish names:

Indigenous names: Kweteem kwi'inal<sup>07</sup>

Used by (1\*): Huastec<sup>07</sup>

Used for (3#): Digestive<sup>07</sup>; Respiratory<sup>07</sup>; General and Unspecified<sup>07</sup>

Cognates:

Language contact:

### ***Persea* (Lauraceae)**

Spanish names: Aguacate; Aguacate oloroso; Pagua

Indigenous names: Owi / Kuytäm / Kuytäp<sup>01</sup>; Kuy täm<sup>02</sup>; Cuy ty<sup>03</sup>; Kuit<sup>04</sup>; Kuka'taj<sup>05</sup>; Cutacaj<sup>06</sup>; XI'pu<sup>06</sup>; Uh, oh<sup>07</sup>; Uj<sup>08</sup>; On<sup>09</sup>; On<sup>10</sup>; Oj<sup>12</sup>; Oj<sup>13</sup>; Um<sup>18</sup>; Un<sup>19</sup>; On<sup>20</sup>; Yeexu'u<sup>21</sup>; Yäg-ngùd-guèx<sup>23</sup>; Aguacate<sup>25</sup>

Used by (21\*): Zoque<sup>01, 02, 03</sup>; Mixe<sup>04</sup>; Totonac<sup>05, 06</sup>; Huastec<sup>07, 08</sup>; Yucatecan Maya<sup>09, 10</sup>; Quichean Maya<sup>12, 13, 14</sup>; Western Maya<sup>18, 19, 20</sup>; Zapotec<sup>21, 23</sup>; Nahua<sup>24, 25, 26</sup>

Used for (91#): Blood<sup>05, 12</sup>; Digestive<sup>01, 02, 03, 04, 06, 07, 08, 13, 18, 19, 20, 21, 25</sup>; Eye<sup>21</sup>; Cardiovascular<sup>01, 02, 06, 08, 18, 21</sup>; Musculoskeletal<sup>01, 02, 03, 06, 08, 12, 13, 21</sup>; Neurological<sup>03, 08, 12</sup>; Psychological<sup>01, 06, 12, 18</sup>; Respiratory<sup>02, 05, 07, 08, 09, 10, 13, 19, 25, 26</sup>; Skin<sup>01, 02, 03, 06, 07, 08, 13, 18, 21, 25</sup>; Endocrine<sup>01, 03, 09, 12, 18</sup>; Urological<sup>01, 09, 12</sup>; Pregnancy<sup>02, 04, 06, 12, 13, 14, 19, 21, 23</sup>; Female genital<sup>01, 02, 03, 19, 24</sup>; Male genital<sup>01, 03, 18</sup>; General and Unspecified<sup>01, 05, 07, 08, 12, 14, 21, 25</sup>

Cognates: MZ: kuit; Zoq: kuitäm; Tot: kukataj; Maya: oj/on; Hua: oh/uh/uj; Yuc: on; Quich: oj; WesM: um/un/on; Nah: aguacatl;

Language contact: MZ > Tot; Mayan > Chiapas Zoq

### ***Persicaria* (Polygonaceae)**

Spanish names: Hoja de azar; Nueve Embarazo ; Pimienta de Agua

Indigenous names: Nø mo 'unts ujs<sup>04</sup>; Rukotz'ij chab'äk<sup>12</sup>; Beleeb' Q'eheñ<sup>14</sup>

Used by (4\*): Zoque<sup>01</sup>; Mixe<sup>04</sup>; Quichean Maya<sup>12, 14</sup>

Used for (8#): Digestive<sup>12</sup>; Musculoskeletal<sup>14</sup>; Skin<sup>04</sup>; Urological<sup>12</sup>; Pregnancy<sup>14</sup>; General and Unspecified<sup>01, 12, 14</sup>

Cognates:

Language contact:

### ***Peteravenia* (Asteraceae)**

Spanish names: Hierba de fiebre

Indigenous names: Nekx cuy<sup>03</sup>

Used by (2\*): Zoque<sup>01, 03</sup>

Used for (5#): Digestive<sup>01</sup>; Musculoskeletal<sup>01</sup>; Skin<sup>03</sup>; Female genital<sup>01</sup>; General and Unspecified<sup>01</sup>

Cognates:

Language contact:

### ***Petiveria* (Phytolaccaceae)**

Spanish names: Apacín; Apacina; Hierba del zorrillo; Hierba del zorro/hoja de zorro/ hierba de zorrillo; Hoja de zorrillo; Hoja de zorrillo/ hoja del zorro; Zorrillo, hoja de mal viento

Indigenous names: Wujpa ay/pats rane/ pats ay<sup>01</sup>; Patz ay/paks ay/ pats a'watz/jaka kätzok<sup>02</sup>; Patscang ay<sup>03</sup>; Paj ujts<sup>04</sup>; Pathaam, path ts'ohool, pathaam uut<sup>07</sup>; Pasim<sup>11</sup>; Paara Q'ehen<sup>14</sup>; Par'i'pim<sup>16</sup>; Tujen a'uch<sup>18</sup>; Bete'a<sup>21</sup>

Used by (13\*): Zoque<sup>01, 02, 03</sup>; Mixe<sup>04</sup>; Totonac<sup>05</sup>; Huastec<sup>07</sup>; Yucatecan Maya<sup>11</sup>; Quichean Maya<sup>12, 14, 16</sup>; Western Maya<sup>18, 19</sup>; Zapotec<sup>21</sup>

Used for (44#): Digestive<sup>01, 02, 03, 11, 14, 19, 21</sup>; Musculoskeletal<sup>01, 02, 03, 07, 14, 18, 21</sup>; Neurological<sup>02, 07, 11, 14, 16</sup>; Psychological<sup>16</sup>; Respiratory<sup>01, 02, 04, 12, 21</sup>; Skin<sup>03, 05, 07, 14, 21</sup>; Endocrine<sup>07</sup>; Urological<sup>01, 14</sup>; Pregnancy<sup>19</sup>; Female genital<sup>19</sup>; General and Unspecified<sup>01, 02, 03, 05, 07, 12, 14, 18, 21</sup>

Cognates: MZ: paj/pats; Zoq: pats; Maya: path/pas/par; Quich: par;

Language contact: MZ > Maya

### ***Petrea* (Verbenaceae)**

Spanish names: Comida de caballo; Flor de Nazareno; Raspasombrero

Indigenous names: Thathup tsâah, paaskwa wits, wayelom ts'ohool, kothow ch'aah<sup>07</sup>; Lat'ax xumplelab<sup>08</sup>; Yochop'tsimin<sup>09</sup>

Used by (4\*): Huastec<sup>07, 08</sup>; Yucatecan Maya<sup>09</sup>; Quichean Maya<sup>12</sup>

Used for (13#): Digestive<sup>08, 09</sup>; Musculoskeletal<sup>08</sup>; Neurological<sup>07</sup>; Psychological<sup>07</sup>; Respiratory<sup>07</sup>; Skin<sup>07, 12</sup>; Urological<sup>08</sup>; Pregnancy<sup>07</sup>; Female genital<sup>07</sup>; General and Unspecified<sup>07, 12</sup>

Cognates:

Language contact:

### ***Petroselinum* (Apiaceae)**

Spanish names: Perejil

Indigenous names: Parsil<sup>13</sup>

Used by (3\*): Totonac<sup>06</sup>; Quichean Maya<sup>13</sup>; Zapotec<sup>23</sup>

Used for (9#): Digestive<sup>06</sup>; Cardiovascular<sup>06</sup>; Neurological<sup>23</sup>; Respiratory<sup>23</sup>; Pregnancy<sup>13</sup>; Female genital<sup>06</sup>; Male genital<sup>13</sup>; General and Unspecified<sup>06, 23</sup>

Cognates:

Language contact:

### ***Peumus* (Monimiaceae)**

Spanish names: Boldo

Indigenous names:

Used by (2\*): Quichean Maya<sup>12</sup>; Zapotec<sup>21</sup>

Used for (7#): Blood<sup>12</sup>; Digestive<sup>12, 21</sup>; Psychological<sup>12</sup>; Skin<sup>12</sup>; Urological<sup>12</sup>; General and Unspecified<sup>12</sup>

Cognates:

Language contact:

### ***Phacelia* (Boraginaceae)**

Spanish names: Milenrama de Agua

Indigenous names: Aq'om Kumatzin Q'os ya<sup>12</sup>

Used by (1\*): Quichean Maya<sup>12</sup>

Used for (4#): Digestive<sup>12</sup>; Cardiovascular<sup>12</sup>; Musculoskeletal<sup>12</sup>; Psychological<sup>12</sup>

Cognates:

Language contact:



### ***Phalaris* (Poaceae)**

Spanish names: Alpiste

Indigenous names:

Used by (2\*): Zoque<sup>02</sup>; Quichean Maya<sup>12</sup>

Used for (4#): Digestive<sup>12</sup>; Cardiovascular<sup>02</sup>; Skin<sup>12</sup>; General and Unspecified<sup>12</sup>

Cognates:

Language contact:

### ***Phaseolus* (Fabaceae)**

Spanish names: Frijol; Frijol blanco; Frijol negro

Indigenous names: Popo säk<sup>01</sup>; Sʔk<sup>03</sup>; Stapu<sup>06</sup>; Tsanakw', chanakw'<sup>07</sup>; Ik'ik bu'u<sup>18</sup>; Bizza'a<sup>21</sup>; Blă-dĭp, dzè-dĭp, bziàa-dĭp<sup>23</sup>

Used by (7\*): Zoque<sup>01, 03</sup>; Totonac<sup>06</sup>; Huastec<sup>07</sup>; Western Maya<sup>18</sup>; Zapotec<sup>21, 23</sup>

Used for (9#): Blood<sup>18, 21</sup>; Digestive<sup>07</sup>; Skin<sup>06, 21, 23</sup>; Pregnancy<sup>01, 03</sup>; General and Unspecified<sup>21</sup>

Cognates: Zoq: säk; Zap: bizza'a/bziaa;

Language contact: Zoq > Hua

### ***Phenax* (Urticaceae)**

Spanish names: Gordoncillo

Indigenous names:

Used by (1\*): Quichean Maya<sup>13</sup>

Used for (1#): Digestive<sup>13</sup>

Cognates:

Language contact:

### ***Philodendron* (Araceae)**

Spanish names: Bejuco Negro; Chapiz; Chapiz grande, malaste grande

Indigenous names: Toy'patek ay<sup>02</sup>; Pasmuj ay<sup>03</sup>; Marina ay<sup>03</sup>; Mututs<sup>03</sup>; Tantai<sup>05</sup>; Saq'i Jolol<sup>14</sup>; Ma'raq<sup>16</sup>; Par'i'pim<sup>16</sup>; Rubelsa'i'xul<sup>16</sup>

Used by (6\*): Zoque<sup>01, 02, 03</sup>; Totonac<sup>05</sup>; Huastec<sup>07</sup>; Yucatecan Maya<sup>09</sup>; Quichean Maya<sup>12, 13, 14, 16</sup>; Western Maya<sup>18, 19</sup>; Zapotec<sup>23</sup>; Nahua<sup>25</sup>

Used for (17#): Eye<sup>02, 03, 05</sup>; Cardiovascular<sup>14</sup>; Musculoskeletal<sup>03, 14</sup>; Neurological<sup>14, 16</sup>; Psychological<sup>16</sup>; Skin<sup>03, 05, 09, 14</sup>

Cognates:

Language contact:

### ***Phlebodium* (Polypodiaceae)**

Spanish names: Calagual, canaguala; Calaguala; Calaguala/Hierba de golpe; Calahuala; Costilla de león; Lengua de ciervo

Indigenous names: Misyu mätyik<sup>01</sup>; Ts'een k'ubak koy, talab ik,bo' waak<sup>07</sup>; K'ubak koy, akan koy, t'ot ts'ohool, k'ubak mitsu', akan wahuts, k'ubak pathaam<sup>07</sup>; Ruxe' Kalaguala Cha'at<sup>12</sup>; Ch'upil Q'en<sup>14</sup>; Lorom, u kab' mis<sup>19</sup>; Báz, guizh-báz<sup>23</sup>; Tehualcachitihuit<sup>25</sup>

Used by (10\*): Totonac<sup>05</sup>

Used for (30#): Digestive<sup>01, 12, 13, 23</sup>; Cardiovascular<sup>25</sup>; Musculoskeletal<sup>01, 05, 13, 18, 25</sup>; Neurological<sup>14</sup>; Respiratory<sup>01, 07, 23</sup>; Skin<sup>07, 18</sup>; Endocrine<sup>01, 13</sup>; Pregnancy<sup>07, 19</sup>; Female genital<sup>01, 19</sup>; Male genital<sup>01</sup>; General and Unspecified<sup>07, 12, 13, 23</sup>

Cognates:

Language contact: Chiapas Zoq <> Hua <> Chortí

### ***Phoradendron* (Santalaceae)**

Spanish names: Cabellera; Hierba amarilla; Mata palo; Muérdago; Muérdago, mata palo; Mundago/presta palo

Indigenous names: Kuy yakspa<sup>01</sup>; Cuyñukxi<sup>03</sup>; Palek aay<sup>04</sup>; Ok'lom te' yexu<sup>07</sup>; Tzara<sup>12</sup>; Tzara' geka<sup>12</sup>; Wik bak<sup>13</sup>; Shaguii nagitzi<sup>21</sup>

Used by (8\*): Zoque<sup>01, 03</sup>; Mixe<sup>04</sup>; Huastec<sup>07</sup>; Quichean Maya<sup>12, 13</sup>; Zapotec<sup>21</sup>; Nahua<sup>26</sup>

Used for (16#): Digestive<sup>12</sup>; Cardiovascular<sup>01, 12</sup>; Musculoskeletal<sup>13, 21</sup>; Neurological<sup>07</sup>; Psychological<sup>12</sup>; Skin<sup>03, 04, 12, 21</sup>; Endocrine<sup>26</sup>; General and Unspecified<sup>03, 12, 21</sup>

Cognates:

Language contact:

### ***Phragmites* (Poaceae)**

Spanish names: Caña de castilla

Indigenous names:

Used by (1\*): Quichean Maya<sup>13</sup>

Used for (1#): Urological<sup>13</sup>

Cognates:

Language contact:

### ***Phyla* (Verbenaceae)**

Spanish names: Hierba dulce; Hierba dulce, orozol, orozul, orozús, salvia santa; Hierba dulce, orozuz; Hierba dulce, té de abuela; Orozul/hierba dulce; Orozus; Orozus/santa lucia/verbena; Orozuz; Sorosir; Té de china; Yerba dulce

Indigenous names: Kanak pa'ak<sup>01</sup>; Cana ay<sup>03</sup>; Pa'ak ujts<sup>04</sup>; Sak'si'tuwan<sup>05</sup>; Tsi'iimal koy, chi'ik ch'ohool<sup>07</sup>; Orozús<sup>13</sup>; Q'iil

pim<sup>14</sup>; Bänälä tzaj<sup>18</sup>; Guixa'a na'axil<sup>21</sup>

Used by (17\*): Zoque<sup>01, 02, 03</sup>; Mixe<sup>04</sup>; Totonac<sup>05</sup>; Huastec<sup>07</sup>; Yucatecan Maya<sup>09</sup>; Quichean Maya<sup>12, 13, 14, 17</sup>; Western Maya<sup>18, 19</sup>;

Zapotec<sup>21, 22</sup>; Nahua<sup>25, 26</sup>

Used for (41#): Digestive<sup>01, 02, 03, 05, 07, 09, 21, 22, 25, 26</sup>; Neurological<sup>03, 13</sup>; Respiratory<sup>01, 02, 03, 04, 05, 07, 12, 13, 18, 19, 21</sup>; Skin<sup>07, 14</sup>;

Urological<sup>03, 12</sup>; Pregnancy<sup>03, 26</sup>; Female genital<sup>03, 05, 26</sup>; Male genital<sup>12</sup>; General and Unspecified<sup>07, 09, 12, 13, 14, 21</sup>; nd<sup>17</sup>

Cognates: MZ: pa'ak; Zoq: kana;

Language contact:

### ***Phyllanthus* (Phyllanthaceae)**

Spanish names: Hierba de piedrita/ quebra piedras/ romped piedra; Hierba del gusano; Mal de ojo; Zapote negro

Indigenous names: Poka rane<sup>01</sup>; Antuñik ay<sup>03</sup>; Kux ichiich, kital ichiich, waleklaab ichiich<sup>07</sup>; Pok' thoot<sup>07</sup>; Xulimil<sup>09</sup>; P'ix'ton-

ak<sup>09</sup>; Pets'k'mi, Kambaikiche<sup>09</sup>; P'ix'tonche<sup>09</sup>; Tleocuilpactle<sup>26</sup>; Tliltzapotl<sup>26</sup>; Axocopa<sup>26</sup>

Used by (5\*): Zoque<sup>01, 03</sup>; Huastec<sup>07</sup>; Yucatecan Maya<sup>09</sup>; Nahua<sup>26</sup>

Used for (22#): Digestive<sup>03, 07</sup>; Eye<sup>07</sup>; Neurological<sup>07, 09</sup>; Psychological<sup>03</sup>; Skin<sup>01, 07, 09, 26</sup>; Urological<sup>01, 09</sup>; Pregnancy<sup>26</sup>; Female

genital<sup>09</sup>; General and Unspecified<sup>03, 07</sup>

Cognates:

Language contact: Chiapas Zoq <> Hua <> Yuc

### ***Phymosia* (Malvaceae)**

Spanish names:

Indigenous names: Tsak kwiniimte<sup>107</sup>

Used by (1\*): Huastec<sup>07</sup>

Used for (1#): Digestive<sup>07</sup>

Cognates:

Language contact:

### ***Physalis* (Solanaceae)**

Spanish names: Chap'ulul; Costomate; Miltomate; Tomato de lombriz; Tomato verde; Tomatillo

Indigenous names: Koya tzäpe/ täksy kuy ay/ toksy koyak<sup>01</sup>; Naka txipiñ<sup>03</sup>; Chap'ulul<sup>06</sup>; Tuthaayil an t'ot<sup>07</sup>; Akal k'ak'al ilaal,

palat ichiich, tuthay te', walul ch'ohool<sup>07</sup>; Tudheyil t'ot<sup>08</sup>; Top tuč<sup>10</sup>; Joq pix<sup>13</sup>; Pe'y ch k'opot<sup>19</sup>; Bityuš giš<sup>22</sup>; Yàg-pchüux-làs,

pchüux-làs<sup>23</sup>

Used by (12\*): Zoque<sup>01, 03</sup>; Totonac<sup>06</sup>; Huastec<sup>07, 08</sup>; Yucatecan Maya<sup>10</sup>; Quichean Maya<sup>12, 13</sup>; Western Maya<sup>19</sup>; Zapotec<sup>22, 23</sup>;

Nahua<sup>27</sup>

Used for (32#): Digestive<sup>01, 06, 07, 08, 13, 19, 22</sup>; Ear<sup>07</sup>; Cardiovascular<sup>06</sup>; Neurological<sup>01</sup>; Respiratory<sup>01, 03, 06, 08, 13, 27</sup>; Skin<sup>03, 06, 07, 10, 12,</sup>

<sup>13, 23</sup>; Urological<sup>06</sup>; General and Unspecified<sup>07, 12, 22</sup>

Cognates: Hua: thuthVyil t'ot; Zap: pchux;

Language contact: Tot <> Hua; Yuc <> Chortí

### ***Phytolacca* (Phytolaccaceae)**

Spanish names: Hierba blanca, pie de palom tierno; Jaboncillo

Indigenous names: Tzakan<sup>01</sup>; Tzakanak<sup>02</sup>; Masan ay<sup>03</sup>; T'eikox<sup>09</sup>; Saltz'i' o Pek tz'i, Sa'l Tz'i Q'os<sup>12</sup>; Retz'e, raq'tze<sup>13</sup>

Used by (6\*): Zoque<sup>01, 02, 03</sup>; Yucatecan Maya<sup>09</sup>; Quichean Maya<sup>12, 13</sup>

Used for (11#): Blood<sup>13</sup>; Digestive<sup>12</sup>; Skin<sup>01, 02, 03, 12, 13</sup>; Urological<sup>12</sup>; General and Unspecified<sup>02, 09, 12</sup>

Cognates: Zoq: tzakan; CoreM: t'eikox/tz'i q'os;

Language contact:

### ***Picramnia* (Picramniaceae)**

Spanish names:

Indigenous names: J̄mniom petx maka<sup>03</sup>; Petx maka<sup>03</sup>; Thal te', k'inim te', thak oliy, tsakam it'il<sup>07</sup>

Used by (2\*): Zoque<sup>03</sup>; Huastec<sup>07</sup>

Used for (4#): Skin<sup>03, 07</sup>

Cognates:

Language contact:

### ***Pilea* (Urticaceae)**

Spanish names: Espumilla; Hoja de azar; Hoja de azar de hierbabuena

Indigenous names: Tza'a tzoy<sup>01</sup>; Txiñ txay sotyi<sup>03</sup>; Kiñi ay<sup>03</sup>; Ha'il tsan, tumiin ts'ohool, ohil tsan, pitsits wal<sup>07</sup>; Pux lat'em, kux laatem<sup>07</sup>; Tsakam tsahib<sup>07</sup>; Ox eek'il Q'eheh<sup>14</sup>

Used by (5\*): Zoque<sup>01, 03</sup>; Huastec<sup>07</sup>; Yucatecan Maya<sup>11</sup>; Quichean Maya<sup>14</sup>

Used for (19#): Eye<sup>07</sup>; Ear<sup>03</sup>; Musculoskeletal<sup>03</sup>; Neurological<sup>07</sup>; Respiratory<sup>07, 11</sup>; Skin<sup>03, 07</sup>; Urological<sup>11</sup>; Pregnancy<sup>07</sup>;

General and Unspecified<sup>01, 03, 07, 14</sup>

Cognates: Zoq: tsa/txa;

Language contact: Zoq > Hua

### ***Pilocarpus* (Rutaceae)**

Spanish names:

Indigenous names: Tamkasche', Siische<sup>09</sup>

Used by (1\*): Yucatecan Maya<sup>09</sup>

Used for (3#): Digestive<sup>09</sup>; Respiratory<sup>09</sup>; General and Unspecified<sup>09</sup>

Cognates:

Language contact:

### ***Pimenta* (Myrtaceae)**

Spanish names: Patololote, Pimienta gorda; Pimenton; Pimienta; Pimienta castilla; Pimienta de tabasco; Pimienta gorda; Pimienta grande

Indigenous names: Moki<sup>01</sup>; Moke<sup>02</sup>; Uk suk<sup>03</sup>; U'cum<sup>06</sup>; Nohochpol<sup>09</sup>; Naba kook<sup>10</sup>; Peen's<sup>14</sup>; Xuxpat<sup>18</sup>; Pimient rooj<sup>21</sup>

Used by (15\*): Zoque<sup>01, 02, 03</sup>; Mixe<sup>04</sup>; Totonac<sup>05, 06</sup>; Yucatecan Maya<sup>09, 10, 11</sup>; Quichean Maya<sup>12, 13, 14</sup>; Western Maya<sup>18, 19</sup>; Zapotec<sup>21</sup>

Used for (55#): Digestive<sup>01, 02, 03, 05, 06, 09, 10, 11, 12, 13, 18, 21</sup>; Ear<sup>01</sup>; Cardiovascular<sup>02</sup>; Musculoskeletal<sup>02, 06, 12, 18, 21</sup>; Neurological<sup>01, 02, 18</sup>; Psychological<sup>02</sup>; Respiratory<sup>01, 02, 03, 13, 18</sup>; Skin<sup>01, 03, 18, 21</sup>; Urological<sup>18</sup>; Pregnancy<sup>01, 02, 06, 09, 13, 14, 19, 21</sup>; Female genital<sup>01, 02, 03, 05, 09, 11, 19, 21</sup>; General and Unspecified<sup>01, 02, 04, 12, 13, 21</sup>

Cognates: Zoq: moki/e;

Language contact: Zoq > Tot

### ***Pimpinella* (Apiaceae)**

Spanish names: Anís

Indigenous names: Anix<sup>13</sup>

Used by (6\*): Zoque<sup>02</sup>; Totonac<sup>06</sup>; Yucatecan Maya<sup>09</sup>; Quichean Maya<sup>12, 13</sup>; Western Maya<sup>19</sup>

Used for (24#): Blood<sup>19</sup>; Digestive<sup>02, 06, 09, 13, 19</sup>; Musculoskeletal<sup>02, 12</sup>; Neurological<sup>12</sup>; Psychological<sup>02, 12, 13</sup>; Endocrine<sup>02</sup>;

Urological<sup>12</sup>; Pregnancy<sup>06, 09, 12, 13, 19</sup>; Female genital<sup>02, 12, 13</sup>; General and Unspecified<sup>12, 13</sup>

Cognates:

Language contact:

## ***Pinaropappus* (Asteraceae)**

Spanish names: Espule, espulga

Indigenous names: Guièe-mòràd, guìzh-mòràd, guìzh-nídz, ngùd-nídz, guìzh-rziòob], guìzh-guièt-ni<sup>23</sup>

Used by (2\*): Zapotec<sup>22, 23</sup>

Used for (3#): Eye<sup>23</sup>; Skin<sup>22, 23</sup>

Cognates:

Language contact:

## ***Pinguicula* (Lentibulariaceae)**

Spanish names: Trebol de Montaña

Indigenous names: Keq Treblo Aq'om<sup>12</sup>; Diàg-cùch, guìèe-ngùrùdz, guìèe-yòob-chèn<sup>23</sup>

Used by (2\*): Quichean Maya<sup>12</sup>; Zapotec<sup>23</sup>

Used for (8#): Blood<sup>12</sup>; Digestive<sup>12, 23</sup>; Neurological<sup>12</sup>; Psychological<sup>12</sup>; Respiratory<sup>12</sup>; Skin<sup>12</sup>; General and Unspecified<sup>12</sup>

Cognates:

Language contact:

## ***Pinus* (Pinaceae)**

Spanish names: Ocote; Ocote (colorado); Pino

Indigenous names: Tzin/tzit/ kon tzit/ tsapas koko'äng tzit<sup>01</sup>; Tzin<sup>02</sup>; Tyiñcuy<sup>03</sup>; Tsiin<sup>04</sup>; Pithomlaab<sup>07</sup>; Chäj<sup>12</sup>; Chaj<sup>13</sup>; Tajte<sup>19</sup>; Taj, k'an toj<sup>20</sup>; Guiere'ej<sup>21</sup>; Yàg-guièr<sup>23</sup>

Used by (11\*): Zoque<sup>01, 02, 03</sup>; Mixe<sup>04</sup>; Huastec<sup>07, 08</sup>; Quichean Maya<sup>12, 13, 14</sup>; Western Maya<sup>19, 20</sup>; Zapotec<sup>21, 23</sup>; Nahuatl<sup>26</sup>

Used for (44#): Digestive<sup>01, 02, 07, 20, 21</sup>; Cardiovascular<sup>02</sup>; Musculoskeletal<sup>01, 02, 03, 12, 13, 21</sup>; Neurological<sup>01, 02, 07, 12, 19</sup>;

Psychological<sup>01, 13</sup>; Respiratory<sup>01, 02, 03, 04, 12, 13, 19, 21</sup>; Skin<sup>01, 02, 03, 04, 13, 21</sup>; Pregnancy<sup>01, 21</sup>; Female genital<sup>02</sup>; General and Unspecified<sup>01, 07, 12, 13, 21, 23</sup>

Cognates: MZ: tzin; Zoq: tzin; CoreM: aj; Quich: chaj; WesM: taj;

Language contact:

## ***Piper* (Piperaceae)**

Spanish names: Acuyo; Acuyo cimarrón; Bella dona; Caite de Diablo; Cordoncillo; Cordoncillo de Montaña; Cordoncillo grande; Cordoncillo hembra; Cordoncillo macho, cabeza de guajilote; Cordoncillo oloroso; Cordoncillo verde; Cordonsillo; Hierba santa; Hierba santa/ (momo)/ hoja santa; Hierba santilla; Hoja de Jute; Hoja de Río; Hoja santa; Hoja/ yerba santa; Ixpiakok, Santa María ; Momo; Momo de chombo, momo de zopilote; Momo sylvestre/ haku simarron/ hoja santa simarrona; Obel; Omequelite; Omoquelite; Pata de vaca; Pie de pavito; Pimienta de castilla; Pimienta de castilla/pimienta chica; Pimienta negra; Planta Barón; San Diego; Tabaquillo; Tamagás; Tequelite; Velancitas

Indigenous names: Tunhkuy<sup>01</sup>; Jaku<sup>01</sup>; Pa' jaku/jiyen jaku/ jaku pa'an/ ji'ne haku<sup>01</sup>; Toso/tin ay<sup>02</sup>; Suj ay/syuj ay<sup>02</sup>; Suj<sup>02</sup>; Tooso<sup>03</sup>; Tsus tooso<sup>03</sup>; Aycuyo<sup>03</sup>; Aycuyo cimarrón<sup>03</sup>; Yuk yo'on<sup>04</sup>; Woo<sup>04</sup>; Yo'on<sup>04</sup>; Yuk woo<sup>04</sup>; Jinan<sup>05</sup>; Jina<sup>06</sup>; Sok'ot, xalacuahuit<sup>06</sup>; Paktha' yexal<sup>07</sup>; Tiiya', oh ts'ohool<sup>07</sup>; Bakaanil a iits', bok'ool uxkwe', pamta' an koy, bakanil an miimlaab, pakalaah, tiiya<sup>07</sup>; Thak kw'alal its'aamal<sup>07</sup>; Kw'alal its'aamal, yaxal, kw'alal an kwathab, kw'alal i puthuch, yaxal<sup>07</sup>; Tdak kw'alal ist'amal<sup>08</sup>; Xpeheche<sup>09</sup>; Ruchek k'uch<sup>12</sup>; R'u xac y'a<sup>12</sup>; Seq' Ruk'amal Aq'om Itzel Yabil<sup>12</sup>; Aq'om Q'aynaq' Cha'klaj<sup>12</sup>; Q'ampom, Re Tzuul<sup>14</sup>; Yut'it<sup>14</sup>; Q'eq'i Puchuch<sup>14</sup>; Kuxtin Q'ehen<sup>14</sup>; Lima Q'ehen, Telom Q'ehen, Saq'i Puchuch<sup>14</sup>; Xkub' sa' Qana', Hobel<sup>14</sup>; Tiq'ual Q'ehen<sup>14</sup>; Puchuch Q'ehen, Kuw Sawi'i, Kux Q'ehen<sup>14</sup>; Tzuul, Puchuch Q'ehen<sup>14</sup>; Puchuch<sup>14</sup>; Yut'it' puchuch<sup>14</sup>; Tz'y' Q'ehen<sup>14</sup>; Ob'el<sup>15</sup>; Puchuq<sup>15</sup>; Ampom<sup>15</sup>; Nin qui ru chaq' q'een<sup>15</sup>; Kan pom, pu'chuch<sup>16</sup>; U'bel<sup>16</sup>; Cux sawi<sup>16</sup>; Pu'chuch<sup>16</sup>; Kan pom<sup>16</sup>; Mai pim<sup>16</sup>; Tzirito' k'ejen<sup>17</sup>; K'an pom che<sup>17</sup>; Tyut it pim<sup>17</sup>; Cux sawi k'ejen<sup>17</sup>; Tzulub pim<sup>17</sup>; Momo<sup>18</sup>; Momo ajma<sup>18</sup>; Xuxpat ic<sup>18</sup>; Ok aj ts'o<sup>18</sup>; Ich pimyénta<sup>19</sup>; Guiadajna'a<sup>21</sup>; Hua'a<sup>21</sup>; Gui'iquimberu'u<sup>21</sup>; Guiadajna'a rooj<sup>21</sup>; Bala šoh<sup>22</sup>; Blàg-guiùu<sup>23</sup>; Acoyo<sup>24</sup>; Tequelite<sup>25</sup>; Tlanepaqueelite<sup>26</sup>; Acuyo xuitl<sup>28</sup>

Used by (27\*): Zoque<sup>01, 02, 03</sup>; Mixe<sup>04</sup>; Totonac<sup>05, 06</sup>; Huastec<sup>07</sup>; Yucatecan Maya<sup>09, 10, 11</sup>; Quichean Maya<sup>12, 14, 15, 16, 17</sup>; Western Maya<sup>18, 19, 20</sup>; Zapotec<sup>21, 22, 23</sup>; Nahuatl<sup>24, 25, 26, 27, 28</sup>

Used for (254#): Blood<sup>05, 12, 14, 15, 18</sup>; Digestive<sup>01, 02, 03, 05, 07, 08, 10, 11, 12, 14, 18, 19, 20, 21, 23, 25, 26, 28</sup>; Cardiovascular<sup>02, 12, 21</sup>;

Musculoskeletal<sup>01, 02, 03, 07, 11, 14, 15, 18, 21, 22, 26</sup>; Neurological<sup>02, 03, 07, 10, 11, 14, 16, 22, 28</sup>; Psychological<sup>02, 03, 14, 15, 16</sup>; Respiratory<sup>01, 02, 03, 07, 12, 14, 18, 21, 26, 28</sup>; Skin<sup>01, 02, 03, 04, 05, 07, 08, 09, 10, 11, 12, 14, 18, 21, 22, 23, 25, 26</sup>; Endocrine<sup>02</sup>; Urological<sup>01, 02, 14, 18</sup>; Pregnancy<sup>01, 02, 03, 05, 06, 07, 14, 15, 19, 22, 24, 27</sup>; Female genital<sup>02, 03, 12, 14, 15, 18, 19, 21</sup>; Male genital<sup>21</sup>; Social problems<sup>14</sup>; General and Unspecified<sup>01, 02, 03, 04, 05, 06, 07, 08, 11, 12, 14, 15, 16, 21, 22, 26</sup>; nd<sup>17</sup>

Cognates: Zoq: tVn, tooso, aku; Tot: jina; Maya: puCuch; Hua: tiiya, yaxal, tak kw'alal its'aamal; Quich: obel, q'ehen, puchuch, ampom, yut'it, kux; Nah: acoyo;

Language contact: Nah > Zoq; Zoq <> Tot & Hua

### ***Piptocarpha* (Asteraceae)**

Spanish names:

Indigenous names: Chunahak k'ejen<sup>17</sup>

Used by (1\*): Quichean Maya<sup>17</sup>

Used for (1#): nd<sup>17</sup>

Cognates:

Language contact:

### ***Piqueria* (Asteraceae)**

Spanish names:

Indigenous names: Guìzh-làs<sup>23</sup>; Bæǽl-dòo, guìzh-běǽl-dòo, bæǽl-dǒ, guìzh-běǽl-dǒ<sup>23</sup>

Used by (1\*): Zapotec<sup>23</sup>

Used for (6#): Musculoskeletal<sup>23</sup>; Psychological<sup>23</sup>; Skin<sup>23</sup>; Endocrine<sup>23</sup>; General and Unspecified<sup>23</sup>

Cognates:

Language contact:

### ***Piscidia* (Fabaceae)**

Spanish names:

Indigenous names: Ts'ihol, k'anaw te', chiihol<sup>07</sup>; Ha'abin<sup>09</sup>

Used by (2\*): Huastec<sup>07</sup>; Yucatecan Maya<sup>09</sup>

Used for (7#): Blood<sup>07</sup>; Digestive<sup>07, 09</sup>; Neurological<sup>07</sup>; Respiratory<sup>09</sup>; Skin<sup>07</sup>; General and Unspecified<sup>07</sup>

Cognates:

Language contact:

### ***Pisonia* (Nyctaginaceae)**

Spanish names: Uña de gato

Indigenous names: Loh, itsik mitsu<sup>07</sup>; Beeb<sup>09</sup>

Used by (2\*): Huastec<sup>07</sup>; Yucatecan Maya<sup>09</sup>

Used for (3#): Skin<sup>07</sup>; Pregnancy<sup>09</sup>; General and Unspecified<sup>07</sup>

Cognates:

Language contact:

### ***Pitcairnia* (Bromeliaceae)**

Spanish names: Cebolla de Monte

Indigenous names: Ceboll pim, Seb'oyil pim, Cewoyil pim<sup>14</sup>

Used by (1\*): Quichean Maya<sup>14</sup>

Used for (1#): Respiratory<sup>14</sup>

Cognates:

Language contact:

### ***Pithecellobium* (Fabaceae)**

Spanish names: Guamuchi; Guamúchil; Huamuchil; Palo de pinolio; Tucuy

Indigenous names: Poposyutil<sup>01</sup>; Umuw, umu<sup>07</sup>; Jumo<sup>08</sup>; So'sol (Xkenq)<sup>14</sup>; Te'aj tuk'uy<sup>18</sup>; Coamochitl<sup>28</sup>

Used by (8\*): Zoque<sup>01, 02</sup>; Huastec<sup>07, 08</sup>; Quichean Maya<sup>14</sup>; Western Maya<sup>18</sup>; Zapotec<sup>21</sup>; Nahua<sup>28</sup>

Used for (24#): Digestive<sup>01, 02, 07, 08, 14, 21, 28</sup>; Cardiovascular<sup>02</sup>; Musculoskeletal<sup>08</sup>; Neurological<sup>01, 07, 08</sup>; Respiratory<sup>08</sup>; Skin<sup>02, 18, 28</sup>; Pregnancy<sup>02</sup>; Female genital<sup>02</sup>; Male genital<sup>02</sup>; General and Unspecified<sup>07, 08, 14</sup>

Cognates: Hua: umo/umu;

Language contact: Hua <> Nah

### ***Pityopsis* (Asteraceae)**

Spanish names:

Indigenous names: Poja muk<sup>03</sup>

Used by (1\*): Zoque<sup>03</sup>

Used for (1#): Skin<sup>03</sup>

Cognates:

Language contact:

### ***Pityrogramma* (Pteridaceae)**

Spanish names: Helecho calado

Indigenous names: Jab kingin<sup>01</sup>; Poja chimal<sup>03</sup>; Jam ujts<sup>04</sup>; Roq chit cuan<sup>16</sup>

Used by (4\*): Zoque<sup>01, 03</sup>; Mixe<sup>04</sup>; Quichean Maya<sup>16</sup>

Used for (8#): Digestive<sup>01</sup>; Neurological<sup>16</sup>; Respiratory<sup>03</sup>; Skin<sup>03</sup>; Urological<sup>01</sup>; Female genital<sup>04</sup>; Male genital<sup>01</sup>; General and Unspecified<sup>16</sup>

Cognates: MZ: jaC; Zoq: ja;

Language contact:

### ***Plantago* (Plantaginaceae)**

Spanish names: lanté; Lengua de perro/ lengua de vaca; Llanté; Llanté/lantera/lanter/lengua de vaca/ lengua de perro; Llantén; Llantena, santena

Indigenous names: Tu' isy tojtz/ tuwi isy totz/ tu' totz<sup>01</sup>; Tu' totz<sup>01</sup>; Lentej ay<sup>03</sup>; Uxkin imul, jal q'ayes<sup>13</sup>; Ojalante<sup>18</sup>; Blàg-llàntèn, blàg-sàntèn, guizh-gòdz, xín-guizh-dòoz<sup>23</sup>

Used by (12\*): Zoque<sup>01, 03</sup>; Totonac<sup>06</sup>; Quichean Maya<sup>12, 13, 14</sup>; Western Maya<sup>18</sup>; Zapotec<sup>21, 22, 23</sup>; Nahua<sup>25, 26</sup>

Used for (40#): Blood<sup>12</sup>; Digestive<sup>01, 03, 12, 13, 14, 18, 22, 23, 25</sup>; Eye<sup>01, 13, 21</sup>; Cardiovascular<sup>12</sup>; Musculoskeletal<sup>01, 12, 13</sup>; Psychological<sup>12</sup>; Respiratory<sup>01, 18</sup>; Skin<sup>01, 12, 13, 26</sup>; Endocrine<sup>12</sup>; Urological<sup>01, 12, 26</sup>; Female genital<sup>01, 12, 18, 26</sup>; Male genital<sup>01</sup>; General and Unspecified<sup>06, 12</sup>

Cognates: Zoq: tu'(wi) totz;

Language contact: Zoq <> Zap

### ***Platanus* (Platanaceae)**

Spanish names: Chote; Palo blanco

Indigenous names: Taktak<sup>01</sup>

Used by (2\*): Zoque<sup>01</sup>; Nahua<sup>25</sup>

Used for (5#): Ear<sup>25</sup>; Musculoskeletal<sup>01</sup>; Endocrine<sup>25</sup>; Urological<sup>25</sup>; General and Unspecified<sup>01</sup>

Cognates:

Language contact:

### ***Platyclusus* (Cupressaceae)**

Spanish names: Ciprés

Indigenous names:

Used by (1\*): Yucatecan Maya<sup>11</sup>

Used for (1#): Respiratory<sup>11</sup>

Cognates:

Language contact:

### ***Plectranthus* (Lamiaceae)**

Spanish names: Copa de rey; Flor de mantu; Mantu morado/ manto morado; Oregano; Oregano castillo, oregano chino; Oregano orejón; Oregano

Indigenous names: Ts'kaw'e<sup>18</sup>

Used by (6\*): Zoque<sup>01, 02, 03</sup>; Yucatecan Maya<sup>09</sup>; Western Maya<sup>18</sup>; Nahua<sup>25</sup>

Used for (24#): Digestive<sup>01, 02, 03, 25</sup>; Eye<sup>03</sup>; Ear<sup>02, 03, 09, 18</sup>; Neurological<sup>01, 18</sup>; Respiratory<sup>01, 03, 18</sup>; Endocrine<sup>02</sup>; Urological<sup>02</sup>; Pregnancy<sup>03, 18</sup>; Female genital<sup>01</sup>; General and Unspecified<sup>01, 02</sup>

Cognates:

Language contact:

### ***Pleopeltis* (Polypodiaceae)**

Spanish names: Hierba de Palo con Mano, Calahuala

Indigenous names: K'amal Aqom Che' Qa'aj<sup>12</sup>

Used by (1\*): Quichean Maya<sup>12</sup>

Used for (7#): Blood<sup>12</sup>; Cardiovascular<sup>12</sup>; Musculoskeletal<sup>12</sup>; Psychological<sup>12</sup>; Urological<sup>12</sup>; Male genital<sup>12</sup>; General and Unspecified<sup>12</sup>

Cognates:

Language contact:

### ***Pluchea* (Asteraceae)**

Spanish names: Canela del rio; Ciguapate; Flor de Santa Maria, canela del rio, hoja de canela, ; Hierba de canela; Hierba de venado/ ojo de venado/ sivipake/ hierba la playa; Hoja de aire; Hoja de cancer; Salvia; Santa Maria; Siguapate; Yerba de canela

Indigenous names: Mä'a ome/ mä'a wa'a<sup>01</sup>; Syaw'ay<sup>02</sup>; Salve ay<sup>03</sup>; Santa Maria aay<sup>04</sup>; K'aninmiin ts'ohool, hom ts'ohool,<sup>07</sup>; Chalche<sup>09</sup>; Caal Ce<sup>10</sup>; Chalache<sup>11</sup>; Kewuhj<sup>12</sup>; Siguapate<sup>13</sup>; Mai pim<sup>16</sup>; Musik witzir<sup>19</sup>; Balagasana, gui'xaan<sup>21</sup>; Kwan zahn, kwan gusahn<sup>22</sup>; Guizh-cànêl<sup>23</sup>; Chiquite<sup>26</sup>

Used by (17\*): Zoque<sup>01, 02, 03</sup>; Mixe<sup>04</sup>; Huastec<sup>07</sup>; Yucatecan Maya<sup>09, 10, 11</sup>; Quichean Maya<sup>12, 13, 16, 17</sup>; Western Maya<sup>19</sup>; Zapotec<sup>21, 22, 23</sup>; Nahuatl<sup>26</sup>

Used for (65#): Digestive<sup>01, 02, 03, 04, 07, 11, 21, 22</sup>; Ear<sup>04</sup>; Cardiovascular<sup>03</sup>; Musculoskeletal<sup>01, 02, 03, 07, 11, 12, 13, 19, 21</sup>; Neurological<sup>01, 07, 11, 12, 13, 16, 19</sup>; Respiratory<sup>03, 07</sup>; Skin<sup>02, 03, 11</sup>; Urological<sup>01, 03, 12</sup>; Pregnancy<sup>01, 02, 03, 07, 09, 10, 12, 19, 21, 22, 23</sup>; Female genital<sup>02, 03, 04, 19</sup>;

Male genital<sup>01</sup>; General and Unspecified<sup>01, 02, 03, 07, 10, 11, 12, 19, 26</sup>; nd<sup>17</sup>

Cognates: Yuc: chaalche; Zap: san;

Language contact:

### ***Plumbago* (Plumbaginaceae)**

Spanish names: Hierba del pez; Hoja de chivato

Indigenous names: Hurika<sup>07</sup>; Hurika<sup>08</sup>; Guish chivat<sup>21</sup>; Guizh-nàad, guizh-mòràdítò<sup>23</sup>

Used by (4\*): Huastec<sup>07, 08</sup>; Zapotec<sup>21, 23</sup>

Used for (7#): Digestive<sup>23</sup>; Musculoskeletal<sup>07</sup>; Skin<sup>07, 08, 21</sup>; General and Unspecified<sup>07, 08</sup>

Cognates: Hua: hurik;

Language contact:

### ***Plumeria* (Apocynaceae)**

Spanish names: Cacalosúchitl, flor de mayo; Flor de cal; Flor de mayo; Flor de mayo simarron; Palo loco

Indigenous names: (Tzama) popo jäyá<sup>01</sup>; Puutx mooya<sup>03</sup>; San Juan pøh<sup>04</sup>; Caxta xanat<sup>06</sup>; Ukul wits<sup>07</sup>; Nikte'ch'om<sup>09</sup>; Guiatzatzii quitii<sup>21</sup>; Yàg-guìèè-yäl<sup>23</sup>; Cacaloxochitl<sup>24</sup>; Cacahuaxóchitl<sup>25</sup>

Used by (10\*): Zoque<sup>01, 03</sup>; Mixe<sup>04</sup>; Totonac<sup>06</sup>; Huastec<sup>07</sup>; Yucatecan Maya<sup>09</sup>; Zapotec<sup>21, 23</sup>; Nahuatl<sup>24, 25</sup>

Used for (23#): Digestive<sup>03, 04, 06, 23, 25</sup>; Eye<sup>23</sup>; Musculoskeletal<sup>01, 04, 21</sup>; Neurological<sup>03</sup>; Respiratory<sup>21</sup>; Skin<sup>01, 07, 09, 21, 24</sup>; Urological<sup>01</sup>; Female genital<sup>01, 06, 21</sup>; General and Unspecified<sup>03, 04, 21</sup>

Cognates: Nah: cacahuaxochitl;

Language contact:

### ***Pogostemon* (Lamiaceae)**

Spanish names: Oregano grande; Patchuli

Indigenous names: Perfumen ujts<sup>04</sup>; Yop'aj pachulin<sup>18</sup>

Used by (3\*): Mixe<sup>04</sup>; Western Maya<sup>18</sup>; Zapotec<sup>21</sup>

Used for (8#): Digestive<sup>18, 21</sup>; Respiratory<sup>21</sup>; Pregnancy<sup>21</sup>; Female genital<sup>21</sup>; General and Unspecified<sup>04, 18, 21</sup>

Cognates:

Language contact:

### ***Poiretia* (Fabaceae)**

Spanish names: Hierba malina; Hoja malina

Indigenous names: Poj jäjä<sup>02</sup>; Malin ujts<sup>04</sup>; Guixa'a<sup>21</sup>

Used by (3\*): Zoque<sup>02</sup>; Mixe<sup>04</sup>; Zapotec<sup>21</sup>

Used for (7#): Digestive<sup>21</sup>; Musculoskeletal<sup>02, 04, 21</sup>; Skin<sup>21</sup>; General and Unspecified<sup>04, 21</sup>

Cognates:

Language contact:

### ***Polianthes* (Asparagaceae)**

Spanish names: Azuzena

Indigenous names:

Used by (1\*): Zoque<sup>02</sup>

Used for (2#): Respiratory<sup>02</sup>; Pregnancy<sup>02</sup>

Cognates:

Language contact:

### ***Polygala* (Polygalaceae)**

Spanish names: Anis, reumatuluc; Lavapie/flor de esquipulas/ hierba de seiscientos

Indigenous names: Kä tzanhga / kä tzanhgä<sup>01</sup>; Ueji ay<sup>03</sup>; Møøy ics<sup>04</sup>; Tsakam tsak mokok, ith ts'ohool<sup>07</sup>

Used by (5\*): Zoque<sup>01, 03</sup>; Mixe<sup>04</sup>; Huastec<sup>07</sup>; Nahua<sup>26</sup>

Used for (9#): Digestive<sup>03, 04</sup>; Musculoskeletal<sup>26</sup>; Psychological<sup>03</sup>; Skin<sup>01, 03, 07</sup>; Pregnancy<sup>07</sup>; General and Unspecified<sup>03</sup>

Cognates:

Language contact:

### ***Polygonum* (Polygonaceae)**

Spanish names: Lirio de Agua

Indigenous names: Ehtiiil tok'oy<sup>07</sup>; Aq'om Q'os ya' / Nuwulaj Abäj<sup>12</sup>

Used by (2\*): Huastec<sup>07</sup>; Quichean Maya<sup>12</sup>

Used for (3#): Digestive<sup>12</sup>; Urological<sup>12</sup>; General and Unspecified<sup>07</sup>

Cognates:

Language contact:

### ***Polypodium* (Polypodiaceae)**

Spanish names: Calagual, canaguala; Calahuala; Helecho menor

Indigenous names: Tsa chimal<sup>03</sup>; Canagual<sup>03</sup>; Koo'te', tsooy ahaatik, kutsiil boo'waat, chuchim ts'ohool<sup>07</sup>; K'umatz Ruxe' lbo'ch<sup>12</sup>; Báz, guìzh-bàz<sup>23</sup>

Used by (5\*): Zoque<sup>03</sup>; Huastec<sup>07</sup>; Quichean Maya<sup>12, 13</sup>; Zapotec<sup>23</sup>

Used for (30#): Digestive<sup>03, 12, 13, 23</sup>; Cardiovascular<sup>03, 12</sup>; Musculoskeletal<sup>03, 12, 13</sup>; Neurological<sup>07, 12</sup>; Psychological<sup>12</sup>; Respiratory<sup>03, 23</sup>; Skin<sup>03, 12</sup>; Endocrine<sup>03, 12, 13</sup>; Urological<sup>03, 12</sup>; Female genital<sup>12</sup>; General and Unspecified<sup>07, 12, 13, 23</sup>

Cognates:

Language contact:

### ***Polypremum* (Tetrachondraceae)**

Spanish names:

Indigenous names: Billushit<sup>22</sup>

Used by (1\*): Zapotec<sup>22</sup>

Used for (1#): Digestive<sup>22</sup>

Cognates:

Language contact:



### ***Pontederia* . (Pontederiaceae)**

Spanish names:

Indigenous names: Xjolom Wakax<sup>14</sup>

Used by (1\*): Quichean Maya<sup>14</sup>

Used for (4#): Digestive<sup>14</sup>; Urological<sup>14</sup>; Female genital<sup>14</sup>; General and Unspecified<sup>14</sup>

Cognates:

Language contact:

### ***Populus* (Salicaceae)**

Spanish names:

Indigenous names: Itsow<sup>07</sup>

Used by (1\*): Huastec<sup>07</sup>

Used for (1#): Psychological<sup>07</sup>

Cognates:

Language contact:

### ***Porophyllum* (Asteraceae)**

Spanish names: Guapillo; Hoja de bruja/ de piojo; Hoja de orín; Papaloquelite; Papaloquelite, hoja quelite

Indigenous names: Comunkꞑ tsꞑpꞑ<sup>03</sup>; Tapahuelo<sup>04</sup>; Pucsnanca'a<sup>06</sup>; Mithith<sup>07</sup>; Xuk'ii<sup>09</sup>; So'sol Q'ehen (Macho)<sup>14</sup>; Sosol pim<sup>16</sup>; Gixa'a mbeetzii<sup>21</sup>

Used by (11\*): Zoque<sup>01, 03</sup>; Mixe<sup>04</sup>; Totonac<sup>06</sup>; Huastec<sup>07</sup>; Yucatecan Maya<sup>09</sup>; Quichean Maya<sup>14, 16</sup>; Western Maya<sup>18, 19</sup>; Zapotec<sup>21</sup>

Used for (22#): Blood<sup>03</sup>; Digestive<sup>03, 06, 07, 18, 21</sup>; Cardiovascular<sup>07</sup>; Musculoskeletal<sup>18, 21</sup>; Neurological<sup>04, 16</sup>; Psychological<sup>14, 16</sup>; Skin<sup>03, 18</sup>; Urological<sup>01</sup>; Pregnancy<sup>19</sup>; General and Unspecified<sup>03, 06, 09, 18, 21</sup>

Cognates: Quich: sosol;

Language contact:

### ***Portulaca* (Portulacaceae)**

Spanish names: Verdolaga

Indigenous names: X'puhl cac'a<sup>06</sup>; Pitsits wal, he'pan paktha', tsakam ix thuyum<sup>07</sup>; Tsakam tsatsa, chak wits<sup>07</sup>; Pixla<sup>12</sup>; Paxlac<sup>13</sup>; Mixquilit<sup>28</sup>

Used by (7\*): Totonac<sup>06</sup>; Huastec<sup>07</sup>; Quichean Maya<sup>12, 13</sup>; Zapotec<sup>21</sup>; Nahua<sup>26, 28</sup>

Used for (18#): Blood<sup>06, 13</sup>; Digestive<sup>07, 12, 13, 28</sup>; Respiratory<sup>07</sup>; Skin<sup>07, 12</sup>; Urological<sup>12, 26</sup>; Male genital<sup>12</sup>; General and Unspecified<sup>06, 07, 12, 21, 28</sup>

Cognates: Maya: pits/pix/pax; Quich: pix/pax;

Language contact:

### ***Pouteria* (Sapotaceae)**

Spanish names: Mamey; Mamey/zapote; Mamey/zapote (colorado); Zapote blanco; Zapote mamey

Indigenous names: Taki syapane/tzapas tzapane<sup>01</sup>; Tzapane/nui nãjä/kawak<sup>02</sup>; Chu kuxamñi<sup>03</sup>; Kuxamñi<sup>03</sup>; Tsatsootso<sup>03</sup>; Jaka<sup>05</sup>; Jaaca<sup>06</sup>; Thokob<sup>07</sup>; Bolom it'ath<sup>07</sup>; Sakya<sup>09</sup>; La'adxiguellexuunu'uj<sup>21</sup>

Used by (9\*): Zoque<sup>01, 02, 03</sup>; Totonac<sup>05, 06</sup>; Huastec<sup>07</sup>; Yucatecan Maya<sup>09, 11</sup>; Zapotec<sup>21</sup>

Used for (27#): Digestive<sup>03, 06, 09</sup>; Cardiovascular<sup>07</sup>; Musculoskeletal<sup>03, 21</sup>; Psychological<sup>03, 05</sup>; Respiratory<sup>03, 07</sup>; Skin<sup>01, 02, 03, 06, 07, 11, 21</sup>; Pregnancy<sup>03</sup>; Female genital<sup>03</sup>; General and Unspecified<sup>06, 21</sup>

Cognates: Zoq: tsapane;

Language contact: Tot <> Yuc

### ***Pouzolzia* (Urticaceae)**

Spanish names:

Indigenous names: Uxum ilaal, tsakam baat<sup>07</sup>

Used by (1\*): Huastec<sup>07</sup>

Used for (5#): Digestive<sup>07</sup>; Musculoskeletal<sup>07</sup>; Respiratory<sup>07</sup>; Pregnancy<sup>07</sup>; Female genital<sup>07</sup>

Cognates:

Language contact:

### ***Prestonia* (Apocynaceae)**

Spanish names: Bejuco de jiote

Indigenous names: Kutsʷk<sup>03</sup>

Used by (1\*): Zoque<sup>03</sup>

Used for (1#): Skin<sup>03</sup>

Cognates:

Language contact:

### ***Prionosciadium* (Apiaceae)**

Spanish names: Eneldo, chilibia; Eneldón

Indigenous names: Tzi, tunai, buxnay<sup>13</sup>

Used by (2\*): Zoque<sup>01</sup>; Quichean Maya<sup>13</sup>

Used for (3#): Digestive<sup>13</sup>; Pregnancy<sup>01</sup>; General and Unspecified<sup>13</sup>

Cognates:

Language contact:

### ***Priva* (Verbenaceae)**

Spanish names: Cadillo de bolsa; Hoja de azar; Jehuite chicloso; Sogia de tusa

Indigenous names: Tza'a tzoj<sup>01</sup>; Tʷpich nang tsang<sup>03</sup>; T'apay ts'ohool<sup>07</sup>; Tapay ts'ohool<sup>08</sup>; Xpak'umpak<sup>09</sup>; Pax Pa'am<sup>14</sup>

Used by (8\*): Zoque<sup>01, 03</sup>; Huastec<sup>07, 08</sup>; Yucatecan Maya<sup>09</sup>; Quichean Maya<sup>14</sup>; Western Maya<sup>18</sup>; Nahua<sup>24</sup>

Used for (11#): Digestive<sup>03, 07, 09</sup>; Musculoskeletal<sup>08</sup>; Neurological<sup>08</sup>; Skin<sup>09, 18</sup>; Pregnancy<sup>24</sup>; Female genital<sup>03, 14</sup>; General and Unspecified<sup>01</sup>

Cognates: Zoq: tsa; Maya: paC; Hua: tapay ts'ohool;

Language contact: Hua > Highland Popoluca

### ***Prosopis* (Fabaceae)**

Spanish names: Mesquite; Mezquite

Indigenous names: Ut'u<sup>07</sup>; Geč beh<sup>22</sup>; Mizquiti<sup>28</sup>

Used by (5\*): Huastec<sup>07</sup>; Zapotec<sup>21, 22</sup>; Nahua<sup>27, 28</sup>

Used for (12#): Digestive<sup>21, 22, 27, 28</sup>; Eye<sup>07, 21, 22, 27, 28</sup>; Skin<sup>21</sup>; Pregnancy<sup>27</sup>; General and Unspecified<sup>21</sup>

Cognates:

Language contact:

### ***Prosthechea* (Orchidaceae)**

Spanish names:

Indigenous names: Ts'aak<sup>07</sup>

Used by (1\*): Huastec<sup>07</sup>

Used for (1#): Endocrine<sup>07</sup>

Cognates:

Language contact:

### ***Protium* (Burseraceae)**

Spanish names: Copal; Copal de chichi; Copalillo

Indigenous names: Tzyutyzyin bono/kutyzyin bono/cochinbomo/Tzyityzyin bomo<sup>01</sup>; Puam, pum<sup>05</sup>; Homte', hom, ikob te<sup>07</sup>;

Pom<sup>10</sup>; Pom<sup>11</sup>

Used by (5\*): Zoque<sup>01</sup>; Totonac<sup>05</sup>; Huastec<sup>07</sup>; Yucatecan Maya<sup>10, 11</sup>

Used for (14#): Digestive<sup>01, 07</sup>; Ear<sup>07</sup>; Musculoskeletal<sup>01, 11</sup>; Neurological<sup>07, 10, 11</sup>; Respiratory<sup>01</sup>; Skin<sup>05</sup>; General and Unspecified<sup>05, 07, 10, 11</sup>

Cognates: Maya: om; Yuc: pom;

Language contact: MZ > Tot & Maya

### ***Prunella* (Lamiaceae)**

Spanish names:

Indigenous names: Xinahuatē<sup>26</sup>

Used by (2\*): Quichean Maya<sup>13</sup>; Nahua<sup>26</sup>

Used for (2#): Skin<sup>13, 26</sup>

Cognates:

Language contact:

### ***Prunus* (Rosaceae)**

Spanish names: Cerezo; Chabacano; Ciruela; Durazno

Indigenous names: Tunas<sup>01</sup>; Tras<sup>13</sup>; K'ask'el<sup>13</sup>; Turesna<sup>20</sup>; Yàg-dràz<sup>23</sup>; Yàg-bziä<sup>23</sup>

Used by (8\*): Zoque<sup>01</sup>; Totonac<sup>06</sup>; Quichean Maya<sup>12, 13</sup>; Western Maya<sup>20</sup>; Zapotec<sup>23</sup>; Nahua<sup>25, 26</sup>

Used for (28#): Digestive<sup>01, 12, 13, 20, 23, 25, 26</sup>; Cardiovascular<sup>01</sup>; Musculoskeletal<sup>13</sup>; Neurological<sup>01, 12, 26</sup>; Respiratory<sup>01, 12, 13</sup>; Skin<sup>06, 12, 13, 25</sup>; Pregnancy<sup>06</sup>; Female genital<sup>01</sup>; General and Unspecified<sup>01, 12, 13</sup>

Cognates:

Language contact:

### ***Pseudelephantopus* (Asteraceae)**

Spanish names: Lengua de vaca

Indigenous names: Lek'ab paakax<sup>07</sup>

Used by (2\*): Zoque<sup>03</sup>; Huastec<sup>07</sup>

Used for (5#): Digestive<sup>03</sup>; Neurological<sup>07</sup>; Respiratory<sup>03</sup>; Skin<sup>03</sup>; Urological<sup>03</sup>

Cognates:

Language contact:

### ***Pseudobombax* (Malvaceae)**

Spanish names: Amabola blanco; Clavillina; Solosoche

Indigenous names: Tzospo/ a'pompo<sup>02</sup>; Pop uakta<sup>03</sup>; Mokok<sup>07</sup>; Siklite, Xk'uxche<sup>09</sup>; Xiloxoochitl<sup>24</sup>

Used by (5\*): Zoque<sup>02, 03</sup>; Huastec<sup>07</sup>; Yucatecan Maya<sup>09</sup>; Nahua<sup>24</sup>

Used for (12#): Digestive<sup>07</sup>; Psychological<sup>07</sup>; Respiratory<sup>09</sup>; Endocrine<sup>02</sup>; Urological<sup>02, 03</sup>; Pregnancy<sup>03, 07, 24</sup>; Female genital<sup>03</sup>; General and Unspecified<sup>03, 07</sup>

Cognates: Zoq: po(m)p;

Language contact:

### ***Pseudognaphalium* (Asteraceae)**

Spanish names: Gordolobo; Simonilla

Indigenous names: Popo 'uka tane/popo jâyä/pop tane/ akstäk tane<sup>01</sup>; Sìmònì<sup>23</sup>; Gòrdòlòb<sup>23</sup>

Used by (6\*): Zoque<sup>01, 02</sup>; Zapotec<sup>23</sup>; Nahua<sup>25, 26, 28</sup>

Used for (17#): Blood<sup>23</sup>; Digestive<sup>01, 23</sup>; Cardiovascular<sup>28</sup>; Neurological<sup>25</sup>; Respiratory<sup>01, 02, 23, 25, 26, 28</sup>; Skin<sup>01, 23</sup>; Urological<sup>28</sup>; Pregnancy<sup>23</sup>; General and Unspecified<sup>23, 28</sup>

Cognates:

Language contact:

### ***Pseudogynoxys* (Asteraceae)**

Spanish names: Hierba de carga

Indigenous names: Tzämi tzoy<sup>01</sup>; Uentex ay<sup>03</sup>; Te'te' wits, chuklaab ts'ohool<sup>07</sup>; Kanal xijch<sup>20</sup>

Used by (4\*): Zoque<sup>01, 03</sup>; Huastec<sup>07</sup>; Western Maya<sup>20</sup>

Used for (4#): Digestive<sup>20</sup>; Skin<sup>03</sup>; General and Unspecified<sup>01, 07</sup>

Cognates:

Language contact:

### ***Psidium* (Myrtaceae)**

Spanish names: Guabillo; Guajaba sabanera; Guajava agria; Guayaba; Guayaba (dulce/agría); Guayaba agria; Guayaba cimmaron; Guayaba dulce; Guayabita/guayaba agria; Guayabo; Guayabo moreno; Guayava; Itamo real; Raiana; Rayana, guayaba arrayán; Rayanita, Rayana, Capulín de tierra

Indigenous names: Po'os/padan/paran/pataya<sup>01</sup>; Katsu patan/katsu paran/ katsu 'ätz/ katzsy patan/ katsu wos<sup>01</sup>; Poks/po's/pataya<sup>02</sup>; Poks pataja/ katsu pataja/ toks pataja<sup>02</sup>; Nas mupe<sup>02</sup>; Katsu patan<sup>03</sup>; Patan<sup>03</sup>; Copa patan<sup>03</sup>; Pox<sup>04</sup>; Jokønyapox tikts<sup>04</sup>; Asihuit, aci'huit, llasibit<sup>05</sup>; Aa'si'huiit<sup>06</sup>; Bek<sup>07</sup>; Bekil tooro, beekil an buuru<sup>07</sup>; Bek<sup>08</sup>; Pichi<sup>09</sup>; Pichiche<sup>09</sup>; PiČi<sup>10</sup>; Keq<sup>12</sup>; (Kia/Chom) Kiej/keq<sup>13</sup>; Pata'a<sup>14</sup>; Pata<sup>18</sup>; Pataj<sup>19</sup>; Ixim pataj<sup>19</sup>; Pata, potov, potoj, poto<sup>20</sup>; Paxchak', pajal pata/potoj, potov, poto<sup>20</sup>; Guisha nguetuj<sup>21</sup>; Behuishxuba'a<sup>21</sup>; Bihuishuba'aj<sup>21</sup>; Băwi<sup>22</sup>; Xalxocotl<sup>24</sup>; Xalxocotl<sup>26</sup>; Xalxócotl<sup>28</sup>

Used by (24\*): Zoque<sup>01, 02, 03</sup>; Mixe<sup>04</sup>; Totonac<sup>05, 06</sup>; Huastec<sup>07, 08</sup>; Yucatecan Maya<sup>09, 10, 11</sup>; Quichean Maya<sup>12, 13, 14</sup>; Western Maya<sup>18, 19, 20</sup>; Zapotec<sup>21, 22</sup>; Nahua<sup>24, 25, 26, 27, 28</sup>

Used for (103#): Blood<sup>12</sup>; Digestive<sup>01, 02, 03, 04, 05, 06, 07, 08, 09, 10, 11, 12, 13, 14, 18, 19, 20, 21, 22, 24, 25, 26, 27, 28</sup>; Eye<sup>20</sup>; Ear<sup>01</sup>; Cardiovascular<sup>02, 12</sup>; Musculoskeletal<sup>01, 12</sup>; Neurological<sup>01, 02, 08, 20</sup>; Psychological<sup>01, 12</sup>; Respiratory<sup>01, 02, 03, 07, 19, 20, 28</sup>; Skin<sup>01, 02, 03, 05, 07, 08, 09, 10, 14, 18, 25, 26</sup>; Urological<sup>01, 02, 03, 07, 26</sup>; Pregnancy<sup>02, 05, 13, 19</sup>; Female genital<sup>01, 02, 03, 13, 19, 21</sup>; General and Unspecified<sup>01, 02, 05, 09, 12, 13, 21, 28</sup>

Cognates: MZ: pos / pox; Zoq: patan / pataja; Tot: asihuit; Maya: bek / keq; Hua: bek; Yuc: pichi; Quich: keq; WesM: pata; Zap: bewi; Nah: xalxocotl;

Language contact: Zoq > Kekchi & WesM

### ***Psiguria* (Cucurbitaceae)**

Spanish names:

Indigenous names:

Used by (1\*): Zoque<sup>03</sup>

Used for (1#): Skin<sup>03</sup>

Cognates:

Language contact:

### ***Psittacanthus* (Loranthaceae)**

Spanish names: Hoja de urraca, mata palo

Indigenous names: Ok'lom te' puulik<sup>07</sup>; Guixa'a shaguii<sup>21</sup>; Guièe-ló-yâg-guièts, guièe-ló-yâg-nlibâd-tsò<sup>23</sup>

Used by (3\*): Huastec<sup>07</sup>; Zapotec<sup>21, 23</sup>

Used for (7#): Digestive<sup>07</sup>; Neurological<sup>07, 23</sup>; Skin<sup>07, 21</sup>; General and Unspecified<sup>07, 21</sup>

Cognates:

Language contact:

### ***Psychotria* (Rubiaceae)**

Spanish names: Cafecillo; Curamal; Hierba de sabañon; Hoja morada; Segunda Lengua del Perro; Simonillo

Indigenous names: Masan ay<sup>03</sup>; Tsus pitx cuy<sup>03</sup>; Tam txitx¥k<sup>03</sup>; Masan ay, Monch¥v ay<sup>03</sup>; Baina ts'ohool, wiichab ts'ohool, bekil papaam, k'animiin wits, mapux ts'ohool, bathex, ook' tse'tsem, paktha' wach'uy ch'ohool<sup>07</sup>; Tse'tsem ts'ohool, kapee ts'ohool, tsakam ts'abat, t'othooybe ts'ohool, baina ts'ohool, itsal kw'a, wats'ul, thuyum olom<sup>07</sup>; Tschul-keeh<sup>09</sup>; Š Anal<sup>10</sup>; Chäk K'ānan<sup>11</sup>; Ix k'ā anal hembra<sup>11</sup>; Xkoti yuk<sup>14</sup>; Xkab' Rujiraq'i Tzi'i<sup>14</sup>; Tzuul Q'eheh re Ha<sup>14</sup>; Na' Ichaj<sup>14</sup>; Re Kanteel, Mai Tzuul<sup>14</sup>; Ak Pere Tzo', peren pim<sup>15</sup>; Saxjolom chilán<sup>16</sup>; Colaras<sup>16</sup>

Used by (10\*): Zoque<sup>03</sup>; Huastec<sup>07</sup>; Yucatecan Maya<sup>09, 10, 11</sup>; Quichean Maya<sup>14, 15, 16, 17</sup>; Nahua<sup>26</sup>

Used for (38#): Digestive<sup>03, 07, 11, 14</sup>; Musculoskeletal<sup>03, 14</sup>; Neurological<sup>09, 10, 14, 16</sup>; Respiratory<sup>14</sup>; Skin<sup>03, 07, 26</sup>; Pregnancy<sup>15</sup>; Female genital<sup>03, 14</sup>; General and Unspecified<sup>07, 09, 11, 14</sup>; nd<sup>17</sup>

Cognates: Yuc: anal;

Language contact:

### ***Pteridium* (Dennstaedtiaceae)**

Spanish names: Costilludo/ tapa carbon; Helecho chispa; Ocopeta; Pema

Indigenous names: Xip<sup>13</sup>

Used by (4\*): Zoque<sup>01, 03</sup>; Quichean Maya<sup>13</sup>; Nahua<sup>25</sup>

Used for (7#): Musculoskeletal<sup>13</sup>; Psychological<sup>03</sup>; Respiratory<sup>03, 25</sup>; Endocrine<sup>25</sup>; Pregnancy<sup>01</sup>; General and Unspecified<sup>13</sup>

Cognates:

Language contact:

### ***Pteris* (Pteridaceae)**

Spanish names: Helecho liso; Helecho macho

Indigenous names: Taksy kingin/ pu'kuy tuks<sup>01</sup>; Mä'a kingin<sup>01</sup>

Used by (2\*): Zoque<sup>01</sup>; Quichean Maya<sup>16</sup>

Used for (8#): Digestive<sup>01</sup>; Psychological<sup>16</sup>; Endocrine<sup>01</sup>; Urological<sup>01</sup>; Male genital<sup>01</sup>; General and Unspecified<sup>01, 16</sup>

Cognates:

Language contact:

### ***Pterocarpus* (Fabaceae)**

Spanish names:

Indigenous names: Akxcuy<sup>03</sup>

Used by (1\*): Zoque<sup>03</sup>

Used for (2#): Skin<sup>03</sup>; Female genital<sup>03</sup>

Cognates:

Language contact:

### ***Punica* (Lythraceae)**

Spanish names: Granada

Indigenous names:

Used by (1\*): Western Maya<sup>19</sup>

Used for (1#): Digestive<sup>19</sup>

Cognates:

Language contact:

### ***Punica* (Lythraceae)**

Spanish names: Granada; Granado; Grenadillo

Indigenous names: Laab bek<sup>07</sup>; Žob štil<sup>22</sup>; Yàg-ngùd-guièe-ziè, yàg-grànâd<sup>23</sup>

Used by (14\*): Zoque<sup>01, 02, 03</sup>; Mixe<sup>04</sup>; Huastec<sup>07</sup>; Yucatecan Maya<sup>09, 10</sup>; Quichean Maya<sup>12, 13</sup>; Western Maya<sup>18</sup>; Zapotec<sup>21, 22, 23</sup>; Nahua<sup>28</sup>

Used for (25#): Blood<sup>02</sup>; Digestive<sup>01, 02, 03, 04, 07, 09, 12, 18, 21, 22, 23, 28</sup>; Eye<sup>13</sup>; Musculoskeletal<sup>21</sup>; Neurological<sup>12, 28</sup>; Psychological<sup>12</sup>; Respiratory<sup>21</sup>; Skin<sup>02, 09, 21</sup>; Pregnancy<sup>10</sup>; Female genital<sup>21</sup>; General and Unspecified<sup>12</sup>

Cognates:

Language contact:

### ***Quassia* (Simaroubaceae)**

Spanish names: Cuassia

Indigenous names:

Used by (1\*): Zapotec<sup>21</sup>

Used for (1#): Digestive<sup>21</sup>

Cognates:

Language contact:

### ***Quercus* (Fagaceae)**

Spanish names: Encino; Encino amarillo; Encino blanco; Encino blanco/nanche; Encino nanche/encino rojo; Encino negro; Encino rojo; Encino, Roble; Roble; Roble blanco

Indigenous names: Popo kamay<sup>01</sup>; Pak soj/syoj<sup>02</sup>; Popo soj<sup>02</sup>; Cap soj / Tsabats soj<sup>03</sup>; Puutx soj<sup>03</sup>; Pop soj<sup>03</sup>; Yŋk soj<sup>03</sup>; Soj<sup>03</sup>; Ok soj<sup>03</sup>; Poop xoj<sup>04</sup>; Jiny xoj<sup>04</sup>; Tsapt xoj, poop xoj<sup>04</sup>; Patän, Raxche<sup>12</sup>; Pichik<sup>12</sup>; Patän che', Răx che'<sup>12</sup>; Sk'el, squ'el, tuluk, tux<sup>13</sup>; Ch'oror<sup>19</sup>; Sak yok jij te'<sup>20</sup>; K'an tulan<sup>20</sup>; Beshxii qutzii<sup>21</sup>; Beshxii nagatzii<sup>21</sup>

Used by (9\*): Zoque<sup>01, 02, 03</sup>; Mixe<sup>04</sup>; Quichean Maya<sup>12, 13</sup>; Western Maya<sup>19, 20</sup>; Zapotec<sup>21</sup>

Used for (53#): Blood<sup>03</sup>; Digestive<sup>01, 02, 03, 04, 12, 13, 19, 20, 21</sup>; Cardiovascular<sup>12</sup>; Musculoskeletal<sup>02, 12</sup>; Neurological<sup>01, 02, 03, 12, 13, 19</sup>; Respiratory<sup>02</sup>; Skin<sup>02, 03, 04, 12, 13</sup>; Endocrine<sup>01</sup>; Pregnancy<sup>03</sup>; Female genital<sup>02, 03, 04, 21</sup>; General and Unspecified<sup>12, 13, 21</sup>

Cognates: MZ: soj/xoj; CoreM: tulan/tuluk;

Language contact:

### ***Randia* (Rubiaceae)**

Spanish names: Morro

Indigenous names: Jeepe ay, Chuk wipak<sup>03</sup>; Tsootsoob olom, tsetsbaal i olom, kruus k'iith<sup>07</sup>; K'ax<sup>09</sup>

Used by (4\*): Zoque<sup>01, 03</sup>; Huastec<sup>07</sup>; Yucatecan Maya<sup>09</sup>

Used for (8#): Digestive<sup>01, 07</sup>; Neurological<sup>03</sup>; Psychological<sup>03</sup>; Skin<sup>03, 07</sup>; General and Unspecified<sup>03, 09</sup>

Cognates:

Language contact:

### ***Ranunculus* (Ranunculaceae)**

Spanish names: Pata de león, mano de león; Tijebete

Indigenous names: Xat uxaj<sup>13</sup>

Used by (2\*): Quichean Maya<sup>13</sup>; Nahua<sup>26</sup>

Used for (5#): Musculoskeletal<sup>26</sup>; Skin<sup>13, 26</sup>; Endocrine<sup>26</sup>; General and Unspecified<sup>13</sup>

Cognates:

Language contact:

### ***Raphanus* (Brassicaceae)**

Spanish names: Rabano

Indigenous names:

Used by (5\*): Zoque<sup>01</sup>; Yucatecan Maya<sup>09</sup>; Quichean Maya<sup>12, 13</sup>; Zapotec<sup>23</sup>

Used for (12#): Digestive<sup>12, 13</sup>; Cardiovascular<sup>12</sup>; Musculoskeletal<sup>12</sup>; Respiratory<sup>01, 09, 13</sup>; Skin<sup>13</sup>; Urological<sup>12</sup>; Male genital<sup>12</sup>; General and Unspecified<sup>12, 23</sup>

Cognates:

Language contact:

### ***Rauvolfia* (Apocynaceae)**

Spanish names: Chalchupa; Veneno de perro

Indigenous names: Itsaan an k'ak'al ilaal<sup>07</sup>; Kambamuk<sup>09</sup>; Sisar k'opot<sup>19</sup>; Guanabajcu<sup>21</sup>

Used by (5\*): Zoque<sup>03</sup>; Huastec<sup>07</sup>; Yucatecan Maya<sup>09</sup>; Western Maya<sup>19</sup>; Zapotec<sup>21</sup>

Used for (8#): Skin<sup>03, 09, 21</sup>; Pregnancy<sup>19</sup>; Female genital<sup>03, 19, 21</sup>; General and Unspecified<sup>07</sup>

Cognates:

Language contact:

### ***Renealmia* (Zingiberaceae)**

Spanish names:

Indigenous names: Jua<sup>01</sup>; Jua'/tzuku' waja<sup>02</sup>; Tz'i'<sup>14</sup>

Used by (3\*): Zoque<sup>01, 02</sup>; Quichean Maya<sup>14</sup>

Used for (4#): Musculoskeletal<sup>02, 14</sup>; Skin<sup>02</sup>; General and Unspecified<sup>01</sup>

Cognates: Zoq: jua;

Language contact:

### ***Rhamnus* (Rhamnaceae)**

Spanish names:

Indigenous names: Itsil, ichil<sup>07</sup>

Used by (1\*): Huastec<sup>07</sup>

Used for (1#): General and Unspecified<sup>07</sup>

Cognates:

Language contact:

### ***Rheum* (Polygonaceae)**

Spanish names: Ruibarbo

Indigenous names:

Used by (1\*): Quichean Maya<sup>12</sup>

Used for (3#): Blood<sup>12</sup>; Digestive<sup>12</sup>; Cardiovascular<sup>12</sup>

Cognates:

Language contact:

### ***Rhipidocladum* (Poaceae)**

Spanish names: Carrizo

Indigenous names: Aj Che K'etchelaj<sup>12</sup>

Used by (1\*): Quichean Maya<sup>12</sup>

Used for (2#): Musculoskeletal<sup>12</sup>; Urological<sup>12</sup>

Cognates:

Language contact:

### ***Rhipsalis* (Cactaceae)**

Spanish names: Injerto, solitaria, niguilla

Indigenous names: Paka hui'huat<sup>06</sup>; Xi'il boo'waat, xi'ixl uxum, weew i path uuf', tsakam pak'ak', okôlom te', kwathnab ts'aah<sup>07</sup>; Roq Ak'ach Q'eheh<sup>14</sup>

Used by (3\*): Totonac<sup>06</sup>; Huastec<sup>07</sup>; Quichean Maya<sup>14</sup>

Used for (10#): Cardiovascular<sup>07</sup>; Musculoskeletal<sup>07</sup>; Neurological<sup>07</sup>; Psychological<sup>07</sup>; Skin<sup>07, 14</sup>; Endocrine<sup>06</sup>; Urological<sup>07</sup>;

General and Unspecified<sup>07, 14</sup>

Cognates: Maya: ak'a;

Language contact: Tot <> Hua

### ***Rhododendron* (Ericaceae)**

Spanish names: Azalia blanca

Indigenous names:

Used by (1\*): Nahua<sup>26</sup>

Used for (1#): Respiratory<sup>26</sup>

Cognates:

Language contact:

### ***Rhodosciadium* (Apiaceae)**

Spanish names:

Indigenous names: Guiéer-ngüèets, xín-pèrèjil<sup>23</sup>

Used by (1\*): Zapotec<sup>23</sup>

Used for (1#): Urological<sup>23</sup>

Cognates:

Language contact:

### ***Rhus* (Anacardiaceae)**

Spanish names: Sal de venado; Zumaque

Indigenous names: Katxu ay<sup>03</sup>; Rtz'am mzat/kiej<sup>13</sup>; B'iritaq<sup>14</sup>; Yàg-bèch-mbăr<sup>23</sup>; Xín-bèch-mbăr<sup>23</sup>; Yàg-bèch-Isæb<sup>23</sup>

Used by (6\*): Zoque<sup>01, 03</sup>; Quichean Maya<sup>12, 13, 14</sup>; Zapotec<sup>23</sup>

Used for (15#): Digestive<sup>03, 14</sup>; Cardiovascular<sup>12</sup>; Musculoskeletal<sup>12, 13</sup>; Neurological<sup>12</sup>; Skin<sup>12, 13, 23</sup>; Urological<sup>03</sup>; Female genital<sup>03</sup>; General and Unspecified<sup>01, 12</sup>

Cognates:

Language contact:

### ***Rhynchosia* (Fabaceae)**

Spanish names: Ojo de picho

Indigenous names: Sinchu ixcuy<sup>03</sup>; Tsanakw'iil t'eel<sup>07</sup>

Used by (2\*): Zoque<sup>03</sup>; Huastec<sup>07</sup>

Used for (5#): Skin<sup>03, 07</sup>; Pregnancy<sup>03</sup>; Female genital<sup>03</sup>

Cognates:

Language contact:

### ***Rhynchospora* (Cyperaceae)**

Spanish names:

Indigenous names: Tathim toom<sup>07</sup>

Used by (1\*): Huastec<sup>07</sup>

Used for (1#): Digestive<sup>07</sup>

Cognates:

Language contact:

### ***Richardia* (Rubiaceae)**

Spanish names: Cola de Alacrán

Indigenous names:

Used by (1\*): Quichean Maya<sup>12</sup>

Used for (3#): Cardiovascular<sup>12</sup>; Musculoskeletal<sup>12</sup>; General and Unspecified<sup>12</sup>

Cognates:

Language contact:

### ***Ricinus* (Euphorbiaceae)**

Spanish names: Grilla, higuera; Higuera; Higuerrilla; Higuerrilla/higuera; Higuerrilla; Higuerrillo; Huerilla; Huigerilla; Rizino

Indigenous names: Kaslam tatki/kasy la wāngi/kasya wong<sup>01</sup>; Tätz kin/ tzäksy kin ay<sup>02</sup>; Nuku tsoy<sup>03</sup>; Tsak tsooy<sup>04</sup>;

Kastalan quajne<sup>05</sup>; Thikeela<sup>07</sup>; K'axtelenkh'et<sup>08</sup>; Xk'ooch<sup>09</sup>; ŠkotČ<sup>10</sup>; Ix k'o'och<sup>11</sup>; Azeta<sup>12</sup>; Acete<sup>13</sup>; Ch'apaky<sup>18</sup>; Yaga

huegu'u<sup>21</sup>; Baláp<sup>22</sup>; Yäg-bláp<sup>23</sup>; Xepowiwtl<sup>28</sup>

Used by (21\*): Zoque<sup>01, 02, 03</sup>; Mixe<sup>04</sup>; Totonac<sup>05, 06</sup>; Huastec<sup>07, 08</sup>; Yucatecan Maya<sup>09, 10, 11</sup>; Quichean Maya<sup>12, 13</sup>; Western

Maya<sup>18</sup>; Zapotec<sup>21, 22, 23</sup>; Nahua<sup>25, 26, 27, 28</sup>

Used for (65#): Blood<sup>12</sup>; Digestive<sup>01, 02, 04, 05, 06, 07, 08, 09, 12, 18, 21, 22, 23, 26, 27, 28</sup>; Eye<sup>13</sup>; Cardiovascular<sup>02</sup>; Musculoskeletal<sup>01, 02, 03, 12, 13,</sup>

<sup>23, 25</sup>; Neurological<sup>07, 08, 09, 10, 13, 22</sup>; Respiratory<sup>02, 07, 25, 26, 27</sup>; Skin<sup>01, 02, 03, 07, 21, 22</sup>; Urological<sup>02</sup>; Pregnancy<sup>01, 07, 13</sup>; Female genital<sup>01,</sup>

<sup>18</sup>; General and Unspecified<sup>01, 03, 04, 05, 07, 09, 10, 11, 12, 13, 18, 22, 25, 27, 28</sup>

Cognates:

Language contact:

### ***Rivina* (Phytolaccaceae)**

Spanish names: Baja tripa; Chilio; Colario

Indigenous names: Yawa niwi<sup>01</sup>; Masan ay<sup>03</sup>; Pinil štay<sup>05</sup>; Taa' t'ele', ts'amuxlaab ts'ohool, luuk, tsakam tsak tuthay,

tsakam k'ak'al xeklek<sup>07</sup>; Ikiche<sup>09</sup>; Baq'nel pim<sup>14</sup>

Used by (6\*): Zoque<sup>01, 03</sup>; Totonac<sup>05</sup>; Huastec<sup>07</sup>; Yucatecan Maya<sup>09</sup>; Quichean Maya<sup>14</sup>

Used for (19#): Digestive<sup>03, 05, 07, 14</sup>; Cardiovascular<sup>14</sup>; Musculoskeletal<sup>03, 14</sup>; Neurological<sup>14</sup>; Psychological<sup>14</sup>; Respiratory<sup>14</sup>;

Skin<sup>03, 07, 09, 14</sup>; Urological<sup>01</sup>; Pregnancy<sup>01</sup>; General and Unspecified<sup>05, 07, 14</sup>

Cognates:

Language contact:

### ***Roldana* (Asteraceae)**

Spanish names: Hierba / Hoja de Queso

Indigenous names: Tzyaptos<sup>01</sup>; Sup<sup>12</sup>

Used by (2\*): Zoque<sup>01</sup>; Quichean Maya<sup>12</sup>

Used for (3#): Respiratory<sup>01, 12</sup>; General and Unspecified<sup>12</sup>

Cognates:

Language contact:



### ***Rollinia* (Annonaceae)**

Spanish names: Anona

Indigenous names: Paj yatyi<sup>03</sup>

Used by (1\*): Zoque<sup>03</sup>

Used for (1#): Digestive<sup>03</sup>

Cognates:

Language contact:

### ***Ronabea* (Rubiaceae)**

Spanish names:

Indigenous names: Ix k'a anal macho<sup>11</sup>

Used by (1\*): Yucatecan Maya<sup>11</sup>

Used for (1#): Digestive<sup>11</sup>

Cognates:

Language contact:

### ***Rosa* (Rosaceae)**

Spanish names: Flor de concha, rosa concha; Flor roja/rosa/rosa de castilla/ rosa china, Rosa blanca/ rosa de concha; Isabelita; Rosa; Rosa Blanca; Rosa blanca/ de castilla; Rosa china; Rosa concha; Rosa de castill; Rosa de castilla; Rosa roja

Indigenous names: Tzapas jäyã, Popo jäyã<sup>01</sup>; Gloorya wits, k'iith wits<sup>07</sup>; Ran xux, arxux, anaxux<sup>13</sup>; Nich i blanca<sup>18</sup>; Nich i roja<sup>18</sup>; Nich i castilla<sup>18</sup>; U nich pat<sup>18</sup>; Guièe-rôs<sup>23</sup>

Used by (13\*): Zoque<sup>01, 02, 03</sup>; Huastec<sup>07</sup>; Yucatecan Maya<sup>09</sup>; Quichean Maya<sup>12, 13</sup>; Western Maya<sup>18</sup>; Zapotec<sup>21, 22, 23</sup>; Nahua<sup>26, 27</sup>

Used for (63#): Digestive<sup>01, 02, 03, 21, 22, 23, 26, 27</sup>; Eye<sup>01, 02, 03, 13, 18, 21, 22, 27</sup>; Ear<sup>01</sup>; Musculoskeletal<sup>01, 02</sup>; Neurological<sup>03, 12, 18</sup>; Psychological<sup>01, 03, 12, 18</sup>; Respiratory<sup>01, 02, 03, 07, 09, 18, 26</sup>; Skin<sup>02, 03, 13, 23, 27</sup>; Urological<sup>02</sup>; Pregnancy<sup>01, 23</sup>; Female genital<sup>02, 03, 21</sup>; Male genital<sup>02</sup>; General and Unspecified<sup>01, 02, 03, 07, 12, 13, 18, 21, 22, 23, 26</sup>

Cognates:

Language contact:

### ***Roseodendron* (Bignoniaceae)**

Spanish names: Primavera

Indigenous names:

Used by (1\*): Zoque<sup>01</sup>

Used for (1#): Musculoskeletal<sup>01</sup>

Cognates:

Language contact:

### ***Rosmarinus* (Lamiaceae)**

Spanish names: Romero

Indigenous names:

Used by (16\*): Zoque<sup>01, 02, 03</sup>; Mixe<sup>04</sup>; Totonac<sup>05</sup>; Huastec<sup>08</sup>; Yucatecan Maya<sup>09</sup>; Quichean Maya<sup>12, 13, 14</sup>; Western Maya<sup>19</sup>; Zapotec<sup>21, 22, 23</sup>; Nahua<sup>25, 28</sup>

Used for (50#): Blood<sup>12</sup>; Digestive<sup>01, 02, 08, 12, 21, 22, 25, 28</sup>; Cardiovascular<sup>12</sup>; Musculoskeletal<sup>02, 03, 08, 12, 23</sup>; Neurological<sup>12</sup>; Psychological<sup>03, 21</sup>; Respiratory<sup>01, 02, 12, 25, 28</sup>; Skin<sup>01, 08, 12, 25</sup>; Urological<sup>12</sup>; Pregnancy<sup>01, 02, 03, 09, 19, 21, 22, 23</sup>; Female genital<sup>01, 02, 12, 19</sup>; General and Unspecified<sup>01, 04, 05, 08, 12, 13, 14, 22, 23, 28</sup>

Cognates:

Language contact:

### ***Roupala* (Proteaceae)**

Spanish names: Palo de cucaracha

Indigenous names: Tʼkchicuy<sup>03</sup>

Used by (1\*): Zoque<sup>03</sup>

Used for (1#): Female genital<sup>03</sup>

Cognates:

Language contact:

### ***Rourea* (Connaraceae)**

Spanish names:

Indigenous names: It'iib chuch<sup>07</sup>

Used by (1\*): Huastec<sup>07</sup>

Used for (4#): Musculoskeletal<sup>07</sup>; Neurological<sup>07</sup>; Skin<sup>07</sup>; General and Unspecified<sup>07</sup>

Cognates:

Language contact:

### ***Rubus* (Rosaceae)**

Spanish names: Mora; Mora simarron/mora agria; Sarsamora; Zarzamora

Indigenous names: (Katzu) watzan<sup>01</sup>; Watzan<sup>01</sup>; Tocan<sup>12</sup>; Tucán<sup>13</sup>; Makom, makum<sup>20</sup>

Used by (4\*): Zoque<sup>01</sup>; Quichean Maya<sup>12, 13</sup>; Western Maya<sup>20</sup>

Used for (19#): Digestive<sup>01, 13, 20</sup>; Eye<sup>13</sup>; Musculoskeletal<sup>01</sup>; Psychological<sup>01</sup>; Respiratory<sup>12, 13, 20</sup>; Urological<sup>01</sup>; Male genital<sup>01</sup>; General and Unspecified<sup>01, 12, 13, 20</sup>

Cognates: Quich: token/tukan;

Language contact:

### ***Ruellia* (Acanthaceae)**

Spanish names: Cuamaite; Hierba de chivo/ barba de chivo

Indigenous names: Tzivo angbäk<sup>01</sup>; Tsus ay<sup>03</sup>; Poj ujts<sup>04</sup>; Lisakan<sup>05</sup>; Tsab k'a'um, pithomlaab ts'ohool, tsakam tsahib, tok ts'ohool, ebchil k'a'um, ts'itsimbe ts'ohool, bo' k'a'um<sup>07</sup>; Tsamnek muu, pohoth ts'ohool, eem muuw, xutsun bat'aw, uxum kw'ahiilom<sup>07</sup>; Kabalya'axnik<sup>09</sup>

Used by (6\*): Zoque<sup>01, 03</sup>; Mixe<sup>04</sup>; Totonac<sup>05</sup>; Huastec<sup>07</sup>; Yucatecan Maya<sup>09</sup>

Used for (16#): Blood<sup>07</sup>; Digestive<sup>03</sup>; Eye<sup>09</sup>; Musculoskeletal<sup>01</sup>; Neurological<sup>01, 07</sup>; Respiratory<sup>01</sup>; Skin<sup>03</sup>; Urological<sup>09</sup>; Pregnancy<sup>05</sup>; General and Unspecified<sup>01, 04, 07</sup>

Cognates:

Language contact:

### ***Rumex* (Polygonaceae)**

Spanish names: Lengua de vaca; Lengua de Vaca de Agua; Verdolaga

Indigenous names: Paasii' ma kaa't<sup>06</sup>; Aq'om Raq' Wakx<sup>12</sup>; Raqwax<sup>12</sup>; Raq' wak'as<sup>13</sup>; Blàg-dòoz<sup>23</sup>; Xocoquilitl<sup>26</sup>

Used by (5\*): Totonac<sup>06</sup>; Quichean Maya<sup>12, 13</sup>; Zapotec<sup>23</sup>; Nahua<sup>26</sup>

Used for (15#): Blood<sup>13</sup>; Digestive<sup>06, 12</sup>; Musculoskeletal<sup>23</sup>; Neurological<sup>23</sup>; Skin<sup>12, 23, 26</sup>; Urological<sup>12, 26</sup>; Pregnancy<sup>13</sup>; Female genital<sup>12</sup>; General and Unspecified<sup>12, 23</sup>

Cognates:

Language contact:

### ***Russelia* (Plantaginaceae)**

Spanish names: Barra de San Jose; Hoja de cerilla; Tronadora

Indigenous names: Kiñi nɣpin mooya<sup>03</sup>; Aneeymats<sup>04</sup>; Kutsiilte', kwayab an San Husee, thoot wits, toom wits, weeu koox<sup>07</sup>; Kwayab ts'aale, kutsiilte', ook' ts'een ts'ohool<sup>07</sup>; Siik'xiw, Oxletk'ax<sup>09</sup>; guish crii<sup>21</sup>

Used by (6\*): Zoque<sup>01, 03</sup>; Mixe<sup>04</sup>; Huastec<sup>07</sup>; Yucatecan Maya<sup>09</sup>; Zapotec<sup>21</sup>

Used for (13#): Digestive<sup>01, 03, 04</sup>; Skin<sup>03, 09, 21</sup>; Endocrine<sup>03</sup>; Urological<sup>03</sup>; Female genital<sup>03, 07</sup>; General and Unspecified<sup>04, 07</sup>

Cognates:

Language contact:

### ***Ruta* (Rutaceae)**

Spanish names: Ruda

Indigenous names: luta<sup>01</sup>; Wits'ii te' ts'ojol<sup>08</sup>; Rurá<sup>13</sup>; Tujiyan ixik<sup>19</sup>; Lula<sup>20</sup>; Rrûd<sup>23</sup>; Temalacatl<sup>28</sup>

Used by (20\*): Zoque<sup>01, 02, 03</sup>; Mixe<sup>04</sup>; Totonac<sup>06</sup>; Huastec<sup>08</sup>; Yucatecan Maya<sup>09, 11</sup>; Quichean Maya<sup>12, 13</sup>; Western Maya<sup>18, 19, 20</sup>; Zapotec<sup>21, 22, 23</sup>; Nahua<sup>25, 26, 27, 28</sup>

Used for (109#): Blood<sup>01, 12</sup>; Digestive<sup>01, 02, 03, 04, 06, 08, 09, 12, 13, 18, 20, 22, 23, 25, 26, 27, 28</sup>; Eye<sup>01, 21</sup>; Ear<sup>01, 02, 04, 08, 13</sup>; Cardiovascular<sup>01, 02, 12, 13, 18, 21, 23, 25</sup>; Musculoskeletal<sup>01, 02, 03, 08, 18, 19, 22, 28</sup>; Neurological<sup>01, 08, 09, 12, 13, 18, 19, 21, 22, 25, 27, 28</sup>; Psychological<sup>01, 02, 03, 08, 13, 18, 19, 22, 23, 27</sup>; Respiratory<sup>01, 08, 18, 19, 25, 27</sup>; Skin<sup>01, 02, 03, 08, 13, 18, 23</sup>; Urological<sup>02</sup>; Pregnancy<sup>02, 03, 04, 06, 13, 18, 22, 25, 26</sup>; Female genital<sup>01, 04, 06, 12, 13, 18</sup>; General and Unspecified<sup>01, 03, 06, 08, 11, 12, 13, 18, 19, 21, 22, 23, 25, 26, 27, 28</sup>

Cognates:

Language contact:

### ***Rytidostylis* (Cucurbitaceae)**

Spanish names: Hoja de carga

Indigenous names: Tzämi ay<sup>01</sup>

Used by (1\*): Zoque<sup>01</sup>

Used for (1#): General and Unspecified<sup>01</sup>

Cognates:

Language contact:

### ***Sabal* (Arecaceae)**

Spanish names: Cocobal; Guano; Palma real

Indigenous names: Jojo<sup>02</sup>; Ka'nal-xa'an<sup>09</sup>; Yopo'jojbal<sup>18</sup>; Xi'inaaj<sup>21</sup>

Used by (4\*): Zoque<sup>02</sup>; Yucatecan Maya<sup>09</sup>; Western Maya<sup>18</sup>; Zapotec<sup>21</sup>

Used for (6#): Digestive<sup>18</sup>; Musculoskeletal<sup>21</sup>; Skin<sup>21</sup>; Pregnancy<sup>02, 09</sup>; Female genital<sup>09</sup>

Cognates:

Language contact: Chimalapa Zoq <> Tabasco Chontal

### ***Sabicea* (Rubiaceae)**

Spanish names:

Indigenous names: Colaras<sup>16</sup>; T'u zub k'aham<sup>17</sup>

Used by (2\*): Quichean Maya<sup>16, 17</sup>

Used for (2#): Neurological<sup>16</sup>; nd<sup>17</sup>

Cognates:

Language contact:

### ***Saccharum* (Poaceae)**

Spanish names: Caña de azúcar

Indigenous names: Cha'ncat<sup>05</sup>; Cha'ncat<sup>06</sup>; Pakab<sup>07</sup>

Used by (3\*): Totonac<sup>05, 06</sup>; Huastec<sup>07</sup>

Used for (6#): Digestive<sup>06, 07</sup>; Neurological<sup>05</sup>; Respiratory<sup>05</sup>; Skin<sup>05</sup>; General and Unspecified<sup>06</sup>

Cognates:

Language contact:

### ***Sageretia* (Rhamnaceae)**

Spanish names: Espina de corona

Indigenous names: Masan kobak apitx<sup>03</sup>

Used by (2\*): Zoque<sup>01, 03</sup>

Used for (5#): Digestive<sup>03</sup>; Endocrine<sup>01</sup>; Urological<sup>03</sup>; Female genital<sup>03</sup>; General and Unspecified<sup>06</sup>

Cognates:

Language contact:

### ***Salix* (Salicaceae)**

Spanish names: Sauce; Taray

Indigenous names: Weksya<sup>02</sup>; Nø aweey<sup>04</sup>; Mak'astakat<sup>06</sup>; Tok'oy, hili te<sup>07</sup>; Skab'ya<sup>12</sup>; Sk'os<sup>13</sup>; Te'aj sausal<sup>18</sup>; Yàg-zhguìès<sup>23</sup>

Used by (9\*): Zoque<sup>02</sup>; Mixe<sup>04</sup>; Totonac<sup>06</sup>; Huastec<sup>07</sup>; Quichean Maya<sup>12, 13</sup>; Western Maya<sup>18</sup>; Zapotec<sup>21, 23</sup>

Used for (25#): Digestive<sup>21</sup>; Cardiovascular<sup>12</sup>; Musculoskeletal<sup>12, 21, 23</sup>; Neurological<sup>12, 18</sup>; Psychological<sup>02, 07, 23</sup>; Respiratory<sup>02</sup>; Skin<sup>04, 21, 23</sup>; Endocrine<sup>23</sup>; Urological<sup>02, 06</sup>; Pregnancy<sup>23</sup>; Female genital<sup>12</sup>; General and Unspecified<sup>02, 07, 12, 13, 21, 23</sup>

Cognates: MZ: we; Quich: skV;

Language contact:

### ***Salmea* (Asteraceae)**

Spanish names: Palo de chile; Rayanita

Indigenous names: Nas mupe<sup>02</sup>; Ix ts'aah, , it'iib to'ol, ix ch'aah<sup>07</sup>; Yagaguina'a<sup>21</sup>; Yàg-guìn, guìzh-yàg-guìn<sup>23</sup>

Used by (4\*): Zoque<sup>02</sup>; Huastec<sup>07</sup>; Zapotec<sup>21, 23</sup>

Used for (8#): Digestive<sup>02</sup>; Neurological<sup>07</sup>; Respiratory<sup>07, 21</sup>; Skin<sup>07, 21</sup>; General and Unspecified<sup>21, 23</sup>

Cognates: Zap: guin;

Language contact:

### ***Salpianthus* (Nyctaginaceae)**

Spanish names: Pie de paloma

Indigenous names: Guish pileej<sup>21</sup>

Used by (2\*): Zoque<sup>02</sup>; Zapotec<sup>21</sup>

Used for (5#): Digestive<sup>02</sup>; Musculoskeletal<sup>02</sup>; Female genital<sup>02</sup>; General and Unspecified<sup>02, 21</sup>

Cognates:

Language contact:

### ***Salvia* (Lamiaceae)**

Spanish names: Albahaca silvestre; Alúcema; Alucema, hierba del ciervo, flor azul; Alusema; Contrahierba; Flor de gorrión, salvia; Flor de Jericó; Limpia; Mirto; Pezuña de caballo, Uñas de caballo; Salvia; Salvia morada; Tlanchichinole; Verbena

Indigenous names: Tzuji ay<sup>01</sup>; Poja way cuy<sup>03</sup>; Tsus ay<sup>03</sup>; Møj ku'uk ujts<sup>04</sup>; Pategen ujts<sup>04</sup>; Makakašahuat<sup>05</sup>; Hut'ut' wits, uxum ts'ohool, wayma', witsal a k'iitsaa<sup>07</sup>; Chaktsits<sup>09</sup>; Xiix-k'ax, Chi-k'ak<sup>09</sup>; Chäk ta pek<sup>11</sup>; Ajob q'yes<sup>13</sup>; Tatz'na<sup>13</sup>; Zeh la<sup>22</sup>; Lüsêm<sup>23</sup>; Ncuàan-zân-làs<sup>23</sup>; Guièè-dzǐng, guìzh-dzǐng, guìzh-guìèè-dzǐng, guìèè-mèets<sup>23</sup>; Blàg-guitsiè, xín-lüzêm<sup>23</sup>; Tlanchichinole<sup>25</sup>; Tepechichia<sup>26</sup>; Tepechichia, ixcaxihuitl<sup>26</sup>; Tochimixochitl<sup>28</sup>

Used by (15\*): Zoque<sup>01, 03</sup>; Mixe<sup>04</sup>; Totonac<sup>05</sup>; Huastec<sup>07</sup>; Yucatecan Maya<sup>09, 11</sup>; Quichean Maya<sup>12, 13</sup>; Zapotec<sup>21, 22, 23</sup>; Nahua<sup>25, 26, 28</sup>

Used for (76#): Digestive<sup>01, 03, 05, 07, 09, 12, 13, 23, 25, 26, 28</sup>; Eye<sup>07</sup>; Ear<sup>05</sup>; Cardiovascular<sup>13</sup>; Musculoskeletal<sup>12, 13</sup>; Neurological<sup>12</sup>; Psychological<sup>07, 22, 23</sup>; Respiratory<sup>03, 05, 09, 12, 13</sup>; Skin<sup>03, 04, 09, 12, 13, 21, 22, 23, 25</sup>; Endocrine<sup>12</sup>; Urological<sup>12, 25</sup>; Pregnancy<sup>05, 07, 13, 22, 23</sup>; Female genital<sup>03, 07, 12, 13, 23</sup>; Male genital<sup>12</sup>; General and Unspecified<sup>03, 05, 09, 11, 12, 13, 23, 26, 28</sup>

Cognates: Yuc: chäk/chak; Zap: zeh la / zan la; Nah: chichi;

Language contact:

### ***Sambucus* (Adoxaceae)**

Spanish names: Flor de sacuo; Flor de sauco; Saucó

Indigenous names: Okok yui/ok yui/ä'ju rane<sup>01</sup>; Toxeem<sup>04</sup>; Toxiba, tokxihua, toqsiwi, toquiwa<sup>05</sup>; Sawko<sup>07</sup>; Tunay' che', tzoloj' che', Tunayche' Aq'om<sup>12</sup>; Zoloji, shiij, tz'olój che', xubam<sup>13</sup>; Yop'aj sauk'u<sup>18</sup>; Ch'ijil te<sup>20</sup>; Yàg-saûz, yàzmîn<sup>23</sup>; Xometl<sup>26</sup>; Xometl<sup>28</sup>

Used by (16\*): Zoque<sup>01, 02, 03</sup>; Mixe<sup>04</sup>; Totonac<sup>05</sup>; Huastec<sup>07</sup>; Quichean Maya<sup>12, 13</sup>; Western Maya<sup>18, 20</sup>; Zapotec<sup>21, 22, 23</sup>; Nahua<sup>25, 26, 28</sup>

Used for (75#): Blood<sup>01, 03</sup>; Digestive<sup>01, 02, 03, 05, 13, 20, 25, 26</sup>; Eye<sup>01, 21, 22</sup>; Cardiovascular<sup>12, 25</sup>; Musculoskeletal<sup>01, 02, 05, 12, 13, 21</sup>; Neurological<sup>01, 02, 03, 12, 25</sup>; Psychological<sup>01, 05, 18</sup>; Respiratory<sup>01, 02, 03, 04, 05, 07, 12, 13, 18, 23, 25, 26, 28</sup>; Skin<sup>01, 02, 03, 05, 12, 13, 21, 22, 28</sup>; Urological<sup>02, 12, 13</sup>; Pregnancy<sup>05, 13</sup>; Female genital<sup>02, 03, 12, 13, 21</sup>; Male genital<sup>02, 12</sup>; General and Unspecified<sup>01, 02, 03, 05, 12, 13, 18, 21, 25, 26, 28</sup>

Cognates: Nah: xometl;

Language contact: Mixe <> Tot <> K'iche'

### ***Samolus* (Primulaceae)**

Spanish names:

Indigenous names: Tsunya'hi<sup>09</sup>; Ncuàan-dzéb-nquits<sup>23</sup>

Used by (2\*): Yucatecan Maya<sup>09</sup>; Zapotec<sup>23</sup>

Used for (4#): Musculoskeletal<sup>09</sup>; Respiratory<sup>09</sup>; Skin<sup>09</sup>; General and Unspecified<sup>23</sup>

Cognates:

Language contact:

### ***Samyda* (Salicaceae)**

Spanish names:

Indigenous names: Naranja che<sup>09</sup>

Used by (1\*): Yucatecan Maya<sup>09</sup>

Used for (2#): Skin<sup>09</sup>; Endocrine<sup>09</sup>

Cognates:

Language contact:

### ***Sanchezia* (Acanthaceae)**

Spanish names: Pavo Real

Indigenous names: Xjolom Chaqmut (Sak)<sup>14</sup>

Used by (2\*): Quichean Maya<sup>12, 14</sup>

Used for (2#): Musculoskeletal<sup>12</sup>; General and Unspecified<sup>14</sup>

Cognates:

Language contact:

### ***Sansevieria* (Asparagaceae)**

Spanish names: Cola de tigre; Curalina; Curarina

Indigenous names: Tzikin o<sup>01</sup>; Txikiña<sup>03</sup>; Nej baläm<sup>18</sup>

Used by (8\*): Zoque<sup>01, 02, 03</sup>; Yucatecan Maya<sup>11</sup>; Quichean Maya<sup>12, 13</sup>; Western Maya<sup>18, 19</sup>

Used for (16#): Digestive<sup>01, 13</sup>; Cardiovascular<sup>13</sup>; Musculoskeletal<sup>18</sup>; Neurological<sup>13, 19</sup>; Skin<sup>01, 02, 03, 12, 13, 19</sup>; General and Unspecified<sup>11, 12, 13, 19</sup>

Cognates:

Language contact:

### ***Sanvitalia* (Asteraceae)**

Spanish names: Hoja de azar

Indigenous names: Tza'a tzoj<sup>01</sup>

Used by (1\*): Zoque<sup>01</sup>

Used for (1#): General and Unspecified<sup>01</sup>

Cognates:

Language contact:

### ***Sapindus* (Sapindaceae)**

Spanish names: Jaboncillo

Indigenous names: Tsukma<sup>03</sup>; Walul<sup>07</sup>; Bijpij<sup>21</sup>

Used by (3\*): Zoque<sup>03</sup>; Huastec<sup>07</sup>; Zapotec<sup>21</sup>

Used for (5#): Digestive<sup>07</sup>; Skin<sup>03, 21</sup>; General and Unspecified<sup>07, 21</sup>

Cognates:

Language contact:

### ***Sapranthus* (Annonaceae)**

Spanish names:

Indigenous names: Chuyu chajum, sakelemuy<sup>09</sup>

Used by (1\*): Yucatecan Maya<sup>09</sup>

Used for (1#): Urological<sup>09</sup>

Cognates:

Language contact:

### ***Sarcoglottis* (Orchidaceae)**

Spanish names:

Indigenous names: Ts'ik'aach ts'ohool<sup>07</sup>

Used by (1\*): Huastec<sup>07</sup>

Used for (1#): Pregnancy<sup>07</sup>

Cognates:

Language contact:

### ***Saurauia* (Actinidiaceae)**

Spanish names: Llorasangre hembra

Indigenous names: Q'ayis Aq'om Kik' Ixoq<sup>12</sup>

Used by (1\*): Quichean Maya<sup>12</sup>

Used for (8#): Digestive<sup>12</sup>; Cardiovascular<sup>12</sup>; Musculoskeletal<sup>12</sup>; Neurological<sup>12</sup>; Respiratory<sup>12</sup>; Endocrine<sup>12</sup>; Urological<sup>12</sup>; General and Unspecified<sup>12</sup>

Cognates:

Language contact:

### ***Schinus* (Anacardiaceae)**

Spanish names: Coabino, pirul; Pirú; Pirul

Indigenous names: Ya Iuj<sup>22</sup>; Yág-pirúl<sup>23</sup>; Peloncuáhuil<sup>28</sup>

Used by (4\*): Zapotec<sup>22, 23</sup>; Nahua<sup>27, 28</sup>

Used for (11#): Digestive<sup>22</sup>; Eye<sup>22</sup>; Musculoskeletal<sup>23</sup>; Neurological<sup>22</sup>; Respiratory<sup>28</sup>; Skin<sup>22</sup>; Pregnancy<sup>22, 27</sup>; General and Unspecified<sup>22, 27, 28</sup>

Cognates:

Language contact:

### ***Schinus* (Anacardiaceae)**

Spanish names: Pirul

Indigenous names:

Used by (1\*): Zoque<sup>02</sup>

Used for (1#): General and Unspecified<sup>02</sup>

Cognates:

Language contact:

### ***Schistocarpha* (Asteraceae)**

Spanish names:

Indigenous names: Pänpäm<sup>01</sup>; Sununkil Q'eheh, Jolam Pek Q'eheh<sup>14</sup>

Used by (3\*): Zoque<sup>01, 03</sup>; Quichean Maya<sup>14</sup>

Used for (5#): Musculoskeletal<sup>01, 14</sup>; Neurological<sup>14</sup>; Respiratory<sup>14</sup>; Skin<sup>03</sup>

Cognates:

Language contact:

### ***Schkuhria* (Asteraceae)**

Spanish names: Hierba del vendao

Indigenous names: Its'amal ts'ojol<sup>08</sup>; Gbày<sup>23</sup>

Used by (2\*): Huastec<sup>08</sup>; Zapotec<sup>23</sup>

Used for (5#): Digestive<sup>08</sup>; Musculoskeletal<sup>08</sup>; Neurological<sup>08</sup>; Skin<sup>08, 23</sup>

Cognates:

Language contact:

### ***Schoenocaulon* (Melanthiaceae)**

Spanish names:

Indigenous names: Tsuk tyiñ<sup>03</sup>; Sebadiya<sup>07</sup>

Used by (2\*): Zoque<sup>03</sup>; Huastec<sup>07</sup>

Used for (2#): Skin<sup>03, 07</sup>

Cognates:

Language contact:

### ***Schoepfia* (Schoepfiaceae)**

Spanish names:

Indigenous names: Its'am te', yax ich'am te'<sup>07</sup>

Used by (1\*): Huastec<sup>07</sup>

Used for (3#): Digestive<sup>07</sup>; Neurological<sup>07</sup>; Pregnancy<sup>07</sup>

Cognates:

Language contact:

### ***Schrankia* (Fabaceae)**

Spanish names:

Indigenous names: Tsakam tsobeem<sup>07</sup>

Used by (1\*): Huastec<sup>07</sup>

Used for (2#): Neurological<sup>07</sup>; Psychological<sup>07</sup>

Cognates:

Language contact:

### ***Scindapsus* (Araceae)**

Spanish names:

Indigenous names: Kuax' Kay<sup>14</sup>

Used by (1\*): Quichean Maya<sup>14</sup>

Used for (3#): Neurological<sup>14</sup>; Psychological<sup>14</sup>; General and Unspecified<sup>14</sup>

Cognates:

Language contact:

### ***Scleria* (Cyperaceae)**

Spanish names:

Indigenous names: Neiuk<sup>03</sup>; Møøy<sup>04</sup>; T'oyol toom t'unu', kotox toom, tsakam k'iithath toom, tathiim toom<sup>07</sup>; Xoknoon<sup>09</sup>

Used by (4\*): Zoque<sup>03</sup>; Mixe<sup>04</sup>; Huastec<sup>07</sup>; Yucatecan Maya<sup>09</sup>

Used for (8#): Digestive<sup>03, 04, 07</sup>; Respiratory<sup>09</sup>; Skin<sup>07</sup>; Pregnancy<sup>03</sup>; Female genital<sup>04</sup>; General and Unspecified<sup>07</sup>

Cognates:

Language contact:

### **Scoparia (Plantaginaceae)**

Spanish names: Cilandrillo; Cilantrillo; Escobillo

Indigenous names: Naax Podeey<sup>04</sup>; Kulantr pim<sup>14</sup>

Used by (5\*): Zoque<sup>03</sup>; Mixe<sup>04</sup>; Quichean Maya<sup>14, 15</sup>; Western Maya<sup>18</sup>

Used for (9#): Digestive<sup>04, 14, 18</sup>; Neurological<sup>03</sup>; Skin<sup>03, 04, 14</sup>; Pregnancy<sup>15</sup>; Female genital<sup>03</sup>

Cognates:

Language contact:

### **Scutellaria (Lamiaceae)**

Spanish names: Orozuz

Indigenous names: Elbeenax ts'phool, waylom ts'ohool, chakam kuch, t'ot ich ch'ohool, chakam thoot<sup>07</sup>; Balsamo xiw<sup>09</sup>

Used by (2\*): Huastec<sup>07</sup>; Yucatecan Maya<sup>09</sup>

Used for (4#): Digestive<sup>07, 09</sup>; Cardiovascular<sup>07</sup>; General and Unspecified<sup>07</sup>

Cognates:

Language contact:

### **Sechium (Cucurbitaceae)**

Spanish names: Chayote; Espino, chayote; Guisquil; Huisquil

Indigenous names: Awin pa'sun/apit pa'sun/ awit pa'sun/ pa'sun<sup>01</sup>; Apit<sup>02</sup>; Cuy pasun<sup>03</sup>; A'xaa<sup>04</sup>; Choyotesel, spup, malsh tu'kun<sup>06</sup>; Tsiw', chiw<sup>07</sup>; Pak'a Q'ix<sup>12</sup>; Q'ix<sup>13</sup>; Chijch'um<sup>18</sup>; Balagayaappa<sup>21</sup>; Chayote<sup>25</sup>

Used by (11\*): Zoque<sup>01, 02, 03</sup>; Mixe<sup>04</sup>; Totonac<sup>06</sup>; Huastec<sup>07</sup>; Quichean Maya<sup>12, 13</sup>; Western Maya<sup>18</sup>; Zapotec<sup>21</sup>; Nahua<sup>25</sup>

Used for (24#): Digestive<sup>01, 04, 12</sup>; Cardiovascular<sup>01, 06, 18</sup>; Musculoskeletal<sup>03</sup>; Psychological<sup>21</sup>; Skin<sup>01, 02, 12, 13</sup>; Endocrine<sup>25</sup>;

Urological<sup>01, 02, 03, 06, 07, 25</sup>; Pregnancy<sup>01, 03</sup>; General and Unspecified<sup>01, 03, 21</sup>

Cognates: MZ: awit/apit/a'xaa; Zoq: awit/apit, pasun; Maya: q'ix/chiw/chij; Quich: q'ix;

Language contact:

### **Securidaca (Polygalaceae)**

Spanish names: Balsamillo; Tripa de gallo

Indigenous names: Kipats ay<sup>03</sup>; Mamaal tsan, nuuk bichim, umuw tsaah, anuts bichim, , manil pet<sup>07</sup>; Se' ru' k'an tyaj; ch'up k'an tyaj<sup>17</sup>

Used by (4\*): Zoque<sup>02, 03</sup>; Huastec<sup>07</sup>; Quichean Maya<sup>17</sup>

Used for (8#): Digestive<sup>03</sup>; Musculoskeletal<sup>07</sup>; Neurological<sup>07</sup>; Respiratory<sup>02</sup>; Skin<sup>03, 07</sup>; General and Unspecified<sup>03</sup>; nd<sup>17</sup>

Cognates:

Language contact:

### **Sedum (Crassulaceae)**

Spanish names: Cola de chivo; Siempreviva

Indigenous names: Ujey chij<sup>13</sup>; Guièe-yùzh<sup>23</sup>; Yahualchit<sup>25</sup>

Used by (4\*): Totonac<sup>05</sup>; Quichean Maya<sup>13</sup>; Zapotec<sup>23</sup>; Nahua<sup>25</sup>

Used for (6#): Eye<sup>13</sup>; Skin<sup>23, 25</sup>; Female genital<sup>25</sup>; General and Unspecified<sup>05, 25</sup>

Cognates:

Language contact:

### **Selaginella (Selaginellaceae)**

Spanish names: Doradilla; Flor de piedra; Hiedra de Piedra; Hoja vishu; Pelo de Hombre primitivo; Siempre viva; Siempre viva, doradilla; Siemprevivo

Indigenous names: Chuklaab ts'ohool, tsakam ts'uh, muthlum ichiich, tsaakuy ts'ohool, ts'ohoolil k'aninmiin, yoxon, mul ichiich<sup>07</sup>; Mooch-tut<sup>09</sup>; Kumatzin Q'os Abäj<sup>12</sup>; Rismal xilik<sup>14</sup>; Guìzh-yùzh<sup>23</sup>

Used by (11\*): Zoque<sup>02, 03</sup>; Huastec<sup>07</sup>; Yucatecan Maya<sup>09</sup>; Quichean Maya<sup>12, 14, 16, 17</sup>; Zapotec<sup>23</sup>; Nahua<sup>26, 27</sup>

Used for (22#): Digestive<sup>12</sup>; Neurological<sup>14, 16</sup>; Psychological<sup>16, 23</sup>; Skin<sup>02, 07, 12</sup>; Endocrine<sup>26</sup>; Urological<sup>09, 27</sup>; Pregnancy<sup>02</sup>; Female genital<sup>03, 12</sup>; Male genital<sup>12</sup>; General and Unspecified<sup>03, 07, 12, 16, 23</sup>; nd<sup>17</sup>

Cognates:

Language contact:



### ***Selenicereus* (Cactaceae)**

Spanish names: Pitaya

Indigenous names: Bohol tsatsa<sup>07</sup>; Tsaran-ak<sup>09</sup>

Used by (3\*): Zoque<sup>03</sup>; Huastec<sup>07</sup>; Yucatecan Maya<sup>09</sup>

Used for (6#): Neurological<sup>07</sup>; Skin<sup>03, 09</sup>; Pregnancy<sup>07</sup>; Female genital<sup>09</sup>; General and Unspecified<sup>07</sup>

Cognates:

Language contact:

### ***Semialarium* (Celastraceae)**

Spanish names: Cancerina; Canserina

Indigenous names: Sak-bo'ob. Xooknom<sup>09</sup>

Used by (4\*): Zoque<sup>03</sup>; Yucatecan Maya<sup>09</sup>; Quichean Maya<sup>12</sup>; Zapotec<sup>21</sup>

Used for (10#): Digestive<sup>12, 21</sup>; Respiratory<sup>09</sup>; Skin<sup>21</sup>; Urological<sup>03, 12</sup>; Female genital<sup>03, 12, 21</sup>; General and Unspecified<sup>12</sup>

Cognates:

Language contact:

### ***Senecio* (Asteraceae)**

Spanish names: Azumiate; Chilca; Hierba de borracho

Indigenous names: Ak monhgu tzyay/ ak manhgu tzyay<sup>01</sup>; Meteba<sup>12</sup>; Chijob<sup>13</sup>; Guizh-diâg-bûrr<sup>23</sup>; Tzompiltecle<sup>26</sup>; Axochitl<sup>28</sup>

Used by (6\*): Zoque<sup>01</sup>; Quichean Maya<sup>12, 13</sup>; Zapotec<sup>23</sup>; Nahua<sup>26, 28</sup>

Used for (21#): Blood<sup>12</sup>; Digestive<sup>12, 13, 26</sup>; Cardiovascular<sup>12</sup>; Musculoskeletal<sup>12, 13</sup>; Neurological<sup>12</sup>; Psychological<sup>12</sup>; Respiratory<sup>12</sup>; Skin<sup>13, 28</sup>; Urological<sup>12</sup>; Pregnancy<sup>13</sup>; Female genital<sup>13, 26</sup>; General and Unspecified<sup>01, 12, 13, 23, 28</sup>

Cognates:

Language contact:

### ***Senna* (Fabaceae)**

Spanish names: Barajo; Cachinbal; Cerilla; Flor de abejón; Flor de San José; Flor de todos santos; Frijolillo; Frijolillo (arbol); Frijolillo del monte; Hierba de zopilote; Hoja sen; Hormiguera, pico de pájaro, hormiguillo; Palo Santiago; Taratana; Todos los santos amarillo

Indigenous names: Syäk mätzyi<sup>02</sup>; Ku'tzum kuy<sup>02</sup>; Chuch acuy<sup>03</sup>; Uaxiñ<sup>03</sup>; MꞤk stogoy<sup>03</sup>; Putx tsay<sup>03</sup>; Putx tsay<sup>03</sup>; KꞤ mooya<sup>03</sup>; Pa xuxk<sup>04</sup>; Poop tsina'an<sup>04</sup>; Bichaam ts'ohool, witsaap ch'ohool<sup>07</sup>; Kaxiy ts'ihol<sup>07</sup>; Itsaan an bichaam<sup>07</sup>; Tsuleek' ekwet, bichaam te', xamxam<sup>07</sup>; Loolte<sup>07</sup>; K'anchik'in-ak<sup>09</sup>; Mehenbu'ul-xiw<sup>09</sup>; Tu'ha'abin<sup>09</sup>; Saalche', Boxsaal<sup>09</sup>; Kaxlan, Xche Kaxlan<sup>14</sup>; Linaq Q'eheh<sup>14</sup>; Kara'bansi che<sup>16</sup>; Bajero pim<sup>17</sup>; Carabans i che<sup>17</sup>; Yopo sen<sup>18</sup>; U mul xinich<sup>18</sup>; Taratana<sup>18</sup>; B'u'r k'opot<sup>19</sup>; Bizandxa'a gueexii<sup>21</sup>; Bizandxa'a<sup>21</sup>; Guixa'a mbisundxi<sup>21</sup>; Guièe-mzhòodz, guizh-mzhòod, guièe-nguládz, guizh-nguládz, x-guizh-nguládz, guièe-sàn-wsé, guièe-yòob-chèn, yàg-guièe-nguëts<sup>23</sup>; Higiacxihuitl<sup>28</sup>

Used by (17\*): Zoque<sup>01, 02, 03</sup>; Mixe<sup>04</sup>; Huastec<sup>07</sup>; Yucatecan Maya<sup>09, 10, 11</sup>; Quichean Maya<sup>14, 15, 16, 17</sup>; Western Maya<sup>18, 19</sup>; Zapotec<sup>21, 23</sup>; Nahua<sup>28</sup>

Used for (86#): Blood<sup>14</sup>; Digestive<sup>02, 03, 07, 09, 14, 18, 21</sup>; Eye<sup>19</sup>; Ear<sup>03</sup>; Cardiovascular<sup>07</sup>; Musculoskeletal<sup>03, 07, 09, 21</sup>; Neurological<sup>03, 07, 18</sup>; Psychological<sup>07, 16</sup>; Respiratory<sup>03, 04, 07, 18, 21</sup>; Skin<sup>01, 03, 07, 09, 11, 14, 18, 21, 23, 28</sup>; Pregnancy<sup>07</sup>; Female genital<sup>02, 03, 14, 15</sup>; General and Unspecified<sup>03, 04, 07, 10, 11, 19, 21, 23, 28</sup>; nd<sup>17</sup>

Cognates:

Language contact:

### ***Serjania* (Sapindaceae)**

Spanish names: Gulandrina; Tres costilla; Tres lomos

Indigenous names: Tukas Tzayapak<sup>01</sup>; Popo pujkuy poj<sup>02</sup>; Aki tiuts ay<sup>03</sup>; Tsank'ub ts'ohool, wal puchun<sup>07</sup>; Riagshinguish<sup>21</sup>

Used by (5\*): Zoque<sup>01, 02, 03</sup>; Huastec<sup>07</sup>; Zapotec<sup>21</sup>

Used for (14#): Digestive<sup>01, 02, 03, 07, 21</sup>; Musculoskeletal<sup>01</sup>; Neurological<sup>03, 07</sup>; Skin<sup>03, 07</sup>; Urological<sup>01</sup>; Female genital<sup>03</sup>; Male genital<sup>02</sup>; General and Unspecified<sup>01</sup>

Cognates:

Language contact: Chimalapa Zoq <> Hua

### **Sesamum (Pedaliaceae)**

Spanish names: Ajonjoli

Indigenous names: Talhtzi'nqui'hui, aa'juliim, cu'li'm, zin'qui'hui<sup>06</sup>

Used by (3\*): Totonac<sup>06</sup>; Quichean Maya<sup>12</sup>; Zapotec<sup>21</sup>

Used for (6#): Digestive<sup>12</sup>; Skin<sup>12</sup>; Urological<sup>12</sup>; Pregnancy<sup>06</sup>; General and Unspecified<sup>12, 21</sup>

Cognates:

Language contact:

### **Setaria (Poaceae)**

Spanish names:

Indigenous names: Weew ok<sup>07</sup>; Ch'upil Q'ehen<sup>14</sup>

Used by (2\*): Huastec<sup>07</sup>; Quichean Maya<sup>14</sup>

Used for (2#): Neurological<sup>07</sup>; Female genital<sup>14</sup>

Cognates:

Language contact:

### **Sicydium (Cucurbitaceae)**

Spanish names:

Indigenous names: Chakmots-ak', Hoykep, Saloli-ak', Cbikimu-ik<sup>09</sup>; Pak il<sup>11</sup>; Xsantii ajpaq, Santii' Aj Paq<sup>14</sup>

Used by (3\*): Yucatecan Maya<sup>09, 11</sup>; Quichean Maya<sup>14</sup>

Used for (5#): Eye<sup>09</sup>; Cardiovascular<sup>14</sup>; Psychological<sup>11</sup>; Skin<sup>09</sup>; General and Unspecified<sup>11</sup>

Cognates: CoreM: pak;

Language contact:

### **Sida (Malvaceae)**

Spanish names: Escoba; Escobillo; Escobillo Hembra; Escobillo Macho; Malva (chica); Malva (de puerco); Malva blanca; Malva blanca/ amarilla; Malva de cochino; Malva negra; Malvarisco/ malva hembra; Malvavisco

Indigenous names: Kung pet kuy/tung'an petkuy/kan tane/kan petkuy/ tãm petkuy/pat petkuy/paj petkuy<sup>01</sup>; Ta'petkuy<sup>02</sup>; Yoya malva<sup>03</sup>; Poop tukats<sup>04</sup>; Tsap tukaats<sup>04</sup>; Thak thipon<sup>07</sup>; Chichibe<sup>09</sup>; Pasmari xiw<sup>09</sup>; Meseb'äl Q'os Aqom<sup>12</sup>; Mezbel q'ais<sup>12</sup>; Mesb'al<sup>13</sup>; Mesb'eel, Mes'uul<sup>14</sup>; Mesbel<sup>15</sup>; Mes' b'eel<sup>17</sup>; Tzatzal mes<sup>20</sup>; Lexuba'a nagatzii/ gutzii<sup>21</sup>; Màlbàriscw<sup>23</sup>; Tlanexahuiltzi<sup>26</sup>

Used by (16\*): Zoque<sup>01, 02, 03</sup>; Mixe<sup>04</sup>; Huastec<sup>07</sup>; Yucatecan Maya<sup>09</sup>; Quichean Maya<sup>12, 13, 14, 15, 17</sup>; Western Maya<sup>18, 20</sup>; Zapotec<sup>21, 23</sup>; Nahua<sup>26</sup>

Used for (78#): Blood<sup>12</sup>; Digestive<sup>01, 02, 03, 07, 09, 12, 14, 18, 20, 26</sup>; Musculoskeletal<sup>01, 02, 03, 21, 26</sup>; Neurological<sup>02, 04</sup>; Psychological<sup>03</sup>; Respiratory<sup>01, 03, 12, 18, 23</sup>; Skin<sup>01, 02, 03, 04, 07, 09, 12, 13, 14, 21, 26</sup>; Endocrine<sup>02</sup>; Urological<sup>01, 03, 12, 15</sup>; Pregnancy<sup>01, 02, 13, 14, 15, 21, 23</sup>; Female genital<sup>02, 03, 12, 21</sup>; Male genital<sup>02</sup>; General and Unspecified<sup>01, 02, 03, 04, 09, 12, 13, 21, 23, 26</sup>; nd<sup>17</sup>

Cognates: Zoq: petkuy; CoreM: mes; Quich: mesbel;

Language contact:

### **Sidastrum (Malvaceae)**

Spanish names:

Indigenous names:

Used by (1\*): Zoque<sup>03</sup>

Used for (1#): Digestive<sup>03</sup>

Cognates:

Language contact:

### **Sideroxylon (Sapotaceae)**

Spanish names: Tempisque

Indigenous names:

Used by (1\*): Quichean Maya<sup>12</sup>

Used for (2#): Cardiovascular<sup>12</sup>; General and Unspecified<sup>12</sup>

Cognates:

Language contact:

### ***Silybum* (Asteraceae)**

Spanish names: Cardo Maria, Cardo Silvestre

Indigenous names:

Used by (1\*): Quichean Maya<sup>12</sup>

Used for (7#): Blood<sup>12</sup>; Digestive<sup>12</sup>; Musculoskeletal<sup>12</sup>; Neurological<sup>12</sup>; Psychological<sup>12</sup>; Endocrine<sup>12</sup>; Urological<sup>12</sup>

Cognates:

Language contact:

### ***Simaba* (Simaroubaceae)**

Spanish names: Cedrón

Indigenous names:

Used by (5\*): Zoque<sup>01, 02, 03</sup>; Western Maya<sup>19</sup>; Zapotec<sup>21</sup>

Used for (10#): Digestive<sup>01, 03, 19</sup>; Musculoskeletal<sup>21</sup>; Skin<sup>01, 02, 03, 21</sup>; General and Unspecified<sup>01, 03</sup>

Cognates:

Language contact:

### ***Simarouba* (Simaroubaceae)**

Spanish names: Aceituno; Negrito

Indigenous names: Passac<sup>10</sup>; Pa'sa'ak<sup>11</sup>

Used by (3\*): Yucatecan Maya<sup>10, 11</sup>; Western Maya<sup>19</sup>

Used for (3#): Digestive<sup>10, 11, 19</sup>

Cognates: Yuc: pasak;

Language contact:

### ***Simira* (Rubiaceae)**

Spanish names: Nazareno rojo

Indigenous names:

Used by (1\*): Zoque<sup>03</sup>

Used for (5#): Blood<sup>03</sup>; Digestive<sup>03</sup>; Musculoskeletal<sup>03</sup>; Skin<sup>03</sup>; Female genital<sup>03</sup>

Cognates:

Language contact:

### ***Sinapis* (Brassicaceae)**

Spanish names: Mostaza

Indigenous names:

Used by (1\*): Zoque<sup>03</sup>

Used for (1#): Psychological<sup>03</sup>

Cognates:

Language contact:

### ***Sinclairia* (Asteraceae)**

Spanish names:

Indigenous names: Luisa ay<sup>03</sup>

Used by (1\*): Zoque<sup>03</sup>

Used for (2#): Respiratory<sup>03</sup>; Skin<sup>03</sup>

Cognates:

Language contact:

### ***Sinningia* (Gesneriaceae)**

Spanish names:

Indigenous names: Ujts køjk<sup>04</sup>

Used by (1\*): Mixe<sup>04</sup>

Used for (2#): Digestive<sup>04</sup>; Pregnancy<sup>04</sup>

Cognates:

Language contact:

### ***Siparuna* (Siparunaceae)**

Spanish names: Hoja de tigre; Hoja de zopilote, hoje mixe, negra; Hoja de zorro/hoja de zorrillo/ hoja de tigre

Indigenous names: Kun tzyantzyan/kun tzantzan/ ku tzantzan/ wekpa tane<sup>01</sup>; Tzantzan tuj kuy<sup>02</sup>; Tzan tsan ay<sup>03</sup>;

Atsømts'i'ixy<sup>04</sup>; Chu' Che'<sup>14</sup>; Roq xa'an, co moj che<sup>16</sup>; Balagamixii<sup>21</sup>

Used by (7\*): Zoque<sup>01, 02, 03</sup>; Mixe<sup>04</sup>; Quichean Maya<sup>14, 16</sup>; Zapotec<sup>21</sup>

Used for (29#): Blood<sup>03, 14</sup>; Digestive<sup>03</sup>; Eye<sup>02, 14</sup>; Cardiovascular<sup>01</sup>; Musculoskeletal<sup>01, 02, 03, 14, 21</sup>; Neurological<sup>01, 03, 14, 16</sup>;

Psychological<sup>01</sup>; Respiratory<sup>01, 04, 14</sup>; Skin<sup>03, 21</sup>; Pregnancy<sup>01, 03</sup>; Female genital<sup>21</sup>; General and Unspecified<sup>01, 03, 04, 14, 21</sup>

Cognates: MZ: tsan/tsäm; Zoq: tsantsan;

Language contact:

### ***Smallanthus* (Asteraceae)**

Spanish names: Flor de margarita; Mano de león

Indigenous names: Ko'son<sup>01</sup>; K'ail, p'ilix momol, balam k'in<sup>20</sup>

Used by (3\*): Zoque<sup>01</sup>; Western Maya<sup>20</sup>; Nahua<sup>25</sup>

Used for (6#): Digestive<sup>20, 25</sup>; Skin<sup>01, 20</sup>; Female genital<sup>20</sup>; General and Unspecified<sup>01</sup>

Cognates:

Language contact:

### ***Smilax* (Smilacaceae)**

Spanish names: Axquiate, Guatotole; Bigotes de cozol; Cocolmeca; Cocolmeca (de hoja chica); Cocolmeca (de hoja larga); Diente de chucho, sarzaparilla, bejuco de vida; Diente de perro/sarzaparilla; Sarsa; Tumba vaquero; Zarzaparilla; Zarzaparilla hembra; Zarzaparilla, barbasco

Indigenous names: Tuwi tätz<sup>01</sup>; Tzujus poj<sup>02</sup>; Mäm ma'si<sup>02</sup>; Mom<sup>03</sup>; Tuutk kopk aats<sup>04</sup>; Ajni mayak<sup>05</sup>; Kantzilil<sup>05</sup>; Can'ci'lil<sup>06</sup>;

Weew uut', kwayab uut', uut' ts'aah<sup>07</sup>; Q'ix Q'ul, Qaynäq Chaklaj Aq'om<sup>12</sup>; Salcha'ak Aq'om<sup>12</sup>; Q'ul<sup>12</sup>; K'ul<sup>13</sup>; Q'ix pim<sup>14</sup>; Chub Ixim<sup>15</sup>; Cocolmecate<sup>26</sup>

Used by (13\*): Zoque<sup>01, 02, 03</sup>; Mixe<sup>04</sup>; Totonac<sup>05, 06</sup>; Huastec<sup>07</sup>; Quichean Maya<sup>12, 13, 14, 15</sup>; Zapotec<sup>21</sup>; Nahua<sup>26</sup>

Used for (73#): Blood<sup>03, 12, 13, 14, 26</sup>; Digestive<sup>02, 03, 04, 05, 06, 07, 13</sup>; Eye<sup>02</sup>; Cardiovascular<sup>01, 12</sup>; Musculoskeletal<sup>01, 02, 12</sup>;

Neurological<sup>02</sup>; Skin<sup>01, 03, 07, 12, 13, 14, 21</sup>; Endocrine<sup>03, 12</sup>; Urological<sup>01, 02, 03, 07, 26</sup>; Pregnancy<sup>03</sup>; Female genital<sup>03, 04, 12</sup>;

Male genital<sup>01, 03, 05</sup>; General and Unspecified<sup>01, 07, 12, 15</sup>

Cognates: Zoq: mäm/mom; Tot: kantzilil; Quich: k'ul;

Language contact: Quich <> Nah

### ***Solandra* (Solanaceae)**

Spanish names:

Indigenous names: Tima' wits<sup>07</sup>

Used by (1\*): Huastec<sup>07</sup>

Used for (2#): Eye<sup>07</sup>; General and Unspecified<sup>07</sup>

Cognates:

Language contact:

## ***Solanum* (Solanaceae)**

**Spanish names:** Bejuco de iguana; Berenjena; Cajancli, casancli; Cordillera; Diente de coche, gastabodoc; Gigandilla; Hierba mora; Hierba mora, quelite; Hierba Mora, Quilete, Macuy; Hierba mora, quilete, macuy, quilete de monte; Hierbamora; Hoja de azar/huele de noche; Hoja de balsamo; Jitomate; Lavaplato; Lavaplato blanco; Lavaplato morado/ espina; Lavaplatos blanco; Lavaplatos de espina/ barraco; Macuy, Hierba Amarga, Hierba Mora de Montaña; Merenchena silvestre; Papa; Papera; Pata de cabron; Planta de chuchu; Quelite; Riega platos; San Cayetano; Sosa; Sosa, berenjena; Tabardilla/ tabardillo; Temalabar; Tomate; Tomatillo del Monte; Yerba mora

**Indigenous names:** Mun Tzäbä<sup>01</sup>; Yomo tzutzi<sup>01</sup>; Täptäp kuy awit/tawis tane/awin täptäp kuy/ täm tujkuy/ awit kuy/täptäjkuy awit/ tätsy koya awit/ täktäk kuy awit<sup>01</sup>; Täptäp kuy awit<sup>01</sup>; Koya<sup>01</sup>; Yä kosyoj/pop matsy kuy/ bola kuy<sup>01</sup>; Paga kuy/ poti ay<sup>02</sup>; Mä'a witöm ay / tzäpä<sup>02</sup>; Txipiñ<sup>03</sup>; Poa nanchiñ<sup>03</sup>; Nuup cuy<sup>03</sup>; Muutsei cuy<sup>03</sup>; Tsɣpɣ<sup>03</sup>; Tsɣn hon kiñi<sup>03</sup>; Chi tiuts<sup>03</sup>; Chirion<sup>04</sup>; Kamatøøts<sup>04</sup>; Palcha<sup>05</sup>; Lacaxat, laca šanat<sup>05</sup>; Muu stu'luut<sup>06</sup>; Paklcha<sup>06</sup>; Wal ts'ok, wal piich, wal piita', ich ch'ohool<sup>07</sup>; Tsakam tsabalte', tsakam wheelom, t'othoy ts'ohool, chakam walul<sup>07</sup>; Muuthuuts', pothots, t'akaab plato<sup>07</sup>; Thak'chook' uut', thak'chook' an teneklaab, ehtii i muuthuuts'<sup>07</sup>; Itsik' mitsu', ehtii muuthuuts'<sup>07</sup>; Tuthay<sup>07</sup>; Maayte', eheenchix ts'ohool<sup>07</sup>; Xpahhux, Ukuch kax<sup>09</sup>; Putbalam<sup>09</sup>; P'ak<sup>09</sup>; Xsikli-much<sup>09</sup>; OkutĈ<sup>10</sup>; ĈuĈu<sup>10</sup>; Arepa Ši'iu<sup>10</sup>; Tōom pa'ap<sup>10</sup>; K'e'y aqom ki'k'<sup>12</sup>; Pak'a Q'ix<sup>12</sup>; Xkoya' Q'os<sup>12</sup>; Majk'uy<sup>12</sup>; Saq wach<sup>13</sup>; Imut<sup>13</sup>; Tijol q'ix, uwarc'ak<sup>13</sup>; Paja quix', pajal q'ix', tzajal q'ix'<sup>13</sup>; Xk'a Waka'x<sup>14</sup>; Saq' yool<sup>14</sup>; Rax lk Che<sup>14</sup>; Pajl' Q'ehen, Pajl Q'ix<sup>14</sup>; Macuy<sup>15</sup>; lk, kejen, sajom te<sup>16</sup>; Yäyāx tomate<sup>18</sup>; Majk'ui<sup>19</sup>; K'ux peul, tujkulum ch'ix<sup>20</sup>; Quequelito<sup>21</sup>; Ledxuxii<sup>21</sup>; Guedxe baladu'u<sup>21</sup>; Chacuaquillo<sup>21</sup>; Quitzii<sup>21</sup>; Bityuš bä'kw<sup>22</sup>; Geč bigin<sup>22</sup>; Geč gusohp<sup>22</sup>; Yäg-pchũux-yâas, pxât<sup>23</sup>; Yäg-guièdz-zân<sup>23</sup>; Yahuajcuahuitl<sup>24</sup>; Necaxancuamecatl<sup>24</sup>; Jitomate<sup>25</sup>; Tomatillo<sup>25</sup>; Ixiquelite, chichiquelite<sup>26</sup>; Chichiquelite<sup>26</sup>; Atlapa<sup>26</sup>; Kajanki, kaxajqui<sup>28</sup>

**Used by (25\*):** Zoque<sup>01, 02, 03</sup>; Mixe<sup>04</sup>; Totonac<sup>05, 06</sup>; Huastec<sup>07</sup>; Yucatecan Maya<sup>09, 10, 11</sup>; Quichean Maya<sup>12, 13, 14, 15, 16</sup>; Western Maya<sup>18, 19, 20</sup>; Zapotec<sup>21, 22, 23</sup>; Nahua<sup>24, 25, 26, 28</sup>

**Used for (234#):** Blood<sup>12, 13, 15, 18, 26</sup>; Digestive<sup>01, 02, 03, 06, 07, 12, 13, 14, 18, 20, 21, 22, 23, 26</sup>; Eye<sup>01</sup>; Ear<sup>01, 07, 13</sup>; Cardiovascular<sup>01, 02, 12</sup>; Musculoskeletal<sup>01, 02, 03, 07, 12, 13, 24, 26</sup>; Neurological<sup>01, 03, 04, 06, 07, 12, 13, 16, 18, 22, 25</sup>; Psychological<sup>01, 02, 03, 07, 12, 13, 14, 16, 23, 24</sup>; Respiratory<sup>02, 06, 07, 12, 13, 18, 25</sup>; Skin<sup>01, 02, 03, 04, 05, 06, 07, 09, 10, 12, 13, 14, 19, 21, 22, 23, 25, 26</sup>; Endocrine<sup>01, 02, 03, 06, 12, 24</sup>; Urological<sup>01, 02, 06, 14</sup>; Pregnancy<sup>01, 03, 07, 10, 19, 23, 24, 28</sup>; Female genital<sup>01, 02, 03, 11, 12, 14, 15, 19, 21, 24</sup>; Male genital<sup>01, 03</sup>; General and Unspecified<sup>01, 03, 04, 05, 06, 07, 12, 13, 14, 21, 22, 23, 24, 26</sup>

**Cognates:** MZ: täts, chi; Zoq: mats/muts kuy, tsäpä, täm; Tot: palcha; CoreM: majkuy, pak; Yuc: ukuch / okuch; Quich: makuy / majkuy; paCa q'ix; Zap: pchux / xux; Nah: kaxa;

**Language contact:** Zoq > CoreM; Zoq <> Tot & Hua & Yuc; Zoq > Kaqchikel; Tot <> Hua & Nah; Zoq > Yuc; Zap <> Yuc & Tzeltalan; Tot <> Yuc & Quich

## ***Solidago* (Asteraceae)**

**Spanish names:** Monta bilis, bara de oro

**Indigenous names:**

**Used by (1\*):** Quichean Maya<sup>13</sup>

**Used for (1#):** Digestive<sup>13</sup>

**Cognates:**

**Language contact:**

## ***Sonchus* (Asteraceae)**

**Spanish names:** Amargón, Lechuguilla, Diente de León; Chicorea; Lechiguilla

**Indigenous names:** Met kiej<sup>13</sup>; Chikaryo, kulix pimil, tzepen<sup>20</sup>

**Used by (4\*):** Zoque<sup>01</sup>; Quichean Maya<sup>12, 13</sup>; Western Maya<sup>20</sup>

**Used for (13#):** Blood<sup>12</sup>; Digestive<sup>01, 12, 20</sup>; Musculoskeletal<sup>01</sup>; Neurological<sup>12</sup>; Respiratory<sup>20</sup>; Skin<sup>12, 20</sup>; Urological<sup>01, 13</sup>; Pregnancy<sup>12, 13</sup>

**Cognates:**

**Language contact:**

## ***Sorghum* (Poaceae)**

**Spanish names:**

**Indigenous names:** Laab eem<sup>07</sup>

**Used by (1\*):** Huastec<sup>07</sup>

**Used for (2#):** Digestive<sup>07</sup>; Endocrine<sup>07</sup>

**Cognates:**

**Language contact:**

### ***Souroubea* (Marcgraviaceae)**

Spanish names:

Indigenous names: Hub'ub<sup>17</sup>

Used by (1\*): Quichean Maya<sup>17</sup>

Used for (1#): nd<sup>17</sup>

Cognates:

Language contact:

### ***Spananthe* (Apiaceae)**

Spanish names: Cañuela

Indigenous names:

Used by (1\*): Nahua<sup>26</sup>

Used for (1#): Skin<sup>26</sup>

Cognates:

Language contact:

### ***Spathiphyllum* (Araceae)**

Spanish names:

Indigenous names: Yuk Q'ehen<sup>14</sup>

Used by (2\*): Zoque<sup>03</sup>; Quichean Maya<sup>14</sup>

Used for (3#): Musculoskeletal<sup>14</sup>; Female genital<sup>14</sup>; General and Unspecified<sup>03</sup>

Cognates:

Language contact:

### ***Spermacoce* (Rubiaceae)**

Spanish names: Corte Santito blanco; Crucero; Hierba cresta/tecabezón; Paletaria, sanalotodo, hierba del sapo; Riñonina

Indigenous names: Jutut sotyl<sup>03</sup>; Butun sotyl<sup>03</sup>; Wayel ts'ohool, pakaab ch'ohool<sup>07</sup>; Haway<sup>09</sup>; Haway, Haway-k'ak<sup>09</sup>; Seq'

Q'os ixoq<sup>12</sup>; Tzilij, zlij, tzelej<sup>13</sup>; B'iritaqil Q'ehen, Josq'il Q'ehen<sup>14</sup>; Voton vomol, buluk sit, ve'el buluk sat vomol, k'uxbal

buluk sit wamal, vol nich vomol, ni' chitom<sup>20</sup>

Used by (9\*): Zoque<sup>01, 03</sup>; Huastec<sup>07</sup>; Yucatecan Maya<sup>09</sup>; Quichean Maya<sup>12, 13, 14, 17</sup>; Western Maya<sup>20</sup>

Used for (24#): Digestive<sup>01, 03, 07, 13, 14, 20</sup>; Musculoskeletal<sup>03</sup>; Respiratory<sup>13, 20</sup>; Skin<sup>03, 09, 13, 20</sup>; Urological<sup>03</sup>; Pregnancy<sup>12</sup>; Female

genital<sup>03, 12</sup>; nd<sup>17</sup>

Cognates: Maya: way;

Language contact:

### ***Sphaeralcea* (Malvaceae)**

Spanish names:

Indigenous names: Hierba del negro<sup>25</sup>

Used by (1\*): Nahua<sup>25</sup>

Used for (2#): Musculoskeletal<sup>25</sup>; Skin<sup>25</sup>

Cognates:

Language contact:

### ***Sphagneticola* (Asteraceae)**

Spanish names:

Indigenous names: Samatil Q'ehen<sup>14</sup>

Used by (1\*): Quichean Maya<sup>14</sup>

Used for (2#): Cardiovascular<sup>14</sup>; Psychological<sup>14</sup>

Cognates:

Language contact:

### ***Spigelia* (Loganiaceae)**

Spanish names: Lombricera; Lombrizero

Indigenous names:

Used by (2\*): Zoque<sup>03</sup>; Yucatecan Maya<sup>09</sup>

Used for (2#): Digestive<sup>03, 09</sup>

Cognates:

Language contact:

### ***Spiranthes* (Orchidaceae)**

Spanish names:

Indigenous names: Chiwohk'aak<sup>09</sup>

Used by (1\*): Yucatecan Maya<sup>09</sup>

Used for (1#): Skin<sup>09</sup>

Cognates:

Language contact:

### ***Spondias* (Anacardiaceae)**

Spanish names: Ciruela; Jobo; Jobo, jocote; Jocote; Jocote agrio; Jocote clavo/macho/agrio/acido/cimarrón; Jovo cimarrón

Indigenous names: Katzsu witz<sup>01</sup>; Tuní<sup>02</sup>; Jumu<sup>02</sup>; Pitx cuy<sup>03</sup>; Tun<sup>04</sup>; Skatin<sup>05</sup>; Teen<sup>07</sup>; K'inim<sup>07</sup>; Abal<sup>09</sup>; Kening<sup>10</sup>; Abän<sup>18</sup>; Ajpoc<sup>18</sup>; Paré<sup>19</sup>; Biadxi<sup>21</sup>; Biadxiu'u<sup>21</sup>

Used by (14\*): Zoque<sup>01, 02, 03</sup>; Mixe<sup>04</sup>; Totonac<sup>05</sup>; Huastec<sup>07</sup>; Yucatecan Maya<sup>09, 10, 11</sup>; Quichean Maya<sup>12</sup>; Western Maya<sup>18, 19</sup>; Zapotec<sup>21</sup>; Nahua<sup>26</sup>

Used for (36#): Digestive<sup>02, 03, 04, 05, 07, 12, 18</sup>; Musculoskeletal<sup>12</sup>; Psychological<sup>12</sup>; Respiratory<sup>03, 21, 26</sup>; Skin<sup>01, 02, 03, 07, 11, 12, 18, 21</sup>; Female genital<sup>10, 21</sup>; Male genital<sup>02</sup>; General and Unspecified<sup>02, 03, 07, 09, 12, 18, 19, 21</sup>

Cognates: MZ: tun; Zoq: witz / pitx;

Language contact: MZ > Tot & Hua; Hua <> Yuc; Yuc <> Tabsco Chontal

### ***Sporobolus* (Poaceae)**

Spanish names:

Indigenous names: Zacate<sup>26</sup>

Used by (1\*): Nahua<sup>26</sup>

Used for (1#): Pregnancy<sup>26</sup>

Cognates:

Language contact:

### ***Stachys* (Lamiaceae)**

Spanish names: Hierba de quemadura; Muiña

Indigenous names: Guizh-zhwín<sup>23</sup>; Tlacchinoxihuitl<sup>26</sup>

Used by (2\*): Zapotec<sup>23</sup>; Nahua<sup>26</sup>

Used for (2#): Psychological<sup>23</sup>; Skin<sup>26</sup>

Cognates:

Language contact: Zap <> Nah

### ***Stachytarpheta* (Verbenaceae)**

Spanish names: Cola de alacrán/verbena embra; Cola de Armadillo, Armado; Verbena; Vervena

Indigenous names: Kaku'e tuts<sup>01</sup>; Chi tiuts<sup>03</sup>; Pacer ujts<sup>04</sup>; Iben-xiw<sup>09</sup>; Xye' ajwech<sup>14</sup>; Xtye aj pak<sup>16</sup>; Tye aj pak<sup>17</sup>

Used by (10\*): Zoque<sup>01, 03</sup>; Mixe<sup>04</sup>; Yucatecan Maya<sup>09, 11</sup>; Quichean Maya<sup>14, 16, 17</sup>; Western Maya<sup>18</sup>; Zapotec<sup>21</sup>

Used for (28#): Digestive<sup>01, 04, 14, 18, 21</sup>; Eye<sup>14</sup>; Cardiovascular<sup>01</sup>; Musculoskeletal<sup>09</sup>; Neurological<sup>01, 03, 11, 16, 18</sup>; Skin<sup>01, 03, 14</sup>; Urological<sup>03, 11, 14</sup>; Female genital<sup>03, 09, 14</sup>; Male genital<sup>18</sup>; General and Unspecified<sup>11, 14, 18, 21</sup>; nd<sup>17</sup>

Cognates: Quich: ye aj ;

Language contact:

### ***Stegnosperma* (Stegnospermataceae)**

Spanish names: Niño que no se puede levantar

Indigenous names:

Used by (1\*): Zapotec<sup>21</sup>

Used for (2#): Musculoskeletal<sup>21</sup>; Neurological<sup>21</sup>

Cognates:

Language contact:

### ***Stellaria* (Caryophyllaceae)**

Spanish names: Cadillo ovalado; Hierba de rosillo; Hoja de azar; Trebolillo rojo

Indigenous names: Tza'a tzoy<sup>01</sup>; Thuuyuu'il t'eel, ehtiiil utek<sup>07</sup>; Keq Lotz Aq'om<sup>12</sup>; Ahuaxmama<sup>26</sup>

Used by (5\*): Zoque<sup>01, 03</sup>; Huastec<sup>07</sup>; Quichean Maya<sup>12</sup>; Nahua<sup>26</sup>

Used for (12#): Eye<sup>12</sup>; Cardiovascular<sup>07, 12</sup>; Musculoskeletal<sup>12</sup>; Neurological<sup>12</sup>; Psychological<sup>12</sup>; Skin<sup>12</sup>; Urological<sup>03</sup>; Female genital<sup>03</sup>; General and Unspecified<sup>01, 12, 26</sup>

Cognates:

Language contact:

### ***Stemodia* (Plantaginaceae)**

Spanish names:

Indigenous names: Tlaquexaniltzi<sup>26</sup>

Used by (1\*): Nahua<sup>26</sup>

Used for (1#): Skin<sup>26</sup>

Cognates:

Language contact:

### ***Stenocereus* (Cactaceae)**

Spanish names: Cactus

Indigenous names: Tzap kom<sup>01</sup>

Used by (1\*): Zoque<sup>01</sup>

Used for (1#): Skin<sup>01</sup>

Cognates:

Language contact:

### ***Stevia* (Asteraceae)**

Spanish names: Cabeza de hongo; Hierba blanca de muerto; Ocaotera; Pericón blanco; Yerba de borracho

Indigenous names: Winyo wajo' jop ay<sup>02</sup>; Sak'a eya<sup>12</sup>; Ujlom ikox<sup>13</sup>; Ch'aj te' nichim, ch'aal sakil nich wamal, ch'aal wamal, ch'a momol, nak' obal us<sup>20</sup>; Tzajal nak'obal us<sup>20</sup>; Gi lahk<sup>22</sup>

Used by (6\*): Zoque<sup>01, 02</sup>; Quichean Maya<sup>12, 13</sup>; Western Maya<sup>20</sup>; Zapotec<sup>22</sup>

Used for (16#): Blood<sup>12</sup>; Digestive<sup>12, 13, 20, 22</sup>; Musculoskeletal<sup>20</sup>; Neurological<sup>12</sup>; Skin<sup>01, 02, 12, 20</sup>; Endocrine<sup>12</sup>; General and Unspecified<sup>12</sup>

Cognates:

Language contact:

### ***Stigmaphyllon* (Malpighiaceae)**

Spanish names:

Indigenous names: Samñi tsay<sup>03</sup>

Used by (1\*): Zoque<sup>03</sup>

Used for (3#): Digestive<sup>03</sup>; Female genital<sup>03</sup>

Cognates:

Language contact:



### ***Stillingia* (Euphorbiaceae)**

Spanish names: Hierba mala

Indigenous names: Puj Q'ayis<sup>12</sup>; Etzel k'ayes<sup>13</sup>

Used by (2\*): Quichean Maya<sup>12, 13</sup>

Used for (3#): Skin<sup>12, 13</sup>; General and Unspecified<sup>12</sup>

Cognates: Quich: k'ayis;

Language contact:

### ***Stizophyllum* (Bignoniaceae)**

Spanish names:

Indigenous names: Xa'bach<sup>09</sup>

Used by (1\*): Yucatecan Maya<sup>09</sup>

Used for (1#): Respiratory<sup>09</sup>

Cognates:

Language contact:

### ***Stromanthe* (Marantaceae)**

Spanish names: Hoja de piedra

Indigenous names: Tza ay<sup>01</sup>; Xmox So'sol<sup>14</sup>

Used by (2\*): Zoque<sup>01</sup>; Quichean Maya<sup>14</sup>

Used for (3#): Digestive<sup>01</sup>; Urological<sup>01</sup>; Female genital<sup>14</sup>

Cognates:

Language contact:

### ***Struthanthus* (Loranthaceae)**

Spanish names: Caballera; Cabellera; Mata palo; Muérdago; Seca palo

Indigenous names: Eju katzakatza<sup>01</sup>; Cuyñukxi<sup>03</sup>; Ok'lom te<sup>07</sup>; Mak'tahila<sup>08</sup>; Tzara' Aq'om<sup>12</sup>; Tzara' <sup>12</sup>; Raximai Q'en, Mayil Q'en<sup>14</sup>; Tak'ä zte<sup>18</sup>

Used by (7\*): Zoque<sup>01, 03</sup>; Huastec<sup>07, 08</sup>; Quichean Maya<sup>12, 14</sup>; Western Maya<sup>18</sup>

Used for (26#): Blood<sup>12</sup>; Digestive<sup>01, 07, 12</sup>; Cardiovascular<sup>07, 12</sup>; Musculoskeletal<sup>12</sup>; Neurological<sup>07, 12</sup>; Psychological<sup>07, 12</sup>; Skin<sup>03, 08, 12, 14, 18</sup>; Endocrine<sup>08</sup>; Pregnancy<sup>18</sup>; Female genital<sup>01</sup>; General and Unspecified<sup>12, 14</sup>

Cognates:

Language contact:

### ***Strychnos* (Loganiaceae)**

Spanish names: Chicoloro

Indigenous names: Curux k'ix<sup>17</sup>

Used by (2\*): Yucatecan Maya<sup>10</sup>; Quichean Maya<sup>17</sup>

Used for (3#): Digestive<sup>10</sup>; Skin<sup>10</sup>; nd<sup>17</sup>

Cognates:

Language contact:

### ***Stylosanthes* (Fabaceae)**

Spanish names: Hoja de azar

Indigenous names: Tza'a tzo<sup>01</sup>

Used by (2\*): Zoque<sup>01, 03</sup>

Used for (2#): Skin<sup>03</sup>; General and Unspecified<sup>01</sup>

Cognates:

Language contact:

### ***Stylotrichium* (Asteraceae)**

Spanish names: Hierba de dulce, sacate dulce

Indigenous names: Loc'ab<sup>13</sup>

Used by (1\*): Quichean Maya<sup>13</sup>

Used for (1#): Skin<sup>13</sup>

Cognates:

Language contact:

### ***Swietenia* (Meliaceae)**

Spanish names: Caoba

Indigenous names: Tzapats kuy<sup>02</sup>; Gueleyexi'<sup>21</sup>

Used by (4\*): Zoque<sup>01, 02, 03</sup>; Zapotec<sup>21</sup>

Used for (11#): Digestive<sup>03, 21</sup>; Musculoskeletal<sup>03</sup>; Skin<sup>21</sup>; Endocrine<sup>01, 02</sup>; Urological<sup>01</sup>; Pregnancy<sup>21</sup>; Female genital<sup>03</sup>; General and Unspecified<sup>01, 21</sup>

Cognates:

Language contact:

### ***Symphyotrichum* (Asteraceae)**

Spanish names: Pericon de agua; Tomillo silvestre

Indigenous names:

Used by (2\*): Zoque<sup>01, 03</sup>

Used for (2#): General and Unspecified<sup>01, 03</sup>

Cognates:

Language contact:

### ***Syngonium* (Araceae)**

Spanish names: Mano de Diablo ; Palma de Diablo; Pegapega; Platano del monte; Teleconte

Indigenous names: Mu' katzu/ Mä'k katzu<sup>02</sup>; Pa-uk tiinxy<sup>04</sup>; Kwaath<sup>07</sup>; Ruq' Maus aj' Winq<sup>14</sup>; Ruj i ruk'aj tza, ruk maus<sup>16</sup>; Buduaj gueexii<sup>21</sup>

Used by (7\*): Zoque<sup>02</sup>; Mixe<sup>04</sup>; Huastec<sup>07</sup>; Yucatecan Maya<sup>11</sup>; Quichean Maya<sup>14, 16</sup>; Zapotec<sup>21</sup>

Used for (12#): Digestive<sup>02, 07</sup>; Musculoskeletal<sup>11</sup>; Neurological<sup>14, 16</sup>; Psychological<sup>16</sup>; Skin<sup>02, 04, 14</sup>; General and Unspecified<sup>14, 21</sup>

Cognates: Quich: ruk maus;

Language contact:

### ***Syzygium* (Myrtaceae)**

Spanish names: Clavo; Clavo de olor; Clavo de olor/ clavo de comida; Pomarosa

Indigenous names: Cuonagueleraajeu'u<sup>21</sup>

Used by (8\*): Zoque<sup>01, 02, 03</sup>; Totonac<sup>06</sup>; Quichean Maya<sup>13</sup>; Zapotec<sup>21, 22, 23</sup>

Used for (13#): Digestive<sup>01, 06</sup>; Ear<sup>01</sup>; Musculoskeletal<sup>21</sup>; Neurological<sup>02</sup>; Psychological<sup>03</sup>; Respiratory<sup>01, 03, 21</sup>; Skin<sup>23</sup>; Pregnancy<sup>13</sup>; General and Unspecified<sup>21, 22</sup>

Cognates:

Language contact:

### ***Tabebuia* (Bignoniaceae)**

Spanish names: Macuiliz, macuiliz amarillo; Makulis / Matiliguat ; Maquilishuat/maquilisguate; Roble

Indigenous names: Tzan kuy<sup>01</sup>; Emkuioxk<sup>04</sup>; K'uul, wakats wich<sup>07</sup>; Makulis<sup>14</sup>; Känkän aj maculis<sup>18</sup>

Used by (7\*): Zoque<sup>01, 02, 03</sup>; Mixe<sup>04</sup>; Huastec<sup>07</sup>; Quichean Maya<sup>14</sup>; Western Maya<sup>18</sup>

Used for (21#): Digestive<sup>02, 07, 14, 18</sup>; Musculoskeletal<sup>01, 03</sup>; Neurological<sup>18</sup>; Skin<sup>01, 02, 03, 04, 07, 18</sup>; Endocrine<sup>18</sup>; Pregnancy<sup>03</sup>; Female genital<sup>03, 07, 14</sup>; General and Unspecified<sup>07, 14, 18</sup>

Cognates: CoreM: makulis;

Language contact:

## ***Tabernaemontana* (Apocynaceae)**

Spanish names: Coyol de burro; Huevo caballo; Huevo de venado

Indigenous names: Burro puj<sup>02</sup>; Na'a cuy<sup>03</sup>; No'og waaky<sup>04</sup>; T'abat<sup>07</sup>; Uts'upek<sup>09</sup>; Chac le king<sup>10</sup>; Mbiigu' del monte<sup>21</sup>

Used by (7\*): Zoque<sup>02, 03</sup>; Mixe<sup>04</sup>; Huastec<sup>07</sup>; Yucatecan Maya<sup>09, 10</sup>; Zapotec<sup>21</sup>

Used for (11#): Digestive<sup>03</sup>; Neurological<sup>03, 04, 07</sup>; Respiratory<sup>21</sup>; Skin<sup>02, 03, 07, 09, 10, 21</sup>

Cognates: MZ: na'a/no'o;

Language contact:

## ***Tagetes* (Asteraceae)**

Spanish names: Anicillo, anís de monte; Anís; Anís de chucho/ monte / del campo; Anís de estrella, Melicón; Anís del camo; Anís del monte; Anisillo; Anisillo/anís/anís de estrella; Cempasúchil; Cempasuchil, flor de muerto; Cempasúchitl; Cempazúchitl; Cempoalxóchtitl; Flor de anís; Flor de Muerte; Flor de Muerto; Flor de muerto, tixcoque; Flor de perico; Flor del alma, flor de muerto, tsampoala, cempasúchil, flor de difunto/ sempoala; Hierba anís; Pericón; Pericón amarillo; Pericón, hierba de anís, hierba de San Juan, hierba de Santa Maria; Sempolsuchet, togoles; Todos santos; Xempasochil; Zampozuche

Indigenous names: Postin jäyā/putsy jäyā/putzin jäyā<sup>01</sup>; Estrella pok<sup>01</sup>; Tzitzimuk<sup>01</sup>; Anima jäyā<sup>01</sup>; Tasi jäyā<sup>02</sup>; Kotzok ay<sup>02</sup>; Tsuts mooya<sup>03</sup>; Pikøn'ak pøh<sup>04</sup>; Anís ujts<sup>04</sup>; Kaltpu'xa'm<sup>05</sup>; Santoorom wits, k'uchuth wits, k'ochith wits, kaxiy wits, ts'a'il wits, pamta wich<sup>07</sup>; Ohoom<sup>07</sup>; K'uchid huitz<sup>08</sup>; Tempula<sup>09</sup>; Stupuh amarillo<sup>10</sup>; Ix tupuj<sup>11</sup>; Eva' / Eya'<sup>12</sup>; Anix tzi'<sup>13</sup>; Illa', iya'<sup>13</sup>; Prutz', pretz', ukutz'ij kaminaq<sup>13</sup>; Tu'z, Tutz, Tutz' Tatz'un Kamenaq<sup>14</sup>; Yop'aj melicon<sup>18</sup>; Tiskok<sup>18</sup>; Sampwer<sup>19</sup>; Mantzaniya ch'o, kulentu jos, inajo antiwo, injo wamal, tzitz, tzitz olol<sup>20</sup>; Tzitz wamal, tzitz uch, sansiwre wamal, k'anal nich wamal, pimento wamal<sup>20</sup>; Yama chauk<sup>20</sup>; Guibigua<sup>21</sup>; Guiahuajsa'ac<sup>21</sup>; Gi bigu štil, gi togol<sup>22</sup>; Anís gihš<sup>22</sup>; Guièe-cöb-mzhīg, guièe-cöb-yâg<sup>23</sup>; Guizh-nìzh, guièe-nìzh<sup>23</sup>; Guièe-dzùu, guièe-cöb-dzùu<sup>23</sup>; Sempoalxochitl<sup>24</sup>; Cempasúchitl<sup>25</sup>; Cempoalxochitl<sup>26</sup>; Cempoalxóchitl<sup>28</sup>; Yauhtli<sup>28</sup>

Used by (24\*): Zoque<sup>01, 02, 03</sup>; Mixe<sup>04</sup>; Totonac<sup>05, 06</sup>; Huastec<sup>07, 08</sup>; Yucatecan Maya<sup>09, 10, 11</sup>; Quichean Maya<sup>12, 13, 14</sup>; Western Maya<sup>18, 19, 20</sup>; Zapotec<sup>21, 22, 23</sup>; Nahua<sup>24, 25, 26, 28</sup>

Used for (160#): Blood<sup>12</sup>; Digestive<sup>01, 02, 03, 04, 05, 06, 07, 08, 11, 12, 13, 14, 18, 19, 20, 21, 22, 23, 25, 26, 28</sup>; Eye<sup>19</sup>; Ear<sup>01, 19, 23</sup>; Cardiovascular<sup>01, 08</sup>; Musculoskeletal<sup>02, 03, 07, 08, 11, 12, 18, 20, 26</sup>; Neurological<sup>07, 12, 14, 18, 28</sup>; Psychological<sup>01, 03, 05, 12, 13, 19, 20</sup>; Respiratory<sup>01, 03, 07, 08, 12, 13, 14, 18, 20, 21, 23, 25, 28</sup>; Skin<sup>01, 03, 05, 07, 08, 12, 18, 21, 25, 28</sup>; Endocrine<sup>07</sup>; Urological<sup>01, 12, 13</sup>; Pregnancy<sup>02, 03, 07, 13, 19, 21, 22, 23, 24, 26</sup>; Female genital<sup>01, 02, 03, 05, 09, 12, 13, 19, 21</sup>; General and Unspecified<sup>01, 02, 03, 04, 05, 07, 08, 10, 12, 13, 14, 18, 19, 20, 21, 28</sup>

Cognates: Zoq: Cuts mooya/jäyā; Hua: k'ochith wits; Yuc: tupu; Quich: eya/iya, utz; Zap: gibigu; Nah: cempoalxochitl;

Language contact: Zoq <> Tot & Hua & Yuc & Quich; WesM > Chiapas Zoq (tzitz)

## ***Talinum* (Talinaceae)**

Spanish names: Hierba del riñon

Indigenous names: Masan ay<sup>03</sup>; Thak akw'aal, t'uhub akw'aal<sup>07</sup>; Pitsits wal pktha', tsakam ix thuyum<sup>07</sup>; Ncuàan-dzéb-ròò<sup>23</sup>

Used by (4\*): Zoque<sup>01, 03</sup>; Huastec<sup>07</sup>; Zapotec<sup>23</sup>

Used for (10#): Digestive<sup>03, 07</sup>; Musculoskeletal<sup>03</sup>; Skin<sup>03, 07</sup>; Urological<sup>01, 07</sup>; Female genital<sup>01</sup>; General and Unspecified<sup>07, 23</sup>

Cognates:

Language contact:

## ***Tamarindus* (Fabaceae)**

Spanish names: Tamarindo

Indigenous names: Tamariindu, tam malin<sup>07</sup>; Gubshnii<sup>21</sup>

Used by (10\*): Zoque<sup>02, 03</sup>; Mixe<sup>04</sup>; Huastec<sup>07</sup>; Yucatecan Maya<sup>09</sup>; Quichean Maya<sup>12</sup>; Western Maya<sup>18, 19</sup>; Zapotec<sup>21, 23</sup>

Used for (26#): Digestive<sup>02, 03, 09, 12, 18, 23</sup>; Musculoskeletal<sup>02</sup>; Neurological<sup>02</sup>; Psychological<sup>07, 21</sup>; Respiratory<sup>02, 03</sup>; Skin<sup>02, 18</sup>; Endocrine<sup>02, 12</sup>; Urological<sup>03, 18</sup>; General and Unspecified<sup>02, 03, 04, 07, 12, 18, 19, 21</sup>

Cognates:

Language contact:

## ***Tamonea* (Verbenaceae)**

Spanish names:

Indigenous names: Ook' t'ithith<sup>07</sup>

Used by (1\*): Huastec<sup>07</sup>

Used for (2#): Digestive<sup>07</sup>; Urological<sup>07</sup>

Cognates:

Language contact:

### ***Tanacetum* (Asteraceae)**

Spanish names: Altamisa; Altamisa, artemisa, margarita; Flor de Santa Maria; Hierba de Santa Maria; Hierba santa maria; Hierbasanta; Manzanilla amarga, Santa María; Santa María; Santa Maria, manzanilla amarga; Santamaría

Indigenous names: Artamiza/artamisy/altamiza<sup>01</sup>; Santa Maria aay<sup>04</sup>; K'anim mim María ts'ojol<sup>08</sup>; Altamix<sup>12</sup>; Altamix, altimix, altamixá<sup>13</sup>; Guixnash<sup>21</sup>; Manzaniy la<sup>22</sup>; Guièe-sàntàmàrì, guièe-sàntàmàrì-nquĩts<sup>23</sup>; Caltemesha<sup>28</sup>

Used by (13\*): Zoque<sup>01, 02</sup>; Mixe<sup>04</sup>; Huastec<sup>08</sup>; Quichean Maya<sup>12, 13</sup>; Zapotec<sup>21, 22, 23</sup>; Nahua<sup>25, 26, 27, 28</sup>

Used for (53#): Blood<sup>12</sup>; Digestive<sup>01, 02, 04, 08, 12, 13, 21, 22, 23, 25, 26, 27</sup>; Ear<sup>04, 23</sup>; Cardiovascular<sup>23</sup>; Musculoskeletal<sup>01, 12, 13, 23</sup>;

Neurological<sup>08, 12, 13</sup>; Psychological<sup>13, 22, 27</sup>; Respiratory<sup>12, 23</sup>; Skin<sup>12</sup>; Urological<sup>02, 12, 13</sup>; Pregnancy<sup>01, 02, 12, 13, 21, 23, 25, 27</sup>; Female genital<sup>01, 02, 04, 12, 13, 23</sup>; General and Unspecified<sup>01, 08, 12, 13, 22, 25, 28</sup>

Cognates:

Language contact:

### ***Tanaecium* (Bignoniaceae)**

Spanish names:

Indigenous names: Pobatsay<sup>03</sup>; Bak chiwoh<sup>09</sup>; Ški'iš<sup>10</sup>

Used by (3\*): Zoque<sup>03</sup>; Yucatecan Maya<sup>09, 10</sup>

Used for (4#): Respiratory<sup>09</sup>; Skin<sup>03, 10</sup>; Female genital<sup>03</sup>

Cognates:

Language contact:

### ***Tapirira* (Anacardiaceae)**

Spanish names: Ocholillo

Indigenous names: Ocholi nuumpi<sup>03</sup>

Used by (1\*): Zoque<sup>03</sup>

Used for (2#): Musculoskeletal<sup>03</sup>; Psychological<sup>03</sup>

Cognates:

Language contact:

### ***Taraxacum* (Asteraceae)**

Spanish names: Amargón, Lechuguilla, Diente de León, Lechuga criollo; Diente de león; Diente de león, amargón, scorzonera amarga; Diente de león, lechogilla

Indigenous names: Q'uqun Q'än Q'os<sup>12</sup>; Kur kur<sup>13</sup>

Used by (5\*): Zoque<sup>01</sup>; Quichean Maya<sup>12, 13</sup>; Nahua<sup>25, 26</sup>

Used for (17#): Blood<sup>13</sup>; Digestive<sup>01, 12, 13</sup>; Cardiovascular<sup>25</sup>; Psychological<sup>12</sup>; Respiratory<sup>13, 25</sup>; Endocrine<sup>12, 26</sup>; Urological<sup>01, 12, 13, 25, 26</sup>; Pregnancy<sup>13</sup>; General and Unspecified<sup>12</sup>

Cognates:

Language contact:

### ***Taxodium* (Cupressaceae)**

Spanish names: Sabino, ahuehuete

Indigenous names: Chuuche<sup>07</sup>; Yàg-guizdòo, yàg-guistòo<sup>23</sup>

Used by (2\*): Huastec<sup>07</sup>; Zapotec<sup>23</sup>

Used for (3#): Skin<sup>23</sup>; Pregnancy<sup>07</sup>; Female genital<sup>07</sup>

Cognates:

Language contact:

### ***Tecoma* (Bignoniaceae)**

Spanish names: Argel; Flor amarilla, chinche; Hoja de San Pedro, tronadora; Timboque; Trobadora, yerba de empacho; Tronadora; Tronadora, flor de arco

Indigenous names: Kan yok<sup>01</sup>; Totzkä jäy<sup>02</sup>; Puutx mooya<sup>03</sup>; San pedro wits<sup>07</sup>; K'anlol<sup>09</sup>; Timbuk<sup>13</sup>; Ch'aj te<sup>19</sup>; Dze'ing<sup>21</sup>; Guièe-tùts, guìzh-tùts, guìzh-guìèe-tùts, yàg-guìèe-tùts, yàg-nlibâd-tùts<sup>23</sup>; Nixtamalxochitl<sup>28</sup>

Used by (14\*): Zoque<sup>01, 02, 03</sup>; Mixe<sup>04</sup>; Huastec<sup>07</sup>; Yucatecan Maya<sup>09</sup>; Quichean Maya<sup>12, 13</sup>; Western Maya<sup>18, 19</sup>; Zapotec<sup>21, 22, 23</sup>; Nahua<sup>28</sup>

Used for (36#): Digestive<sup>02, 03, 21, 22, 28</sup>; Cardiovascular<sup>12</sup>; Musculoskeletal<sup>01, 02, 19, 21</sup>; Neurological<sup>12, 19</sup>; Respiratory<sup>02, 03, 19, 23</sup>; Skin<sup>01, 19</sup>; Endocrine<sup>01, 02, 03, 04, 07, 09, 12, 13, 18, 28</sup>; Urological<sup>01</sup>; Pregnancy<sup>04</sup>; Female genital<sup>21</sup>; General and Unspecified<sup>01, 03, 04, 19, 21</sup>

Cognates:

Language contact: Chimalapa Zoq <> Zap; Yuc > Chiapas Zoq

### ***Tectaria* (Tectariaceae)**

Spanish names: Hierba del monte; Lengua de ciervo; Pesmita; Pijul; Siempreviva

Indigenous names: Weew koxol, akan hooh, k'ubak k'aninmiin, akan tspk, pok' ts'ohool, pux lat'em, lek'aab torro<sup>07</sup>; Kubak ajatik<sup>08</sup>; Roq' Chi'wan<sup>14</sup>; Matlaxcalxihuitl<sup>24</sup>

Used by (7\*): Zoque<sup>03</sup>; Totonac<sup>05</sup>; Huastec<sup>07, 08</sup>; Quichean Maya<sup>14</sup>; Nahua<sup>24, 25</sup>

Used for (13#): Blood<sup>07</sup>; Digestive<sup>07</sup>; Cardiovascular<sup>07</sup>; Neurological<sup>07, 14</sup>; Psychological<sup>03</sup>; Skin<sup>05, 08</sup>; Endocrine<sup>08</sup>; Pregnancy<sup>07, 24</sup>; General and Unspecified<sup>07, 25</sup>

Cognates: Hua: kubak;

Language contact:

### ***Telanthophora* (Asteraceae)**

Spanish names: Mano de León

Indigenous names: Nag ay<sup>03</sup>

Used by (2\*): Zoque<sup>03</sup>; Quichean Maya<sup>12</sup>

Used for (5#): Psychological<sup>12</sup>; Skin<sup>03</sup>; Urological<sup>12</sup>; Pregnancy<sup>03</sup>; General and Unspecified<sup>12</sup>

Cognates:

Language contact:

### ***Tephrosia* (Fabaceae)**

Spanish names:

Indigenous names: Mokoy<sup>03</sup>; Ch'alam<sup>17</sup>

Used by (2\*): Zoque<sup>03</sup>; Quichean Maya<sup>17</sup>

Used for (3#): Skin<sup>03</sup>; nd<sup>17</sup>

Cognates:

Language contact:

### ***Terminalia* (Combretaceae)**

Spanish names: Almendra; Almendro

Indigenous names: Bek almendra<sup>18</sup>

Used by (7\*): Zoque<sup>01, 02, 03</sup>; Yucatecan Maya<sup>09</sup>; Western Maya<sup>18, 19</sup>; Zapotec<sup>21</sup>

Used for (21#): Digestive<sup>01, 02, 03, 09, 18, 21</sup>; Neurological<sup>18</sup>; Respiratory<sup>01, 19</sup>; Skin<sup>01, 02, 18</sup>; Endocrine<sup>01, 02, 03</sup>; Urological<sup>01, 09</sup>; Pregnancy<sup>03</sup>; Female genital<sup>03</sup>; General and Unspecified<sup>01, 21</sup>

Cognates:

Language contact:

### ***Ternstroemia* (Pentaphylacaceae)**

Spanish names: Flor de tila; Té de tila; Trompito/flor de tila

Indigenous names: Mʼña nanchiñ<sup>03</sup>

Used by (4\*): Zoque<sup>01, 02, 03</sup>; Zapotec<sup>21</sup>

Used for (14#): Digestive<sup>01, 03, 21</sup>; Cardiovascular<sup>01, 03, 21</sup>; Psychological<sup>01, 02, 03, 21</sup>; Pregnancy<sup>03</sup>; General and Unspecified<sup>01</sup>

Cognates:

Language contact:

### ***Tetrachyron* (Asteraceae)**

Spanish names: Flor de enjambre

Indigenous names: Cerreroxochitl<sup>26</sup>

Used by (1\*): Nahuatl<sup>26</sup>

Used for (1#): Musculoskeletal<sup>26</sup>

Cognates:

Language contact:

### ***Tetramerium* (Acanthaceae)**

Spanish names: Hoja de vergüenza

Indigenous names: Jꞑxi ay<sup>03</sup>

Used by (1\*): Zoque<sup>03</sup>

Used for (1#): Psychological<sup>03</sup>

Cognates:

Language contact:

### ***Teucrium* (Lamiaceae)**

Spanish names:

Indigenous names: Tihtsan kw'et, weew ethem, t'othoy ts'ohool, thak pux, thak ch'a'ik ch'ohool<sup>07</sup>

Used by (1\*): Huastec<sup>07</sup>

Used for (4#): Blood<sup>07</sup>; Cardiovascular<sup>07</sup>; Skin<sup>07</sup>; General and Unspecified<sup>07</sup>

Cognates:

Language contact:

### ***Thalictrum* (Ranunculaceae)**

Spanish names: Flor de San Antonio; Hoja de azar

Indigenous names: Guizh-mèt, guizh-crùz-nguäts, guizh-túb, guièer-ngüèts, ncuàan-dzéb-ròò<sup>23</sup>

Used by (3\*): Zoque<sup>01</sup>; Quichean Maya<sup>13</sup>; Zapotec<sup>23</sup>

Used for (4#): Neurological<sup>13</sup>; General and Unspecified<sup>01, 13, 23</sup>

Cognates:

Language contact:

### ***Thelypteris* (Thelypteridaceae)**

Spanish names: Colandrillo; Helecho

Indigenous names:

Used by (3\*): Western Maya<sup>18</sup>; Zapotec<sup>21</sup>; Nahuatl<sup>24</sup>

Used for (3#): Respiratory<sup>18</sup>; Urological<sup>21</sup>; Pregnancy<sup>24</sup>

Cognates:

Language contact:

### ***Theobroma* (Malvaceae)**

Spanish names: Cacao

Indigenous names: Kakawa<sup>01</sup>; Kakawa<sup>02</sup>; Caco<sup>13</sup>; Cacao, X'aq Cacao<sup>14</sup>; Cäcäw<sup>18</sup>; Yäg-bzèy<sup>23</sup>

Used by (9\*): Zoque<sup>01, 02</sup>; Quichean Maya<sup>12, 13, 14</sup>; Western Maya<sup>18</sup>; Zapotec<sup>21, 22, 23</sup>

Used for (13#): Blood<sup>12</sup>; Digestive<sup>01, 18</sup>; Skin<sup>18</sup>; Endocrine<sup>12</sup>; Pregnancy<sup>01, 02, 13, 23</sup>; General and Unspecified<sup>12, 14, 21, 22</sup>

Cognates: Zoq: kakawa; CoreM: kakV;

Language contact: Zoq > Mesoamerican

### ***Thevetia* (Apocynaceae)**

Spanish names: Corcocho; Coyol de burro/coyol de gato; Huevo de gato

Indigenous names: Yoyak puj<sup>01</sup>; Puti kuy, burro puj, jatiks kumku<sup>02</sup>; Cha'lawaka, M̃aaktsa<sup>03</sup>; Atsømtu'ty<sup>04</sup>; Ch'ich'iyan, Naq'irit i' mis<sup>14</sup>; Ch'ich i jak<sup>17</sup>; Yoyotle<sup>26</sup>

Used by (7\*): Zoque<sup>01, 02, 03</sup>; Mixe<sup>04</sup>; Quichean Maya<sup>14, 17</sup>; Nahua<sup>26</sup>

Used for (12#): Digestive<sup>14</sup>; Musculoskeletal<sup>03</sup>; Neurological<sup>04</sup>; Skin<sup>01, 02, 03, 14</sup>; Pregnancy<sup>03</sup>; Female genital<sup>03</sup>; General and Unspecified<sup>14, 26</sup>; nd<sup>17</sup>

Cognates: Zoq: puj; Quich: chichi yan/jak;

Language contact: Nah > Chiapas Zoq

### ***Thunbergia* (Acanthaceae)**

Spanish names: Hierba del espanto; Tumbergia

Indigenous names: Makti mooya<sup>03</sup>; Yommooya<sup>03</sup>; Paxtama'tahua, pastak'natahuan<sup>05</sup>; Tsaayleel ts'ohool<sup>07</sup>; Ik' ts'ohool<sup>07</sup>; Rukama'l B'ochil Kotzij<sup>12</sup>

Used by (4\*): Zoque<sup>03</sup>; Totonac<sup>05</sup>; Huastec<sup>07</sup>; Quichean Maya<sup>12</sup>

Used for (13#): Digestive<sup>03</sup>; Ear<sup>03</sup>; Cardiovascular<sup>12</sup>; Musculoskeletal<sup>12</sup>; Neurological<sup>07</sup>; Psychological<sup>12</sup>; Skin<sup>03, 12</sup>; General and Unspecified<sup>03, 05, 12</sup>

Cognates:

Language contact: Highland Popoluca <> Tot

### ***Thymus* (Lamiaceae)**

Spanish names: Tomillo; Toronjil

Indigenous names:

Used by (5\*): Zoque<sup>01</sup>; Totonac<sup>06</sup>; Quichean Maya<sup>12, 13</sup>; Western Maya<sup>19</sup>

Used for (15#): Digestive<sup>06, 12</sup>; Musculoskeletal<sup>12</sup>; Neurological<sup>12</sup>; Psychological<sup>12</sup>; Respiratory<sup>01, 12, 13, 19</sup>; Urological<sup>12</sup>; Pregnancy<sup>12</sup>; Female genital<sup>12</sup>; General and Unspecified<sup>01, 12</sup>

Cognates:

Language contact:

### ***Tibouchina* (Melastomataceae)**

Spanish names: Tesuatillo

Indigenous names: Cacaloxihuitle<sup>26</sup>

Used by (2\*): Zoque<sup>03</sup>; Nahua<sup>26</sup>

Used for (4#): Digestive<sup>26</sup>; Eye<sup>03</sup>; Respiratory<sup>26</sup>; Skin<sup>03</sup>

Cognates:

Language contact:

### ***Tilia* (Malvaceae)**

Spanish names: Flor de tila; Tila; Tilo

Indigenous names: Guièe-tîl<sup>23</sup>

Used by (4\*): Huastec<sup>08</sup>; Quichean Maya<sup>12</sup>; Zapotec<sup>23</sup>; Nahua<sup>25</sup>

Used for (17#): Blood<sup>12</sup>; Digestive<sup>12, 23, 25</sup>; Eye<sup>08</sup>; Cardiovascular<sup>08, 12, 25</sup>; Musculoskeletal<sup>12</sup>; Neurological<sup>12</sup>; Psychological<sup>08, 12, 25</sup>; Urological<sup>12</sup>; Female genital<sup>12</sup>; General and Unspecified<sup>12</sup>

Cognates:

Language contact:

### ***Tillandsia* (Bromeliaceae)**

Spanish names: Paxte, pashtio; Pie de Gallo

Indigenous names: Tsakam k'ok'om<sup>07</sup>; K'uthay<sup>07</sup>; Ch'u<sup>09</sup>; Q'ux<sup>13</sup>; Roq Aj Tzo<sup>14</sup>; Cuamimisi<sup>24</sup>

Used by (5\*): Huastec<sup>07</sup>; Yucatecan Maya<sup>09</sup>; Quichean Maya<sup>13, 14</sup>; Nahua<sup>24</sup>

Used for (15#): Musculoskeletal<sup>13</sup>; Neurological<sup>07</sup>; Respiratory<sup>07</sup>; Skin<sup>07, 14</sup>; Pregnancy<sup>07, 09</sup>; Female genital<sup>09, 24</sup>; General and Unspecified<sup>07, 13</sup>

Cognates: Maya: k'u/ch'u;

Language contact:

### ***Tinantia* (Commelinaceae)**

Spanish names: Pata de pollo, pata de gallo; Siempre viva blanca

Indigenous names: Tzui<sup>01</sup>; Quix'tac<sup>06</sup>

Used by (2\*): Zoque<sup>01</sup>; Totonac<sup>06</sup>

Used for (7#): Digestive<sup>06</sup>; Psychological<sup>01</sup>; Skin<sup>01, 06</sup>; Urological<sup>06</sup>; General and Unspecified<sup>01, 06</sup>

Cognates:

Language contact:

### ***Tithonia* (Asteraceae)**

Spanish names: Amargoso, Arnica; Arnica; Arnica/Girasol; Gigantón, girasol; Girayol silvestre; Mirasol

Indigenous names: Tapungäsy jäyä/tapkuy ay/tat kuy/tan tzitzi/tab kuy/tam tzitzi<sup>01</sup>; Tam tzyi/ tam tzyitz/ tam ay<sup>02</sup>; Tam chich<sup>03</sup>; Nø tamtsy<sup>04</sup>; Chaksu'um<sup>09</sup>; S'um Aq'om<sup>12</sup>; Kaj Taji'os<sup>12</sup>; Ch'aj<sup>18</sup>; Ch'ajkil, neek ch'a te', k'ail, p'ilix<sup>20</sup>; Ru'ulá<sup>21</sup>;

Bàrr-dòo-lä<sup>23</sup>; Bn'ñil-zh'ñil, guièe-bn'ñil-zh'ñil, guizh-bn'ñil-zh'ñil, guièe-bn'ñil-yòx, blàg-bn'ñil, guièe-chòg-zh'ñil<sup>23</sup>; Acahual<sup>28</sup>

Used by (12\*): Zoque<sup>01, 02, 03</sup>; Mixe<sup>04</sup>; Yucatecan Maya<sup>09</sup>; Quichean Maya<sup>12</sup>; Western Maya<sup>18, 20</sup>; Zapotec<sup>21, 23</sup>; Nahuatl<sup>26, 28</sup>

Used for (67#): Blood<sup>02, 12</sup>; Digestive<sup>01, 02, 03, 12, 18, 20, 21, 23, 28</sup>; Eye<sup>02</sup>; Cardiovascular<sup>02, 12, 23</sup>; Musculoskeletal<sup>01, 02, 03, 04, 09, 12, 21, 23, 28</sup>;

Neurological<sup>18</sup>; Psychological<sup>02, 23</sup>; Respiratory<sup>01, 02, 03, 21</sup>; Skin<sup>01, 02, 03, 04, 12, 18, 20, 21, 23, 26</sup>; Endocrine<sup>01, 02, 03</sup>; Urological<sup>02</sup>;

Pregnancy<sup>01, 02, 03, 21</sup>; Female genital<sup>01, 02, 03, 18, 21</sup>; Male genital<sup>02</sup>; General and Unspecified<sup>01, 02, 03, 04, 12, 18, 20, 21</sup>

Cognates: MZ: Tam chi; Zoq: tam chitz; CoreM: s'um, chaj/kaj;

Language contact: MZ > Zap

### ***Tonduzia* (Apocynaceae)**

Spanish names:

Indigenous names: Akab' K'elem<sup>14</sup>

Used by (1\*): Quichean Maya<sup>14</sup>

Used for (3#): Digestive<sup>14</sup>; Skin<sup>14</sup>; General and Unspecified<sup>14</sup>

Cognates:

Language contact:

### ***Topobea* (Melastomataceae)**

Spanish names:

Indigenous names: Oxlaju Ch'ajom, Kaq'i Ch'ajom, Yot' eq<sup>14</sup>

Used by (1\*): Quichean Maya<sup>14</sup>

Used for (1#): Digestive<sup>14</sup>

Cognates:

Language contact:

### ***Tournefortia* (Boraginaceae)**

Spanish names: Hoja de aire; Hoja de cancer; Yerba del cancer

Indigenous names: Mach'much<sup>07</sup>; Waylom te<sup>07</sup>; Xulk'ini, Sal<sup>09</sup>; Kann'bolie kejen<sup>16</sup>; Biajtu mshtajala<sup>21</sup>; Blàg-chòg, guizh-blàg-chòg, guizh-chòg, guizh-cânzi<sup>23</sup>

Used by (8\*): Zoque<sup>01</sup>; Mixe<sup>04</sup>; Huastec<sup>07</sup>; Yucatecan Maya<sup>09</sup>; Quichean Maya<sup>16</sup>; Zapotec<sup>21, 22, 23</sup>

Used for (16#): Digestive<sup>21</sup>; Eye<sup>21</sup>; Musculoskeletal<sup>01, 21</sup>; Neurological<sup>01, 16</sup>; Respiratory<sup>23</sup>; Skin<sup>04, 07, 09, 21, 22, 23</sup>; Female genital<sup>21</sup>;

General and Unspecified<sup>07</sup>

Cognates:

Language contact:

### ***Toxicodendron* (Anacardiaceae)**

Spanish names:

Indigenous names: Ja'yi<sup>01</sup>

Used by (1\*): Zoque<sup>01</sup>

Used for (1#): Skin<sup>01</sup>

Cognates:

Language contact:



### ***Tradescantia* (Commelinaceae)**

Spanish names: Hierba de Pollo; Hierba de pollo/siemprevive/natali/ siemprevive morado/madali; Hierba del pollo; Hoja de azar/tinta china; Lengua de pollo, tripa de pollo, siempre viva; Madali morado; Maguey morado; Maguey morado/ rojo; Matalí; Matlali; Moradito; Pabana; Siemprevive menuda/ hierba de pollo; Uña de Gato, Tripa de Gallina; Zabala morada

Indigenous names: Tzokin u /katzu o /katzu ay/tzapas o<sup>01</sup>; (Tzapas) tzui<sup>01</sup>; (Nama) tzui<sup>01</sup>; Tza'a tzoy<sup>01</sup>; Jam'ay<sup>02</sup>; Jäs'ukä potznä<sup>02</sup>; Tsabats uixpin<sup>03</sup>; Uky ujts<sup>04</sup>; Tsak utek', xutstun pathaam, mili' ch'ohool<sup>07</sup>; Paktha' utek', tsakam k'oyol, uto, yax tsamnek<sup>07</sup>; Chakts'am<sup>09</sup>; Ru Guaij a'k<sup>12</sup>; Loch'och<sup>12</sup>; Pitzijor<sup>13</sup>; Rak'eq<sup>13</sup>; Ka'paj<sup>14</sup>; Asuseen itzuul<sup>14</sup>; Saqi' choq'l, Tz'i' Maaj Q'ehen<sup>14</sup>; Cha cha<sup>15</sup>; Chächäkpimi<sup>18</sup>; Yop'ixpätz<sup>18</sup>; Ak'ach k'opot<sup>19</sup>; Madali<sup>21</sup>; X-tòoz-pëch, guizh-pëch, guizh-guièe-pëch, bläg-pëch, x-tòoz-ngä<sup>23</sup>; Matlali<sup>25</sup>; Matlale<sup>26</sup>

Used by (17\*): Zoque<sup>01, 02, 03</sup>; Mixe<sup>04</sup>; Huastec<sup>07</sup>; Yucatecan Maya<sup>09, 10</sup>; Quichean Maya<sup>12, 13, 14, 15</sup>; Western Maya<sup>18, 19</sup>; Zapotec<sup>21, 23</sup>; Nahua<sup>25, 26</sup>

Used for (103#): Blood<sup>01</sup>; Digestive<sup>01, 02, 03, 07, 12, 13, 18, 21, 26</sup>; Eye<sup>01, 13</sup>; Ear<sup>01, 07</sup>; Cardiovascular<sup>02, 03, 14, 18, 26</sup>; Musculoskeletal<sup>01, 02, 10, 21</sup>; Neurological<sup>07, 12, 14, 18</sup>; Psychological<sup>01, 18</sup>; Respiratory<sup>01, 02, 03, 12, 18</sup>; Skin<sup>01, 02, 09, 12, 13, 14, 18, 21, 26</sup>; Endocrine<sup>01, 02, 14, 18</sup>; Urological<sup>01, 03, 04, 13, 18, 26</sup>; Pregnancy<sup>02, 13, 23</sup>; Female genital<sup>01, 02, 03, 15, 18, 21</sup>; General and Unspecified<sup>01, 02, 07, 12, 14, 18, 19, 21, 25, 26</sup>

Cognates: MZ: uki/ukä; Zoq: uki/ukä; CoreM: cha/chak/chäk; Nah: matlali;

Language contact: MZ <> Maya; Chiapas Zoq <> Kekchí; Chimalapa Zoq <> Tabasco Chontal

### ***Tragia* (Euphorbiaceae)**

Spanish names:

Indigenous names: Tsay kenuk<sup>03</sup>; Tiplay', thinlay', chalam tiya<sup>07</sup>; P'op'ox<sup>09</sup>; P'öop'oš<sup>10</sup>

Used by (4\*): Zoque<sup>03</sup>; Huastec<sup>07</sup>; Yucatecan Maya<sup>09, 10</sup>

Used for (6#): Musculoskeletal<sup>07, 09, 10</sup>; Skin<sup>10</sup>; Urological<sup>03</sup>; General and Unspecified<sup>07</sup>

Cognates: Yuc: p'op'ox;

Language contact:

### ***Trema* (Cannabaceae)**

Spanish names: Capulín; Majagua mixe, jonote

Indigenous names: Tzay kuy<sup>01</sup>; Puwaamte<sup>07</sup>; Lajsa'a baagui<sup>21</sup>

Used by (3\*): Zoque<sup>01</sup>; Huastec<sup>07</sup>; Zapotec<sup>21</sup>

Used for (3#): Skin<sup>21</sup>; Urological<sup>01</sup>; General and Unspecified<sup>07</sup>

Cognates:

Language contact:

### ***Trichilia* (Meliaceae)**

Spanish names: Cualimón, limoncillo; Palo cuchara; Tinajillo

Indigenous names: Yooni cuy<sup>03</sup>; Thokob saantu, k'olol te', thiblab<sup>07</sup>; Čabon Če<sup>10</sup>

Used by (5\*): Zoque<sup>03</sup>; Totonac<sup>05</sup>; Huastec<sup>07</sup>; Yucatecan Maya<sup>10</sup>; Quichean Maya<sup>13</sup>

Used for (13#): Blood<sup>03, 07</sup>; Digestive<sup>10</sup>; Neurological<sup>03, 07</sup>; Psychological<sup>07</sup>; Respiratory<sup>03, 07</sup>; Pregnancy<sup>03</sup>; General and Unspecified<sup>03, 05, 07, 13</sup>

Cognates:

Language contact:

### ***Trichocentrum* (Orchidaceae)**

Spanish names:

Indigenous names: Xutsun buuru, ko'lom te<sup>07</sup>; Puts'ubche', Bac chivo, Puts'maskab<sup>09</sup>; U'tsumpek<sup>09</sup>

Used by (2\*): Huastec<sup>07</sup>; Yucatecan Maya<sup>09</sup>

Used for (3#): Neurological<sup>07</sup>; Skin<sup>09</sup>; Pregnancy<sup>09</sup>

Cognates: Maya: utsum/n;

Language contact:

### ***Trichomanes* (Hymenophyllaceae)**

Spanish names:

Indigenous names: Chimal<sup>03</sup>

Used by (1\*): Zoque<sup>03</sup>

Used for (1#): Neurological<sup>03</sup>

Cognates:

Language contact:

### ***Tridax* (Asteraceae)**

Spanish names: Hierba del toro; Hoja de azar

Indigenous names: Tza'a tzoj<sup>01</sup>; Wakax k'opot<sup>19</sup>

Used by (2\*): Zoque<sup>01</sup>; Western Maya<sup>19</sup>

Used for (5#): Blood<sup>19</sup>; Musculoskeletal<sup>19</sup>; Neurological<sup>19</sup>; General and Unspecified<sup>01, 19</sup>

Cognates:

Language contact:

### ***Trifolium* (Fabaceae)**

Spanish names: Trebol

Indigenous names: Díp-rên, guièe-frôw<sup>23</sup>

Used by (2\*): Zapotec<sup>23</sup>; Nahua<sup>26</sup>

Used for (2#): Cardiovascular<sup>26</sup>; General and Unspecified<sup>23</sup>

Cognates:

Language contact:

### ***Trigonella* (Fabaceae)**

Spanish names: Fenogreco

Indigenous names:

Used by (1\*): Quichean Maya<sup>12</sup>

Used for (4#): Blood<sup>12</sup>; Digestive<sup>12</sup>; Skin<sup>12</sup>; General and Unspecified<sup>12</sup>

Cognates:

Language contact:

### ***Tripogandra* (Commelinaceae)**

Spanish names: Madali blanco; Matalillo; Matalin verde; Siempre viva roja; Tripa de tuza

Indigenous names: Tzapas tzui<sup>01</sup>; Tsus uixpin<sup>03</sup>; Kasmal<sup>05</sup>; A'kasman<sup>06</sup>; Utek witssil thakni', tsakam tshahib<sup>07</sup>; Ik B'olay

Q'eheh<sup>14</sup>; Tzima'j k'ejen<sup>17</sup>; X-tòoz-pěch, guìzh-pěch, guìzh-guìèe-pěch, blàg-pěch, x-tòoz-ngă<sup>23</sup>; Matlale morado<sup>26</sup>

Used by (10\*): Zoque<sup>01, 03</sup>; Totonac<sup>05, 06</sup>; Huastec<sup>07</sup>; Quichean Maya<sup>14, 17</sup>; Zapotec<sup>21, 23</sup>; Nahua<sup>26</sup>

Used for (17#): Digestive<sup>05, 06, 07</sup>; Cardiovascular<sup>26</sup>; Musculoskeletal<sup>14</sup>; Psychological<sup>01</sup>; Skin<sup>01, 07, 14, 21</sup>; Endocrine<sup>07</sup>;

Urological<sup>26</sup>; Pregnancy<sup>23</sup>; General and Unspecified<sup>03, 07, 14</sup>; nd<sup>17</sup>

Cognates: Tot: kasma;

Language contact:

### ***Triumfetta* (Malvaceae)**

Spanish names: Cadillo; Majagua blanca; Mozote

Indigenous names: Ueji ay<sup>03</sup>; Konko<sup>03</sup>; Thipaxi', pitaxe<sup>07</sup>; Mul-och<sup>09</sup>; Kambapixoy<sup>09</sup>; Tzo kon<sup>13</sup>; Woyo'o pim<sup>14</sup>; Cuoyo<sup>17</sup>; Yag lass<sup>21</sup>

Used by (9\*): Zoque<sup>01, 03</sup>; Huastec<sup>07</sup>; Yucatecan Maya<sup>09</sup>; Quichean Maya<sup>13, 14, 17</sup>; Western Maya<sup>20</sup>; Zapotec<sup>21</sup>

Used for (21#): Digestive<sup>01, 07, 09, 13, 14, 20</sup>; Musculoskeletal<sup>07</sup>; Respiratory<sup>07</sup>; Skin<sup>03, 21</sup>; Urological<sup>03, 07</sup>; Pregnancy<sup>07, 09, 14</sup>; Female genital<sup>09, 14</sup>; General and Unspecified<sup>03</sup>; nd<sup>17</sup>

Cognates: Quich: woyo/cuoyo;

Language contact: Hua <> Yuc

### ***Trixis* (Asteraceae)**

Spanish names: Contrimbruja

Indigenous names: Pub kw'ahiil, , thak ts'aah<sup>07</sup>; Fluxion xiw, Xtankas-ak<sup>109</sup>

Used by (4\*): Zoque<sup>03</sup>; Huastec<sup>07</sup>; Yucatecan Maya<sup>09</sup>; Zapotec<sup>21</sup>

Used for (9#): Digestive<sup>07, 21</sup>; Neurological<sup>09</sup>; Respiratory<sup>07</sup>; Skin<sup>03, 07</sup>; Pregnancy<sup>07</sup>; General and Unspecified<sup>03, 07</sup>

Cognates:

Language contact:

### ***Tropaeolum* (Tropaeolaceae)**

Spanish names: Montwerz

Indigenous names: Mältuërs<sup>23</sup>

Used by (2\*): Zapotec<sup>22, 23</sup>

Used for (5#): Neurological<sup>22, 23</sup>; Respiratory<sup>23</sup>; General and Unspecified<sup>22, 23</sup>

Cognates:

Language contact:

### ***Trophis* (Moraceae)**

Spanish names:

Indigenous names: Tsumte', chumte'<sup>07</sup>

Used by (1\*): Huastec<sup>07</sup>

Used for (2#): Neurological<sup>07</sup>; General and Unspecified<sup>07</sup>

Cognates:

Language contact:

### ***Turbina* (Convolvulaceae)**

Spanish names: Bejuco de viento; Flor de virgen ; Piule

Indigenous names: Atsay<sup>03</sup>; Pamaxuunk<sup>04</sup>; Xtabentun<sup>09</sup>; Badoo<sup>21</sup>; Zhì-ncuàan-ná-zhnâzh<sup>23</sup>

Used by (5\*): Zoque<sup>03</sup>; Mixe<sup>04</sup>; Yucatecan Maya<sup>09</sup>; Zapotec<sup>21, 23</sup>

Used for (10#): Digestive<sup>03</sup>; Neurological<sup>09</sup>; Psychological<sup>03, 23</sup>; Respiratory<sup>09</sup>; Pregnancy<sup>09</sup>; General and Unspecified<sup>03, 04, 21, 23</sup>

Cognates:

Language contact:

### ***Turnera* (Passifloraceae)**

Spanish names: Flor de linda tarde; Hoja de fiebre; Itamo real; Malva blanca; Oregano de monte; Salvia blanca

Indigenous names: Oregano k'ax<sup>09</sup>; Lexuuba'a quitzii<sup>21</sup>; Guish fiebre<sup>21</sup>; Salb nol<sup>22</sup>

Used by (6\*): Zoque<sup>02, 03</sup>; Yucatecan Maya<sup>09</sup>; Zapotec<sup>21, 22</sup>; Nahua<sup>27</sup>

Used for (10#): Digestive<sup>21, 22, 27</sup>; Respiratory<sup>09</sup>; Skin<sup>02, 03, 21</sup>; Pregnancy<sup>21</sup>; General and Unspecified<sup>03, 21</sup>

Cognates:

Language contact:

### ***Ulmus* (Ulmaceae)**

Spanish names: Palo cuero

Indigenous names: Pagaxniakcuy<sup>03</sup>

Used by (1\*): Zoque<sup>03</sup>

Used for (1#): Pregnancy<sup>03</sup>

Cognates:

Language contact:

### ***Urera* (Urticaceae)**

Spanish names: Chichicaste; Chichicaste de Caballo; Ortiga; Ortiga real; Ortiga, chichicaste; Ortiga, pica-pica

Indigenous names: Aaamlay', pulik pux lat'em<sup>07</sup>; Tsooklay', choklay<sup>07</sup>; Laal<sup>09</sup>; Lej', Läjy, Yel<sup>12</sup>; Ley<sup>12</sup>; La<sup>13</sup>; Oqob' Q'ehen<sup>14</sup>

Used by (8\*): Zoque<sup>03</sup>; Huastec<sup>07</sup>; Yucatecan Maya<sup>09, 11</sup>; Quichean Maya<sup>12, 13, 14</sup>; Nahuatl<sup>25</sup>

Used for (22#): Digestive<sup>09</sup>; Eye<sup>07</sup>; Musculoskeletal<sup>03, 07, 09, 11, 12, 13, 25</sup>; Neurological<sup>09</sup>; Psychological<sup>07</sup>; Respiratory<sup>07, 14, 25</sup>; Skin<sup>03</sup>; Urological<sup>12</sup>; General and Unspecified<sup>07, 11, 12</sup>

Cognates: Maya: la/lay/ley;

Language contact:

### ***Urtica* (Urticaceae)**

Spanish names: Ortiga; Ortiga menor/ bejucillo; Ortiga roja

Indigenous names: Menuk/ kenuk<sup>01</sup>; La'ix iits', tsakam tsooklay<sup>07</sup>; Ley' pi'y<sup>12</sup>

Used by (3\*): Zoque<sup>01</sup>; Huastec<sup>07</sup>; Quichean Maya<sup>12</sup>

Used for (12#): Blood<sup>12</sup>; Cardiovascular<sup>12</sup>; Musculoskeletal<sup>01, 07</sup>; Neurological<sup>12</sup>; Psychological<sup>12</sup>; Skin<sup>12</sup>; Urological<sup>01, 12</sup>;

Female genital<sup>01</sup>; General and Unspecified<sup>12</sup>

Cognates: Maya: lai/ley;

Language contact:

### ***Urvillea* (Sapindaceae)**

Spanish names:

Indigenous names: Tsaayleelaab ts'ohool, itsaan an t'in kamaab, tsank'ub ts'aah<sup>07</sup>

Used by (1\*): Huastec<sup>07</sup>

Used for (2#): Neurological<sup>07</sup>; General and Unspecified<sup>07</sup>

Cognates:

Language contact:

### ***Valeriana* (Caprifoliaceae)**

Spanish names: Bejuco silvestre, hierba de perrito; Hierba azar de guía/gua blanca; Valeriana; Valeriana Silvestre

Indigenous names: Po'o sudan/ poye rane / Nakta<sup>01</sup>; Puua ay, Puutx ay<sup>03</sup>; Uxe' ulew<sup>13</sup>; Guizh-ngùd-lèn, ngùd-lèn, gù-vàlèriàn<sup>23</sup>; Tetziltzi, tlacote<sup>26</sup>

Used by (6\*): Zoque<sup>01, 03</sup>; Quichean Maya<sup>12, 13</sup>; Zapotec<sup>23</sup>; Nahuatl<sup>26</sup>

Used for (27#): Digestive<sup>01, 12, 23</sup>; Cardiovascular<sup>12</sup>; Musculoskeletal<sup>01, 12, 23</sup>; Neurological<sup>12, 13</sup>; Psychological<sup>01, 12, 13</sup>; Skin<sup>01, 03, 13, 26</sup>; Endocrine<sup>23</sup>; Urological<sup>12</sup>; Female genital<sup>12, 23</sup>; General and Unspecified<sup>01, 03, 12, 13, 23</sup>

Cognates: Zoq: po'o/puua;

Language contact:

### ***Vanilla* (Orchidaceae)**

Spanish names: Vainilla

Indigenous names: Suumii'xa'nat<sup>06</sup>

Used by (3\*): Mixe<sup>04</sup>; Totonac<sup>06</sup>; Zapotec<sup>21</sup>

Used for (4#): Skin<sup>06</sup>; Pregnancy<sup>06</sup>; General and Unspecified<sup>04, 21</sup>

Cognates:

Language contact:

### ***Vasconcellea* (Caricaceae)**

Spanish names: Papaya cimarrona; Papaya de Montaña; Papaya simarron

Indigenous names: Otzo<sup>01</sup>; Mäki mama<sup>02</sup>; Tutun 'chich, tatan chich<sup>06</sup>; Q'ilx Q'en<sup>14</sup>

Used by (4\*): Zoque<sup>01, 02</sup>; Totonac<sup>06</sup>; Quichean Maya<sup>14</sup>

Used for (7#): Digestive<sup>01, 02, 06, 14</sup>; Cardiovascular<sup>14</sup>; Neurological<sup>02</sup>; Respiratory<sup>06</sup>

Cognates:

Language contact:

### ***Vatairea* (Fabaceae)**

Spanish names: Palo picho

Indigenous names: Yʼk cuy<sup>03</sup>

Used by (1\*): Zoque<sup>03</sup>

Used for (1#): Digestive<sup>03</sup>

Cognates:

Language contact:

### ***Vellozia* (Velloziaceae)**

Spanish names:

Indigenous names: Susm kik<sup>14</sup>

Used by (1\*): Quichean Maya<sup>14</sup>

Used for (1#): Neurological<sup>14</sup>

Cognates:

Language contact:

### ***Verbascum* (Scrophulariaceae)**

Spanish names: Oreja de Burro, Hoja Santa

Indigenous names:

Used by (1\*): Quichean Maya<sup>12</sup>

Used for (9#): Blood<sup>12</sup>; Digestive<sup>12</sup>; Neurological<sup>12</sup>; Respiratory<sup>12</sup>; Skin<sup>12</sup>; Urological<sup>12</sup>; Female genital<sup>12</sup>; General and Unspecified<sup>12</sup>

Cognates:

Language contact:

### ***Verbena* (Verbenaceae)**

Spanish names: Diente de ratón; Hierba buenilla, moradita, ; Pitona; Verbena

Indigenous names: Tung'an petkuy/kan petkuy/tak'an petkuy/tzitzirane/ takak rane/ tuk tane<sup>01</sup>; Ejtil i kwayab ts'aale<sup>08</sup>; Chachal' b'ey<sup>12</sup>; Uchachal be', werwen, chachal be'<sup>13</sup>; Xkis Kawaay<sup>14</sup>; Pem k'ulub, yakan k'ulub wamal, yaxal tob tz'i'lel, yax uran nich momol<sup>20</sup>; Pem k'ulub, yakan k'ulub wamal<sup>20</sup>; Ptiôn<sup>23</sup>; Ptiôn-dán, guizh-ptiôn, guièe-ptiôn, bít-wí<sup>23</sup>; Ohpanchichic<sup>26</sup>; Clanquimiche<sup>26</sup>; Ndinich<sup>28</sup>

Used by (13\*): Zoque<sup>01</sup>; Totonac<sup>05</sup>; Huastec<sup>08</sup>; Quichean Maya<sup>12, 13, 14</sup>; Western Maya<sup>18, 19, 20</sup>; Zapotec<sup>21, 23</sup>; Nahua<sup>26, 28</sup>

Used for (56#): Blood<sup>05, 12</sup>; Digestive<sup>01, 05, 08, 12, 13, 18, 19, 20, 21, 23, 26, 28</sup>; Musculoskeletal<sup>01, 12, 13, 14, 19, 26</sup>; Neurological<sup>12, 13, 14</sup>; Psychological<sup>01, 12, 23</sup>; Respiratory<sup>12, 13, 18, 20</sup>; Skin<sup>01, 14</sup>; Endocrine<sup>01</sup>; Urological<sup>01, 12</sup>; Pregnancy<sup>01, 13, 26</sup>; Female genital<sup>12, 14</sup>; General and Unspecified<sup>01, 12, 13, 14, 18, 19, 20, 26, 28</sup>

Cognates: Quich: chachal be;

Language contact:

### ***Verbesina* (Asteraceae)**

Spanish names: Arnica; Bordón de vieja; Capitanec, Capitaneja; Chimpfloque; Huichim; Huixin; Machichili; Paletaria

Indigenous names: Oko kaku<sup>02</sup>; Copanteñicuy<sup>03</sup>; Witsiim, wichin<sup>07</sup>; Taxiwua<sup>08</sup>; Chulkeeh<sup>09</sup>; Axocopa<sup>26</sup>

Used by (11\*): Zoque<sup>01, 02, 03</sup>; Totonac<sup>05, 06</sup>; Huastec<sup>07, 08</sup>; Yucatecan Maya<sup>09</sup>; Quichean Maya<sup>12</sup>; Nahua<sup>26, 27</sup>

Used for (33#): Digestive<sup>01, 03, 05, 06, 07, 12</sup>; Ear<sup>07</sup>; Musculoskeletal<sup>01, 05, 07, 12</sup>; Neurological<sup>07</sup>; Respiratory<sup>09, 27</sup>; Skin<sup>01, 02, 03, 05, 06, 07, 26, 27</sup>; Endocrine<sup>05, 06</sup>; Urological<sup>05</sup>; Pregnancy<sup>06, 26, 27</sup>; General and Unspecified<sup>05, 07, 08, 12, 27</sup>

Cognates:

Language contact:

### ***Vernonanthura* (Asteraceae)**

Spanish names: Hoja de canela; Suquinay

Indigenous names: Ux cuy<sup>03</sup>; Suquinay<sup>13</sup>; Ti'tzin<sup>13</sup>; Suquinay<sup>14</sup>; Holobob te<sup>17</sup>; Bik'tal sitit<sup>20</sup>; Gui'xaan<sup>21</sup>

Used by (6\*): Zoque<sup>03</sup>; Quichean Maya<sup>13, 14, 17</sup>; Western Maya<sup>20</sup>; Zapotec<sup>21</sup>

Used for (13#): Digestive<sup>13, 20, 21</sup>; Eye<sup>03</sup>; Ear<sup>03</sup>; Musculoskeletal<sup>13, 21</sup>; Pregnancy<sup>21</sup>; Female genital<sup>03, 13</sup>; General and Unspecified<sup>14</sup>; nd<sup>17</sup>

Cognates:

Language contact:

### ***Vernonia* (Asteraceae)**

Spanish names:

Indigenous names: Xihuatahua<sup>05</sup>; Suquinay, sucunay, ub'i te<sup>19</sup>

Used by (3\*): Totonac<sup>05</sup>; Quichean Maya<sup>14</sup>; Western Maya<sup>19</sup>

Used for (3#): Digestive<sup>19</sup>; Respiratory<sup>05</sup>; General and Unspecified<sup>14</sup>

Cognates:

Language contact:

### ***Veronica* (Plantaginaceae)**

Spanish names: Trebolillo azul

Indigenous names: Lotz Q'eq'oj Aq'om<sup>12</sup>

Used by (1\*): Quichean Maya<sup>12</sup>

Used for (9#): Blood<sup>12</sup>; Digestive<sup>12</sup>; Eye<sup>12</sup>; Musculoskeletal<sup>12</sup>; Neurological<sup>12</sup>; Psychological<sup>12</sup>; Respiratory<sup>12</sup>; Skin<sup>12</sup>; General and Unspecified<sup>12</sup>

Cognates:

Language contact:

### ***Viburnum* (Adoxaceae)**

Spanish names: Hoja verde

Indigenous names:

Used by (2\*): Zoque<sup>01</sup>; Quichean Maya<sup>13</sup>

Used for (2#): Digestive<sup>01</sup>; Skin<sup>13</sup>

Cognates:

Language contact:

### ***Vicia* (Fabaceae)**

Spanish names: Visia Belluda

Indigenous names:

Used by (1\*): Quichean Maya<sup>12</sup>

Used for (3#): Blood<sup>12</sup>; Urological<sup>12</sup>; General and Unspecified<sup>12</sup>

Cognates:

Language contact:

### ***Vigna* (Fabaceae)**

Spanish names: Flor de guajolote; Frijol torito, frijol tripa de tuza

Indigenous names: X'pal'lihua s'aca<sup>06</sup>

Used by (2\*): Totonac<sup>06</sup>; Zapotec<sup>21</sup>

Used for (2#): Skin<sup>06</sup>; General and Unspecified<sup>21</sup>

Cognates:

Language contact:

### ***Viguiera* (Asteraceae)**

Spanish names: Azaján; Chimalacate

Indigenous names: Thapil bichim<sup>07</sup>; Tah<sup>10</sup>; Qän Kewoj Achin<sup>12</sup>

Used by (4\*): Huastec<sup>07</sup>; Yucatecan Maya<sup>10</sup>; Quichean Maya<sup>12</sup>; Nahua<sup>27</sup>

Used for (9#): Musculoskeletal<sup>12</sup>; Skin<sup>07, 10, 27</sup>; Urological<sup>12</sup>; Pregnancy<sup>27</sup>; Male genital<sup>12</sup>; General and Unspecified<sup>10, 12</sup>

Cognates: Maya: tha/tah;

Language contact:

### ***Vinca* (Apocynaceae)**

Spanish names: Vincapervinca

Indigenous names:

Used by (1\*): Quichean Maya<sup>12</sup>

Used for (3#): Cardiovascular<sup>12</sup>; Urological<sup>12</sup>; General and Unspecified<sup>12</sup>

Cognates:

Language contact:

### ***Viola* (Violaceae)**

Spanish names: Trebol real

Indigenous names: Trebo'l Aq'om<sup>12</sup>

Used by (1\*): Quichean Maya<sup>12</sup>

Used for (7#): Blood<sup>12</sup>; Digestive<sup>12</sup>; Neurological<sup>12</sup>; Psychological<sup>12</sup>; Respiratory<sup>12</sup>; Skin<sup>12</sup>; General and Unspecified<sup>12</sup>

Cognates:

Language contact:

### ***Viola* (Myristicaceae)**

Spanish names: Cedrillo

Indigenous names: J̄mniom cas<sup>03</sup>

Used by (1\*): Zoque<sup>03</sup>

Used for (2#): Musculoskeletal<sup>03</sup>; Skin<sup>03</sup>

Cognates:

Language contact:

### ***Vismia* (Hypericaceae)**

Spanish names: Cayamita; Huacalilla, lecherilla

Indigenous names: Q'an parwuay, Qan' paraway<sup>14</sup>, K'anparaquay che<sup>17</sup>

Used by (4\*): Zoque<sup>03</sup>; Quichean Maya<sup>14, 17</sup>; Nahua<sup>26</sup>

Used for (7#): Digestive<sup>03, 14</sup>; Skin<sup>03, 26</sup>; Urological<sup>03</sup>; Female genital<sup>03</sup>; nd<sup>17</sup>

Cognates: Quich: para(q)way;

Language contact:

### ***Vitex* (Lamiaceae)**

Spanish names: Beo; Ceresa negra; Coyotomate

Indigenous names: Jäk'yi'äye<sup>02</sup>; Ya'axnik<sup>09</sup>; YaŠnik<sup>10</sup>; Boyajsa'a<sup>21</sup>; Cuahuilotl<sup>28</sup>

Used by (5\*): Zoque<sup>02</sup>; Yucatecan Maya<sup>09, 10</sup>; Zapotec<sup>21</sup>; Nahua<sup>28</sup>

Used for (8#): Digestive<sup>02</sup>; Musculoskeletal<sup>02</sup>; Respiratory<sup>02, 21, 28</sup>; Skin<sup>10, 28</sup>; General and Unspecified<sup>09</sup>

Cognates: Yuc: yaxnik;

Language contact: Yuc > Chimalapa Zoq & Zap

### ***Vitis* (Vitaceae)**

Spanish names: Agras; Bejuco de uva; Siete corazon, parra; Totoloché; Uva; Uva de Montaña ; Uva silvestre; Uva/bejuco negro/uva silvestre/ corraleña

Indigenous names: ku'untu/ku'untatz ay<sup>01</sup>; Po'on tzu'u<sup>02</sup>; Mopst̄m<sup>03</sup>; Ȳk tȳm tsay<sup>03</sup>; Snuun'gut<sup>06</sup>; T'uthub<sup>07</sup>; Tusúp<sup>13</sup>;

Tu'sub' Kaham<sup>14</sup>; T'u zub k'aham<sup>17</sup>; Chuyur ch'a'n<sup>19</sup>

Used by (10\*): Zoque<sup>01, 02, 03</sup>; Totonac<sup>06</sup>; Huastec<sup>07</sup>; Quichean Maya<sup>12, 13, 14, 17</sup>; Western Maya<sup>19</sup>

Used for (28#): Digestive<sup>02, 03, 13</sup>; Eye<sup>01, 02, 03, 07, 12, 19</sup>; Ear<sup>01</sup>; Cardiovascular<sup>06</sup>; Neurological<sup>07</sup>; Respiratory<sup>03</sup>; Skin<sup>03</sup>;

Endocrine<sup>01, 12</sup>; Urological<sup>03</sup>; Pregnancy<sup>07, 14</sup>; Female genital<sup>03</sup>; Male genital<sup>01, 14</sup>; General and Unspecified<sup>01, 07, 12</sup>; nd<sup>17</sup>

Cognates: Zoq: u'untu/o'ontzu; Maya: t'uthub/t'usub; Quich: tusup (kaham);

Language contact: Mayan <> Tot

### ***Vittaria* (Pteridaceae)**

Spanish names:

Indigenous names: Rubel xsa' kanti<sup>14</sup>

Used by (1\*): Quichean Maya<sup>14</sup>

Used for (1#): Skin<sup>14</sup>

Cognates:

Language contact:

### ***Volkameria* (Lamiaceae)**

Spanish names: Moste

Indigenous names: Muts<sup>03</sup>

Used by (1\*): Zoque<sup>03</sup>

Used for (3#): Neurological<sup>03</sup>; Psychological<sup>03</sup>; General and Unspecified<sup>03</sup>

Cognates:

Language contact:

### ***Waltheria* (Malvaceae)**

Spanish names: Malvarisco amarillo

Indigenous names: Pun¥g ay<sup>03</sup>; Piniaka<sup>03</sup>; Alshoob nagatzi<sup>21</sup>

Used by (2\*): Zoque<sup>03</sup>; Zapotec<sup>21</sup>

Used for (7#): Digestive<sup>03, 21</sup>; Psychological<sup>03</sup>; Skin<sup>21</sup>; Urological<sup>03</sup>; Pregnancy<sup>21</sup>; Female genital<sup>03</sup>

Cognates:

Language contact:

### ***Wedelia* (Asteraceae)**

Spanish names: Orozus

Indigenous names: Sahun<sup>09</sup>

Used by (2\*): Yucatecan Maya<sup>09, 10</sup>

Used for (2#): Neurological<sup>10</sup>; Skin<sup>09</sup>

Cognates:

Language contact:

### ***Wigandia* (Boraginaceae)**

Spanish names: Chichicaste, Chacom, Chocon; Chocón; Hoja de San Pablo

Indigenous names: Blàg-wê<sup>23</sup>

Used by (3\*): Quichean Maya<sup>12, 13</sup>; Zapotec<sup>23</sup>

Used for (11#): Digestive<sup>13</sup>; Cardiovascular<sup>12</sup>; Neurological<sup>12</sup>; Psychological<sup>12</sup>; Respiratory<sup>13, 23</sup>; Skin<sup>12, 23</sup>; Pregnancy<sup>12</sup>; General and Unspecified<sup>12, 23</sup>

Cognates:

Language contact:

### ***Wimmeria* (Celastraceae)**

Spanish names: Canserina

Indigenous names:

Used by (1\*): Zoque<sup>03</sup>

Used for (3#): Digestive<sup>03</sup>; Pregnancy<sup>03</sup>; Female genital<sup>03</sup>

Cognates:

Language contact:



### ***Wissadula* (Malvaceae)**

Spanish names:

Indigenous names: Puk ay<sup>03</sup>; Jʼmniom cuy puk<sup>03</sup>

Used by (1\*): Zoque<sup>03</sup>

Used for (2#): Skin<sup>03</sup>; General and Unspecified<sup>03</sup>

Cognates:

Language contact:

### ***Witheringia* (Solanaceae)**

Spanish names: Hoja de sapo

Indigenous names: Kunya<sup>01</sup>; Naj ka bokste/tziski boni rane<sup>01</sup>

Used by (1\*): Zoque<sup>01</sup>

Used for (4#): Musculoskeletal<sup>01</sup>; Skin<sup>01</sup>; Endocrine<sup>01</sup>; General and Unspecified<sup>01</sup>

Cognates:

Language contact:

### ***Xanthosoma* (Araceae)**

Spanish names: Mafafa blanca; Mafafa morada; Malanga Silvestre; Quequeste; Tepesquite

Indigenous names: Poko<sup>01</sup>; Pix ay<sup>03</sup>; Tujk aay<sup>04</sup>; Paxni'cac<sup>06</sup>; Ts'ikiy luum<sup>07</sup>; Luum<sup>07</sup>; Xtup<sup>13</sup>; Marak<sup>14</sup>; Biu'ulú<sup>21</sup>

Used by (8\*): Zoque<sup>01, 03</sup>; Mixe<sup>04</sup>; Totonac<sup>06</sup>; Huastec<sup>07</sup>; Quichean Maya<sup>13, 14</sup>; Zapotec<sup>21</sup>

Used for (18#): Blood<sup>06</sup>; Musculoskeletal<sup>01, 21</sup>; Respiratory<sup>01</sup>; Skin<sup>01, 03, 04, 06, 07, 13, 14, 21</sup>; Pregnancy<sup>06, 13</sup>; General and Unspecified<sup>07, 14, 21</sup>

Cognates:

Language contact: Zoq <> Tot

### ***Ximenia* (Olacaceae)**

Spanish names:

Indigenous names: Paja pitx cuy<sup>03</sup>; Ma'ap ujts<sup>04</sup>; Nabche', Tsu'tsup<sup>09</sup>

Used by (3\*): Zoque<sup>03</sup>; Mixe<sup>04</sup>; Yucatecan Maya<sup>09</sup>

Used for (4#): Digestive<sup>03, 09</sup>; Female genital<sup>04</sup>; General and Unspecified<sup>03</sup>

Cognates:

Language contact: Mixe <> Yuc

### ***Xiphidium* (Haemodoraceae)**

Spanish names:

Indigenous names: X cua' li k'uch<sup>17</sup>

Used by (1\*): Quichean Maya<sup>17</sup>

Used for (1#): nd<sup>17</sup>

Cognates:

Language contact:

### ***Xylosma* (Salicaceae)**

Spanish names: Chatay; Espina de brujo/espina de cruz

Indigenous names: Yatzi apit/cruz apit<sup>01</sup>; Jaman juix apitx<sup>03</sup>; Tsak k'iith, wi' chunun<sup>07</sup>; Puts'ukche', Xchaknif<sup>09</sup>

Used by (6\*): Zoque<sup>01, 03</sup>; Totonac<sup>05, 06</sup>; Huastec<sup>07</sup>; Yucatecan Maya<sup>09</sup>

Used for (17#): Digestive<sup>06, 07</sup>; Musculoskeletal<sup>01, 07</sup>; Respiratory<sup>05, 06, 07</sup>; Skin<sup>03, 07, 09</sup>; Endocrine<sup>06</sup>; Urological<sup>06</sup>; Female genital<sup>03</sup>; General and Unspecified<sup>01, 03, 07</sup>

Cognates: Zoq: apit(x);

Language contact:

### ***Yucca* (Asparagaceae)**

Spanish names: Equizote, yucca; Izote; Maguey silvestre

Indigenous names: A'ka'lokot<sup>06</sup>; Tsamnek k'oyol, chemnek k'oyol<sup>07</sup>; K'oyol<sup>07</sup>; Tuk<sup>09</sup>; Oq'ki<sup>13</sup>; Sit'a<sup>19</sup>; Ikzote<sup>26</sup>

Used by (9\*): Zoque<sup>01, 03</sup>; Totonac<sup>06</sup>; Huastec<sup>07</sup>; Yucatecan Maya<sup>09</sup>; Quichean Maya<sup>12, 13</sup>; Western Maya<sup>19</sup>; Nahua<sup>26</sup>

Used for (25#): Ear<sup>06, 07, 12, 13, 19, 26</sup>; Cardiovascular<sup>01</sup>; Musculoskeletal<sup>12</sup>; Neurological<sup>12, 13, 19</sup>; Psychological<sup>09</sup>; Respiratory<sup>12, 13, 19</sup>; Skin<sup>26</sup>; Endocrine<sup>03, 12</sup>; Pregnancy<sup>07</sup>; Male genital<sup>12</sup>; General and Unspecified<sup>07, 12, 19</sup>

Cognates:

Language contact:

### ***Zaluzania* (Asteraceae)**

Spanish names: Hierba amarga

Indigenous names: Chichitzihuatl<sup>25</sup>

Used by (1\*): Nahua<sup>25</sup>

Used for (2#): Digestive<sup>25</sup>; Pregnancy<sup>25</sup>

Cognates:

Language contact:

### ***Zamia* (Zamiaceae)**

Spanish names: Mais Viejo

Indigenous names: Pekmuk kobak<sup>03</sup>; Jꞑmniom pekmuꞑ<sup>03</sup>; Møj mook<sup>04</sup>; Tsalam thipaak, tsakam way', ahaatik a eem<sup>07</sup>; Q'ixtab<sup>14</sup>; Ox Q'en<sup>14</sup>; Sikad<sup>17</sup>

Used by (5\*): Zoque<sup>03</sup>; Mixe<sup>04</sup>; Huastec<sup>07</sup>; Quichean Maya<sup>14, 17</sup>

Used for (16#): Blood<sup>14</sup>; Digestive<sup>03, 07, 14</sup>; Musculoskeletal<sup>07</sup>; Skin<sup>03, 14</sup>; Endocrine<sup>07</sup>; Urological<sup>03, 07</sup>; Female genital<sup>03</sup>; Male genital<sup>03</sup>; General and Unspecified<sup>04, 07, 14</sup>; nd<sup>17</sup>

Cognates: MZ: mook/muk;

Language contact:

### ***Zanthoxylum* (Rutaceae)**

Spanish names: Limoncillo; Mata de escorpión; Tachuelillo; Zorrillo cimarrón, zorrillo bravo, zorrillo de castilla, sasafraés de espina

Indigenous names: Apitx cuy<sup>03</sup>; Copixpix<sup>03</sup>; Wi'puuy<sup>07</sup>; Sinanche<sup>09</sup>; Sina'an ché<sup>11</sup>; Tujen a'uch cimarrón<sup>18</sup>; Leben sutz<sup>20</sup>

Used by (7\*): Zoque<sup>03</sup>; Huastec<sup>07</sup>; Yucatecan Maya<sup>09, 11</sup>; Quichean Maya<sup>17</sup>; Western Maya<sup>18, 20</sup>

Used for (21#): Blood<sup>03</sup>; Digestive<sup>03, 07, 20</sup>; Musculoskeletal<sup>07, 11, 18</sup>; Neurological<sup>07, 09</sup>; Respiratory<sup>03, 07</sup>; Skin<sup>03, 18</sup>; Urological<sup>03</sup>; Pregnancy<sup>07</sup>; Female genital<sup>03</sup>; General and Unspecified<sup>07, 09, 11, 18</sup>; nd<sup>17</sup>

Cognates: Yuc: sinanche;

Language contact:

### ***Zapoteca* (Fabaceae)**

Spanish names: Barba de chivo

Indigenous names: Tenzonhuaxi<sup>26</sup>

Used by (2\*): Zoque<sup>03</sup>; Nahua<sup>26</sup>

Used for (2#): Skin<sup>03</sup>; General and Unspecified<sup>26</sup>

Cognates:

Language contact:

## **Zea (Poaceae)**

Spanish names: Cabello de elote; Maís; Maïs, Cabello de elote, Atole, Pinole; Maiz; Maíz, barba de maíz, totomosle morado; Maíz/tortomosle morado/granos de maíz/pelo de elote; Pelo de elote/elote morado/maíz morado/cabello de maz/ colochi morado

Indigenous names: Mok owai/ japinjoke/ mojkuy su yaj/ tzapas tokok/ tzapas okxi/ tzapas äksi<sup>01</sup>; Mok/u'kä japo, äksi, mok angwa'y/mok puj<sup>02</sup>; Mok<sup>03</sup>; Mook, mook kuay, <sup>04</sup>; Cuxi<sup>05</sup>; Cuxi<sup>06</sup>; Eem, ithith<sup>07</sup>; Eem<sup>08</sup>; ISim<sup>10</sup>; Ixim<sup>12</sup>; Ixim, jal, wi jal, uwijal, tzmi'y<sup>13</sup>; Ixim<sup>18</sup>; Ixim, nar<sup>19</sup>; Xhuba'a, bacuejlu'u moradu'u<sup>21</sup>; Žob<sup>22</sup>; Zhöb, döz, wgà, pcuêl<sup>23</sup>; Tlaoli<sup>28</sup>

Used by (20\*): Zoque<sup>01, 02, 03</sup>; Mixe<sup>04</sup>; Totonac<sup>05, 06</sup>; Huastec<sup>07, 08</sup>; Yucatecan Maya<sup>09, 10</sup>; Quichean Maya<sup>12, 13, 14</sup>; Western Maya<sup>18, 19</sup>; Zapotec<sup>21, 22, 23</sup>; Nahua<sup>25, 28</sup>

Used for (71#): Digestive<sup>01, 02, 04, 05, 07, 08, 09, 12, 13, 14, 18, 21, 28</sup>; Eye<sup>06</sup>; Musculoskeletal<sup>01, 07, 08, 18</sup>; Neurological<sup>12</sup>; Psychological<sup>07</sup>; Respiratory<sup>02, 07, 23, 28</sup>; Skin<sup>01, 02, 03, 07, 21</sup>; Endocrine<sup>01, 07, 08, 09, 12, 18</sup>; Urological<sup>01, 02, 03, 04, 06, 07, 08, 09, 10, 12, 13, 18, 19, 21, 25, 28</sup>; Pregnancy<sup>01, 03, 22, 23</sup>; Female genital<sup>02, 03, 10</sup>; Male genital<sup>01, 12, 13</sup>; General and Unspecified<sup>01, 02, 07, 08, 12, 13, 21, 22, 28</sup>

Cognates: MZ: mok, mok wai; Zoq: mok, äksi; Tot: cuxi; Maya: ixim/ithith; Hua: eem; CoreM: ixim; Quich: ixim; Zap: zhob;  
Language contact:

## **Zephyranthes (Amaryllidaceae)**

Spanish names: Brujita; Cebolla de Zopilote

Indigenous names: Xnaket Q'os<sup>12</sup>; Ajtz'a 'taya<sup>18</sup>

Used by (2\*): Quichean Maya<sup>12</sup>; Western Maya<sup>18</sup>

Used for (4#): Ear<sup>18</sup>; Endocrine<sup>12</sup>; Urological<sup>12</sup>; General and Unspecified<sup>12</sup>

Cognates:

Language contact:

## **Zexmenia (Asteraceae)**

Spanish names:

Indigenous names:

Used by (1\*): Zoque<sup>03</sup>

Used for (1#): Skin<sup>03</sup>

Cognates:

Language contact:

## **Zingiber (Zingiberaceae)**

Spanish names: Ajenjible; Gengibre; Genjibre; Jengibre; Jenjibre

Indigenous names: Kaxtxan ñiwi<sup>03</sup>; Caxta'lam pin<sup>06</sup>; Laab ist<sup>07</sup>; Xan Xir<sup>14</sup>; Xinxibeer<sup>15</sup>; Chilcamotle<sup>26</sup>

Used by (12\*): Zoque<sup>01, 03</sup>; Totonac<sup>06</sup>; Huastec<sup>07</sup>; Yucatecan Maya<sup>09</sup>; Quichean Maya<sup>12, 13, 14, 15</sup>; Western Maya<sup>19</sup>; Zapotec<sup>21</sup>; Nahua<sup>26</sup>

Used for (35#): Digestive<sup>01, 03, 06, 07, 09, 12, 14</sup>; Musculoskeletal<sup>03, 06, 07, 13, 21</sup>; Neurological<sup>06, 12, 26</sup>; Psychological<sup>06, 12</sup>; Respiratory<sup>01, 07, 14, 21</sup>; Skin<sup>03, 12, 21</sup>; Endocrine<sup>01</sup>; Pregnancy<sup>06, 19</sup>; Female genital<sup>01, 03, 15, 19</sup>; General and Unspecified<sup>12, 15, 21, 26</sup>

Cognates:

Language contact:

## **Zinnia (Asteraceae)**

Spanish names: Clavenia; Molinillo

Indigenous names:

Used by (2\*): Zoque<sup>03</sup>; Quichean Maya<sup>12</sup>

Used for (2#): Neurological<sup>03</sup>; Psychological<sup>12</sup>

Cognates:

Language contact:

## **Ziziphus (Rhamnaceae)**

Spanish names: Pendeno

Indigenous names:

Used by (1\*): Zapotec<sup>21</sup>

Used for (1#): Female genital<sup>21</sup>

Cognates:

Language contact:

### **Zornia (Fabaceae)**

Spanish names:

Indigenous names: Tsaiñiy<sup>03</sup>; Naax wiin aats<sup>04</sup>

Used by (2\*): Zoque<sup>03</sup>; Mixe<sup>04</sup>

Used for (2#): Digestive<sup>04</sup>; Skin<sup>03</sup>

Cognates:

Language contact:

### **Zuelania (Salicaceae)**

Spanish names:

Indigenous names: Bolantin, tatham te<sup>07</sup>; Tamay, Bot'ox<sup>09</sup>

Used by (2\*): Huastec<sup>07</sup>; Yucatecan Maya<sup>09</sup>

Used for (3#): Eye<sup>07</sup>; Neurological<sup>07</sup>; Female genital<sup>09</sup>

Cognates:

Language contact:
